# Supplementary material for: Reduced Heme Levels Underlie the Exponential Growth Defect of the Shewanella oneidensis hfq Mutant
Source: PLoS One. 2014 Oct 30;9(10):e109879. doi: 10.1371/journal.pone.0109879 (PMC4214671; doi:10.1371/journal.pone.0109879)
Supplement: Data S3 — Data for Figure 2B and 2C . Raw and processed data for heme assays. (XLSX) [file pone.0109879.s003.xlsx]

## Sheet: Fig 2B data and Fig 2C raw data
549.999	-0.000885277	549.999	0.0439337	549.999	0.121345	549.999	0.0390948	549.999	0.103285	549.999	0.0497806	549.999	0.112351	549.999	0.0230759	549.999	0.0641013	549.999	0.0219795	549.999	0.061333	549.999	0.0225558	549.999	0.0627466
534.969	0.00684505	534.969	0.0646669	534.969	0.0472028	534.969	0.0589835	534.969	0.0415135	534.969	0.0704468	534.969	0.0483659	534.969	0.0403581	534.969	0.0355823	534.969	0.0389714	534.969	0.0338015	534.969	0.0403446	534.969	0.0361083
					0.0774111	0	-0.08225	0	0.0641897	0	-0.0535039	0	0.0625703	0	-0.0892749	0	0.0410254	0	-0.0421218	0	0.0393535	0	-0.0387772	0	0.0401908
					-0.0174641	0	0.0117807	0	-0.01747	0	0.0289333	0	-0.0220809	0	-0.00800788	0	-0.00477579	0	0.00338908	0	-0.00516981	0	0.00654308	0	-0.00423633
				mr1 4hr #1	0.0948752	0	-0.0940307	mr1 4hr red #2	0.0816598	0	-0.0824372	mr1 4hr red #3	0.0846512	0	-0.0812671	15 4hr red #1	0.0458012	0	-0.0455109	15 4hr red #2	0.0445233	0	-0.0453203	15 4hr red #3	0.0444272
				mr1 4hr #2	0.0816598											15 4hr red #2	0.0445233
				mr1 4hr #3	0.0846512											15 4hr red #3	0.0444272
				mr1 4hr mean	0.087062				mean	stdev
				stdev	0.00692972			mr1 4hr mean	0.087062	0.00692972		comparison ttest
								15 4hr mean	0.0449172	0.000767067		0.00047034	***
				15 4hr #1	0.0458012				mean	stdev
				15 4hr #2	0.0445233			mr1 4hr mean	0.087062	0.00692972
				15 4hr #3	0.0444272			15 4hr mean	0.0449172	0.000767067
				15 4hr mean	0.0449172
				stdev	0.000767067
																												subtraction spectra				shifted subtraction spectra
bper alone		mr1 4hr ox #1		mr1 4hr red #1		mr1 4hr ox #2		mr1 4hr red #2		mr1 4hr ox #3		mr1 4hr red #3		15 4hr ox #1		15 4hr red #1		15 4hr ox #2		15 4hr red #2		15 4hr ox #3		15 4hr red #3
Wavelength (nm)	Abs	Wavelength (nm)	Abs	Wavelength (nm)	Abs	Wavelength (nm)	Abs	Wavelength (nm)	Abs	Wavelength (nm)	Abs	Wavelength (nm)	Abs	Wavelength (nm)	Abs	Wavelength (nm)	Abs	Wavelength (nm)	Abs	Wavelength (nm)	Abs	Wavelength (nm)	Abs	Wavelength (nm)	Abs		Wavelength (nm)	mr1 4hr red #1-mr1 4hr ox #1	15 4hr red #3-15 4hr ox #3		Wavelength (nm)	MR1	hfq∆
700.034	-0.000947944	700.034	-0.00942205	700.034	-0.0148021	700.034	-0.0104327	700.034	-0.016566	700.034	-0.00439446	700.034	-0.00819133	700.034	-0.0131753	700.034	-0.0215457	700.034	-0.0133402	700.034	-0.019876	700.034	-0.01503	700.034	-0.0132542		700.034	-0.00538005	-0.00837041		700.034	0.012084	-0.00359462
699.026	-0.000493986	699.026	-0.00940072	699.026	-0.0145437	699.026	-0.0103054	699.026	-0.0162575	699.026	-0.00355606	699.026	-0.00774509	699.026	-0.0129694	699.026	-0.0209095	699.026	-0.0135226	699.026	-0.0197932	699.026	-0.0150577	699.026	-0.0129997		699.026	-0.00514296	-0.00794008		699.026	0.0123211	-0.0031643
698.019	6.14059e-05	698.019	-0.00897327	698.019	-0.0143703	698.019	-0.00997264	698.019	-0.0161487	698.019	-0.00372348	698.019	-0.00756232	698.019	-0.0127453	698.019	-0.0208093	698.019	-0.0130027	698.019	-0.0192513	698.019	-0.0144614	698.019	-0.0128112		698.019	-0.00539705	-0.00806403		698.019	0.012067	-0.00328825
697.01	0.000427899	697.01	-0.00851062	697.01	-0.0137569	697.01	-0.00919311	697.01	-0.0154625	697.01	-0.00326106	697.01	-0.0070918	697.01	-0.0120678	697.01	-0.0200241	697.01	-0.0122548	697.01	-0.0189882	697.01	-0.0138001	697.01	-0.0121437		697.01	-0.0052463	-0.00795624		697.01	0.0122178	-0.00318045
696.002	0.000773203	696.002	-0.00779446	696.002	-0.0131229	696.002	-0.00882957	696.002	-0.0149344	696.002	-0.00259661	696.002	-0.00642446	696.002	-0.0115298	696.002	-0.0197097	696.002	-0.0118634	696.002	-0.0182997	696.002	-0.0134832	696.002	-0.0118328		696.002	-0.00532841	-0.00817989		696.002	0.0121357	-0.0034041
694.993	0.00154833	694.993	-0.00729945	694.993	-0.0127955	694.993	-0.00824056	694.993	-0.0148833	694.993	-0.00240533	694.993	-0.00606529	694.993	-0.0109305	694.993	-0.0190863	694.993	-0.0110962	694.993	-0.018123	694.993	-0.0130888	694.993	-0.011043		694.993	-0.00549609	-0.00815581		694.993	0.011968	-0.00338002
693.984	0.00163074	693.984	-0.00689739	693.984	-0.0125627	693.984	-0.00810084	693.984	-0.0139985	693.984	-0.0018051	693.984	-0.00582844	693.984	-0.010854	693.984	-0.018843	693.984	-0.0113065	693.984	-0.0176707	693.984	-0.0125619	693.984	-0.0103834		693.984	-0.00566529	-0.00798901		693.984	0.0117988	-0.00321322
692.975	0.00223978	692.975	-0.00678405	692.975	-0.0121775	692.975	-0.00728158	692.975	-0.0139954	692.975	-0.00159052	692.975	-0.00565626	692.975	-0.0102395	692.975	-0.0182087	692.975	-0.0104791	692.975	-0.0176087	692.975	-0.0126912	692.975	-0.0101219		692.975	-0.0053935	-0.00796919		692.975	0.0120706	-0.0031934
691.965	0.0028826	691.965	-0.00633508	691.965	-0.0115934	691.965	-0.0070945	691.965	-0.0134021	691.965	-0.000305037	691.965	-0.00458384	691.965	-0.00978666	691.965	-0.0178823	691.965	-0.0099609	691.965	-0.01683	691.965	-0.0122658	691.965	-0.00961001		691.965	-0.00525833	-0.00809569		691.965	0.0122057	-0.0033199
690.955	0.00334899	690.955	-0.00563526	690.955	-0.0112992	690.955	-0.00681957	690.955	-0.0131157	690.955	-0.000113625	690.955	-0.00460454	690.955	-0.00960652	690.955	-0.0174929	690.955	-0.0098108	690.955	-0.0166452	690.955	-0.0117084	690.955	-0.00952524		690.955	-0.00566392	-0.00788634		690.955	0.0118002	-0.00311055
689.945	0.00366245	689.945	-0.00543212	689.945	-0.0109975	689.945	-0.00639059	689.945	-0.0125413	689.945	-0.000301622	689.945	-0.00390192	689.945	-0.00888192	689.945	-0.0173659	689.945	-0.00918347	689.945	-0.016512	689.945	-0.0113482	689.945	-0.00843385		689.945	-0.00556536	-0.00848396		689.945	0.0118987	-0.00370817
688.934	0.00326241	688.934	-0.00504092	688.934	-0.0101922	688.934	-0.00620143	688.934	-0.012422	688.934	0.000345197	688.934	-0.00377691	688.934	-0.00864442	688.934	-0.0170453	688.934	-0.00891809	688.934	-0.0166478	688.934	-0.0112997	688.934	-0.008663		688.934	-0.00515131	-0.00840085		688.934	0.0123128	-0.00362506
688.067	0.00383188	688.067	-0.00500555	688.067	-0.010309	688.067	-0.00584821	688.067	-0.0120294	688.067	0.000898447	688.067	-0.00362553	688.067	-0.00814062	688.067	-0.0162904	688.067	-0.00804422	688.067	-0.015699	688.067	-0.010582	688.067	-0.00785569		688.067	-0.00530342	-0.00814978		688.067	0.0121606	-0.003374
687.056	0.00421087	687.056	-0.00425524	687.056	-0.00971781	687.056	-0.00591205	687.056	-0.0116649	687.056	0.00101374	687.056	-0.00306452	687.056	-0.00790144	687.056	-0.0160779	687.056	-0.00777723	687.056	-0.0151209	687.056	-0.0101763	687.056	-0.00683379		687.056	-0.00546257	-0.00817648		687.056	0.0120015	-0.0034007
686.044	0.00451609	686.044	-0.00413413	686.044	-0.00895658	686.044	-0.00517446	686.044	-0.0108847	686.044	0.00157917	686.044	-0.00279912	686.044	-0.00725827	686.044	-0.0156367	686.044	-0.00729436	686.044	-0.0149135	686.044	-0.00973102	686.044	-0.00652219		686.044	-0.00482245	-0.00837841		686.044	0.0126416	-0.00360262
685.032	0.0052007	685.032	-0.00363708	685.032	-0.00915691	685.032	-0.00486428	685.032	-0.011104	685.032	0.00205037	685.032	-0.00302961	685.032	-0.00661082	685.032	-0.0154111	685.032	-0.00695634	685.032	-0.0149229	685.032	-0.00960292	685.032	-0.00612696		685.032	-0.00551983	-0.00880026		685.032	0.0119442	-0.00402447
684.02	0.00522292	684.02	-0.0034309	684.02	-0.00869167	684.02	-0.00467241	684.02	-0.0105326	684.02	0.00194718	684.02	-0.00230585	684.02	-0.0065353	684.02	-0.0152139	684.02	-0.00620087	684.02	-0.0147951	684.02	-0.00928712	684.02	-0.00579989		684.02	-0.00526077	-0.00867857		684.02	0.0122033	-0.00390278
683.007	0.00558255	683.007	-0.00327113	683.007	-0.00841603	683.007	-0.00415633	683.007	-0.0103283	683.007	0.00271891	683.007	-0.00182181	683.007	-0.00595342	683.007	-0.0143108	683.007	-0.00624145	683.007	-0.0146839	683.007	-0.00861021	683.007	-0.00586655		683.007	-0.0051449	-0.00835734		683.007	0.0123192	-0.00358155
681.995	0.00581241	681.995	-0.00277407	681.995	-0.00815434	681.995	-0.00402032	681.995	-0.00979875	681.995	0.00269885	681.995	-0.00187676	681.995	-0.00553355	681.995	-0.0142875	681.995	-0.00547328	681.995	-0.0143518	681.995	-0.00851808	681.995	-0.00501205		681.995	-0.00538027	-0.00875392		681.995	0.0120838	-0.00397813
680.981	0.00560247	680.981	-0.00256043	680.981	-0.00779111	680.981	-0.00351174	680.981	-0.00944363	680.981	0.00334927	680.981	-0.00145556	680.981	-0.00553631	680.981	-0.0143818	680.981	-0.00584234	680.981	-0.0140715	680.981	-0.00846574	680.981	-0.00488286		680.981	-0.00523068	-0.00884553		680.981	0.0122334	-0.00406974
679.968	0.00673407	679.968	-0.00220541	679.968	-0.0077253	679.968	-0.00333941	679.968	-0.00921221	679.968	0.00329945	679.968	-0.00125356	679.968	-0.00523477	679.968	-0.0140495	679.968	-0.00542072	679.968	-0.0141088	679.968	-0.00800392	679.968	-0.0047374		679.968	-0.00551989	-0.00881472		679.968	0.0119442	-0.00403893
678.954	0.00668217	678.954	-0.00177865	678.954	-0.00708085	678.954	-0.00312302	678.954	-0.00876834	678.954	0.00339678	678.954	-0.000944845	678.954	-0.0047545	678.954	-0.0136819	678.954	-0.00511399	678.954	-0.0138799	678.954	-0.00763446	678.954	-0.00411526		678.954	-0.00530219	-0.00892743		678.954	0.0121619	-0.00415164
677.94	0.00672528	677.94	-0.00196382	677.94	-0.00711191	677.94	-0.0028431	677.94	-0.00867244	677.94	0.00370884	677.94	-0.000584629	677.94	-0.00441229	677.94	-0.013171	677.94	-0.00508252	677.94	-0.0134661	677.94	-0.00727435	677.94	-0.00388463		677.94	-0.0051481	-0.00875874		677.94	0.012316	-0.00398296
677.07	0.00707427	677.07	-0.00140587	677.07	-0.00707641	677.07	-0.00254653	677.07	-0.0082592	677.07	0.00412917	677.07	-0.000168071	677.07	-0.00360617	677.07	-0.0131231	677.07	-0.00461002	677.07	-0.013363	677.07	-0.00732318	677.07	-0.00371742		677.07	-0.00567055	-0.0095169		677.07	0.0117935	-0.00474111
676.055	0.00714673	676.055	-0.00122015	676.055	-0.00637636	676.055	-0.00224791	676.055	-0.00786438	676.055	0.00433743	676.055	-6.08278e-05	676.055	-0.00330268	676.055	-0.0128099	676.055	-0.00448204	676.055	-0.012876	676.055	-0.0066123	676.055	-0.00288769		676.055	-0.0051562	-0.00950719		676.055	0.0123079	-0.0047314
675.04	0.00754449	675.04	-0.000579097	675.04	-0.00595388	675.04	-0.00204813	675.04	-0.00715403	675.04	0.00464394	675.04	0.000127585	675.04	-0.00323382	675.04	-0.0125816	675.04	-0.00425104	675.04	-0.012436	675.04	-0.0063887	675.04	-0.00317		675.04	-0.00537478	-0.00934782		675.04	0.0120893	-0.00457203
674.025	0.00770372	674.025	-0.000425926	674.025	-0.00610552	674.025	-0.00125263	674.025	-0.00717511	674.025	0.00519229	674.025	0.000405667	674.025	-0.00294765	674.025	-0.0119433	674.025	-0.00376526	674.025	-0.0120894	674.025	-0.00599708	674.025	-0.00338873		674.025	-0.0056796	-0.00899565		674.025	0.0117845	-0.00421986
673.009	0.00765771	673.009	-0.000454165	673.009	-0.00586808	673.009	-0.00138012	673.009	-0.00677228	673.009	0.00495436	673.009	0.000901897	673.009	-0.00282186	673.009	-0.0121965	673.009	-0.00386082	673.009	-0.011947	673.009	-0.00576847	673.009	-0.00256609		673.009	-0.00541391	-0.00937467		673.009	0.0120502	-0.00459888
671.993	0.00808874	671.993	-0.000362615	671.993	-0.0057866	671.993	-0.00123564	671.993	-0.00685066	671.993	0.00561105	671.993	0.000849891	671.993	-0.00194083	671.993	-0.0119341	671.993	-0.00351303	671.993	-0.0114946	671.993	-0.00564579	671.993	-0.0020675		671.993	-0.00542399	-0.00999325		671.993	0.0120401	-0.00521746
670.976	0.00835089	670.976	0.000384965	670.976	-0.00485112	670.976	-0.000903257	670.976	-0.00606157	670.976	0.00599339	670.976	0.00111076	670.976	-0.002349	670.976	-0.0110328	670.976	-0.00335344	670.976	-0.0111906	670.976	-0.0052361	670.976	-0.00198727		670.976	-0.00523608	-0.00868381		670.976	0.012228	-0.00390802
669.96	0.00844014	669.96	0.000406704	669.96	-0.00472029	669.96	-0.000724203	669.96	-0.0061456	669.96	0.0064023	669.96	0.000879978	669.96	-0.00162379	669.96	-0.0108048	669.96	-0.00370777	669.96	-0.0107766	669.96	-0.00496328	669.96	-0.00201463		669.96	-0.005127	-0.00918102		669.96	0.0123371	-0.00440524
668.943	0.00897606	668.943	0.000857023	668.943	-0.00444714	668.943	-0.000176662	668.943	-0.00572024	668.943	0.00682575	668.943	0.00150256	668.943	-0.00134007	668.943	-0.0104453	668.943	-0.00297485	668.943	-0.010181	668.943	-0.00412403	668.943	-0.0023078		668.943	-0.00530417	-0.00910519		668.943	0.0121599	-0.0043294
668.07	0.0090928	668.07	0.00120051	668.07	-0.00419787	668.07	-0.000290499	668.07	-0.00599371	668.07	0.00696633	668.07	0.00163861	668.07	-0.00169811	668.07	-0.0107223	668.07	-0.00308375	668.07	-0.0106403	668.07	-0.00459649	668.07	-0.00190429		668.07	-0.00539838	-0.00902418		668.07	0.0120657	-0.00424839
667.053	0.00866817	667.053	0.001032	667.053	-0.00466949	667.053	-0.000579045	667.053	-0.00607351	667.053	0.00676551	667.053	0.00163822	667.053	-0.00157339	667.053	-0.0108587	667.053	-0.0038113	667.053	-0.0105444	667.053	-0.0044927	667.053	-0.00265677		667.053	-0.00570149	-0.00928535		667.053	0.0117626	-0.00450956
666.035	0.00817367	666.035	0.000470603	666.035	-0.00425042	666.035	-0.000271925	666.035	-0.00565325	666.035	0.00677101	666.035	0.00142365	666.035	-0.00170904	666.035	-0.0109542	666.035	-0.00343393	666.035	-0.0102499	666.035	-0.00447999	666.035	-0.00262419		666.035	-0.00472102	-0.00924518		666.035	0.012743	-0.00446939
665.017	0.00843112	665.017	0.000505174	665.017	-0.0046091	665.017	-0.000445528	665.017	-0.00582911	665.017	0.00685946	665.017	0.00146388	665.017	-0.00195578	665.017	-0.0111779	665.017	-0.00371968	665.017	-0.0102885	665.017	-0.00485025	665.017	-0.00309994		665.017	-0.00511427	-0.00922212		665.017	0.0123498	-0.00444633
663.998	0.00808953	663.998	0.000872015	663.998	-0.00416777	663.998	-0.00047511	663.998	-0.00589234	663.998	0.00691296	663.998	0.00117653	663.998	-0.00215576	663.998	-0.0107558	663.998	-0.00369242	663.998	-0.0102871	663.998	-0.00472086	663.998	-0.00321286		663.998	-0.00503978	-0.00860002		663.998	0.0124243	-0.00382423
662.979	0.00808663	662.979	0.000927241	662.979	-0.00449864	662.979	-0.000315177	662.979	-0.00542282	662.979	0.00681747	662.979	0.00137473	662.979	-0.00199706	662.979	-0.0107004	662.979	-0.00359267	662.979	-0.010129	662.979	-0.0047396	662.979	-0.00329096		662.979	-0.00542588	-0.00870331		662.979	0.0120382	-0.00392752
661.96	0.00838398	661.96	0.000536792	661.96	-0.00433265	661.96	-0.000300329	661.96	-0.00540513	661.96	0.00704477	661.96	0.00169526	661.96	-0.00188125	661.96	-0.0108397	661.96	-0.00358528	661.96	-0.00997947	661.96	-0.00427185	661.96	-0.00373472		661.96	-0.00486944	-0.00895841		661.96	0.0125946	-0.00418262
660.94	0.0086636	660.94	0.00133063	660.94	-0.0035252	660.94	0.000165961	660.94	-0.00505366	660.94	0.00761603	660.94	0.00201073	660.94	-0.00181815	660.94	-0.0105353	660.94	-0.00340733	660.94	-0.0096087	660.94	-0.00401683	660.94	-0.00389258		660.94	-0.00485583	-0.00871712		660.94	0.0126082	-0.00394133
660.066	0.00843265	660.066	0.00160751	660.066	-0.00411587	660.066	0.000231586	660.066	-0.00522618	660.066	0.0076624	660.066	0.00195667	660.066	-0.0017027	660.066	-0.0105442	660.066	-0.00290261	660.066	-0.0098772	660.066	-0.0037882	660.066	-0.00402463		660.066	-0.00572339	-0.00884151		660.066	0.0117407	-0.00406572
659.046	0.00816563	659.046	0.00135463	659.046	-0.00416623	659.046	-0.000194205	659.046	-0.00546612	659.046	0.00762826	659.046	0.00177747	659.046	-0.00195903	659.046	-0.0105524	659.046	-0.00324862	659.046	-0.00983226	659.046	-0.00393393	659.046	-0.00462518		659.046	-0.00552086	-0.00859342		659.046	0.0119432	-0.00381763
658.026	0.00841235	658.026	0.000989323	658.026	-0.0045386	658.026	-0.000282221	658.026	-0.0055887	658.026	0.00762178	658.026	0.0014282	658.026	-0.00246551	658.026	-0.0107937	658.026	-0.00332544	658.026	-0.00970303	658.026	-0.00413834	658.026	-0.00497607		658.026	-0.00552793	-0.00832819		658.026	0.0119361	-0.0035524
657.005	0.00840095	657.005	0.00116098	657.005	-0.00366691	657.005	0.000305329	657.005	-0.00547982	657.005	0.00748318	657.005	0.00176692	657.005	-0.00252461	657.005	-0.0105334	657.005	-0.00337373	657.005	-0.0101043	657.005	-0.00403709	657.005	-0.00531824		657.005	-0.00482789	-0.00800884		657.005	0.0126362	-0.00323305
655.984	0.00812857	655.984	0.00154797	655.984	-0.0040991	655.984	0.000523186	655.984	-0.00558901	655.984	0.00823643	655.984	0.00193082	655.984	-0.00218244	655.984	-0.010634	655.984	-0.00319703	655.984	-0.00979329	655.984	-0.0038796	655.984	-0.0054559		655.984	-0.00564707	-0.0084516		655.984	0.011817	-0.00367581
654.963	0.00855827	654.963	0.00141895	654.963	-0.00400524	654.963	0.000261113	654.963	-0.00520219	654.963	0.00839287	654.963	0.00155389	654.963	-0.00235338	654.963	-0.0105359	654.963	-0.00289289	654.963	-0.00952194	654.963	-0.00410321	654.963	-0.00583135		654.963	-0.00542419	-0.00818254		654.963	0.0120399	-0.00340675
653.941	0.00813967	653.941	0.00151864	653.941	-0.00362692	653.941	0.00042212	653.941	-0.00537987	653.941	0.00881032	653.941	0.00173362	653.941	-0.00220732	653.941	-0.0104539	653.941	-0.00304617	653.941	-0.00931991	653.941	-0.00383962	653.941	-0.00570976		653.941	-0.00514556	-0.00824658		653.941	0.0123185	-0.00347079
653.065	0.00815231	653.065	0.00173414	653.065	-0.00374011	653.065	0.000729795	653.065	-0.00555686	653.065	0.00878527	653.065	0.00149178	653.065	-0.00215138	653.065	-0.00995453	653.065	-0.00271738	653.065	-0.00970723	653.065	-0.00411105	653.065	-0.00620174		653.065	-0.00547425	-0.00780315		653.065	0.0119898	-0.00302736
652.043	0.00825239	652.043	0.00163939	652.043	-0.00340543	652.043	0.000905321	652.043	-0.00549746	652.043	0.00865005	652.043	0.00161728	652.043	-0.0021844	652.043	-0.0100174	652.043	-0.00311299	652.043	-0.00937341	652.043	-0.00410592	652.043	-0.00638656		652.043	-0.00504482	-0.00783302		652.043	0.0124193	-0.00305723
651.021	0.00844613	651.021	0.0019575	651.021	-0.00339017	651.021	0.000979386	651.021	-0.00527682	651.021	0.0089962	651.021	0.00175493	651.021	-0.00245311	651.021	-0.0102986	651.021	-0.00289973	651.021	-0.00929411	651.021	-0.00402099	651.021	-0.0061971		651.021	-0.00534767	-0.00784546		651.021	0.0121164	-0.00306967
649.998	0.00859412	649.998	0.00183213	649.998	-0.0033688	649.998	0.00145897	649.998	-0.00488306	649.998	0.00937237	649.998	0.0020518	649.998	-0.00205173	649.998	-0.0100501	649.998	-0.00226449	649.998	-0.00911813	649.998	-0.00422294	649.998	-0.0062838		649.998	-0.00520093	-0.00799841		649.998	0.0122631	-0.00322262
648.975	0.00838823	648.975	0.0025183	648.975	-0.00291042	648.975	0.00145419	648.975	-0.00564528	648.975	0.00969453	648.975	0.00208098	648.975	-0.00188738	648.975	-0.00998959	648.975	-0.00237382	648.975	-0.00894264	648.975	-0.00406592	648.975	-0.00647323		648.975	-0.00542873	-0.00810221		648.975	0.0120353	-0.00332642
647.951	0.00810082	647.951	0.00277645	647.951	-0.00358112	647.951	0.00175205	647.951	-0.00522787	647.951	0.00982796	647.951	0.00202035	647.951	-0.00183918	647.951	-0.00997026	647.951	-0.00216204	647.951	-0.00914368	647.951	-0.0036111	647.951	-0.00648986		647.951	-0.00635757	-0.00813108		647.951	0.0111065	-0.00335529
646.927	0.0084219	646.927	0.00295555	646.927	-0.00298087	646.927	0.00218722	646.927	-0.00486387	646.927	0.00997613	646.927	0.00214619	646.927	-0.00132448	646.927	-0.00971619	646.927	-0.00192547	646.927	-0.0090723	646.927	-0.00387493	646.927	-0.00662357		646.927	-0.00593642	-0.00839171		646.927	0.0115277	-0.00361592
646.05	0.00871655	646.05	0.00312288	646.05	-0.00286172	646.05	0.00220582	646.05	-0.00489709	646.05	0.0100611	646.05	0.00228969	646.05	-0.00152614	646.05	-0.0095772	646.05	-0.00181165	646.05	-0.00891824	646.05	-0.00383726	646.05	-0.00642712		646.05	-0.00598459	-0.00805106		646.05	0.0114795	-0.00327527
645.025	0.00811912	645.025	0.00307673	645.025	-0.00313998	645.025	0.00262892	645.025	-0.0050335	645.025	0.0106318	645.025	0.00236755	645.025	-0.00133026	645.025	-0.00948355	645.025	-0.00131266	645.025	-0.00859707	645.025	-0.0036934	645.025	-0.00706796		645.025	-0.00621671	-0.00815329		645.025	0.0112474	-0.0033775
644.001	0.00834611	644.001	0.0037861	644.001	-0.00258081	644.001	0.00239189	644.001	-0.00469346	644.001	0.0105091	644.001	0.0023046	644.001	-0.000516739	644.001	-0.00961736	644.001	-0.00130791	644.001	-0.00858976	644.001	-0.00349839	644.001	-0.00714981		644.001	-0.00636691	-0.00910062		644.001	0.0110972	-0.00432483
642.976	0.00858729	642.976	0.00376492	642.976	-0.00282083	642.976	0.00298701	642.976	-0.00474221	642.976	0.0111264	642.976	0.00246501	642.976	-0.00113661	642.976	-0.00938882	642.976	-0.00105889	642.976	-0.00857255	642.976	-0.00319852	642.976	-0.00721845		642.976	-0.00658575	-0.0082522		642.976	0.0108783	-0.00347641
641.951	0.00852223	641.951	0.00428106	641.951	-0.00277031	641.951	0.00329517	641.951	-0.0041651	641.951	0.0114723	641.951	0.00259072	641.951	-0.000598175	641.951	-0.00896962	641.951	-0.000757384	641.951	-0.00870826	641.951	-0.00308909	641.951	-0.0069489		641.951	-0.00705137	-0.00837144		641.951	0.0104127	-0.00359565
641.072	0.00858916	641.072	0.00415003	641.072	-0.00236589	641.072	0.00348489	641.072	-0.00429528	641.072	0.0114367	641.072	0.00225419	641.072	-0.000434977	641.072	-0.00932482	641.072	-0.000215939	641.072	-0.00890439	641.072	-0.00269752	641.072	-0.00713911		641.072	-0.00651592	-0.00888985		641.072	0.0109482	-0.00411406
640.046	0.00907477	640.046	0.00450108	640.046	-0.00262584	640.046	0.00390584	640.046	-0.00438605	640.046	0.011863	640.046	0.002564	640.046	3.43779e-05	640.046	-0.00890176	640.046	-6.29501e-05	640.046	-0.00870928	640.046	-0.00276682	640.046	-0.00701957		640.046	-0.00712692	-0.00893614		640.046	0.0103372	-0.00416035
639.02	0.00869777	639.02	0.00483265	639.02	-0.00224142	639.02	0.00399513	639.02	-0.00430881	639.02	0.0121679	639.02	0.00292571	639.02	0.000412482	639.02	-0.0091814	639.02	0.000218403	639.02	-0.00886585	639.02	-0.00245408	639.02	-0.00699771		639.02	-0.00707407	-0.00959388		639.02	0.01039	-0.00481809
637.993	0.00857863	637.993	0.00512343	637.993	-0.00235662	637.993	0.00439236	637.993	-0.0038914	637.993	0.0125906	637.993	0.0023105	637.993	0.000460885	637.993	-0.00883115	637.993	0.000517303	637.993	-0.00863285	637.993	-0.00237181	637.993	-0.00696139		637.993	-0.00748005	-0.00929203		637.993	0.00998403	-0.00451624
636.967	0.00873097	636.967	0.00541587	636.967	-0.00200773	636.967	0.00461712	636.967	-0.00387436	636.967	0.012452	636.967	0.00262981	636.967	0.00075741	636.967	-0.00846142	636.967	0.00065852	636.967	-0.00863153	636.967	-0.00199479	636.967	-0.00713549		636.967	-0.00742359	-0.00921883		636.967	0.0100405	-0.00444304
635.94	0.00885007	635.94	0.00574027	635.94	-0.00205951	635.94	0.00566796	635.94	-0.003905	635.94	0.012956	635.94	0.00289688	635.94	0.00101984	635.94	-0.0082852	635.94	0.00105123	635.94	-0.00833021	635.94	-0.00173673	635.94	-0.00662387		635.94	-0.00779978	-0.00930504		635.94	0.00966429	-0.00452925
635.059	0.00892611	635.059	0.00632184	635.059	-0.00167511	635.059	0.00570793	635.059	-0.00338801	635.059	0.0132543	635.059	0.00329481	635.059	0.00186736	635.059	-0.00820139	635.059	0.00149188	635.059	-0.0080397	635.059	-0.0012836	635.059	-0.0065787		635.059	-0.00799695	-0.0100687		635.059	0.00946712	-0.00529296
634.031	0.00885377	634.031	0.00661041	634.031	-0.00093255	634.031	0.00602336	634.031	-0.00375484	634.031	0.0134244	634.031	0.00304018	634.031	0.00186499	634.031	-0.00805693	634.031	0.00149778	634.031	-0.00784501	634.031	-0.00109535	634.031	-0.00648873		634.031	-0.00754296	-0.00992192		634.031	0.00992111	-0.00514613
633.004	0.0087811	633.004	0.00668769	633.004	-0.00153801	633.004	0.00649602	633.004	-0.00393988	633.004	0.0137236	633.004	0.00317038	633.004	0.00185124	633.004	-0.00849529	633.004	0.0016693	633.004	-0.00815526	633.004	-0.00113093	633.004	-0.00681952		633.004	-0.0082257	-0.0103465		633.004	0.00923837	-0.00557074
631.975	0.00865031	631.975	0.00686033	631.975	-0.00118928	631.975	0.00669127	631.975	-0.00343604	631.975	0.0142873	631.975	0.00332316	631.975	0.00200863	631.975	-0.00818889	631.975	0.00178433	631.975	-0.0082818	631.975	-0.000996656	631.975	-0.00656294		631.975	-0.00804961	-0.0101975		631.975	0.00941446	-0.00542173
630.947	0.00930519	630.947	0.00764309	630.947	-0.00112205	630.947	0.00743351	630.947	-0.00317529	630.947	0.014658	630.947	0.00327884	630.947	0.00290087	630.947	-0.00778201	630.947	0.00198439	630.947	-0.00784028	630.947	-0.000598589	630.947	-0.0062813		630.947	-0.00876514	-0.0106829		630.947	0.00869893	-0.00590709
630.065	0.00913806	630.065	0.00755229	630.065	-0.000748753	630.065	0.007847	630.065	-0.00285148	630.065	0.0152128	630.065	0.00371654	630.065	0.0027112	630.065	-0.00752161	630.065	0.00197003	630.065	-0.0079534	630.065	-0.000132205	630.065	-0.00643706		630.065	-0.00830104	-0.0102328		630.065	0.00916303	-0.00545702
629.036	0.00891703	629.036	0.00804122	629.036	-0.000730715	629.036	0.00846794	629.036	-0.00295213	629.036	0.0152699	629.036	0.00352367	629.036	0.00312134	629.036	-0.007478	629.036	0.00221961	629.036	-0.0075441	629.036	0.000156509	629.036	-0.006239		629.036	-0.00877194	-0.0105993		629.036	0.00869214	-0.00582355
628.007	0.00895222	628.007	0.00815217	628.007	-0.000410513	628.007	0.00890619	628.007	-0.00270045	628.007	0.0153203	628.007	0.00389325	628.007	0.00371568	628.007	-0.00740126	628.007	0.0024434	628.007	-0.00741266	628.007	0.000479699	628.007	-0.00637233		628.007	-0.00856269	-0.0111169		628.007	0.00890139	-0.00634115
626.977	0.00906697	626.977	0.00865689	626.977	-0.000548178	626.977	0.00910414	626.977	-0.00270868	626.977	0.015734	626.977	0.00364545	626.977	0.0036283	626.977	-0.00747704	626.977	0.00259035	626.977	-0.00769555	626.977	0.000618053	626.977	-0.00629518		626.977	-0.00920507	-0.0111053		626.977	0.008259	-0.00632955
625.948	0.00912814	625.948	0.0090287	625.948	-0.0006324	625.948	0.00949856	625.948	-0.0027003	625.948	0.0162847	625.948	0.00390639	625.948	0.00406024	625.948	-0.00738136	625.948	0.0025841	625.948	-0.00738935	625.948	0.000922571	625.948	-0.00623665		625.948	-0.0096611	-0.0114416		625.948	0.00780297	-0.00666581
625.065	0.00874785	625.065	0.00911315	625.065	-0.000728648	625.065	0.00943745	625.065	-0.00274089	625.065	0.0159518	625.065	0.0033914	625.065	0.00401342	625.065	-0.00773023	625.065	0.00248237	625.065	-0.00781308	625.065	0.000758318	625.065	-0.00631452		625.065	-0.0098418	-0.0117437		625.065	0.00762227	-0.00696786
624.034	0.00874668	624.034	0.00928332	624.034	-0.000148508	624.034	0.010369	624.034	-0.00261771	624.034	0.0162636	624.034	0.00373657	624.034	0.00444445	624.034	-0.0070922	624.034	0.00311943	624.034	-0.00726855	624.034	0.00102928	624.034	-0.0061753		624.034	-0.00943183	-0.0115367		624.034	0.00803224	-0.00676087
623.003	0.00869233	623.003	0.00977765	623.003	-0.000431408	623.003	0.0110508	623.003	-0.00253732	623.003	0.0168415	623.003	0.00399568	623.003	0.00456875	623.003	-0.00720781	623.003	0.00316092	623.003	-0.00724192	623.003	0.00202623	623.003	-0.00602894		623.003	-0.0102091	-0.0117766		623.003	0.00725501	-0.00700076
621.972	0.00917555	621.972	0.0106416	621.972	0.000215373	621.972	0.0117588	621.972	-0.00234946	621.972	0.0172455	621.972	0.00419869	621.972	0.00502838	621.972	-0.00686126	621.972	0.00366075	621.972	-0.00690167	621.972	0.00217866	621.972	-0.00555532		621.972	-0.0104262	-0.0118896		621.972	0.00703789	-0.00711385
620.941	0.0088552	620.941	0.0108634	620.941	0.000284684	620.941	0.0121257	620.941	-0.00209996	620.941	0.0175044	620.941	0.00445403	620.941	0.00527482	620.941	-0.006858	620.941	0.00364519	620.941	-0.00673247	620.941	0.00252666	620.941	-0.00541975		620.941	-0.0105787	-0.0121328		620.941	0.00688537	-0.00735703
620.057	0.00922396	620.057	0.0114038	620.057	9.23192e-05	620.057	0.0126446	620.057	-0.00177551	620.057	0.0179393	620.057	0.00457796	620.057	0.00566019	620.057	-0.00720032	620.057	0.00379973	620.057	-0.00669831	620.057	0.0030614	620.057	-0.00530863		620.057	-0.0113114	-0.0128605		620.057	0.00615262	-0.00808473
619.025	0.00917562	619.025	0.011391	619.025	0.000336519	619.025	0.0131155	619.025	-0.00192197	619.025	0.0181121	619.025	0.00480346	619.025	0.00554893	619.025	-0.0063559	619.025	0.00407816	619.025	-0.00629411	619.025	0.00304287	619.025	-0.00535113		619.025	-0.0110544	-0.0119048		619.025	0.00640963	-0.00712904
617.993	0.00902268	617.993	0.0116939	617.993	0.000461922	617.993	0.013658	617.993	-0.00186491	617.993	0.0183548	617.993	0.0049475	617.993	0.00587377	617.993	-0.00643181	617.993	0.00417133	617.993	-0.00633508	617.993	0.00369602	617.993	-0.00516607		617.993	-0.011232	-0.0123056		617.993	0.00623212	-0.00752979
616.96	0.00901158	616.96	0.0118659	616.96	0.000397091	616.96	0.0141398	616.96	-0.00143667	616.96	0.0187108	616.96	0.00480446	616.96	0.00615147	616.96	-0.00640411	616.96	0.00448957	616.96	-0.00631682	616.96	0.00380589	616.96	-0.00518505		616.96	-0.0114688	-0.0125556		616.96	0.00599528	-0.00777979
615.928	0.0088836	615.928	0.0125131	615.928	0.000797372	615.928	0.0145769	615.928	-0.00147284	615.928	0.0191702	615.928	0.00493443	615.928	0.00654003	615.928	-0.00637472	615.928	0.0048727	615.928	-0.00605718	615.928	0.00391551	615.928	-0.00478563		615.928	-0.0117157	-0.0129148		615.928	0.00574839	-0.00813897
615.042	0.00886949	615.042	0.0126029	615.042	0.000542391	615.042	0.015005	615.042	-0.00160749	615.042	0.0194726	615.042	0.00505352	615.042	0.00685142	615.042	-0.00633095	615.042	0.00513616	615.042	-0.00593688	615.042	0.00437416	615.042	-0.0051894		615.042	-0.0120605	-0.0131824		615.042	0.00540356	-0.00840658
614.009	0.00907205	614.009	0.013179	614.009	0.00113614	614.009	0.0156419	614.009	-0.00172621	614.009	0.0197912	614.009	0.00494001	614.009	0.00677847	614.009	-0.00615989	614.009	0.00535344	614.009	-0.00549204	614.009	0.00448831	614.009	-0.00488132		614.009	-0.0120428	-0.0129384		614.009	0.00542125	-0.00816257
612.975	0.00880672	612.975	0.0132435	612.975	0.00111798	612.975	0.0162183	612.975	-0.00138491	612.975	0.0199666	612.975	0.00502128	612.975	0.00681405	612.975	-0.00605376	612.975	0.00566515	612.975	-0.005538	612.975	0.00508846	612.975	-0.0046072		612.975	-0.0121255	-0.0128678		612.975	0.00533856	-0.00809202
611.941	0.00882915	611.941	0.0136402	611.941	0.000911702	611.941	0.0164126	611.941	-0.00126837	611.941	0.0201274	611.941	0.00531871	611.941	0.00723569	611.941	-0.00571641	611.941	0.00565948	611.941	-0.00564333	611.941	0.00551485	611.941	-0.00435499		611.941	-0.0127285	-0.0129521		611.941	0.00473555	-0.0081763
611.055	0.0088943	611.055	0.0138944	611.055	0.00125329	611.055	0.0168307	611.055	-0.00120709	611.055	0.0206662	611.055	0.0052788	611.055	0.00739409	611.055	-0.00565948	611.055	0.00627775	611.055	-0.00515901	611.055	0.00565652	611.055	-0.00410346		611.055	-0.0126411	-0.0130536		611.055	0.00482293	-0.00827778
610.021	0.009043	610.021	0.0141811	610.021	0.00131838	610.021	0.0170008	610.021	-0.00143884	610.021	0.0208201	610.021	0.00534796	610.021	0.00761717	610.021	-0.00558374	610.021	0.00598205	610.021	-0.00524986	610.021	0.00547007	610.021	-0.00404063		610.021	-0.0128627	-0.0132009		610.021	0.00460132	-0.00842512
608.986	0.00871491	608.986	0.0144503	608.986	0.00107653	608.986	0.0172418	608.986	-0.00164169	608.986	0.0211358	608.986	0.00531937	608.986	0.00764867	608.986	-0.00559294	608.986	0.00616325	608.986	-0.00530147	608.986	0.00601824	608.986	-0.00418961		608.986	-0.0133738	-0.0132416		608.986	0.00409026	-0.00846583
607.951	0.00851996	607.951	0.0147209	607.951	0.00143453	607.951	0.0177909	607.951	-0.00123218	607.951	0.0217817	607.951	0.00549983	607.951	0.00796085	607.951	-0.00527963	607.951	0.00675768	607.951	-0.00494096	607.951	0.00645521	607.951	-0.00392008		607.951	-0.0132864	-0.0132405		607.951	0.00417769	-0.0084647
607.064	0.00859811	607.064	0.0152768	607.064	0.00132791	607.064	0.0181825	607.064	-0.00124772	607.064	0.0219563	607.064	0.00575873	607.064	0.00812406	607.064	-0.00504757	607.064	0.00690002	607.064	-0.00486274	607.064	0.00655015	607.064	-0.00387939		607.064	-0.0139489	-0.0131716		607.064	0.00351522	-0.00839584
606.028	0.00895627	606.028	0.0156247	606.028	0.0015475	606.028	0.0184323	606.028	-0.00126264	606.028	0.0223897	606.028	0.00558517	606.028	0.00845028	606.028	-0.00520567	606.028	0.0072015	606.028	-0.00464208	606.028	0.00686186	606.028	-0.00353721		606.028	-0.0140772	-0.0136559		606.028	0.00338688	-0.00888015
604.992	0.00853279	604.992	0.0155924	604.992	0.00141921	604.992	0.0186751	604.992	-0.0015053	604.992	0.0226702	604.992	0.00549957	604.992	0.00849024	604.992	-0.00538053	604.992	0.00726804	604.992	-0.00488266	604.992	0.00688705	604.992	-0.00392937		604.992	-0.0141731	-0.0138708		604.992	0.00329093	-0.00909498
603.956	0.00832716	603.956	0.0158901	603.956	0.0012441	603.956	0.0188997	603.956	-0.00180211	603.956	0.0229061	603.956	0.00541898	603.956	0.0087072	603.956	-0.0052539	603.956	0.00744557	603.956	-0.00488767	603.956	0.00686491	603.956	-0.00373513		603.956	-0.014646	-0.0139611		603.956	0.00281812	-0.00918531
603.068	0.00826521	603.068	0.0162681	603.068	0.00118286	603.068	0.0195083	603.068	-0.00208373	603.068	0.0233601	603.068	0.00530585	603.068	0.00887369	603.068	-0.0057023	603.068	0.00785694	603.068	-0.00487216	603.068	0.00744362	603.068	-0.00364499		603.068	-0.0150852	-0.014576		603.068	0.00237888	-0.00980021
602.031	0.00809963	602.031	0.0167516	602.031	0.00145708	602.031	0.019796	602.031	-0.00188681	602.031	0.0238032	602.031	0.00533635	602.031	0.00914414	602.031	-0.00540645	602.031	0.0081728	602.031	-0.0046051	602.031	0.00745937	602.031	-0.0034609		602.031	-0.0152946	-0.0145506		602.031	0.00216952	-0.0097748
600.994	0.00837524	600.994	0.017213	600.994	0.0013076	600.994	0.020268	600.994	-0.00157314	600.994	0.0240812	600.994	0.00550033	600.994	0.00941943	600.994	-0.00542261	600.994	0.0083121	600.994	-0.004624	600.994	0.00765336	600.994	-0.00317714		600.994	-0.0159054	-0.014842		600.994	0.00155867	-0.0100663
599.957	0.00773963	599.957	0.0173869	599.957	0.00142708	599.957	0.0203666	599.957	-0.00183444	599.957	0.0245981	599.957	0.00540108	599.957	0.00965996	599.957	-0.00505847	599.957	0.0088673	599.957	-0.00477903	599.957	0.00809913	599.957	-0.00293613		599.957	-0.0159598	-0.0147184		599.957	0.00150426	-0.00994264
599.068	0.0081799	599.068	0.0178262	599.068	0.00129273	599.068	0.020707	599.068	-0.00172131	599.068	0.02467	599.068	0.00575427	599.068	0.00989731	599.068	-0.00518797	599.068	0.00917914	599.068	-0.00457206	599.068	0.00839889	599.068	-0.00247663		599.068	-0.0165335	-0.0150853		599.068	0.000930615	-0.0103095
598.03	0.0078959	598.03	0.0183916	598.03	0.00150677	598.03	0.0214521	598.03	-0.00192341	598.03	0.0253769	598.03	0.00544355	598.03	0.0102014	598.03	-0.00495442	598.03	0.0092453	598.03	-0.00435587	598.03	0.00853195	598.03	-0.00234555		598.03	-0.0168848	-0.0151558		598.03	0.000579226	-0.01038
596.992	0.00773821	596.992	0.0186156	596.992	0.00116078	596.992	0.0212971	596.992	-0.00201159	596.992	0.025653	596.992	0.00506319	596.992	0.0102302	596.992	-0.00523354	596.992	0.0094221	596.992	-0.00464731	596.992	0.00857086	596.992	-0.00273549		596.992	-0.0174548	-0.0154637		596.992	9.24573e-06	-0.0106879
595.954	0.00775286	595.954	0.0187057	595.954	0.00105453	595.954	0.0214696	595.954	-0.00212876	595.954	0.0256992	595.954	0.0050221	595.954	0.0104722	595.954	-0.00538406	595.954	0.00992727	595.954	-0.00481441	595.954	0.00873654	595.954	-0.00229086		595.954	-0.0176512	-0.0158563		595.954	-0.000187122	-0.0110805
595.064	0.00754657	595.064	0.0193097	595.064	0.00100829	595.064	0.0219822	595.064	-0.0022596	595.064	0.0265547	595.064	0.00521076	595.064	0.010515	595.064	-0.00551249	595.064	0.0103116	595.064	-0.00468004	595.064	0.00902136	595.064	-0.00213968		595.064	-0.0183014	-0.0160275		595.064	-0.000837363	-0.0112517
594.025	0.00729839	594.025	0.0197572	594.025	0.00103452	594.025	0.0226219	594.025	-0.00223514	594.025	0.0267798	594.025	0.0049537	594.025	0.0110887	594.025	-0.00556115	594.025	0.0103671	594.025	-0.00464183	594.025	0.00941605	594.025	-0.00155204		594.025	-0.0187226	-0.0166499		594.025	-0.00125857	-0.0118741
592.986	0.00727428	592.986	0.0201896	592.986	0.00101094	592.986	0.0229617	592.986	-0.00227299	592.986	0.027406	592.986	0.00522808	592.986	0.0111396	592.986	-0.00543171	592.986	0.0109365	592.986	-0.00462795	592.986	0.00950526	592.986	-0.00143069		592.986	-0.0191787	-0.0165713		592.986	-0.00171458	-0.0117955
591.947	0.00711579	591.947	0.0205751	591.947	0.00091951	591.947	0.0231133	591.947	-0.00215704	591.947	0.0276314	591.947	0.00504598	591.947	0.0114479	591.947	-0.00559141	591.947	0.0112692	591.947	-0.00474011	591.947	0.00975772	591.947	-0.000705131		591.947	-0.0196556	-0.0170393		591.947	-0.00219152	-0.0122636
591.056	0.00685723	591.056	0.0213055	591.056	0.000984315	591.056	0.0234918	591.056	-0.00204962	591.056	0.027912	591.056	0.00525268	591.056	0.0116335	591.056	-0.00525856	591.056	0.0113652	591.056	-0.00445678	591.056	0.0103865	591.056	-0.000644031		591.056	-0.0203212	-0.016892		591.056	-0.00285712	-0.0121163
590.016	0.00694097	590.016	0.0216262	590.016	0.0008861	590.016	0.0239803	590.016	-0.00207719	590.016	0.0286542	590.016	0.00497064	590.016	0.0118731	590.016	-0.00530791	590.016	0.0117234	590.016	-0.00459106	590.016	0.0103616	590.016	-0.000141418		590.016	-0.0207401	-0.017181		590.016	-0.00327602	-0.0124052
588.976	0.00639282	588.976	0.0224425	588.976	0.000870952	588.976	0.0244609	588.976	-0.00224188	588.976	0.0293577	588.976	0.00509726	588.976	0.0122503	588.976	-0.00535547	588.976	0.0118418	588.976	-0.00457242	588.976	0.0109711	588.976	1.19076e-06		588.976	-0.0215716	-0.0176057		588.976	-0.00410749	-0.0128299
587.935	0.00615202	587.935	0.0230232	587.935	0.000655409	587.935	0.0251132	587.935	-0.00209543	587.935	0.0296271	587.935	0.00473136	587.935	0.0124966	587.935	-0.00543161	587.935	0.0120318	587.935	-0.00432742	587.935	0.0111986	587.935	0.000446581		587.935	-0.0223678	-0.0179282		587.935	-0.00490376	-0.0131524
587.043	0.00589776	587.043	0.0237292	587.043	0.000698732	587.043	0.0254104	587.043	-0.00206714	587.043	0.0303232	587.043	0.00491938	587.043	0.0127111	587.043	-0.00529477	587.043	0.0122018	587.043	-0.00435909	587.043	0.0112509	587.043	0.000791408		587.043	-0.0230305	-0.0180059		587.043	-0.0055664	-0.0132301
586.002	0.00600711	586.002	0.0241134	586.002	0.000915567	586.002	0.0257372	586.002	-0.00207683	586.002	0.0308275	586.002	0.00497839	586.002	0.0130494	586.002	-0.00527687	586.002	0.0124252	586.002	-0.00457124	586.002	0.0116757	586.002	0.00108081		586.002	-0.0231978	-0.0183263		586.002	-0.00573378	-0.0135505
584.961	0.00570412	584.961	0.0248757	584.961	0.000534071	584.961	0.0264469	584.961	-0.00205313	584.961	0.031561	584.961	0.0046308	584.961	0.0135764	584.961	-0.00511665	584.961	0.0125725	584.961	-0.00451334	584.961	0.012153	584.961	0.0015195		584.961	-0.0243416	-0.0186931		584.961	-0.00687753	-0.0139173
584.068	0.00552219	584.068	0.0255178	584.068	0.000845352	584.068	0.0271658	584.068	-0.00227737	584.068	0.0324914	584.068	0.00490034	584.068	0.0141162	584.068	-0.00540288	584.068	0.012496	584.068	-0.00411787	584.068	0.0122812	584.068	0.00175415		584.068	-0.0246725	-0.0195191		584.068	-0.00720841	-0.0147433
583.027	0.00524448	583.027	0.0263587	583.027	0.000453578	583.027	0.0276812	583.027	-0.00195908	583.027	0.0328383	583.027	0.0046184	583.027	0.0142849	583.027	-0.00512176	583.027	0.012829	583.027	-0.00437329	583.027	0.0129264	583.027	0.00232773		583.027	-0.0259051	-0.0194066		583.027	-0.00844102	-0.0146308
581.985	0.00490443	581.985	0.0269891	581.985	0.000768924	581.985	0.0283461	581.985	-0.00227541	581.985	0.0337483	581.985	0.00480757	581.985	0.0148161	581.985	-0.00488245	581.985	0.0129349	581.985	-0.00433085	581.985	0.0132204	581.985	0.00261733		581.985	-0.0262202	-0.0196985		581.985	-0.0087561	-0.0149227
580.942	0.00470872	580.942	0.0278275	580.942	0.000578807	580.942	0.0289673	580.942	-0.00222252	580.942	0.0344204	580.942	0.00477674	580.942	0.0151801	580.942	-0.00521897	580.942	0.013014	580.942	-0.0042557	580.942	0.0135709	580.942	0.00264778		580.942	-0.0272486	-0.0203991		580.942	-0.00978457	-0.0156233
580.049	0.00430773	580.049	0.0283084	580.049	0.00095173	580.049	0.0294664	580.049	-0.00225239	580.049	0.0350647	580.049	0.00478467	580.049	0.0154256	580.049	-0.00515272	580.049	0.0130766	580.049	-0.00408982	580.049	0.0139	580.049	0.00308296		580.049	-0.0273567	-0.0205783		580.049	-0.00989258	-0.0158026
579.006	0.00391924	579.006	0.02911	579.006	0.000779608	579.006	0.0297926	579.006	-0.00227042	579.006	0.0357954	579.006	0.00478098	579.006	0.0155935	579.006	-0.00522193	579.006	0.0131839	579.006	-0.00417638	579.006	0.0141291	579.006	0.00336109		579.006	-0.0283304	-0.0208155		579.006	-0.0108663	-0.0160397
577.963	0.00397504	577.963	0.0297257	577.963	0.000918369	577.963	0.0301198	577.963	-0.00205941	577.963	0.0364339	577.963	0.00471126	577.963	0.0159911	577.963	-0.00486597	577.963	0.013502	577.963	-0.00415818	577.963	0.0144309	577.963	0.00349397		577.963	-0.0288073	-0.0208571		577.963	-0.0113433	-0.0160813
577.069	0.0034092	577.069	0.030217	577.069	0.000980605	577.069	0.030467	577.069	-0.00198619	577.069	0.0368578	577.069	0.00478517	577.069	0.0159789	577.069	-0.00484364	577.069	0.0136248	577.069	-0.00420341	577.069	0.0148287	577.069	0.00375168		577.069	-0.0292364	-0.0208225		577.069	-0.0117723	-0.0160467
576.025	0.00310408	576.025	0.0309312	576.025	0.000797554	576.025	0.0308129	576.025	-0.00199412	576.025	0.0374011	576.025	0.00486731	576.025	0.0163594	576.025	-0.00491793	576.025	0.0139422	576.025	-0.00423745	576.025	0.0149587	576.025	0.00394267		576.025	-0.0301337	-0.0212773		576.025	-0.0126696	-0.0165015
574.981	0.00255775	574.981	0.0314578	574.981	0.000955232	574.981	0.0311568	574.981	-0.00210249	574.981	0.0376804	574.981	0.00477192	574.981	0.0164241	574.981	-0.00457375	574.981	0.0141489	574.981	-0.00414331	574.981	0.0149606	574.981	0.00386758		574.981	-0.0305025	-0.0209978		574.981	-0.0130385	-0.016222
573.937	0.00216087	573.937	0.0320121	573.937	0.00103725	573.937	0.0313983	573.937	-0.00202798	573.937	0.0384469	573.937	0.00506698	573.937	0.0170197	573.937	-0.00453343	573.937	0.0144114	573.937	-0.00406223	573.937	0.0153107	573.937	0.00413375		573.937	-0.0309749	-0.0215532		573.937	-0.0135108	-0.0167774
573.042	0.00212947	573.042	0.0321984	573.042	0.00135886	573.042	0.0315358	573.042	-0.00167609	573.042	0.0387577	573.042	0.00507694	573.042	0.0167135	573.042	-0.0043206	573.042	0.0145663	573.042	-0.00381432	573.042	0.0155393	573.042	0.00428477		573.042	-0.0308396	-0.0210341		573.042	-0.0133755	-0.0162583
571.997	0.001741	571.997	0.0326041	571.997	0.00139747	571.997	0.0314172	571.997	-0.00167408	571.997	0.0389308	571.997	0.00519151	571.997	0.0169699	571.997	-0.0040791	571.997	0.0151398	571.997	-0.00376095	571.997	0.0154587	571.997	0.00408634		571.997	-0.0312066	-0.021049		571.997	-0.0137425	-0.0162732
570.953	0.0013021	570.953	0.0329545	570.953	0.00186278	570.953	0.0315314	570.953	-0.00137392	570.953	0.0393946	570.953	0.00577371	570.953	0.0170304	570.953	-0.00376747	570.953	0.0152686	570.953	-0.00372743	570.953	0.0154259	570.953	0.00402922		570.953	-0.0310917	-0.0207979		570.953	-0.0136276	-0.0160221
570.057	0.000955258	570.057	0.0331463	570.057	0.00273384	570.057	0.0314195	570.057	-0.0009015	570.057	0.0393369	570.057	0.00617554	570.057	0.0172541	570.057	-0.00315257	570.057	0.0156491	570.057	-0.0033016	570.057	0.0155924	570.057	0.00426161		570.057	-0.0304125	-0.0204067		570.057	-0.0129484	-0.0156309
569.011	0.00081856	569.011	0.0335298	569.011	0.00326494	569.011	0.0314759	569.011	-0.000249624	569.011	0.040147	569.011	0.00687356	569.011	0.0170885	569.011	-0.00272448	569.011	0.0157582	569.011	-0.00273816	569.011	0.0155738	569.011	0.00432108		569.011	-0.0302649	-0.019813		569.011	-0.0128008	-0.0150372
567.966	0.000271188	567.966	0.0340312	567.966	0.00435573	567.966	0.0315288	567.966	0.000841799	567.966	0.0403308	567.966	0.00778996	567.966	0.0172766	567.966	-0.001903	567.966	0.0157936	567.966	-0.00197856	567.966	0.0156181	567.966	0.00467895		567.966	-0.0296755	-0.0191796		567.966	-0.0122114	-0.0144038
567.069	0.000246556	567.069	0.0340498	567.069	0.0052804	567.069	0.0316752	567.069	0.00166294	567.069	0.040411	567.069	0.00857968	567.069	0.0171498	567.069	-0.00113284	567.069	0.0160076	567.069	-0.00153089	567.069	0.0158124	567.069	0.00470367		567.069	-0.0287694	-0.0182827		567.069	-0.0113054	-0.0135069
566.023	3.67079e-05	566.023	0.0341207	566.023	0.00677303	566.023	0.031364	566.023	0.0029722	566.023	0.0405127	566.023	0.00995931	566.023	0.0172539	566.023	2.02951e-05	566.023	0.0159556	566.023	-0.000507172	566.023	0.0155537	566.023	0.00488296		566.023	-0.0273477	-0.0172337		566.023	-0.00988363	-0.0124579
564.977	-0.000650906	564.977	0.0345245	564.977	0.00905857	564.977	0.0315235	564.977	0.00538145	564.977	0.0408871	564.977	0.0122123	564.977	0.0170833	564.977	0.00194011	564.977	0.01612	564.977	0.00125531	564.977	0.015767	564.977	0.00607885		564.977	-0.025466	-0.0151432		564.977	-0.00800189	-0.0103674
563.93	-0.000879026	563.93	0.0347272	563.93	0.0119874	563.93	0.031504	563.93	0.0081239	563.93	0.0411808	563.93	0.0148514	563.93	0.0172246	563.93	0.00371973	563.93	0.0162521	563.93	0.00297257	563.93	0.0158106	563.93	0.00735486		563.93	-0.0227399	-0.0135049		563.93	-0.00527578	-0.00872913
563.033	-0.00117333	563.033	0.0352141	563.033	0.0150872	563.033	0.0317942	563.033	0.0108552	563.033	0.0414323	563.033	0.0174873	563.033	0.0175078	563.033	0.00590112	563.033	0.0165113	563.033	0.00501479	563.033	0.016017	563.033	0.00914155		563.033	-0.0201268	-0.0116067		563.033	-0.00266275	-0.00683093
561.985	-0.0013701	561.985	0.0352449	561.985	0.0182063	561.985	0.0319622	561.985	0.0138996	561.985	0.0415648	561.985	0.0204248	561.985	0.0174898	561.985	0.0080119	561.985	0.0167041	561.985	0.00703838	561.985	0.0162018	561.985	0.0105808		561.985	-0.0170386	-0.00947787		561.985	0.000425445	-0.00470209
560.938	-0.00129578	560.938	0.0357235	560.938	0.0227024	560.938	0.031997	560.938	0.0179249	560.938	0.0417434	560.938	0.0246351	560.938	0.0177283	560.938	0.0108898	560.938	0.0166848	560.938	0.00978753	560.938	0.0164114	560.938	0.0127025		560.938	-0.013021	-0.00683852		560.938	0.00444304	-0.00206273
560.04	-0.00151159	560.04	0.0361236	560.04	0.0275527	560.04	0.0323582	560.04	0.0221863	560.04	0.0423766	560.04	0.0288961	560.04	0.0177845	560.04	0.0140037	560.04	0.0169325	560.04	0.0127748	560.04	0.0167211	560.04	0.015369		560.04	-0.00857094	-0.00378081		560.04	0.00889313	0.000994983
558.992	-0.00168991	558.992	0.0365913	558.992	0.0339399	558.992	0.0327011	558.992	0.0280821	558.992	0.0426106	558.992	0.0347527	558.992	0.0182966	558.992	0.0179656	558.992	0.0171856	558.992	0.0166868	558.992	0.0169959	558.992	0.0187264		558.992	-0.00265143	-0.000331026		558.992	0.0148126	0.00444476
557.944	-0.00164617	557.944	0.0368917	557.944	0.0408757	557.944	0.0331997	557.944	0.0340361	557.944	0.0430592	557.944	0.0409287	557.944	0.0185658	557.944	0.0221116	557.944	0.0177028	557.944	0.0204153	557.944	0.0174172	557.944	0.0223492		557.944	0.00398396	0.00354574		557.944	0.021448	0.00832153
557.045	-0.00159485	557.045	0.0376395	557.045	0.0484285	557.045	0.0336869	557.045	0.0408687	557.045	0.043661	557.045	0.0474258	557.045	0.0186238	557.045	0.0264032	557.045	0.0179734	557.045	0.0245994	557.045	0.0179819	557.045	0.0260733		557.045	0.010789	0.00777942		557.045	0.0282531	0.0125552
555.997	-0.00227294	555.997	0.0379399	555.997	0.0586474	555.997	0.0338936	555.997	0.0495037	555.997	0.0441181	555.997	0.0561332	555.997	0.0189176	555.997	0.0315853	555.997	0.0180103	555.997	0.0297212	555.997	0.0182481	555.997	0.0310579		555.997	0.0207075	0.0126677		555.997	0.0381716	0.0174435
554.948	-0.00212881	554.948	0.0388779	554.948	0.0709135	554.948	0.0343528	554.948	0.0602358	554.948	0.0449229	554.948	0.0675623	554.948	0.0191765	554.948	0.0381074	554.948	0.0186894	554.948	0.0358974	554.948	0.0188618	554.948	0.0374303		554.948	0.0320356	0.0189309		554.948	0.0494997	0.0237067
554.048	-0.00186831	554.048	0.0395184	554.048	0.0832755	554.048	0.0353473	554.048	0.0710078	554.048	0.0456343	554.048	0.0784791	554.048	0.0199728	554.048	0.0445066	554.048	0.0191531	554.048	0.0421943	554.048	0.0194018	554.048	0.0435937		554.048	0.0437571	0.0245338		554.048	0.0612212	0.0293095
552.999	-0.00156349	552.999	0.04025	552.999	0.0974863	552.999	0.0358845	552.999	0.0830303	552.999	0.0466253	552.999	0.0909804	552.999	0.0205017	552.999	0.0517992	552.999	0.0196248	552.999	0.0490965	552.999	0.0199239	552.999	0.0504616		552.999	0.0572363	0.0312975		552.999	0.0747003	0.0360733
551.949	-0.00165618	551.949	0.0415742	551.949	0.109493	551.949	0.0368146	551.949	0.0935563	551.949	0.0475804	551.949	0.101833	551.949	0.021278	551.949	0.0580185	551.949	0.0201242	551.949	0.0552582	551.949	0.0207078	551.949	0.0564254		551.949	0.0679191	0.0367405		551.949	0.0853831	0.0415163
551.049	-0.00130337	551.049	0.0426262	551.049	0.118263	551.049	0.0380401	551.049	0.100972	551.049	0.0486954	551.049	0.109444	551.049	0.0221501	551.049	0.0624193	551.049	0.0209848	551.049	0.0595685	551.049	0.0216587	551.049	0.0609793		551.049	0.075637	0.0402692		551.049	0.0931011	0.045045
549.999	-0.000885277	549.999	0.0439337	549.999	0.121345	549.999	0.0390948	549.999	0.103285	549.999	0.0497806	549.999	0.112351	549.999	0.0230759	549.999	0.0641013	549.999	0.0219795	549.999	0.061333	549.999	0.0225558	549.999	0.0627466		549.999	0.0774111	0.0410254		549.999	0.0948752	0.0458012
548.949	-0.000429288	548.949	0.0451328	548.949	0.119509	548.949	0.040297	548.949	0.102041	548.949	0.0511286	548.949	0.111032	548.949	0.0241991	548.949	0.0637681	548.949	0.0229285	548.949	0.060757	548.949	0.0237431	548.949	0.0623063		548.949	0.0743757	0.0395691		548.949	0.0918398	0.0443449
548.048	-0.00027239	548.048	0.0462359	548.048	0.114302	548.048	0.0414919	548.048	0.0976328	548.048	0.0523217	548.048	0.106439	548.048	0.0250189	548.048	0.0613572	548.048	0.0237925	548.048	0.0584508	548.048	0.0247414	548.048	0.0599629		548.048	0.068066	0.0363383		548.048	0.08553	0.0411141
546.997	0.00027383	546.997	0.0477632	546.997	0.103577	546.997	0.0427193	546.997	0.0885824	546.997	0.0536685	546.997	0.0973704	546.997	0.0262269	546.997	0.0564297	546.997	0.0250127	546.997	0.0534299	546.997	0.025778	546.997	0.0553743		546.997	0.0558137	0.0302027		546.997	0.0732778	0.0349785
545.946	0.000690513	545.946	0.0494892	545.946	0.090209	545.946	0.0442961	545.946	0.0773001	545.946	0.0552911	545.946	0.0854355	545.946	0.0274774	545.946	0.0501931	545.946	0.026179	545.946	0.0474639	545.946	0.0271894	545.946	0.0495464		545.946	0.0407197	0.0227156		545.946	0.0581838	0.0274914
545.045	0.00122655	545.045	0.0510293	545.045	0.0795994	545.045	0.0457208	545.045	0.0678708	545.045	0.0568044	545.045	0.0758036	545.045	0.0287473	545.045	0.0451886	545.045	0.0275894	545.045	0.0427943	545.045	0.0283248	545.045	0.0448731		545.045	0.0285701	0.0164413		545.045	0.0460342	0.0212171
543.993	0.00176294	543.993	0.0523897	543.993	0.0695563	543.993	0.0469883	543.993	0.0594194	543.993	0.0581621	543.993	0.0672143	543.993	0.0299487	543.993	0.0407885	543.993	0.0286484	543.993	0.0384687	543.993	0.0294991	543.993	0.040781		543.993	0.0171666	0.0108397		543.993	0.0346307	0.0156155
542.941	0.0024149	542.941	0.0540907	542.941	0.062294	542.941	0.048575	542.941	0.0533305	542.941	0.0599347	542.941	0.0606448	542.941	0.0311439	542.941	0.0376678	542.941	0.0299866	542.941	0.0355391	542.941	0.031045	542.941	0.0379118		542.941	0.00820327	0.00652389		542.941	0.0256673	0.0112997
542.039	0.00312859	542.039	0.0554751	542.039	0.0566561	542.039	0.0500095	542.039	0.0484592	542.039	0.0613059	542.039	0.0560018	542.039	0.032522	542.039	0.0355623	542.039	0.0311367	542.039	0.033379	542.039	0.0320868	542.039	0.0358306		542.039	0.00118098	0.00304029		542.039	0.0186451	0.00781608
540.987	0.00301854	540.987	0.0563992	540.987	0.0512707	540.987	0.0506431	540.987	0.0442122	540.987	0.0618835	540.987	0.0511535	540.987	0.0331308	540.987	0.0332915	540.987	0.0315424	540.987	0.0311537	540.987	0.0327282	540.987	0.0334471		540.987	-0.00512849	0.000160646		540.987	0.0123356	0.00493643
539.934	0.00398776	539.934	0.0582794	539.934	0.049127	539.934	0.052246	539.934	0.0423476	539.934	0.0637881	539.934	0.0493282	539.934	0.0346715	539.934	0.0329598	539.934	0.0332431	539.934	0.0308687	539.934	0.0344466	539.934	0.0331524		539.934	-0.00915236	-0.00171175		539.934	0.00831171	0.00306404
539.032	0.00464475	539.032	0.0598116	539.032	0.0478048	539.032	0.053954	539.032	0.0414651	539.032	0.0655186	539.032	0.0481887	539.032	0.035851	539.032	0.0329197	539.032	0.0344942	539.032	0.030945	539.032	0.0356699	539.032	0.0333448		539.032	-0.0120068	-0.00293138		539.032	0.00545723	0.00184441
537.979	0.00520102	537.979	0.0611284	537.979	0.046915	537.979	0.055335	537.979	0.0408063	537.979	0.0670707	537.979	0.0474871	537.979	0.0369439	537.979	0.0333098	537.979	0.0358435	537.979	0.0313554	537.979	0.0368302	537.979	0.0337225		537.979	-0.0142134	-0.0036341		537.979	0.00325063	0.00114169
536.925	0.00599249	536.925	0.0621056	536.925	0.046171	536.925	0.0563497	536.925	0.0403728	536.925	0.067938	536.925	0.0470858	536.925	0.0379478	536.925	0.0335534	536.925	0.0367927	536.925	0.0316808	536.925	0.0379587	536.925	0.0340997		536.925	-0.0159346	-0.0043944		536.925	0.00152947	0.000381388
536.022	0.00634575	536.022	0.0630564	536.022	0.0460516	536.022	0.0573456	536.022	0.0405047	536.022	0.0689488	536.022	0.0471975	536.022	0.0389337	536.022	0.034228	536.022	0.0376135	536.022	0.0321364	536.022	0.0389604	536.022	0.0346567		536.022	-0.0170048	-0.0047057		536.022	0.000459251	7.00843e-05
534.969	0.00684505	534.969	0.0646669	534.969	0.0472028	534.969	0.0589835	534.969	0.0415135	534.969	0.0704468	534.969	0.0483659	534.969	0.0403581	534.969	0.0355823	534.969	0.0389714	534.969	0.0338015	534.969	0.0403446	534.969	0.0361083		534.969	-0.0174641	-0.00477579		534.969	4.9e-10	3.6e-10
534.065	0.00746337	534.065	0.0652647	534.065	0.0482822	534.065	0.0597563	534.065	0.0427644	534.065	0.0711311	534.065	0.0495718	534.065	0.0410498	534.065	0.0367582	534.065	0.0397721	534.065	0.0348284	534.065	0.0410131	534.065	0.0372799		534.065	-0.0169825	-0.00429164		534.065	0.000481535	0.000484154
533.011	0.00770516	533.011	0.0658892	533.011	0.0495207	533.011	0.0601352	533.011	0.0438848	533.011	0.0715978	533.011	0.0505881	533.011	0.0414999	533.011	0.0380754	533.011	0.0398143	533.011	0.036196	533.011	0.0416029	533.011	0.0382621		533.011	-0.0163685	-0.00342445		533.011	0.0010956	0.00135134
531.956	0.00849795	531.956	0.0670564	531.956	0.052416	531.956	0.0615208	531.956	0.0465966	531.956	0.0727609	531.956	0.0534541	531.956	0.0429465	531.956	0.0403892	531.956	0.041091	531.956	0.0383876	531.956	0.0427853	531.956	0.0406288		531.956	-0.0146404	-0.00255735		531.956	0.00282367	0.00221844
531.052	0.00882928	531.052	0.0678537	531.052	0.0552393	531.052	0.0623829	531.052	0.049427	531.052	0.0736547	531.052	0.056291	531.052	0.0437509	531.052	0.0427396	531.052	0.0420662	531.052	0.0406148	531.052	0.0436825	531.052	0.0428882		531.052	-0.0126143	-0.00101139		531.052	0.00484974	0.0037644
529.997	0.00934309	529.997	0.0686774	529.997	0.0590738	529.997	0.0633383	529.997	0.0528536	529.997	0.0745465	529.997	0.0596881	529.997	0.0447261	529.997	0.0452771	529.997	0.0430092	529.997	0.0433538	529.997	0.0447679	529.997	0.045635		529.997	-0.00960366	0.000551041		529.997	0.00786041	0.00532683
528.942	0.0104819	528.942	0.0695552	528.942	0.0629119	528.942	0.0643747	528.942	0.0562217	528.942	0.0756358	528.942	0.06339	528.942	0.0457497	528.942	0.0482785	528.942	0.0436881	528.942	0.0461944	528.942	0.0458564	528.942	0.0483809		528.942	-0.00664326	0.0025288		528.942	0.0108208	0.00730459
528.037	0.00985989	528.037	0.0689969	528.037	0.0644727	528.037	0.0641422	528.037	0.0569648	528.037	0.0744504	528.037	0.0645399	528.037	0.0454973	528.037	0.0489336	528.037	0.0430324	528.037	0.0469825	528.037	0.04552	528.037	0.0487621		528.037	-0.00452422	0.00343636		528.037	0.0129399	0.00821215
526.981	0.0108014	526.981	0.0704458	526.981	0.0693287	526.981	0.0656162	526.981	0.0617956	526.981	0.0762296	526.981	0.0692345	526.981	0.047118	526.981	0.0527753	526.981	0.0448846	526.981	0.0506031	526.981	0.0469861	526.981	0.0526107		526.981	-0.00111713	0.00565729		526.981	0.0163469	0.0104331
525.925	0.0114438	525.925	0.0709732	525.925	0.0726195	525.925	0.0664247	525.925	0.0646979	525.925	0.0771254	525.925	0.0723436	525.925	0.0479374	525.925	0.0552461	525.925	0.0456558	525.925	0.0529674	525.925	0.0480224	525.925	0.0549992		525.925	0.00164632	0.00730876		525.925	0.0191104	0.0120845
525.02	0.0115098	525.02	0.0713874	525.02	0.0754077	525.02	0.0672302	525.02	0.0673231	525.02	0.0772	525.02	0.0748138	525.02	0.0487013	525.02	0.0572708	525.02	0.0461182	525.02	0.0549845	525.02	0.0486413	525.02	0.0569541		525.02	0.00402024	0.00856945		525.02	0.0214843	0.0133452
523.964	0.0120607	523.964	0.072249	523.964	0.0805945	523.964	0.0683077	523.964	0.0717997	523.964	0.0782188	523.964	0.0795799	523.964	0.0497566	523.964	0.0604937	523.964	0.0472152	523.964	0.0581723	523.964	0.0496625	523.964	0.0600612		523.964	0.0083455	0.0107372		523.964	0.0258096	0.015513
523.058	0.0123558	523.058	0.0726523	523.058	0.0855268	523.058	0.0689412	523.058	0.0757771	523.058	0.079049	523.058	0.0839291	523.058	0.0504791	523.058	0.0635194	523.058	0.0480507	523.058	0.0612014	523.058	0.0504248	523.058	0.0629877		523.058	0.0128745	0.0130403		523.058	0.0303386	0.0178161
522.001	0.0130291	522.001	0.0733117	522.001	0.090463	522.001	0.0698556	522.001	0.080275	522.001	0.0796457	522.001	0.0882806	522.001	0.0515603	522.001	0.0666137	522.001	0.04925	522.001	0.0643085	522.001	0.0514107	522.001	0.0662634		522.001	0.0171513	0.0150534		522.001	0.0346154	0.0198292
520.944	0.0132347	520.944	0.0739592	520.944	0.093284	520.944	0.0708151	520.944	0.0826964	520.944	0.0805747	520.944	0.0910694	520.944	0.0524735	520.944	0.0686458	520.944	0.0501801	520.944	0.066285	520.944	0.052324	520.944	0.0682453		520.944	0.0193248	0.0161723		520.944	0.0367889	0.0209481
520.037	0.0132724	520.037	0.0744459	520.037	0.0939262	520.037	0.0712906	520.037	0.083181	520.037	0.0809413	520.037	0.0919763	520.037	0.0531102	520.037	0.0695085	520.037	0.0508429	520.037	0.0673925	520.037	0.0530955	520.037	0.0691655		520.037	0.0194803	0.0163983		520.037	0.0369444	0.0211741
518.98	0.0136841	518.98	0.075109	518.98	0.0936917	518.98	0.0718796	518.98	0.0830643	518.98	0.081788	518.98	0.0918608	518.98	0.0539749	518.98	0.0697517	518.98	0.0516828	518.98	0.0676259	518.98	0.0538338	518.98	0.0695258		518.98	0.0185827	0.0157768		518.98	0.0360467	0.0205526
518.073	0.0136735	518.073	0.0754353	518.073	0.0922324	518.073	0.0725975	518.073	0.0813122	518.073	0.082163	518.073	0.0903124	518.073	0.0544001	518.073	0.069516	518.073	0.0523245	518.073	0.0672976	518.073	0.0547317	518.073	0.069249		518.073	0.016797	0.0151159		518.073	0.0342611	0.0198917
517.015	0.0142565	517.015	0.0763538	517.015	0.0899789	517.015	0.0733568	517.015	0.0793577	517.015	0.0828101	517.015	0.0882297	517.015	0.0556482	517.015	0.0691462	517.015	0.0534477	517.015	0.0670786	517.015	0.0555956	517.015	0.0688572		517.015	0.0136251	0.0134981		517.015	0.0310892	0.0182739
515.957	0.0140741	515.957	0.0770533	515.957	0.0883342	515.957	0.0743035	515.957	0.078091	515.957	0.0839765	515.957	0.0868074	515.957	0.0566443	515.957	0.0684997	515.957	0.0546545	515.957	0.0667844	515.957	0.0567966	515.957	0.0686639		515.957	0.0112809	0.0118554		515.957	0.028745	0.0166312
515.049	0.0147599	515.049	0.0778732	515.049	0.0871072	515.049	0.075266	515.049	0.0771129	515.049	0.0849671	515.049	0.0859481	515.049	0.0576805	515.049	0.0687723	515.049	0.0556075	515.049	0.0668237	515.049	0.0579425	515.049	0.0686921		515.049	0.00923392	0.0110918		515.049	0.026698	0.0158676
513.991	0.014585	513.991	0.0784497	513.991	0.0851991	513.991	0.0757087	513.991	0.0754069	513.991	0.0853977	513.991	0.0842073	513.991	0.0581724	513.991	0.0679804	513.991	0.0563315	513.991	0.0664342	513.991	0.0584341	513.991	0.0682699		513.991	0.00674931	0.00980796		513.991	0.0242134	0.0145838
512.932	0.0146792	512.932	0.0791364	512.932	0.0838814	512.932	0.0763742	512.932	0.0742752	512.932	0.0863862	512.932	0.082835	512.932	0.0591584	512.932	0.0677181	512.932	0.0575647	512.932	0.0660913	512.932	0.0594923	512.932	0.0682212		512.932	0.00474504	0.00855965		512.932	0.0222091	0.0133354
512.024	0.0146739	512.024	0.0797742	512.024	0.0824584	512.024	0.0769892	512.024	0.0731242	512.024	0.0872803	512.024	0.0819028	512.024	0.0601317	512.024	0.0673188	512.024	0.0585828	512.024	0.0659404	512.024	0.0605649	512.024	0.0681488		512.024	0.00268423	0.00718714		512.024	0.0201483	0.0119629
510.964	0.01472	510.964	0.0806843	510.964	0.0814034	510.964	0.0781364	510.964	0.0719465	510.964	0.088088	510.964	0.0807063	510.964	0.0612721	510.964	0.0672266	510.964	0.0594424	510.964	0.0656994	510.964	0.0616604	510.964	0.0680993		510.964	0.000719115	0.0059545		510.964	0.0181832	0.0107303
510.056	0.0148082	510.056	0.0811907	510.056	0.0803301	510.056	0.0785877	510.056	0.0706796	510.056	0.0887509	510.056	0.079791	510.056	0.062196	510.056	0.0668057	510.056	0.0603532	510.056	0.065583	510.056	0.0625845	510.056	0.0678028		510.056	-0.000860624	0.00460975		510.056	0.0166034	0.00938554
508.996	0.0148404	508.996	0.0821228	508.996	0.0788395	508.996	0.0792875	508.996	0.0696976	508.996	0.0896951	508.996	0.0784893	508.996	0.0630824	508.996	0.066629	508.996	0.0613769	508.996	0.0653227	508.996	0.0634785	508.996	0.0677853		508.996	-0.00328336	0.00354654		508.996	0.0141807	0.00832233
507.936	0.015209	507.936	0.083406	507.936	0.0769545	507.936	0.0807991	507.936	0.0681465	507.936	0.0910421	507.936	0.0771446	507.936	0.0644885	507.936	0.0663025	507.936	0.0629217	507.936	0.0652708	507.936	0.0650062	507.936	0.0677175		507.936	-0.00645145	0.00181398		507.936	0.0110126	0.00658977
507.027	0.0146233	507.027	0.0841039	507.027	0.074591	507.027	0.0811602	507.027	0.0660189	507.027	0.091796	507.027	0.0751005	507.027	0.0651913	507.027	0.0652722	507.027	0.0635341	507.027	0.0642755	507.027	0.0656539	507.027	0.0668851		507.027	-0.00951282	8.08612e-05		507.027	0.00795125	0.00485665
505.967	0.0146412	505.967	0.0850849	505.967	0.0727024	505.967	0.0822487	505.967	0.0643998	505.967	0.0931251	505.967	0.0731189	505.967	0.0665953	505.967	0.0647712	505.967	0.0648392	505.967	0.0637522	505.967	0.0668537	505.967	0.0663231		505.967	-0.0123825	-0.00182413		505.967	0.00508157	0.00295166
505.057	0.0145495	505.057	0.0858391	505.057	0.0710898	505.057	0.0830624	505.057	0.0630374	505.057	0.0939743	505.057	0.071896	505.057	0.0675512	505.057	0.0641112	505.057	0.0659011	505.057	0.0633614	505.057	0.0680243	505.057	0.0660896		505.057	-0.0147493	-0.00344002		505.057	0.00271478	0.00133577
503.996	0.0144036	503.996	0.0869525	503.996	0.0691615	503.996	0.0839678	503.996	0.061542	503.996	0.0949373	503.996	0.0701974	503.996	0.0684361	503.996	0.0635558	503.996	0.0671387	503.996	0.0626315	503.996	0.0693393	503.996	0.0655766		503.996	-0.0177909	-0.00488036		503.996	-0.000326871	-0.000104572
502.935	0.0140347	502.935	0.0883957	502.935	0.0674147	502.935	0.0850658	502.935	0.0598476	502.935	0.0964102	502.935	0.0687119	502.935	0.0698748	502.935	0.0629339	502.935	0.0682767	502.935	0.0623193	502.935	0.0704375	502.935	0.0652122		502.935	-0.020981	-0.00694085		502.935	-0.00351688	-0.00216506
502.025	0.014072	502.025	0.0891879	502.025	0.0662016	502.025	0.0861288	502.025	0.0588014	502.025	0.0974241	502.025	0.0675942	502.025	0.0710713	502.025	0.0625948	502.025	0.0693543	502.025	0.0618549	502.025	0.0716347	502.025	0.0649154		502.025	-0.0229863	-0.00847653		502.025	-0.00552224	-0.00370074
500.963	0.0140866	500.963	0.090755	500.963	0.0646583	500.963	0.0874727	500.963	0.0576479	500.963	0.0990296	500.963	0.0665551	500.963	0.0724284	500.963	0.062184	500.963	0.0710989	500.963	0.0615647	500.963	0.0734766	500.963	0.0647614		500.963	-0.0260966	-0.0102444		500.963	-0.00863258	-0.00546863
500.053	0.0136775	500.053	0.0921694	500.053	0.0639242	500.053	0.0886614	500.053	0.0570205	500.053	0.100426	500.053	0.0656654	500.053	0.0738887	500.053	0.0618816	500.053	0.0722751	500.053	0.0614413	500.053	0.0746667	500.053	0.0648037		500.053	-0.0282452	-0.0120071		500.053	-0.0107811	-0.00723129
498.991	0.0133583	498.991	0.0936021	498.991	0.0632334	498.991	0.0900495	498.991	0.0564921	498.991	0.102008	498.991	0.065195	498.991	0.0753196	498.991	0.0619397	498.991	0.0739983	498.991	0.0613926	498.991	0.0763019	498.991	0.0648101		498.991	-0.0303687	-0.0133799		498.991	-0.0129046	-0.00860415
497.929	0.0131222	497.929	0.0953837	497.929	0.0629098	497.929	0.0915967	497.929	0.056265	497.929	0.103899	497.929	0.0647711	497.929	0.0772611	497.929	0.0617771	497.929	0.0759005	497.929	0.0612716	497.929	0.0780634	497.929	0.0650493		497.929	-0.0324739	-0.015484		497.929	-0.0150099	-0.0107082
497.018	0.0129086	497.018	0.0965222	497.018	0.0625129	497.018	0.0926845	497.018	0.0561676	497.018	0.105019	497.018	0.0644831	497.018	0.0785314	497.018	0.0618631	497.018	0.077012	497.018	0.0613312	497.018	0.0793092	497.018	0.0653446		497.018	-0.0340093	-0.0166683		497.018	-0.0165452	-0.0118925
495.955	0.0128578	495.955	0.098544	495.955	0.0625797	495.955	0.0941583	495.955	0.0561148	495.955	0.107061	495.955	0.0646239	495.955	0.0803754	495.955	0.0621604	495.955	0.0788795	495.955	0.0614399	495.955	0.0811901	495.955	0.0657577		495.955	-0.0359643	-0.018215		495.955	-0.0185003	-0.0134392
495.044	0.0127533	495.044	0.10048	495.044	0.0628793	495.044	0.0960708	495.044	0.0566199	495.044	0.109044	495.044	0.0650701	495.044	0.0825085	495.044	0.0626118	495.044	0.0809291	495.044	0.0619618	495.044	0.0831453	495.044	0.06632		495.044	-0.0376008	-0.0198967		495.044	-0.0201367	-0.0151209
493.981	0.0127535	493.981	0.103036	493.981	0.0633792	493.981	0.0983033	493.981	0.0571832	493.981	0.111636	493.981	0.0656484	493.981	0.0849928	493.981	0.0632172	493.981	0.0834403	493.981	0.0627164	493.981	0.0858366	493.981	0.06723		493.981	-0.0396569	-0.0217756		493.981	-0.0221928	-0.0169998
493.069	0.0128855	493.069	0.105872	493.069	0.0642064	493.069	0.101219	493.069	0.0581933	493.069	0.114579	493.069	0.0667237	493.069	0.0878214	493.069	0.0642998	493.069	0.0863518	493.069	0.0636605	493.069	0.0885908	493.069	0.0685164		493.069	-0.0416658	-0.0235217		493.069	-0.0242017	-0.0187459
492.005	0.0128899	492.005	0.107808	492.005	0.0646117	492.005	0.103062	492.005	0.0586309	492.005	0.116647	492.005	0.0670119	492.005	0.0898565	492.005	0.0645224	492.005	0.088295	492.005	0.0637813	492.005	0.0906104	492.005	0.0688698		492.005	-0.0431961	-0.0253341		492.005	-0.025732	-0.0205583
490.942	0.012892	490.942	0.110137	490.942	0.0648287	490.942	0.104842	490.942	0.0588827	490.942	0.118911	490.942	0.0673437	490.942	0.0923481	490.942	0.0647535	490.942	0.0904903	490.942	0.0641397	490.942	0.0928083	490.942	0.0694228		490.942	-0.0453085	-0.0275946		490.942	-0.0278444	-0.0228188
490.029	0.0131075	490.029	0.113224	490.029	0.0659739	490.029	0.108047	490.029	0.0601334	490.029	0.121831	490.029	0.0684437	490.029	0.0953983	490.029	0.0658903	490.029	0.0935412	490.029	0.065297	490.029	0.0958167	490.029	0.0706827		490.029	-0.0472504	-0.029508		490.029	-0.0297863	-0.0247322
488.965	0.0136932	488.965	0.117224	488.965	0.0675049	488.965	0.112098	488.965	0.0616012	488.965	0.126226	488.965	0.0699789	488.965	0.09922	488.965	0.0672682	488.965	0.0977316	488.965	0.0667695	488.965	0.0998715	488.965	0.0723109		488.965	-0.0497195	-0.0319518		488.965	-0.0322554	-0.027176
488.053	0.0138849	488.053	0.12049	488.053	0.0682638	488.053	0.115076	488.053	0.0624405	488.053	0.129468	488.053	0.0707342	488.053	0.102652	488.053	0.0680033	488.053	0.100882	488.053	0.0673371	488.053	0.102981	488.053	0.0732648		488.053	-0.0522261	-0.0346483		488.053	-0.034762	-0.0298726
486.988	0.0141984	486.988	0.124223	486.988	0.0690036	486.988	0.118536	486.988	0.063363	486.988	0.1329	486.988	0.071558	486.988	0.106464	486.988	0.0687195	486.988	0.104576	486.988	0.068208	486.988	0.106389	486.988	0.0743495		486.988	-0.0552195	-0.0377445		486.988	-0.0377554	-0.0329687
486.075	0.0146059	486.075	0.127614	486.075	0.0702881	486.075	0.122105	486.075	0.0646519	486.075	0.136317	486.075	0.0727664	486.075	0.109788	486.075	0.0698413	486.075	0.108032	486.075	0.0694656	486.075	0.109889	486.075	0.0756699		486.075	-0.057326	-0.0399468		486.075	-0.039862	-0.035171
485.01	0.01543	485.01	0.132767	485.01	0.0720161	485.01	0.127203	485.01	0.0661274	485.01	0.141654	485.01	0.0744338	485.01	0.114784	485.01	0.071351	485.01	0.113084	485.01	0.0710317	485.01	0.114968	485.01	0.0774844		485.01	-0.0607509	-0.0434334		485.01	-0.0432868	-0.0386576
483.944	0.0158899	483.944	0.137081	483.944	0.072754	483.944	0.131559	483.944	0.0668746	483.944	0.146097	483.944	0.0754088	483.944	0.119246	483.944	0.0720595	483.944	0.117466	483.944	0.0717446	483.944	0.119104	483.944	0.0784374		483.944	-0.0643273	-0.0471861		483.944	-0.0468632	-0.0424103
483.031	0.0160196	483.031	0.142398	483.031	0.0736263	483.031	0.136481	483.031	0.0680085	483.031	0.15112	483.031	0.0763618	483.031	0.124782	483.031	0.073032	483.031	0.122606	483.031	0.0727149	483.031	0.124267	483.031	0.0797131		483.031	-0.0687715	-0.0517495		483.031	-0.0513074	-0.0469738
481.965	0.0164336	481.965	0.148679	481.965	0.075164	481.965	0.142788	481.965	0.0693091	481.965	0.157326	481.965	0.077743	481.965	0.131135	481.965	0.0741458	481.965	0.128982	481.965	0.0740831	481.965	0.130483	481.965	0.0812292		481.965	-0.0735154	-0.0569891		481.965	-0.0560514	-0.0522133
481.051	0.0172577	481.051	0.154468	481.051	0.0765907	481.051	0.148676	481.051	0.0707075	481.051	0.163106	481.051	0.0790966	481.051	0.136688	481.051	0.0755446	481.051	0.134592	481.051	0.0755252	481.051	0.135824	481.051	0.0828126		481.051	-0.0778777	-0.0611436		481.051	-0.0604136	-0.0563678
479.985	0.018185	479.985	0.161269	479.985	0.0779542	479.985	0.155415	479.985	0.0720725	479.985	0.169849	479.985	0.0806217	479.985	0.143512	479.985	0.0768187	479.985	0.141391	479.985	0.0769014	479.985	0.142399	479.985	0.0841977		479.985	-0.0833148	-0.0666937		479.985	-0.0658508	-0.0619179
479.071	0.0186233	479.071	0.168912	479.071	0.0791879	479.071	0.162879	479.071	0.0731866	479.071	0.1775	479.071	0.0819671	479.071	0.151145	479.071	0.0781171	479.071	0.148971	479.071	0.078112	479.071	0.149572	479.071	0.0856567		479.071	-0.0897242	-0.073028		479.071	-0.0722601	-0.0682522
478.004	0.0192839	478.004	0.179432	478.004	0.0808326	478.004	0.173286	478.004	0.0748862	478.004	0.187707	478.004	0.0833648	478.004	0.161696	478.004	0.0795713	478.004	0.159456	478.004	0.0795219	478.004	0.159678	478.004	0.0872703		478.004	-0.0985997	-0.0821247		478.004	-0.0811356	-0.0773489
476.937	0.0199462	476.937	0.189443	476.937	0.0820389	476.937	0.18335	476.937	0.0760153	476.937	0.197844	476.937	0.084675	476.937	0.172232	476.937	0.0806729	476.937	0.169705	476.937	0.0810195	476.937	0.169464	476.937	0.0888351		476.937	-0.107404	-0.0915594		476.937	-0.0899396	-0.0867836
476.023	0.0204342	476.023	0.200126	476.023	0.0830711	476.023	0.193398	476.023	0.077112	476.023	0.20779	476.023	0.0857915	476.023	0.182862	476.023	0.0817333	476.023	0.180004	476.023	0.0818721	476.023	0.179368	476.023	0.0899268		476.023	-0.117055	-0.101129		476.023	-0.0995913	-0.0963529
474.955	0.0209835	474.955	0.211335	474.955	0.0841817	474.955	0.204606	474.955	0.0781742	474.955	0.218967	474.955	0.0870504	474.955	0.194075	474.955	0.0826661	474.955	0.19108	474.955	0.0830102	474.955	0.189895	474.955	0.0911515		474.955	-0.127154	-0.111409		474.955	-0.109689	-0.106633
474.04	0.0214426	474.04	0.223332	474.04	0.084842	474.04	0.216484	474.04	0.0791194	474.04	0.230201	474.04	0.0879653	474.04	0.206496	474.04	0.0835599	474.04	0.202959	474.04	0.0841797	474.04	0.201297	474.04	0.0922088		474.04	-0.13849	-0.122936		474.04	-0.121026	-0.118161
472.973	0.0219925	472.973	0.242386	472.973	0.0862928	472.973	0.235717	472.973	0.0801151	472.973	0.249742	472.973	0.0890845	472.973	0.225889	472.973	0.0847333	472.973	0.222259	472.973	0.0852534	472.973	0.219281	472.973	0.0935101		472.973	-0.156093	-0.141155		472.973	-0.138629	-0.136379
472.057	0.0222454	472.057	0.259766	472.057	0.0871416	472.057	0.252254	472.057	0.0810866	472.057	0.266001	472.057	0.08994	472.057	0.243359	472.057	0.0854973	472.057	0.239483	472.057	0.0861819	472.057	0.23566	472.057	0.0945823		472.057	-0.172624	-0.157861		472.057	-0.15516	-0.153086
470.989	0.0229203	470.989	0.281116	470.989	0.0880063	470.989	0.273477	470.989	0.081711	470.989	0.28657	470.989	0.0910945	470.989	0.265525	470.989	0.0862255	470.989	0.260782	470.989	0.0870358	470.989	0.255661	470.989	0.0955082		470.989	-0.19311	-0.1793		470.989	-0.175646	-0.174524
470.073	0.0230768	470.073	0.299036	470.073	0.0886399	470.073	0.291454	470.073	0.0824884	470.073	0.304145	470.073	0.0915988	470.073	0.28393	470.073	0.0869258	470.073	0.278211	470.073	0.0879513	470.073	0.272587	470.073	0.0962383		470.073	-0.210396	-0.197005		470.073	-0.192932	-0.192229
469.005	0.0235924	469.005	0.326876	469.005	0.0893581	469.005	0.31873	469.005	0.0832197	469.005	0.331336	469.005	0.092624	469.005	0.312733	469.005	0.0877138	469.005	0.305799	469.005	0.0887458	469.005	0.298675	469.005	0.0970906		469.005	-0.237518	-0.225019		469.005	-0.220054	-0.220243
467.936	0.0241209	467.936	0.360138	467.936	0.0899631	467.936	0.350831	467.936	0.0839077	467.936	0.361757	467.936	0.0931403	467.936	0.346295	467.936	0.0884249	467.936	0.338025	467.936	0.0895448	467.936	0.329341	467.936	0.0981066		467.936	-0.270175	-0.25787		467.936	-0.252711	-0.253094
467.02	0.024554	467.02	0.392684	467.02	0.0903279	467.02	0.383802	467.02	0.0844483	467.02	0.394324	467.02	0.0937302	467.02	0.380364	467.02	0.0890437	467.02	0.371208	467.02	0.0901296	467.02	0.360377	467.02	0.0985921		467.02	-0.302357	-0.29132		467.02	-0.284892	-0.286545
465.95	0.0247454	465.95	0.433205	465.95	0.0911731	465.95	0.422622	465.95	0.0849418	465.95	0.432476	465.95	0.0943456	465.95	0.421641	465.95	0.0895731	465.95	0.411073	465.95	0.090774	465.95	0.398021	465.95	0.0994895		465.95	-0.342032	-0.332068		465.95	-0.324568	-0.327292
465.034	0.0249723	465.034	0.471878	465.034	0.0915968	465.034	0.459489	465.034	0.0853463	465.034	0.470037	465.034	0.0947671	465.034	0.459631	465.034	0.0900274	465.034	0.448761	465.034	0.0914778	465.034	0.434203	465.034	0.0998618		465.034	-0.380281	-0.369604		465.034	-0.362817	-0.364828
463.964	0.0254562	463.964	0.52338	463.964	0.0924118	463.964	0.511592	463.964	0.0860749	463.964	0.517959	463.964	0.0955703	463.964	0.513529	463.964	0.0905075	463.964	0.499385	463.964	0.0922502	463.964	0.482175	463.964	0.100729		463.964	-0.430968	-0.423022		463.964	-0.413504	-0.418246
463.047	0.0256	463.047	0.570734	463.047	0.0930435	463.047	0.556259	463.047	0.0867914	463.047	0.562482	463.047	0.0962833	463.047	0.559751	463.047	0.0910897	463.047	0.545198	463.047	0.0927362	463.047	0.52563	463.047	0.101458		463.047	-0.47769	-0.468662		463.047	-0.460226	-0.463886
461.977	0.0261568	461.977	0.638555	461.977	0.0938885	461.977	0.622517	461.977	0.0875476	461.977	0.627625	461.977	0.0972136	461.977	0.631086	461.977	0.0919689	461.977	0.612114	461.977	0.0936324	461.977	0.589436	461.977	0.102459		461.977	-0.544666	-0.539117		461.977	-0.527202	-0.534341
461.06	0.0264907	461.06	0.707256	461.06	0.0952812	461.06	0.691189	461.06	0.0887981	461.06	0.692849	461.06	0.0986315	461.06	0.700778	461.06	0.0927988	461.06	0.680132	461.06	0.0947013	461.06	0.653185	461.06	0.103803		461.06	-0.611975	-0.607979		461.06	-0.59451	-0.603203
459.989	0.0265912	459.989	0.780225	459.989	0.0959432	459.989	0.760901	459.989	0.089404	459.989	0.761721	459.989	0.0992445	459.989	0.776637	459.989	0.0932378	459.989	0.75215	459.989	0.0952511	459.989	0.720699	459.989	0.104214		459.989	-0.684282	-0.683399		459.989	-0.666818	-0.678623
459.072	0.0263673	459.072	0.855748	459.072	0.0961305	459.072	0.835381	459.072	0.0895112	459.072	0.834193	459.072	0.0992912	459.072	0.854032	459.072	0.0932776	459.072	0.82652	459.072	0.095393	459.072	0.791574	459.072	0.104256		459.072	-0.759617	-0.760754		459.072	-0.742153	-0.755978
458.001	0.0268948	458.001	0.956721	458.001	0.09763	458.001	0.931786	458.001	0.0907671	458.001	0.928491	458.001	0.100928	458.001	0.956515	458.001	0.0942671	458.001	0.924779	458.001	0.0965607	458.001	0.884546	458.001	0.105602		458.001	-0.859091	-0.862248		458.001	-0.841627	-0.857472
456.93	0.0270278	456.93	1.0653	456.93	0.0990993	456.93	1.0367	456.93	0.0922861	456.93	1.02973	456.93	0.102078	456.93	1.0665	456.93	0.095047	456.93	1.03253	456.93	0.0974887	456.93	0.98658	456.93	0.106804		456.93	-0.9662	-0.971452		456.93	-0.948736	-0.966676
456.012	0.0272485	456.012	1.18534	456.012	0.100457	456.012	1.15547	456.012	0.0935259	456.012	1.14059	456.012	0.103385	456.012	1.18926	456.012	0.095864	456.012	1.1457	456.012	0.0984632	456.012	1.0955	456.012	0.107905		456.012	-1.08489	-1.0934		456.012	-1.06742	-1.08862
454.94	0.027553	454.94	1.31498	454.94	0.102147	454.94	1.27977	454.94	0.094767	454.94	1.26532	454.94	0.104931	454.94	1.32497	454.94	0.0968782	454.94	1.27465	454.94	0.0993626	454.94	1.21579	454.94	0.10901		454.94	-1.21283	-1.22809		454.94	-1.19537	-1.22331
454.022	0.0277666	454.022	1.47097	454.022	0.103902	454.022	1.42701	454.022	0.0963909	454.022	1.40769	454.022	0.106556	454.022	1.48197	454.022	0.097541	454.022	1.42764	454.022	0.100504	454.022	1.35621	454.022	0.110312		454.022	-1.36707	-1.38443		454.022	-1.34961	-1.37965
452.95	0.0277521	452.95	1.61783	452.95	0.10548	452.95	1.57446	452.95	0.0978428	452.95	1.54166	452.95	0.107978	452.95	1.62686	452.95	0.0986482	452.95	1.56423	452.95	0.101514	452.95	1.48387	452.95	0.111245		452.95	-1.51235	-1.52821		452.95	-1.49489	-1.52344
452.031	0.0278925	452.031	1.74371	452.031	0.106872	452.031	1.69664	452.031	0.0992119	452.031	1.67042	452.031	0.109296	452.031	1.76362	452.031	0.0991519	452.031	1.69642	452.031	0.102288	452.031	1.61594	452.031	0.11229		452.031	-1.63683	-1.66447		452.031	-1.61937	-1.6597
450.959	0.0281361	450.959	1.95122	450.959	0.109343	450.959	1.88566	450.959	0.101232	450.959	1.84494	450.959	0.1116	450.959	1.96088	450.959	0.100349	450.959	1.87263	450.959	0.103892	450.959	1.7859	450.959	0.113633		450.959	-1.84188	-1.86054		450.959	-1.82441	-1.85576
450.039	0.0282834	450.039	2.12169	450.039	0.11164	450.039	2.06435	450.039	0.103349	450.039	2.02177	450.039	0.113679	450.039	2.14008	450.039	0.101524	450.039	2.05731	450.039	0.105315	450.039	1.94695	450.039	0.115383		450.039	-2.01005	-2.03855		450.039	-1.99258	-2.03378
448.967	0.0283354	448.967	2.38107	448.967	0.114704	448.967	2.2977	448.967	0.106006	448.967	2.2818	448.967	0.116735	448.967	2.37932	448.967	0.10323	448.967	2.3152	448.967	0.107029	448.967	2.19742	448.967	0.117511		448.967	-2.26637	-2.27609		448.967	-2.24891	-2.27132
448.047	0.028954	448.047	2.59242	448.047	0.117667	448.047	2.51083	448.047	0.108801	448.047	2.44165	448.047	0.119403	448.047	2.50383	448.047	0.105084	448.047	2.49696	448.047	0.109346	448.047	2.35562	448.047	0.119666		448.047	-2.47475	-2.39875		448.047	-2.45729	-2.39397
446.974	0.0291471	446.974	2.82042	446.974	0.121071	446.974	2.73848	446.974	0.111804	446.974	2.67215	446.974	0.122475	446.974	2.79457	446.974	0.106827	446.974	2.70607	446.974	0.11137	446.974	2.58121	446.974	0.121531		446.974	-2.69935	-2.68775		446.974	-2.68189	-2.68297
446.054	0.0292332	446.054	3.16178	446.054	0.124049	446.054	2.89353	446.054	0.114539	446.054	2.84003	446.054	0.125142	446.054	2.96069	446.054	0.108372	446.054	2.91417	446.054	0.113297	446.054	2.81823	446.054	0.123423		446.054	-3.03774	-2.85232		446.054	-3.02027	-2.84755
444.981	0.0288326	444.981	3.36601	444.981	0.12796	444.981	3.23129	444.981	0.117701	444.981	3.14155	444.981	0.1288	444.981	3.21974	444.981	0.11025	444.981	3.36773	444.981	0.11538	444.981	2.97497	444.981	0.125615		444.981	-3.23805	-3.10949		444.981	-3.22059	-3.10471
444.061	0.0289873	444.061	3.46353	444.061	0.13252	444.061	3.15275	444.061	0.122196	444.061	3.23506	444.061	0.133056	444.061	3.53306	444.061	0.113143	444.061	3.44854	444.061	0.118221	444.061	3.223	444.061	0.128439		444.061	-3.33101	-3.41992		444.061	-3.31354	-3.41514
442.987	0.0293306	442.987	10	442.987	0.138502	442.987	4.09635	442.987	0.127189	442.987	3.47542	442.987	0.138313	442.987	3.35196	442.987	0.116529	442.987	10	442.987	0.122153	442.987	3.99485	442.987	0.132374		442.987	-9.8615	-3.23543		442.987	-9.84403	-3.23065
442.066	0.0295187	442.066	10	442.066	0.142409	442.066	4.37072	442.066	0.130692	442.066	3.8991	442.066	0.142128	442.066	3.79631	442.066	0.118787	442.066	3.6541	442.066	0.124481	442.066	3.86163	442.066	0.134817		442.066	-9.85759	-3.67752		442.066	-9.84013	-3.67275
440.992	0.0295439	440.992	4.24831	440.992	0.147754	440.992	3.67657	440.992	0.135379	440.992	3.54947	440.992	0.146889	440.992	3.45725	440.992	0.121755	440.992	3.62021	440.992	0.127603	440.992	3.8606	440.992	0.138122		440.992	-4.10055	-3.3355		440.992	-4.08309	-3.33072
440.071	0.0296067	440.071	10	440.071	0.154293	440.071	10	440.071	0.141285	440.071	10	440.071	0.152726	440.071	3.61648	440.071	0.125361	440.071	4.13541	440.071	0.131554	440.071	4.52974	440.071	0.142014		440.071	-9.84571	-3.49111		440.071	-9.82824	-3.48634
438.996	0.0293492	438.996	3.89567	438.996	0.16193	438.996	10	438.996	0.148033	438.996	3.89947	438.996	0.15958	438.996	4.18678	438.996	0.129803	438.996	3.63911	438.996	0.135921	438.996	3.75781	438.996	0.146417		438.996	-3.73374	-4.05698		438.996	-3.71627	-4.0522
438.075	0.0293274	438.075	4.22896	438.075	0.168702	438.075	3.60871	438.075	0.154039	438.075	4.05189	438.075	0.166052	438.075	3.41269	438.075	0.133634	438.075	3.88025	438.075	0.140277	438.075	5.11298	438.075	0.150859		438.075	-4.06025	-3.27906		438.075	-4.04279	-3.27428
437	0.0293605	437	10	437	0.176591	437	10	437	0.161163	437	3.54926	437	0.173046	437	4.01391	437	0.138642	437	3.54563	437	0.145034	437	3.3753	437	0.155732		437	-9.82341	-3.87526		437	-9.80594	-3.87049
435.925	0.0295719	435.925	4.05721	435.925	0.184845	435.925	4.89857	435.925	0.16827	435.925	3.74565	435.925	0.180571	435.925	3.89801	435.925	0.14346	435.925	3.97389	435.925	0.149737	435.925	10	435.925	0.160609		435.925	-3.87237	-3.75455		435.925	-3.8549	-3.74977
435.003	0.0292659	435.003	4.44881	435.003	0.193956	435.003	3.67272	435.003	0.176696	435.003	3.84112	435.003	0.189032	435.003	3.40493	435.003	0.149059	435.003	3.67185	435.003	0.155288	435.003	3.5635	435.003	0.166379		435.003	-4.25485	-3.25587		435.003	-4.23739	-3.2511
433.928	0.0292352	433.928	10	433.928	0.207004	433.928	4.38013	433.928	0.188714	433.928	10	433.928	0.200527	433.928	3.78052	433.928	0.157235	433.928	3.4041	433.928	0.163237	433.928	3.70658	433.928	0.174287		433.928	-9.793	-3.62329		433.928	-9.77553	-3.61851
433.006	0.0291072	433.006	3.97809	433.006	0.21729	433.006	3.36679	433.006	0.197969	433.006	3.61624	433.006	0.210141	433.006	4.05928	433.006	0.163844	433.006	3.7524	433.006	0.169668	433.006	3.87752	433.006	0.180018		433.006	-3.7608	-3.89544		433.006	-3.74333	-3.89066
431.93	0.029291	431.93	10	431.93	0.231704	431.93	10	431.93	0.210624	431.93	3.44512	431.93	0.222611	431.93	10	431.93	0.172508	431.93	3.94091	431.93	0.178081	431.93	3.75996	431.93	0.188636		431.93	-9.7683	-9.82749		431.93	-9.75083	-9.82272
431.007	0.0291458	431.007	3.6518	431.007	0.241781	431.007	10	431.007	0.219988	431.007	10	431.007	0.231817	431.007	3.86987	431.007	0.178707	431.007	3.85445	431.007	0.184014	431.007	3.27473	431.007	0.194672		431.007	-3.41002	-3.69117		431.007	-3.39255	-3.68639
429.931	0.0291954	429.931	4.09814	429.931	0.259274	429.931	3.63986	429.931	0.235686	429.931	3.41323	429.931	0.247608	429.931	3.82143	429.931	0.189453	429.931	3.36536	429.931	0.194647	429.931	3.54625	429.931	0.204481		429.931	-3.83887	-3.63197		429.931	-3.8214	-3.6272
429.008	0.0290022	429.008	10	429.008	0.280261	429.008	10	429.008	0.254586	429.008	10	429.008	0.266089	429.008	10	429.008	0.202813	429.008	3.67861	429.008	0.206948	429.008	3.47906	429.008	0.216767		429.008	-9.71974	-9.79719		429.008	-9.70227	-9.79241
427.932	0.0293147	427.932	10	427.932	0.302786	427.932	10	427.932	0.27471	427.932	10	427.932	0.286215	427.932	3.72276	427.932	0.216662	427.932	4.10053	427.932	0.219984	427.932	3.85973	427.932	0.229648		427.932	-9.69721	-3.5061		427.932	-9.67975	-3.50133
427.009	0.0291286	427.009	3.86322	427.009	0.324138	427.009	10	427.009	0.29389	427.009	10	427.009	0.305799	427.009	4.41231	427.009	0.229766	427.009	3.98864	427.009	0.23293	427.009	4.11582	427.009	0.241993		427.009	-3.53909	-4.18254		427.009	-3.52162	-4.17776
425.932	0.0290732	425.932	10	425.932	0.348394	425.932	10	425.932	0.315057	425.932	4.15161	425.932	0.327323	425.932	4.1098	425.932	0.244032	425.932	4.21506	425.932	0.246254	425.932	10	425.932	0.25501		425.932	-9.65161	-3.86577		425.932	-9.63414	-3.86099
425.008	0.0289271	425.008	4.0895	425.008	0.372812	425.008	10	425.008	0.33726	425.008	10	425.008	0.348894	425.008	3.55063	425.008	0.2591	425.008	3.93748	425.008	0.260843	425.008	4.09751	425.008	0.268584		425.008	-3.71669	-3.29153		425.008	-3.69922	-3.28675
423.931	0.028645	423.931	10	423.931	0.41204	423.931	10	423.931	0.372207	423.931	3.64257	423.931	0.384201	423.931	3.64837	423.931	0.281886	423.931	10	423.931	0.282328	423.931	10	423.931	0.289785		423.931	-9.58796	-3.36648		423.931	-9.5705	-3.3617
423.007	0.0288612	423.007	10	423.007	0.447754	423.007	10	423.007	0.40364	423.007	10	423.007	0.416111	423.007	4.13803	423.007	0.303031	423.007	10	423.007	0.301826	423.007	3.9779	423.007	0.308997		423.007	-9.55225	-3.835		423.007	-9.53478	-3.83023
421.929	0.0284746	421.929	4.12491	421.929	0.49421	421.929	4.65051	421.929	0.443953	421.929	3.79265	421.929	0.456346	421.929	3.68346	421.929	0.329242	421.929	10	421.929	0.326768	421.929	3.92752	421.929	0.333009		421.929	-3.6307	-3.35422		421.929	-3.61324	-3.34944
421.005	0.0284469	421.005	10	421.005	0.531165	421.005	10	421.005	0.476407	421.005	3.86549	421.005	0.489203	421.005	3.86703	421.005	0.350065	421.005	4.96146	421.005	0.346268	421.005	3.82566	421.005	0.352142		421.005	-9.46883	-3.51696		421.005	-9.45137	-3.51219
419.927	0.0280623	419.927	10	419.927	0.587344	419.927	10	419.927	0.525448	419.927	10	419.927	0.539314	419.927	3.79213	419.927	0.381634	419.927	3.52121	419.927	0.375877	419.927	3.787	419.927	0.380441		419.927	-9.41266	-3.41049		419.927	-9.39519	-3.40572
419.003	0.0273343	419.003	10	419.003	0.644984	419.003	3.50034	419.003	0.57467	419.003	3.95725	419.003	0.590272	419.003	10	419.003	0.412691	419.003	3.66275	419.003	0.405393	419.003	3.7089	419.003	0.409247		419.003	-9.35502	-9.58731		419.003	-9.33755	-9.58253
417.924	0.0272592	417.924	10	417.924	0.71487	417.924	4.16955	417.924	0.633514	417.924	10	417.924	0.649376	417.924	3.61052	417.924	0.450355	417.924	3.8307	417.924	0.440939	417.924	4.09669	417.924	0.444381		417.924	-9.28513	-3.16017		417.924	-9.26767	-3.15539
417	0.0271539	417	10	417	0.76795	417	3.75008	417	0.680361	417	10	417	0.69777	417	3.33099	417	0.479927	417	3.77594	417	0.468398	417	3.17136	417	0.470791		417	-9.23205	-2.85106		417	-9.21459	-2.84629
416.075	0.0270348	416.075	3.78587	416.075	0.809691	416.075	4.30814	416.075	0.716421	416.075	4.22385	416.075	0.734285	416.075	10	416.075	0.503624	416.075	3.68984	416.075	0.489801	416.075	3.75848	416.075	0.491814		416.075	-2.97618	-9.49638		416.075	-2.95871	-9.4916
414.996	0.0268228	414.996	4.27063	414.996	0.852861	414.996	10	414.996	0.75234	414.996	4.34679	414.996	0.770054	414.996	3.72794	414.996	0.528004	414.996	4.12258	414.996	0.511213	414.996	4.09671	414.996	0.512616		414.996	-3.41777	-3.19994		414.996	-3.40031	-3.19516
414.071	0.0266502	414.071	10	414.071	0.870531	414.071	3.67199	414.071	0.767251	414.071	4.7552	414.071	0.78524	414.071	3.42741	414.071	0.540689	414.071	3.54982	414.071	0.521423	414.071	3.41861	414.071	0.521776		414.071	-9.12947	-2.88672		414.071	-9.11201	-2.88194
412.991	0.0264093	412.991	3.70398	412.991	0.867808	412.991	3.56936	412.991	0.763764	412.991	3.46306	412.991	0.781404	412.991	3.9564	412.991	0.543868	412.991	4.57297	412.991	0.522041	412.991	10	412.991	0.521372		412.991	-2.83617	-3.41253		412.991	-2.81871	-3.40775
412.066	0.0261519	412.066	3.3973	412.066	0.848489	412.066	10	412.066	0.74745	412.066	4.49478	412.066	0.762604	412.066	3.71344	412.066	0.539034	412.066	4.15793	412.066	0.514691	412.066	3.21177	412.066	0.513261		412.066	-2.54881	-3.17441		412.066	-2.53135	-3.16963
410.986	0.0258535	410.986	3.47504	410.986	0.815937	410.986	4.06126	410.986	0.71964	410.986	4.86795	410.986	0.73239	410.986	3.43489	410.986	0.528773	410.986	3.887	410.986	0.501913	410.986	3.60081	410.986	0.49937		410.986	-2.6591	-2.90612		410.986	-2.64164	-2.90134
410.06	0.0257551	410.06	3.64945	410.06	0.786906	410.06	3.7154	410.06	0.694189	410.06	3.90576	410.06	0.705019	410.06	4.16567	410.06	0.52017	410.06	3.8033	410.06	0.490329	410.06	10	410.06	0.486932		410.06	-2.86255	-3.6455		410.06	-2.84508	-3.64072
408.98	0.0254853	408.98	3.18082	408.98	0.746462	408.98	10	408.98	0.657811	408.98	3.31832	408.98	0.666096	408.98	4.4464	408.98	0.507622	408.98	3.7069	408.98	0.474212	408.98	3.67068	408.98	0.469665		408.98	-2.43436	-3.93877		408.98	-2.41689	-3.934
408.054	0.0252694	408.054	4.29516	408.054	0.707843	408.054	10	408.054	0.624993	408.054	10	408.054	0.631554	408.054	3.44122	408.054	0.497658	408.054	3.72908	408.054	0.460555	408.054	10	408.054	0.453781		408.054	-3.58732	-2.94356		408.054	-3.56986	-2.93879
406.974	0.0250281	406.974	10	406.974	0.672907	406.974	3.36624	406.974	0.595712	406.974	3.28762	406.974	0.598001	406.974	4.00809	406.974	0.490183	406.974	3.62658	406.974	0.448588	406.974	3.30562	406.974	0.44015		406.974	-9.32709	-3.51791		406.974	-9.30963	-3.51313
406.047	0.0249288	406.047	10	406.047	0.64483	406.047	5.3773	406.047	0.571664	406.047	10	406.047	0.571621	406.047	3.85951	406.047	0.485583	406.047	3.48633	406.047	0.440536	406.047	3.58601	406.047	0.429991		406.047	-9.35517	-3.37392		406.047	-9.33771	-3.36915
404.966	0.0248961	404.966	10	404.966	0.616829	404.966	3.67946	404.966	0.547753	404.966	4.24757	404.966	0.544878	404.966	3.68817	404.966	0.483195	404.966	3.41546	404.966	0.433109	404.966	3.47185	404.966	0.420601		404.966	-9.38317	-3.20498		404.966	-9.36571	-3.2002
404.04	0.024621	404.04	3.3672	404.04	0.598464	404.04	3.98567	404.04	0.531852	404.04	3.58862	404.04	0.526771	404.04	4.15052	404.04	0.483296	404.04	4.17417	404.04	0.429478	404.04	3.38502	404.04	0.414616		404.04	-2.76873	-3.66722		404.04	-2.75127	-3.66244
402.958	0.025006	402.958	4.333	402.958	0.576753	402.958	10	402.958	0.514162	402.958	4.54035	402.958	0.50532	402.958	3.51043	402.958	0.485628	402.958	3.52051	402.958	0.427209	402.958	3.37852	402.958	0.409052		402.958	-3.75625	-3.0248		402.958	-3.73879	-3.02002
402.032	0.0246546	402.032	5.02315	402.032	0.560203	402.032	3.63176	402.032	0.501575	402.032	3.66741	402.032	0.48963	402.032	5.31642	402.032	0.48983	402.032	3.58102	402.032	0.425973	402.032	2.96015	402.032	0.405762		402.032	-4.46294	-4.82659		402.032	-4.44548	-4.82181
400.95	0.0249366	400.95	4.29545	400.95	0.54603	400.95	10	400.95	0.489195	400.95	4.12624	400.95	0.475268	400.95	3.67132	400.95	0.495081	400.95	4.82886	400.95	0.426554	400.95	10	400.95	0.403279		400.95	-3.74942	-3.17624		400.95	-3.73195	-3.17146
400.023	0.0250074	400.023	10	400.023	0.534842	400.023	4.73075	400.023	0.480118	400.023	10	400.023	0.463254	400.023	3.59885	400.023	0.501578	400.023	10	400.023	0.428734	400.023	3.95668	400.023	0.402939		400.023	-9.46516	-3.09728		400.023	-9.44769	-3.0925
bper alone
bper alone
Collection Time: 12/19/2013 10:51:44 PM
Operator Name :
Scan Software Version: 3.00(182)
Parameter List :
Instrument Cary 50
Instrument Version 3.00
Start (nm) 700.0
Stop (nm) 400.0
X Mode Nanometers
Y Mode Abs
UV-Vis Scan Rate (nm/min) 600.00
UV-Vis Data Interval (nm) 1.00
UV-Vis Ave. Time (sec) 0.1000
Beam Mode Dual Beam
Baseline Correction Off
Cycle Mode Off
Comments
Method Log :
Method Name : C:\Users\chemuser\Desktop\Pellock\heme spectra.MSW
Date/Time stamp: 10/11/2013 11:18:31 PM
Method Modifications:
Cell Changer 6x6 Changed: 10/11/2013 11:01:28 PM	Old:1
UVVIS SAT Changed: 10/11/2013 11:02:03 PM	Old:0.0125
NIR SAT Changed: 10/11/2013 11:02:03 PM	Old:0.0125
Common SAT Changed: 10/11/2013 11:02:03 PM	Old:0.0125
UVVIS SAT Changed: 10/11/2013 11:02:19 PM	Old:0.1000
NIR SAT Changed: 10/11/2013 11:02:19 PM	Old:0.1000
Common SAT Changed: 10/11/2013 11:02:19 PM	Old:0.1000
UVVIS SAT Changed: 10/11/2013 11:02:31 PM	Old:0.0125
NIR SAT Changed: 10/11/2013 11:02:31 PM	Old:0.0125
Common SAT Changed: 10/11/2013 11:02:31 PM	Old:0.0125
UVVIS SAT Changed: 10/11/2013 11:02:38 PM	Old:0.5000
NIR SAT Changed: 10/11/2013 11:02:38 PM	Old:0.5000
Common SAT Changed: 10/11/2013 11:02:38 PM	Old:0.5000
Temp Controller Changed: 10/11/2013 11:02:53 PM	Old:0
Sipper Type Changed: 10/11/2013 11:02:53 PM	Old:Internal RSA
Saved as C:\Users\chemuser\Desktop\Pellock\heme spectra.MSW
Opened C:\Users\chemuser\Desktop\Pellock\heme spectra.MSW
End Method Modifications
<Current Wavelength>	400.9
mr1 4hr ox #1
mr1 4hr ox #1
Collection Time: 12/19/2013 10:58:28 PM
Operator Name :
Scan Software Version: 3.00(182)
Parameter List :
Instrument Cary 50
Instrument Version 3.00
Start (nm) 700.0
Stop (nm) 400.0
X Mode Nanometers
Y Mode Abs
UV-Vis Scan Rate (nm/min) 600.00
UV-Vis Data Interval (nm) 1.00
UV-Vis Ave. Time (sec) 0.1000
Beam Mode Dual Beam
Baseline Correction Off
Cycle Mode Off
Comments
Method Log :
Method Name : C:\Users\chemuser\Desktop\Pellock\heme spectra.MSW
Date/Time stamp: 10/11/2013 11:18:31 PM
Method Modifications:
Cell Changer 6x6 Changed: 10/11/2013 11:01:28 PM	Old:1
UVVIS SAT Changed: 10/11/2013 11:02:03 PM	Old:0.0125
NIR SAT Changed: 10/11/2013 11:02:03 PM	Old:0.0125
Common SAT Changed: 10/11/2013 11:02:03 PM	Old:0.0125
UVVIS SAT Changed: 10/11/2013 11:02:19 PM	Old:0.1000
NIR SAT Changed: 10/11/2013 11:02:19 PM	Old:0.1000
Common SAT Changed: 10/11/2013 11:02:19 PM	Old:0.1000
UVVIS SAT Changed: 10/11/2013 11:02:31 PM	Old:0.0125
NIR SAT Changed: 10/11/2013 11:02:31 PM	Old:0.0125
Common SAT Changed: 10/11/2013 11:02:31 PM	Old:0.0125
UVVIS SAT Changed: 10/11/2013 11:02:38 PM	Old:0.5000
NIR SAT Changed: 10/11/2013 11:02:38 PM	Old:0.5000
Common SAT Changed: 10/11/2013 11:02:38 PM	Old:0.5000
Temp Controller Changed: 10/11/2013 11:02:53 PM	Old:0
Sipper Type Changed: 10/11/2013 11:02:53 PM	Old:Internal RSA
Saved as C:\Users\chemuser\Desktop\Pellock\heme spectra.MSW
Opened C:\Users\chemuser\Desktop\Pellock\heme spectra.MSW
End Method Modifications
<Current Wavelength>	400.9
mr1 4hr ox #1
mr1 4hr ox #1
Collection Time: 12/19/2013 10:59:41 PM
Operator Name :
Scan Software Version: 3.00(182)
Parameter List :
Instrument Cary 50
Instrument Version 3.00
Start (nm) 700.0
Stop (nm) 400.0
X Mode Nanometers
Y Mode Abs
UV-Vis Scan Rate (nm/min) 600.00
UV-Vis Data Interval (nm) 1.00
UV-Vis Ave. Time (sec) 0.1000
Beam Mode Dual Beam
Baseline Correction Off
Cycle Mode Off
Comments
Method Log :
Method Name : C:\Users\chemuser\Desktop\Pellock\heme spectra.MSW
Date/Time stamp: 10/11/2013 11:18:31 PM
Method Modifications:
Cell Changer 6x6 Changed: 10/11/2013 11:01:28 PM	Old:1
UVVIS SAT Changed: 10/11/2013 11:02:03 PM	Old:0.0125
NIR SAT Changed: 10/11/2013 11:02:03 PM	Old:0.0125
Common SAT Changed: 10/11/2013 11:02:03 PM	Old:0.0125
UVVIS SAT Changed: 10/11/2013 11:02:19 PM	Old:0.1000
NIR SAT Changed: 10/11/2013 11:02:19 PM	Old:0.1000
Common SAT Changed: 10/11/2013 11:02:19 PM	Old:0.1000
UVVIS SAT Changed: 10/11/2013 11:02:31 PM	Old:0.0125
NIR SAT Changed: 10/11/2013 11:02:31 PM	Old:0.0125
Common SAT Changed: 10/11/2013 11:02:31 PM	Old:0.0125
UVVIS SAT Changed: 10/11/2013 11:02:38 PM	Old:0.5000
NIR SAT Changed: 10/11/2013 11:02:38 PM	Old:0.5000
Common SAT Changed: 10/11/2013 11:02:38 PM	Old:0.5000
Temp Controller Changed: 10/11/2013 11:02:53 PM	Old:0
Sipper Type Changed: 10/11/2013 11:02:53 PM	Old:Internal RSA
Saved as C:\Users\chemuser\Desktop\Pellock\heme spectra.MSW
Opened C:\Users\chemuser\Desktop\Pellock\heme spectra.MSW
End Method Modifications
<Current Wavelength>	400.9
mr1 4hr ox #1
mr1 4hr ox #1
Collection Time: 12/19/2013 11:00:45 PM
Operator Name :
Scan Software Version: 3.00(182)
Parameter List :
Instrument Cary 50
Instrument Version 3.00
Start (nm) 700.0
Stop (nm) 400.0
X Mode Nanometers
Y Mode Abs
UV-Vis Scan Rate (nm/min) 600.00
UV-Vis Data Interval (nm) 1.00
UV-Vis Ave. Time (sec) 0.1000
Beam Mode Dual Beam
Baseline Correction Off
Cycle Mode Off
Comments
Method Log :
Method Name : C:\Users\chemuser\Desktop\Pellock\heme spectra.MSW
Date/Time stamp: 10/11/2013 11:18:31 PM
Method Modifications:
Cell Changer 6x6 Changed: 10/11/2013 11:01:28 PM	Old:1
UVVIS SAT Changed: 10/11/2013 11:02:03 PM	Old:0.0125
NIR SAT Changed: 10/11/2013 11:02:03 PM	Old:0.0125
Common SAT Changed: 10/11/2013 11:02:03 PM	Old:0.0125
UVVIS SAT Changed: 10/11/2013 11:02:19 PM	Old:0.1000
NIR SAT Changed: 10/11/2013 11:02:19 PM	Old:0.1000
Common SAT Changed: 10/11/2013 11:02:19 PM	Old:0.1000
UVVIS SAT Changed: 10/11/2013 11:02:31 PM	Old:0.0125
NIR SAT Changed: 10/11/2013 11:02:31 PM	Old:0.0125
Common SAT Changed: 10/11/2013 11:02:31 PM	Old:0.0125
UVVIS SAT Changed: 10/11/2013 11:02:38 PM	Old:0.5000
NIR SAT Changed: 10/11/2013 11:02:38 PM	Old:0.5000
Common SAT Changed: 10/11/2013 11:02:38 PM	Old:0.5000
Temp Controller Changed: 10/11/2013 11:02:53 PM	Old:0
Sipper Type Changed: 10/11/2013 11:02:53 PM	Old:Internal RSA
Saved as C:\Users\chemuser\Desktop\Pellock\heme spectra.MSW
Opened C:\Users\chemuser\Desktop\Pellock\heme spectra.MSW
End Method Modifications
<Current Wavelength>	400.9
mr1 4hr red #1
mr1 4hr red #1
Collection Time: 12/19/2013 11:03:35 PM
Operator Name :
Scan Software Version: 3.00(182)
Parameter List :
Instrument Cary 50
Instrument Version 3.00
Start (nm) 700.0
Stop (nm) 400.0
X Mode Nanometers
Y Mode Abs
UV-Vis Scan Rate (nm/min) 600.00
UV-Vis Data Interval (nm) 1.00
UV-Vis Ave. Time (sec) 0.1000
Beam Mode Dual Beam
Baseline Correction Off
Cycle Mode Off
Comments
Method Log :
Method Name : C:\Users\chemuser\Desktop\Pellock\heme spectra.MSW
Date/Time stamp: 10/11/2013 11:18:31 PM
Method Modifications:
Cell Changer 6x6 Changed: 10/11/2013 11:01:28 PM	Old:1
UVVIS SAT Changed: 10/11/2013 11:02:03 PM	Old:0.0125
NIR SAT Changed: 10/11/2013 11:02:03 PM	Old:0.0125
Common SAT Changed: 10/11/2013 11:02:03 PM	Old:0.0125
UVVIS SAT Changed: 10/11/2013 11:02:19 PM	Old:0.1000
NIR SAT Changed: 10/11/2013 11:02:19 PM	Old:0.1000
Common SAT Changed: 10/11/2013 11:02:19 PM	Old:0.1000
UVVIS SAT Changed: 10/11/2013 11:02:31 PM	Old:0.0125
NIR SAT Changed: 10/11/2013 11:02:31 PM	Old:0.0125
Common SAT Changed: 10/11/2013 11:02:31 PM	Old:0.0125
UVVIS SAT Changed: 10/11/2013 11:02:38 PM	Old:0.5000
NIR SAT Changed: 10/11/2013 11:02:38 PM	Old:0.5000
Common SAT Changed: 10/11/2013 11:02:38 PM	Old:0.5000
Temp Controller Changed: 10/11/2013 11:02:53 PM	Old:0
Sipper Type Changed: 10/11/2013 11:02:53 PM	Old:Internal RSA
Saved as C:\Users\chemuser\Desktop\Pellock\heme spectra.MSW
Opened C:\Users\chemuser\Desktop\Pellock\heme spectra.MSW
End Method Modifications
<Current Wavelength>	400.9
mr1 4hr ox #2
mr1 4hr ox #2
Collection Time: 12/19/2013 11:05:44 PM
Operator Name :
Scan Software Version: 3.00(182)
Parameter List :
Instrument Cary 50
Instrument Version 3.00
Start (nm) 700.0
Stop (nm) 400.0
X Mode Nanometers
Y Mode Abs
UV-Vis Scan Rate (nm/min) 600.00
UV-Vis Data Interval (nm) 1.00
UV-Vis Ave. Time (sec) 0.1000
Beam Mode Dual Beam
Baseline Correction Off
Cycle Mode Off
Comments
Method Log :
Method Name : C:\Users\chemuser\Desktop\Pellock\heme spectra.MSW
Date/Time stamp: 10/11/2013 11:18:31 PM
Method Modifications:
Cell Changer 6x6 Changed: 10/11/2013 11:01:28 PM	Old:1
UVVIS SAT Changed: 10/11/2013 11:02:03 PM	Old:0.0125
NIR SAT Changed: 10/11/2013 11:02:03 PM	Old:0.0125
Common SAT Changed: 10/11/2013 11:02:03 PM	Old:0.0125
UVVIS SAT Changed: 10/11/2013 11:02:19 PM	Old:0.1000
NIR SAT Changed: 10/11/2013 11:02:19 PM	Old:0.1000
Common SAT Changed: 10/11/2013 11:02:19 PM	Old:0.1000
UVVIS SAT Changed: 10/11/2013 11:02:31 PM	Old:0.0125
NIR SAT Changed: 10/11/2013 11:02:31 PM	Old:0.0125
Common SAT Changed: 10/11/2013 11:02:31 PM	Old:0.0125
UVVIS SAT Changed: 10/11/2013 11:02:38 PM	Old:0.5000
NIR SAT Changed: 10/11/2013 11:02:38 PM	Old:0.5000
Common SAT Changed: 10/11/2013 11:02:38 PM	Old:0.5000
Temp Controller Changed: 10/11/2013 11:02:53 PM	Old:0
Sipper Type Changed: 10/11/2013 11:02:53 PM	Old:Internal RSA
Saved as C:\Users\chemuser\Desktop\Pellock\heme spectra.MSW
Opened C:\Users\chemuser\Desktop\Pellock\heme spectra.MSW
End Method Modifications
<Current Wavelength>	400.9
mr1 4hr red #2
mr1 4hr red #2
Collection Time: 12/19/2013 11:07:58 PM
Operator Name :
Scan Software Version: 3.00(182)
Parameter List :
Instrument Cary 50
Instrument Version 3.00
Start (nm) 700.0
Stop (nm) 400.0
X Mode Nanometers
Y Mode Abs
UV-Vis Scan Rate (nm/min) 600.00
UV-Vis Data Interval (nm) 1.00
UV-Vis Ave. Time (sec) 0.1000
Beam Mode Dual Beam
Baseline Correction Off
Cycle Mode Off
Comments
Method Log :
Method Name : C:\Users\chemuser\Desktop\Pellock\heme spectra.MSW
Date/Time stamp: 10/11/2013 11:18:31 PM
Method Modifications:
Cell Changer 6x6 Changed: 10/11/2013 11:01:28 PM	Old:1
UVVIS SAT Changed: 10/11/2013 11:02:03 PM	Old:0.0125
NIR SAT Changed: 10/11/2013 11:02:03 PM	Old:0.0125
Common SAT Changed: 10/11/2013 11:02:03 PM	Old:0.0125
UVVIS SAT Changed: 10/11/2013 11:02:19 PM	Old:0.1000
NIR SAT Changed: 10/11/2013 11:02:19 PM	Old:0.1000
Common SAT Changed: 10/11/2013 11:02:19 PM	Old:0.1000
UVVIS SAT Changed: 10/11/2013 11:02:31 PM	Old:0.0125
NIR SAT Changed: 10/11/2013 11:02:31 PM	Old:0.0125
Common SAT Changed: 10/11/2013 11:02:31 PM	Old:0.0125
UVVIS SAT Changed: 10/11/2013 11:02:38 PM	Old:0.5000
NIR SAT Changed: 10/11/2013 11:02:38 PM	Old:0.5000
Common SAT Changed: 10/11/2013 11:02:38 PM	Old:0.5000
Temp Controller Changed: 10/11/2013 11:02:53 PM	Old:0
Sipper Type Changed: 10/11/2013 11:02:53 PM	Old:Internal RSA
Saved as C:\Users\chemuser\Desktop\Pellock\heme spectra.MSW
Opened C:\Users\chemuser\Desktop\Pellock\heme spectra.MSW
End Method Modifications
<Current Wavelength>	400.9
mr1 4hr ox #3
mr1 4hr ox #3
Collection Time: 12/19/2013 11:09:41 PM
Operator Name :
Scan Software Version: 3.00(182)
Parameter List :
Instrument Cary 50
Instrument Version 3.00
Start (nm) 700.0
Stop (nm) 400.0
X Mode Nanometers
Y Mode Abs
UV-Vis Scan Rate (nm/min) 600.00
UV-Vis Data Interval (nm) 1.00
UV-Vis Ave. Time (sec) 0.1000
Beam Mode Dual Beam
Baseline Correction Off
Cycle Mode Off
Comments
Method Log :
Method Name : C:\Users\chemuser\Desktop\Pellock\heme spectra.MSW
Date/Time stamp: 10/11/2013 11:18:31 PM
Method Modifications:
Cell Changer 6x6 Changed: 10/11/2013 11:01:28 PM	Old:1
UVVIS SAT Changed: 10/11/2013 11:02:03 PM	Old:0.0125
NIR SAT Changed: 10/11/2013 11:02:03 PM	Old:0.0125
Common SAT Changed: 10/11/2013 11:02:03 PM	Old:0.0125
UVVIS SAT Changed: 10/11/2013 11:02:19 PM	Old:0.1000
NIR SAT Changed: 10/11/2013 11:02:19 PM	Old:0.1000
Common SAT Changed: 10/11/2013 11:02:19 PM	Old:0.1000
UVVIS SAT Changed: 10/11/2013 11:02:31 PM	Old:0.0125
NIR SAT Changed: 10/11/2013 11:02:31 PM	Old:0.0125
Common SAT Changed: 10/11/2013 11:02:31 PM	Old:0.0125
UVVIS SAT Changed: 10/11/2013 11:02:38 PM	Old:0.5000
NIR SAT Changed: 10/11/2013 11:02:38 PM	Old:0.5000
Common SAT Changed: 10/11/2013 11:02:38 PM	Old:0.5000
Temp Controller Changed: 10/11/2013 11:02:53 PM	Old:0
Sipper Type Changed: 10/11/2013 11:02:53 PM	Old:Internal RSA
Saved as C:\Users\chemuser\Desktop\Pellock\heme spectra.MSW
Opened C:\Users\chemuser\Desktop\Pellock\heme spectra.MSW
End Method Modifications
<Current Wavelength>	400.9
mr1 4hr red #3
mr1 4hr red #3
Collection Time: 12/19/2013 11:11:36 PM
Operator Name :
Scan Software Version: 3.00(182)
Parameter List :
Instrument Cary 50
Instrument Version 3.00
Start (nm) 700.0
Stop (nm) 400.0
X Mode Nanometers
Y Mode Abs
UV-Vis Scan Rate (nm/min) 600.00
UV-Vis Data Interval (nm) 1.00
UV-Vis Ave. Time (sec) 0.1000
Beam Mode Dual Beam
Baseline Correction Off
Cycle Mode Off
Comments
Method Log :
Method Name : C:\Users\chemuser\Desktop\Pellock\heme spectra.MSW
Date/Time stamp: 10/11/2013 11:18:31 PM
Method Modifications:
Cell Changer 6x6 Changed: 10/11/2013 11:01:28 PM	Old:1
UVVIS SAT Changed: 10/11/2013 11:02:03 PM	Old:0.0125
NIR SAT Changed: 10/11/2013 11:02:03 PM	Old:0.0125
Common SAT Changed: 10/11/2013 11:02:03 PM	Old:0.0125
UVVIS SAT Changed: 10/11/2013 11:02:19 PM	Old:0.1000
NIR SAT Changed: 10/11/2013 11:02:19 PM	Old:0.1000
Common SAT Changed: 10/11/2013 11:02:19 PM	Old:0.1000
UVVIS SAT Changed: 10/11/2013 11:02:31 PM	Old:0.0125
NIR SAT Changed: 10/11/2013 11:02:31 PM	Old:0.0125
Common SAT Changed: 10/11/2013 11:02:31 PM	Old:0.0125
UVVIS SAT Changed: 10/11/2013 11:02:38 PM	Old:0.5000
NIR SAT Changed: 10/11/2013 11:02:38 PM	Old:0.5000
Common SAT Changed: 10/11/2013 11:02:38 PM	Old:0.5000
Temp Controller Changed: 10/11/2013 11:02:53 PM	Old:0
Sipper Type Changed: 10/11/2013 11:02:53 PM	Old:Internal RSA
Saved as C:\Users\chemuser\Desktop\Pellock\heme spectra.MSW
Opened C:\Users\chemuser\Desktop\Pellock\heme spectra.MSW
End Method Modifications
<Current Wavelength>	400.9
15 4hr ox #1
15 4hr ox #1
Collection Time: 12/19/2013 11:17:07 PM
Operator Name :
Scan Software Version: 3.00(182)
Parameter List :
Instrument Cary 50
Instrument Version 3.00
Start (nm) 700.0
Stop (nm) 400.0
X Mode Nanometers
Y Mode Abs
UV-Vis Scan Rate (nm/min) 600.00
UV-Vis Data Interval (nm) 1.00
UV-Vis Ave. Time (sec) 0.1000
Beam Mode Dual Beam
Baseline Correction Off
Cycle Mode Off
Comments
Method Log :
Method Name : C:\Users\chemuser\Desktop\Pellock\heme spectra.MSW
Date/Time stamp: 10/11/2013 11:18:31 PM
Method Modifications:
Cell Changer 6x6 Changed: 10/11/2013 11:01:28 PM	Old:1
UVVIS SAT Changed: 10/11/2013 11:02:03 PM	Old:0.0125
NIR SAT Changed: 10/11/2013 11:02:03 PM	Old:0.0125
Common SAT Changed: 10/11/2013 11:02:03 PM	Old:0.0125
UVVIS SAT Changed: 10/11/2013 11:02:19 PM	Old:0.1000
NIR SAT Changed: 10/11/2013 11:02:19 PM	Old:0.1000
Common SAT Changed: 10/11/2013 11:02:19 PM	Old:0.1000
UVVIS SAT Changed: 10/11/2013 11:02:31 PM	Old:0.0125
NIR SAT Changed: 10/11/2013 11:02:31 PM	Old:0.0125
Common SAT Changed: 10/11/2013 11:02:31 PM	Old:0.0125
UVVIS SAT Changed: 10/11/2013 11:02:38 PM	Old:0.5000
NIR SAT Changed: 10/11/2013 11:02:38 PM	Old:0.5000
Common SAT Changed: 10/11/2013 11:02:38 PM	Old:0.5000
Temp Controller Changed: 10/11/2013 11:02:53 PM	Old:0
Sipper Type Changed: 10/11/2013 11:02:53 PM	Old:Internal RSA
Saved as C:\Users\chemuser\Desktop\Pellock\heme spectra.MSW
Opened C:\Users\chemuser\Desktop\Pellock\heme spectra.MSW
End Method Modifications
<Current Wavelength>	400.9
15 4hr red #1
15 4hr red #1
Collection Time: 12/19/2013 11:20:08 PM
Operator Name :
Scan Software Version: 3.00(182)
Parameter List :
Instrument Cary 50
Instrument Version 3.00
Start (nm) 700.0
Stop (nm) 400.0
X Mode Nanometers
Y Mode Abs
UV-Vis Scan Rate (nm/min) 600.00
UV-Vis Data Interval (nm) 1.00
UV-Vis Ave. Time (sec) 0.1000
Beam Mode Dual Beam
Baseline Correction Off
Cycle Mode Off
Comments
Method Log :
Method Name : C:\Users\chemuser\Desktop\Pellock\heme spectra.MSW
Date/Time stamp: 10/11/2013 11:18:31 PM
Method Modifications:
Cell Changer 6x6 Changed: 10/11/2013 11:01:28 PM	Old:1
UVVIS SAT Changed: 10/11/2013 11:02:03 PM	Old:0.0125
NIR SAT Changed: 10/11/2013 11:02:03 PM	Old:0.0125
Common SAT Changed: 10/11/2013 11:02:03 PM	Old:0.0125
UVVIS SAT Changed: 10/11/2013 11:02:19 PM	Old:0.1000
NIR SAT Changed: 10/11/2013 11:02:19 PM	Old:0.1000
Common SAT Changed: 10/11/2013 11:02:19 PM	Old:0.1000
UVVIS SAT Changed: 10/11/2013 11:02:31 PM	Old:0.0125
NIR SAT Changed: 10/11/2013 11:02:31 PM	Old:0.0125
Common SAT Changed: 10/11/2013 11:02:31 PM	Old:0.0125
UVVIS SAT Changed: 10/11/2013 11:02:38 PM	Old:0.5000
NIR SAT Changed: 10/11/2013 11:02:38 PM	Old:0.5000
Common SAT Changed: 10/11/2013 11:02:38 PM	Old:0.5000
Temp Controller Changed: 10/11/2013 11:02:53 PM	Old:0
Sipper Type Changed: 10/11/2013 11:02:53 PM	Old:Internal RSA
Saved as C:\Users\chemuser\Desktop\Pellock\heme spectra.MSW
Opened C:\Users\chemuser\Desktop\Pellock\heme spectra.MSW
End Method Modifications
<Current Wavelength>	400.9
15 4hr ox #2
15 4hr ox #2
Collection Time: 12/19/2013 11:22:06 PM
Operator Name :
Scan Software Version: 3.00(182)
Parameter List :
Instrument Cary 50
Instrument Version 3.00
Start (nm) 700.0
Stop (nm) 400.0
X Mode Nanometers
Y Mode Abs
UV-Vis Scan Rate (nm/min) 600.00
UV-Vis Data Interval (nm) 1.00
UV-Vis Ave. Time (sec) 0.1000
Beam Mode Dual Beam
Baseline Correction Off
Cycle Mode Off
Comments
Method Log :
Method Name : C:\Users\chemuser\Desktop\Pellock\heme spectra.MSW
Date/Time stamp: 10/11/2013 11:18:31 PM
Method Modifications:
Cell Changer 6x6 Changed: 10/11/2013 11:01:28 PM	Old:1
UVVIS SAT Changed: 10/11/2013 11:02:03 PM	Old:0.0125
NIR SAT Changed: 10/11/2013 11:02:03 PM	Old:0.0125
Common SAT Changed: 10/11/2013 11:02:03 PM	Old:0.0125
UVVIS SAT Changed: 10/11/2013 11:02:19 PM	Old:0.1000
NIR SAT Changed: 10/11/2013 11:02:19 PM	Old:0.1000
Common SAT Changed: 10/11/2013 11:02:19 PM	Old:0.1000
UVVIS SAT Changed: 10/11/2013 11:02:31 PM	Old:0.0125
NIR SAT Changed: 10/11/2013 11:02:31 PM	Old:0.0125
Common SAT Changed: 10/11/2013 11:02:31 PM	Old:0.0125
UVVIS SAT Changed: 10/11/2013 11:02:38 PM	Old:0.5000
NIR SAT Changed: 10/11/2013 11:02:38 PM	Old:0.5000
Common SAT Changed: 10/11/2013 11:02:38 PM	Old:0.5000
Temp Controller Changed: 10/11/2013 11:02:53 PM	Old:0
Sipper Type Changed: 10/11/2013 11:02:53 PM	Old:Internal RSA
Saved as C:\Users\chemuser\Desktop\Pellock\heme spectra.MSW
Opened C:\Users\chemuser\Desktop\Pellock\heme spectra.MSW
End Method Modifications
<Current Wavelength>	400.9
15 4hr red #2
15 4hr red #2
Collection Time: 12/19/2013 11:24:12 PM
Operator Name :
Scan Software Version: 3.00(182)
Parameter List :
Instrument Cary 50
Instrument Version 3.00
Start (nm) 700.0
Stop (nm) 400.0
X Mode Nanometers
Y Mode Abs
UV-Vis Scan Rate (nm/min) 600.00
UV-Vis Data Interval (nm) 1.00
UV-Vis Ave. Time (sec) 0.1000
Beam Mode Dual Beam
Baseline Correction Off
Cycle Mode Off
Comments
Method Log :
Method Name : C:\Users\chemuser\Desktop\Pellock\heme spectra.MSW
Date/Time stamp: 10/11/2013 11:18:31 PM
Method Modifications:
Cell Changer 6x6 Changed: 10/11/2013 11:01:28 PM	Old:1
UVVIS SAT Changed: 10/11/2013 11:02:03 PM	Old:0.0125
NIR SAT Changed: 10/11/2013 11:02:03 PM	Old:0.0125
Common SAT Changed: 10/11/2013 11:02:03 PM	Old:0.0125
UVVIS SAT Changed: 10/11/2013 11:02:19 PM	Old:0.1000
NIR SAT Changed: 10/11/2013 11:02:19 PM	Old:0.1000
Common SAT Changed: 10/11/2013 11:02:19 PM	Old:0.1000
UVVIS SAT Changed: 10/11/2013 11:02:31 PM	Old:0.0125
NIR SAT Changed: 10/11/2013 11:02:31 PM	Old:0.0125
Common SAT Changed: 10/11/2013 11:02:31 PM	Old:0.0125
UVVIS SAT Changed: 10/11/2013 11:02:38 PM	Old:0.5000
NIR SAT Changed: 10/11/2013 11:02:38 PM	Old:0.5000
Common SAT Changed: 10/11/2013 11:02:38 PM	Old:0.5000
Temp Controller Changed: 10/11/2013 11:02:53 PM	Old:0
Sipper Type Changed: 10/11/2013 11:02:53 PM	Old:Internal RSA
Saved as C:\Users\chemuser\Desktop\Pellock\heme spectra.MSW
Opened C:\Users\chemuser\Desktop\Pellock\heme spectra.MSW
End Method Modifications
<Current Wavelength>	400.9
15 4hr ox #3
15 4hr ox #3
Collection Time: 12/19/2013 11:26:16 PM
Operator Name :
Scan Software Version: 3.00(182)
Parameter List :
Instrument Cary 50
Instrument Version 3.00
Start (nm) 700.0
Stop (nm) 400.0
X Mode Nanometers
Y Mode Abs
UV-Vis Scan Rate (nm/min) 600.00
UV-Vis Data Interval (nm) 1.00
UV-Vis Ave. Time (sec) 0.1000
Beam Mode Dual Beam
Baseline Correction Off
Cycle Mode Off
Comments
Method Log :
Method Name : C:\Users\chemuser\Desktop\Pellock\heme spectra.MSW
Date/Time stamp: 10/11/2013 11:18:31 PM
Method Modifications:
Cell Changer 6x6 Changed: 10/11/2013 11:01:28 PM	Old:1
UVVIS SAT Changed: 10/11/2013 11:02:03 PM	Old:0.0125
NIR SAT Changed: 10/11/2013 11:02:03 PM	Old:0.0125
Common SAT Changed: 10/11/2013 11:02:03 PM	Old:0.0125
UVVIS SAT Changed: 10/11/2013 11:02:19 PM	Old:0.1000
NIR SAT Changed: 10/11/2013 11:02:19 PM	Old:0.1000
Common SAT Changed: 10/11/2013 11:02:19 PM	Old:0.1000
UVVIS SAT Changed: 10/11/2013 11:02:31 PM	Old:0.0125
NIR SAT Changed: 10/11/2013 11:02:31 PM	Old:0.0125
Common SAT Changed: 10/11/2013 11:02:31 PM	Old:0.0125
UVVIS SAT Changed: 10/11/2013 11:02:38 PM	Old:0.5000
NIR SAT Changed: 10/11/2013 11:02:38 PM	Old:0.5000
Common SAT Changed: 10/11/2013 11:02:38 PM	Old:0.5000
Temp Controller Changed: 10/11/2013 11:02:53 PM	Old:0
Sipper Type Changed: 10/11/2013 11:02:53 PM	Old:Internal RSA
Saved as C:\Users\chemuser\Desktop\Pellock\heme spectra.MSW
Opened C:\Users\chemuser\Desktop\Pellock\heme spectra.MSW
End Method Modifications
<Current Wavelength>	400.9
15 4hr red #3
15 4hr red #3
Collection Time: 12/19/2013 11:28:22 PM
Operator Name :
Scan Software Version: 3.00(182)
Parameter List :
Instrument Cary 50
Instrument Version 3.00
Start (nm) 700.0
Stop (nm) 400.0
X Mode Nanometers
Y Mode Abs
UV-Vis Scan Rate (nm/min) 600.00
UV-Vis Data Interval (nm) 1.00
UV-Vis Ave. Time (sec) 0.1000
Beam Mode Dual Beam
Baseline Correction Off
Cycle Mode Off
Comments
Method Log :
Method Name : C:\Users\chemuser\Desktop\Pellock\heme spectra.MSW
Date/Time stamp: 10/11/2013 11:18:31 PM
Method Modifications:
Cell Changer 6x6 Changed: 10/11/2013 11:01:28 PM	Old:1
UVVIS SAT Changed: 10/11/2013 11:02:03 PM	Old:0.0125
NIR SAT Changed: 10/11/2013 11:02:03 PM	Old:0.0125
Common SAT Changed: 10/11/2013 11:02:03 PM	Old:0.0125
UVVIS SAT Changed: 10/11/2013 11:02:19 PM	Old:0.1000
NIR SAT Changed: 10/11/2013 11:02:19 PM	Old:0.1000
Common SAT Changed: 10/11/2013 11:02:19 PM	Old:0.1000
UVVIS SAT Changed: 10/11/2013 11:02:31 PM	Old:0.0125
NIR SAT Changed: 10/11/2013 11:02:31 PM	Old:0.0125
Common SAT Changed: 10/11/2013 11:02:31 PM	Old:0.0125
UVVIS SAT Changed: 10/11/2013 11:02:38 PM	Old:0.5000
NIR SAT Changed: 10/11/2013 11:02:38 PM	Old:0.5000
Common SAT Changed: 10/11/2013 11:02:38 PM	Old:0.5000
Temp Controller Changed: 10/11/2013 11:02:53 PM	Old:0
Sipper Type Changed: 10/11/2013 11:02:53 PM	Old:Internal RSA
Saved as C:\Users\chemuser\Desktop\Pellock\heme spectra.MSW
Opened C:\Users\chemuser\Desktop\Pellock\heme spectra.MSW
End Method Modifications
<Current Wavelength>	400.9

## Sheet: Fig. 2C processed data
							[heme]µM	stdev
						MR1/ev 4hr	3.63212	0.2891			Comparison	T-test P value
						15/ev 4hr	1.87389	0.0320012			MR1/ev 4hr vs. 15/ev 4hr	0.00047034	***
							550-535
						mr1 4hr #1	0.0948752	3.95808
						mr1 4hr #2	0.0816598	3.40675
						mr1 4hr #3	0.0846512	3.53155
						mr1 4hr mean	0.087062	3.63212	0.2891
						stdev	0.00692972
						15 4hr #1	0.0458012	1.91077
						15 4hr #2	0.0445233	1.85746
						15 4hr #3	0.0444272	1.85345
						15 4hr mean	0.0449172	1.87389	0.0320012
						stdev	0.000767067
