# Supplementary material for: Reduced Heme Levels Underlie the Exponential Growth Defect of the Shewanella oneidensis hfq Mutant
Source: PLoS One. 2014 Oct 30;9(10):e109879. doi: 10.1371/journal.pone.0109879 (PMC4214671; doi:10.1371/journal.pone.0109879)
Supplement: Data S4 — Data for Figure 4 . Raw and processed data for growth curves and heme assays. (XLSX) [file pone.0109879.s004.xlsx]

## Sheet: Fig. 4A
	0	1	2	3	4	5	6	7	8	9	10	11	12	13	14	15	16	17	18
MR1/pBBAD-SP #1 LB Km	0.067	0.164	0.388	0.91	1.94	3.63	4.92	5.47	6.33	6.34	6.91	6.96	7.17	6.91	7.33	6.43	6.13	5.83	5.48
MR1/pBBAD-SP #2 LB Km	0.072	0.173	0.382	0.95	2.02	3.76	4.94	5.55	6.28	6.56	6.89	7.19	7.5	7.08	7.06	6.48	6.03	6.11	5.45
MR1/pBBAD-SP #3 LB Km	0.072	0.191	0.386	0.93	2.06	3.91	4.97	5.52	6.17	6.25	6.63	6.84	7.91	7.08	6.82	7.03	6.31	6.15	5.38
MR1/pBBAD-SP LB Km	0.0703333	0.176	0.385333	0.93	2.00667	3.76667	4.94333	5.51333	6.26	6.38333	6.81	6.99667	7.52667	7.02333	7.07	6.64667	6.15667	6.03	5.43667
STD ERR of MEAN	0.00166667	0.00793725	0.00176383	0.011547	0.0352767	0.0808977	0.0145297	0.0233333	0.0472582	0.0920748	0.090185	0.102686	0.214035	0.0566667	0.147309	0.192209	0.0819214	0.100664	0.0296273
STD DEV	0.00288675	0.0137477	0.00305505	0.02	0.061101	0.140119	0.0251661	0.0404145	0.0818535	0.159478	0.156205	0.177858	0.37072	0.0981495	0.255147	0.332916	0.141892	0.174356	0.051316
99% CI	0.00429305	0.020445	0.00454334	0.0297431	0.0908667	0.208379	0.0374259	0.0601027	0.121729	0.237169	0.232301	0.264502	0.551318	0.145964	0.379443	0.495099	0.211015	0.259294	0.0763149
hfqdelta #15/pBBAD-SP #1 LB Km	0.071	0.154	0.26	0.446	0.98	1.8	2.99	3.96	4.44	5.01	5.18	5.45	5.55	5.14	5.61	5.28	5.52	5.7	4.7
hfqdelta #15/pBBAD-SP #2 LB Km	0.074	0.142	0.261	0.416	0.91	1.86	2.87	3.61	4.06	4.57	4.86	4.7	5.01	5.04	5.53	4.97	5.03	5.21	5.39
hfqdelta #15/pBBAD-SP #3 LB Km	0.075	0.153	0.276	0.461	0.99	1.97	2.96	3.73	4.36	4.65	4.73	5.04	5.26	5.18	5.37	5.05	5.25	5.44	5.32
hfqdelta #15/pBBAD-SP LB Km	0.0733333	0.149667	0.265667	0.441	0.96	1.87667	2.94	3.76667	4.28667	4.74333	4.92333	5.06333	5.27333	5.12	5.50333	5.1	5.26667	5.45	5.13667
STD ERR of MEAN	0.00120185	0.00384419	0.00517472	0.0132288	0.0251661	0.0497773	0.0360555	0.102686	0.115662	0.135319	0.133708	0.21682	0.156027	0.0416333	0.0705534	0.0929157	0.141696	0.141539	0.219266
STD DEV	0.00208167	0.00665833	0.00896289	0.0229129	0.043589	0.0862168	0.06245	0.177858	0.200333	0.234379	0.231589	0.375544	0.270247	0.072111	0.122202	0.160935	0.245425	0.245153	0.379781
99% CI	0.00309576	0.00990197	0.0133292	0.034075	0.0648236	0.128218	0.0928728	0.264502	0.297926	0.348557	0.344408	0.558492	0.401899	0.10724	0.181733	0.239335	0.364985	0.364581	0.564793
MR1/pBBAD-SP #1 ALA50	0.074	0.193	0.395	0.93	1.91	3.76	5.06	5.61	6.61	6.54	6.69	7.73	7.63	6.99	6.54	6.47	6.45	6.45	5.58
MR1/pBBAD-SP #2 ALA50	0.076	0.199	0.423	1.13	2.12	3.7	5.01	5.8	6.1	6.85	6.89	7.55	7.31	6.98	6.92	6.92	6.2	5.75	5.4
MR1/pBBAD-SP #3 ALA50	0.07	0.206	0.427	1.27	2.2	4.02	5.34	5.91	6.76	6.79	6.61	7.23	7.38	6.1	6.92	6.3	5.86	5.68	5.93
hfqdelta #15/vector	0.0733333	0.199333	0.415	1.11	2.07667	3.82667	5.13667	5.77333	6.49	6.72667	6.73	7.50333	7.44	6.69	6.79333	6.56333	6.17	5.96	5.63667
STD ERR of MEAN	0.00176383	0.00375648	0.0100664	0.0986577	0.0864741	0.0982061	0.102686	0.0876229	0.19975	0.0949269	0.0832666	0.146211	0.0971253	0.295014	0.126667	0.184962	0.170978	0.245832	0.155599
STD DEV	0.00305505	0.00650641	0.0174356	0.17088	0.149778	0.170098	0.177858	0.151767	0.345977	0.164418	0.144222	0.253246	0.168226	0.510979	0.219393	0.320364	0.296142	0.425793	0.269506
99% CI	0.00454334	0.00967604	0.0259294	0.254125	0.222743	0.252962	0.264502	0.225702	0.514522	0.244515	0.214481	0.376616	0.250178	0.759906	0.326272	0.476432	0.440409	0.633221	0.400797
hfqdelta #15/pBBAD-SP #1 LB Km ALA50	0.083	0.191	0.407	1.21	2.34	3.75	4.8	5.2	5.67	5.77	5.94	6.22	6.16	5.99	5.86	5.68	5.25	5.31	4.67
hfqdelta #15/pBBAD-SP #2 LB Km ALA50	0.08	0.196	0.427	1.25	2.13	3.77	4.75	5.36	6	5.56	5.51	6.27	6.39	5.59	5.8	5.73	5.42	5.19	5.04
hfqdelta #15/pBBAD-SP #3 LB Km ALA50	0.082	0.205	0.439	1.12	2.08	3.76	4.68	4.97	5.72	5.73	5.51	5.84	6.18	5.7	6.06	6.2	5.31	4.84	4.15
hfqdelta #15/phfq	0.0816667	0.197333	0.424333	1.19333	2.18333	3.76	4.74333	5.17667	5.79667	5.68667	5.65333	6.11	6.24333	5.76	5.90667	5.87	5.32667	5.11333	4.62
STD ERR of MEAN	0.000881917	0.00409607	0.00933333	0.0384419	0.079652	0.0057735	0.034801	0.113186	0.102686	0.0643774	0.143333	0.135769	0.0735603	0.119304	0.0785988	0.16563	0.0497773	0.140989	0.258134
STD DEV	0.00152753	0.0070946	0.0161658	0.0665833	0.137961	0.01	0.0602771	0.196044	0.177858	0.111505	0.248261	0.23516	0.12741	0.20664	0.136137	0.28688	0.0862168	0.244199	0.447102
99% CI	0.00227167	0.0105508	0.0240411	0.0990197	0.20517	0.0148716	0.0896415	0.291548	0.264502	0.165825	0.369202	0.349719	0.189479	0.307306	0.202457	0.426635	0.128218	0.363162	0.66491
	0	1	2	3	4	5	6	7	8	9	10	11	12	13	14	15	16	17	18
MR-1	0.0703333	0.176	0.385333	0.93	2.00667	3.76667	4.94333	5.51333	6.26	6.38333	6.81	6.99667	7.52667	7.02333	7.07	6.64667	6.15667	6.03	5.43667
hfqΔ	0.0733333	0.149667	0.265667	0.441	0.96	1.87667	2.94	3.76667	4.28667	4.74333	4.92333	5.06333	5.27333	5.12	5.50333	5.1	5.26667	5.45	5.13667
MR-1 ALA50	0.0733333	0.199333	0.415	1.11	2.07667	3.82667	5.13667	5.77333	6.49	6.72667	6.73	7.50333	7.44	6.69	6.79333	6.56333	6.17	5.96	5.63667
hfqΔ ALA50	0.0816667	0.197333	0.424333	1.19333	2.18333	3.76	4.74333	5.17667	5.79667	5.68667	5.65333	6.11	6.24333	5.76	5.90667	5.87	5.32667	5.11333	4.62

## Sheet: Fig. 4B raw data
549.948	-0.00821231	549.948	0.0564609	549.948	0.137435	549.948	0.0663239	549.948	0.16614	549.948	0.0708645	549.948	0.177583	549.948	0.03803	549.948	0.0697198	549.948	0.044653	549.948	0.0775633	549.948	0.041573	549.948	0.0778225	549.948	0.0559155	549.948	0.147273	549.948	0.0588215	549.948	0.144137	549.948	0.0630626	549.948	0.142231	549.948	0.0625309	549.948	0.129463	549.948	0.0701567	549.948	0.161052	549.948	0.0732995	549.948	0.169662
535.064	-8.88833e-05	535.064	0.0746411	535.064	0.0622633	535.064	0.0864524	535.064	0.0704553	535.064	0.0923852	535.064	0.0727935	535.064	0.0519571	535.064	0.0535313	535.064	0.0616372	535.064	0.0510993	535.064	0.0575606	535.064	0.0530091	535.064	0.0763207	535.064	0.0795348	535.064	0.0781393	535.064	0.072903	535.064	0.0838465	535.064	0.0707622	535.064	0.0807772	535.064	0.0728998	535.064	0.0901311	535.064	0.079611	535.064	0.0918986	535.064	0.0827779
					0.0809741	0	-0.071111	0	0.0998162	0	-0.0952756	0	0.106719	0	-0.139553	0	0.0316898	0	-0.0250668	0	0.0329103	0	-0.0359903	0	0.0362495	0	-0.021907	0	0.091358	0	-0.088452	0	0.0853151	0	-0.081074	0	0.0791683	0	-0.0797	0	0.0669317	0	-0.0593059	0	0.090895	0	-0.0877521	0	0.0963622
					-0.0123779	0	0.0241891	0	-0.0159971	0	0.0219299	0	-0.0195917	0	-0.0208364	0	0.0015742	0	0.00810591	0	-0.0105379	0	0.00646124	0	-0.00455144	0	0.0233115	0	0.0032141	0	-0.00139543	0	-0.00523633	0	0.0109435	0	-0.0130842	0	0.0100149	0	-0.00787736	0	0.0172313	0	-0.0105201	0	0.0122876	0	-0.00912076
				mr1 4hrs #1	0.0933519	0	-0.0953001	mr1 4hrs red #2	0.115813	0	-0.117205	mr1 4hrs red #3	0.126311	0	-0.118717	15 4hrs #1	0.0301156	0	-0.0331727	15 4hrs red #2	0.0434482	0	-0.0424516	15 4hrs red #3	0.040801	0	-0.0452185	mr1 8hrs #1	0.0881439	0	-0.0870565	mr1 8hrs red #2	0.0905514	0	-0.0920174	mr1 8hrs red #3	0.0922525	0	-0.0897149	15 8hrs #1	0.0748091	0	-0.0765372	15 8hrs red #2	0.101415	0	-0.10004	15 8hrs red #3	0.105483
				mr1 4hrs #2	0.115813											15 4hrs #2	0.0434482											mr1 8hrs #2	0.0905514											15 8hrs #2	0.101415
				mr1 4hrs #3	0.126311											15 4hrs #3	0.040801											mr1 8hrs #3	0.0922525											15 8hrs #3	0.105483
				mr1 4hrs mean	0.111825											15 4hrs mean	0.0381216											mr1 8hrs mean	0.0903159											15 8hrs mean	0.0939024
bper alone		mr1 4hrs ox #1		mr1 4hrs red #1		mr1 4hrs ox #2		mr1 4hrs red #2		mr1 4hrs ox #3		mr1 4hrs red #3		15 4hrs ox #1		15 4hrs red #1		15 4hrs ox #2		15 4hrs red #2		15 4hrs ox #3		15 4hrs red #3		mr1 8hrs ox #1		mr1 8hrs red #1		mr1 8hrs ox #2		mr1 8hrs red #2		mr1 8hrs ox #3		mr1 8hrs red #3		15 8hrs ox #1		15 8hrs red #1		15 8hrs ox #2		15 8hrs red #2		15 8hrs ox #3		15 8hrs red #3
Wavelength (nm)	Abs	Wavelength (nm)	Abs	Wavelength (nm)	Abs	Wavelength (nm)	Abs	Wavelength (nm)	Abs	Wavelength (nm)	Abs	Wavelength (nm)	Abs	Wavelength (nm)	Abs	Wavelength (nm)	Abs	Wavelength (nm)	Abs	Wavelength (nm)	Abs	Wavelength (nm)	Abs	Wavelength (nm)	Abs	Wavelength (nm)	Abs	Wavelength (nm)	Abs	Wavelength (nm)	Abs	Wavelength (nm)	Abs	Wavelength (nm)	Abs	Wavelength (nm)	Abs	Wavelength (nm)	Abs	Wavelength (nm)	Abs	Wavelength (nm)	Abs	Wavelength (nm)	Abs	Wavelength (nm)	Abs	Wavelength (nm)	Abs
700.017	-0.00651158	700.017	0.0115377	700.017	0.00140147	700.017	0.0125588	700.017	0.000690487	700.017	0.0100985	700.017	0.00294942	700.017	0.0185581	700.017	0.00533645	700.017	0.0112559	700.017	0.00111782	700.017	0.00808276	700.017	0.00048001	700.017	0.0102839	700.017	0.00705561	700.017	0.0161467	700.017	0.00362786	700.017	0.00879603	700.017	0.00131111	700.017	0.0151723	700.017	0.00403502	700.017	0.0228846	700.017	0.00420227	700.017	0.0163449	700.017	0.00478797
699.01	-0.00637217	699.01	0.0114151	699.01	0.00163282	699.01	0.0124123	699.01	0.000759122	699.01	0.00996106	699.01	0.00299475	699.01	0.0187033	699.01	0.00477967	699.01	0.0109005	699.01	0.00124558	699.01	0.0080543	699.01	0.000629641	699.01	0.0104799	699.01	0.00690052	699.01	0.0165324	699.01	0.00376375	699.01	0.00887803	699.01	0.00163851	699.01	0.0148608	699.01	0.00407383	699.01	0.0219229	699.01	0.00429839	699.01	0.0163923	699.01	0.00512688
698.002	-0.00613115	698.002	0.0118086	698.002	0.00187362	698.002	0.0128204	698.002	0.00109664	698.002	0.0102684	698.002	0.00339156	698.002	0.0187686	698.002	0.00538051	698.002	0.0115231	698.002	0.00179364	698.002	0.00870057	698.002	0.00121482	698.002	0.010695	698.002	0.00687627	698.002	0.016687	698.002	0.00444351	698.002	0.00929784	698.002	0.00193644	698.002	0.0153078	698.002	0.00446708	698.002	0.0224547	698.002	0.0046662	698.002	0.0166345	698.002	0.00534691
696.993	-0.00564548	696.993	0.0123591	696.993	0.00257551	696.993	0.0135041	696.993	0.00193829	696.993	0.010936	696.993	0.00419592	696.993	0.0184312	696.993	0.00576104	696.993	0.0122686	696.993	0.00215311	696.993	0.00949245	696.993	0.00144365	696.993	0.0111382	696.993	0.0074644	696.993	0.0179018	696.993	0.00482838	696.993	0.0104598	696.993	0.00288164	696.993	0.0159652	696.993	0.0048517	696.993	0.0226613	696.993	0.00558074	696.993	0.017329	696.993	0.00619773
695.985	-0.00499813	695.985	0.0133925	695.985	0.00283919	695.985	0.0136095	695.985	0.0024522	695.985	0.011494	695.985	0.00459067	695.985	0.0187793	695.985	0.00603648	695.985	0.0126136	695.985	0.00269505	695.985	0.0095704	695.985	0.00179639	695.985	0.0116148	695.985	0.00794311	695.985	0.0188199	695.985	0.00556325	695.985	0.0102988	695.985	0.00311982	695.985	0.0164976	695.985	0.00536667	695.985	0.0227306	695.985	0.00626062	695.985	0.0182347	695.985	0.00681184
694.976	-0.00426257	694.976	0.0136758	694.976	0.00315904	694.976	0.0137647	694.976	0.00258595	694.976	0.0121362	694.976	0.00506426	694.976	0.0190217	694.976	0.00667828	694.976	0.0129619	694.976	0.00305739	694.976	0.0102173	694.976	0.00246561	694.976	0.0116033	694.976	0.00816652	694.976	0.0192524	694.976	0.00650056	694.976	0.0106228	694.976	0.00332313	694.976	0.0170159	694.976	0.00596979	694.976	0.023302	694.976	0.00630876	694.976	0.0184373	694.976	0.00718958
693.966	-0.00451058	693.966	0.0140842	693.966	0.00384214	693.966	0.0140603	693.966	0.0033979	693.966	0.0125753	693.966	0.00543943	693.966	0.0193137	693.966	0.00708732	693.966	0.0136323	693.966	0.00338731	693.966	0.0101148	693.966	0.00265955	693.966	0.0120631	693.966	0.00842892	693.966	0.0199634	693.966	0.00702822	693.966	0.0114383	693.966	0.00408736	693.966	0.0169876	693.966	0.00642702	693.966	0.0237374	693.966	0.00694444	693.966	0.0193674	693.966	0.00762699
692.957	-0.00412321	692.957	0.0141585	692.957	0.00487576	692.957	0.0146898	692.957	0.00395315	692.957	0.0124829	692.957	0.00553262	692.957	0.0193987	692.957	0.00732171	692.957	0.0144307	692.957	0.00424049	692.957	0.0110798	692.957	0.00297749	692.957	0.0128546	692.957	0.00899384	692.957	0.0199773	692.957	0.00749413	692.957	0.0117169	692.957	0.00483707	692.957	0.0175414	692.957	0.00631977	692.957	0.0236522	692.957	0.007812	692.957	0.0195567	692.957	0.00831959
691.947	-0.00343753	691.947	0.0147911	691.947	0.0046561	691.947	0.014877	691.947	0.00407869	691.947	0.0132341	691.947	0.00611962	691.947	0.0194921	691.947	0.00732337	691.947	0.0145552	691.947	0.00454057	691.947	0.0111137	691.947	0.00389383	691.947	0.012865	691.947	0.00925003	691.947	0.020394	691.947	0.0077507	691.947	0.0118144	691.947	0.00470216	691.947	0.0178207	691.947	0.00710542	691.947	0.0233512	691.947	0.00839707	691.947	0.0201124	691.947	0.00877817
690.936	-0.00310513	690.936	0.0146703	690.936	0.00497829	690.936	0.0145957	690.936	0.00457835	690.936	0.0135197	690.936	0.00653675	690.936	0.0198122	690.936	0.00770358	690.936	0.0148929	690.936	0.00469915	690.936	0.0113955	690.936	0.003769	690.936	0.0133728	690.936	0.00920045	690.936	0.0209598	690.936	0.00815294	690.936	0.0126592	690.936	0.00533174	690.936	0.0185915	690.936	0.00744515	690.936	0.0240651	690.936	0.00904498	690.936	0.020726	690.936	0.0089082
690.07	-0.00299959	690.07	0.0153455	690.07	0.00506015	690.07	0.015092	690.07	0.0046892	690.07	0.0137406	690.07	0.00703788	690.07	0.0193446	690.07	0.00833487	690.07	0.0152455	690.07	0.00496962	690.07	0.0119027	690.07	0.00433204	690.07	0.0133315	690.07	0.0093801	690.07	0.0213323	690.07	0.00865803	690.07	0.0132133	690.07	0.0053668	690.07	0.0186141	690.07	0.00713892	690.07	0.0238868	690.07	0.00890144	690.07	0.0220789	690.07	0.00922864
689.059	-0.00270132	689.059	0.015826	689.059	0.00591555	689.059	0.0156954	689.059	0.00503375	689.059	0.0140691	689.059	0.00708063	689.059	0.0199607	689.059	0.00789969	689.059	0.0153383	689.059	0.00524527	689.059	0.0124302	689.059	0.00420253	689.059	0.0136175	689.059	0.00889578	689.059	0.022146	689.059	0.00859835	689.059	0.0136107	689.059	0.0059968	689.059	0.0190966	689.059	0.0080913	689.059	0.0239777	689.059	0.00928279	689.059	0.0229754	689.059	0.00958339
688.048	-0.0022734	688.048	0.0160569	688.048	0.00616486	688.048	0.0156251	688.048	0.00542627	688.048	0.0146026	688.048	0.00757747	688.048	0.0203866	688.048	0.00905022	688.048	0.0159462	688.048	0.0057122	688.048	0.0121196	688.048	0.00476716	688.048	0.0141979	688.048	0.00933479	688.048	0.0228692	688.048	0.00915149	688.048	0.0141179	688.048	0.00617426	688.048	0.0197142	688.048	0.00876103	688.048	0.024182	688.048	0.00966486	688.048	0.0241947	688.048	0.0104356
687.036	-0.00189424	687.036	0.0158994	687.036	0.00673417	687.036	0.0163405	687.036	0.00583208	687.036	0.0150541	687.036	0.00809262	687.036	0.0203515	687.036	0.00911506	687.036	0.0163467	687.036	0.00634396	687.036	0.0129311	687.036	0.00534248	687.036	0.0146029	687.036	0.00970676	687.036	0.0238294	687.036	0.00964408	687.036	0.0146967	687.036	0.006563	687.036	0.0197616	687.036	0.00891314	687.036	0.0244061	687.036	0.0105193	687.036	0.0253907	687.036	0.0106911
686.024	-0.00195738	686.024	0.0167729	686.024	0.00683043	686.024	0.0167829	686.024	0.00636702	686.024	0.0151661	686.024	0.00863202	686.024	0.0206151	686.024	0.00949629	686.024	0.0168404	686.024	0.00657664	686.024	0.0131336	686.024	0.00610334	686.024	0.0148532	686.024	0.00987364	686.024	0.0246951	686.024	0.00972304	686.024	0.0152349	686.024	0.00665972	686.024	0.0206186	686.024	0.00938451	686.024	0.0245307	686.024	0.0115178	686.024	0.0256602	686.024	0.0109237
685.012	-0.0014858	685.012	0.0171283	685.012	0.00714294	685.012	0.0171561	685.012	0.00664487	685.012	0.0157355	685.012	0.00887515	685.012	0.0214077	685.012	0.00965242	685.012	0.017096	685.012	0.00681752	685.012	0.0136937	685.012	0.00574664	685.012	0.0149688	685.012	0.00986657	685.012	0.0246842	685.012	0.010238	685.012	0.015259	685.012	0.00716842	685.012	0.0207695	685.012	0.00975497	685.012	0.0250439	685.012	0.0116938	685.012	0.0261613	685.012	0.0113955
684	-0.00113677	684	0.0175002	684	0.00734578	684	0.0174772	684	0.00713789	684	0.0159158	684	0.00879724	684	0.0213643	684	0.0100814	684	0.0172322	684	0.00714955	684	0.01337	684	0.0063511	684	0.0154151	684	0.0102144	684	0.0251947	684	0.0108989	684	0.0156976	684	0.00755871	684	0.0212571	684	0.00954537	684	0.0248282	684	0.0120803	684	0.0267489	684	0.0115252
682.987	-0.000768237	682.987	0.0172016	682.987	0.00764114	682.987	0.0180881	682.987	0.00722406	682.987	0.0163251	682.987	0.00911014	682.987	0.0213237	682.987	0.0101684	682.987	0.0179151	682.987	0.00742819	682.987	0.0136976	682.987	0.00668117	682.987	0.0154901	682.987	0.0106465	682.987	0.0250817	682.987	0.0107291	682.987	0.0160499	682.987	0.00791925	682.987	0.0211755	682.987	0.0102224	682.987	0.0253843	682.987	0.0121195	682.987	0.0264702	682.987	0.0120418
681.974	-0.000729061	681.974	0.0175574	681.974	0.00784969	681.974	0.018069	681.974	0.00715297	681.974	0.0169258	681.974	0.00926965	681.974	0.0213416	681.974	0.0105488	681.974	0.0182637	681.974	0.00787436	681.974	0.0141759	681.974	0.00697903	681.974	0.0165328	681.974	0.0107011	681.974	0.0246823	681.974	0.0110173	681.974	0.0163062	681.974	0.00803742	681.974	0.0219763	681.974	0.0105861	681.974	0.0259574	681.974	0.0125432	681.974	0.0273221	681.974	0.0122345
680.96	-0.000450803	680.96	0.0176544	680.96	0.00815877	680.96	0.0184182	680.96	0.00772271	680.96	0.0171462	680.96	0.00977241	680.96	0.0212174	680.96	0.0107365	680.96	0.0184713	680.96	0.00798166	680.96	0.0141155	680.96	0.0071196	680.96	0.0162924	680.96	0.0109707	680.96	0.0246079	680.96	0.0110671	680.96	0.0162423	680.96	0.00869703	680.96	0.0221969	680.96	0.0109066	680.96	0.0263097	680.96	0.0126398	680.96	0.0268396	680.96	0.0121692
679.946	-0.0001291	679.946	0.0181263	679.946	0.00862335	679.946	0.0188156	679.946	0.00779081	679.946	0.0173444	679.946	0.00980273	679.946	0.0212018	679.946	0.0107611	679.946	0.0185691	679.946	0.00815679	679.946	0.0146997	679.946	0.00729765	679.946	0.0165443	679.946	0.0111049	679.946	0.0246553	679.946	0.0112667	679.946	0.0167379	679.946	0.00850328	679.946	0.0223259	679.946	0.0107848	679.946	0.0268454	679.946	0.0129369	679.946	0.0266477	679.946	0.0127728
678.932	5.51375e-06	678.932	0.0185426	678.932	0.0089996	678.932	0.0190023	678.932	0.00874946	678.932	0.0177958	678.932	0.0100335	678.932	0.0212207	678.932	0.0110299	678.932	0.0191329	678.932	0.00840317	678.932	0.0151738	678.932	0.00794493	678.932	0.0168041	678.932	0.0112827	678.932	0.0246	678.932	0.0114905	678.932	0.0169538	678.932	0.0089416	678.932	0.0230281	678.932	0.0112533	678.932	0.0269457	678.932	0.0133014	678.932	0.0260653	678.932	0.0129505
678.063	0.000101847	678.063	0.0183762	678.063	0.00882667	678.063	0.0193161	678.063	0.00857929	678.063	0.0179215	678.063	0.0105397	678.063	0.0215707	678.063	0.0113124	678.063	0.019076	678.063	0.00891029	678.063	0.0151103	678.063	0.007955	678.063	0.0168717	678.063	0.0117329	678.063	0.0242609	678.063	0.0116905	678.063	0.017206	678.063	0.00909629	678.063	0.0234775	678.063	0.0116551	678.063	0.0274855	678.063	0.0135375	678.063	0.0258237	678.063	0.0135416
677.048	0.00055535	677.048	0.019048	677.048	0.00916167	677.048	0.0195342	677.048	0.00869605	677.048	0.0185484	677.048	0.0109966	677.048	0.0211198	677.048	0.0113981	677.048	0.0197528	677.048	0.00921058	677.048	0.0156858	677.048	0.00829732	677.048	0.0170839	677.048	0.0118626	677.048	0.0240436	677.048	0.01202	677.048	0.0172518	677.048	0.00937449	677.048	0.0236016	677.048	0.0119642	677.048	0.0280437	677.048	0.0139422	677.048	0.0254882	677.048	0.0134853
676.033	0.000852536	676.033	0.0188025	676.033	0.00978827	676.033	0.0201903	676.033	0.00916259	676.033	0.0189144	676.033	0.0108667	676.033	0.0209587	676.033	0.0117745	676.033	0.0194934	676.033	0.00936312	676.033	0.0151424	676.033	0.00876084	676.033	0.0174616	676.033	0.0122596	676.033	0.0239763	676.033	0.0116881	676.033	0.0180263	676.033	0.00959168	676.033	0.0243528	676.033	0.0125241	676.033	0.0283586	676.033	0.0139865	676.033	0.0261865	676.033	0.0136758
675.018	0.000922001	675.018	0.0189222	675.018	0.00983082	675.018	0.0199504	675.018	0.00919019	675.018	0.0189721	675.018	0.0113113	675.018	0.0209854	675.018	0.0121992	675.018	0.0199439	675.018	0.00970157	675.018	0.0159525	675.018	0.00871425	675.018	0.0180283	675.018	0.0123761	675.018	0.023797	675.018	0.0120965	675.018	0.0186912	675.018	0.00972307	675.018	0.0247024	675.018	0.0127414	675.018	0.0288597	675.018	0.0140177	675.018	0.0264973	675.018	0.0136268
674.002	0.000926203	674.002	0.0192602	674.002	0.00999444	674.002	0.0204789	674.002	0.00969543	674.002	0.0192163	674.002	0.0113623	674.002	0.0210021	674.002	0.0122872	674.002	0.0203165	674.002	0.00960158	674.002	0.0162319	674.002	0.00891306	674.002	0.0179274	674.002	0.0128973	674.002	0.0234995	674.002	0.0125915	674.002	0.0183223	674.002	0.0102645	674.002	0.0247586	674.002	0.0132156	674.002	0.0290475	674.002	0.0147342	674.002	0.026668	674.002	0.0142199
672.986	0.00126954	672.986	0.0196758	672.986	0.0103368	672.986	0.0212923	672.986	0.00984409	672.986	0.0193968	672.986	0.0119625	672.986	0.0213354	672.986	0.0128405	672.986	0.0206583	672.986	0.0106068	672.986	0.0163831	672.986	0.00963495	672.986	0.0185602	672.986	0.0130806	672.986	0.023642	672.986	0.0126273	672.986	0.0188215	672.986	0.0106114	672.986	0.02524	672.986	0.0137311	672.986	0.029455	672.986	0.0146051	672.986	0.026898	672.986	0.0143504
671.969	0.00119291	671.969	0.0203582	671.969	0.0103413	671.969	0.021539	671.969	0.0100402	671.969	0.0198752	671.969	0.0119098	671.969	0.0213241	671.969	0.0129622	671.969	0.020777	671.969	0.0106073	671.969	0.0168287	671.969	0.0096679	671.969	0.018781	671.969	0.0131581	671.969	0.0237445	671.969	0.0131444	671.969	0.0189573	671.969	0.0108016	671.969	0.0250689	671.969	0.013952	671.969	0.029795	671.969	0.0146924	671.969	0.0274118	671.969	0.0147632
670.953	0.00132669	670.953	0.0200242	670.953	0.0104576	670.953	0.0210756	670.953	0.0105335	670.953	0.0198512	670.953	0.0124942	670.953	0.0215948	670.953	0.0130062	670.953	0.0210563	670.953	0.0111353	670.953	0.0169623	670.953	0.0101871	670.953	0.0189674	670.953	0.0135872	670.953	0.0235808	670.953	0.0130677	670.953	0.0195808	670.953	0.0112245	670.953	0.025546	670.953	0.0142563	670.953	0.0301357	670.953	0.0154545	670.953	0.0278812	670.953	0.0151731
669.936	0.0020595	669.936	0.0205555	669.936	0.0106525	669.936	0.0223044	669.936	0.0109938	669.936	0.0200491	669.936	0.0125021	669.936	0.0217299	669.936	0.0128891	669.936	0.0212983	669.936	0.0113419	669.936	0.0173889	669.936	0.0102795	669.936	0.019194	669.936	0.0137962	669.936	0.0240099	669.936	0.0134976	669.936	0.0197663	669.936	0.0115325	669.936	0.0264029	669.936	0.0149241	669.936	0.0303897	669.936	0.0156305	669.936	0.0282642	669.936	0.0157351
669.064	0.0017586	669.064	0.0203232	669.064	0.0112687	669.064	0.0228692	669.064	0.0111073	669.064	0.0203937	669.064	0.0123847	669.064	0.0218767	669.064	0.0134164	669.064	0.0213473	669.064	0.0113174	669.064	0.0175782	669.064	0.0104971	669.064	0.0194751	669.064	0.0139159	669.064	0.0235421	669.064	0.0134879	669.064	0.0202053	669.064	0.0117891	669.064	0.0260651	669.064	0.0147043	669.064	0.0307602	669.064	0.0154814	669.064	0.0287704	669.064	0.0159075
668.046	0.00205963	668.046	0.0209945	668.046	0.0114592	668.046	0.0226583	668.046	0.0114203	668.046	0.0201848	668.046	0.0127987	668.046	0.02234	668.046	0.0137831	668.046	0.0209975	668.046	0.011253	668.046	0.0175521	668.046	0.010752	668.046	0.0196963	668.046	0.0144203	668.046	0.0239021	668.046	0.0131647	668.046	0.0202546	668.046	0.0115369	668.046	0.0265115	668.046	0.0153017	668.046	0.0308816	668.046	0.0156445	668.046	0.0285398	668.046	0.0156231
667.028	0.00143962	667.028	0.0203279	667.028	0.0114832	667.028	0.0225158	667.028	0.0117017	667.028	0.0202819	667.028	0.0123304	667.028	0.0216529	667.028	0.0135712	667.028	0.020639	667.028	0.0114093	667.028	0.0172077	667.028	0.0104339	667.028	0.0192101	667.028	0.0140821	667.028	0.023521	667.028	0.0133643	667.028	0.0201008	667.028	0.0116747	667.028	0.0264168	667.028	0.0151895	667.028	0.0304354	667.028	0.0154376	667.028	0.028706	667.028	0.0159856
666.01	0.0015195	666.01	0.0202992	666.01	0.0111178	666.01	0.0228917	666.01	0.0117241	666.01	0.0204718	666.01	0.0123153	666.01	0.0222415	666.01	0.0130446	666.01	0.0210958	666.01	0.011308	666.01	0.0168572	666.01	0.0102403	666.01	0.0189655	666.01	0.0138289	666.01	0.0234529	666.01	0.0137373	666.01	0.0196501	666.01	0.0115113	666.01	0.0265486	666.01	0.0153205	666.01	0.0304596	666.01	0.0153706	666.01	0.0283319	666.01	0.0157545
664.992	0.00182415	664.992	0.0201093	664.992	0.0108766	664.992	0.0229061	664.992	0.0112837	664.992	0.0198224	664.992	0.012381	664.992	0.0220004	664.992	0.0133475	664.992	0.0210621	664.992	0.0114007	664.992	0.0171356	664.992	0.0104035	664.992	0.0192152	664.992	0.0141334	664.992	0.023185	664.992	0.0132296	664.992	0.0199962	664.992	0.011488	664.992	0.0266391	664.992	0.015591	664.992	0.0302974	664.992	0.0150949	664.992	0.0285454	664.992	0.0155379
663.973	0.00110812	663.973	0.0200311	663.973	0.0112213	663.973	0.0234904	663.973	0.011472	663.973	0.0198787	663.973	0.0122525	663.973	0.0217273	663.973	0.0134861	663.973	0.0209958	663.973	0.0119054	663.973	0.0172955	663.973	0.0107087	663.973	0.0193151	663.973	0.0143097	663.973	0.0229222	663.973	0.013598	663.973	0.020131	663.973	0.0111075	663.973	0.0268734	663.973	0.0152546	663.973	0.0306607	663.973	0.0152186	663.973	0.0285631	663.973	0.0157447
662.954	0.0010476	662.954	0.0205749	662.954	0.011035	662.954	0.0238722	662.954	0.0119488	662.954	0.0200418	662.954	0.0125757	662.954	0.0221561	662.954	0.0135061	662.954	0.0209511	662.954	0.0118531	662.954	0.016969	662.954	0.0103036	662.954	0.0193344	662.954	0.0140201	662.954	0.0230806	662.954	0.013594	662.954	0.0199897	662.954	0.011888	662.954	0.0265031	662.954	0.0154673	662.954	0.0305877	662.954	0.0153569	662.954	0.0287662	662.954	0.0160385
661.934	0.00112916	661.934	0.0203881	661.934	0.0107771	661.934	0.023934	661.934	0.0123284	661.934	0.0195867	661.934	0.0125111	661.934	0.0221164	661.934	0.013231	661.934	0.0208419	661.934	0.0118704	661.934	0.0175844	661.934	0.0107012	661.934	0.0192547	661.934	0.0142179	661.934	0.0232924	661.934	0.0136456	661.934	0.0204812	661.934	0.0116843	661.934	0.0271188	661.934	0.0158117	661.934	0.0305698	661.934	0.015533	661.934	0.0289258	661.934	0.016255
661.06	0.00114305	661.06	0.0204368	661.06	0.0112546	661.06	0.024499	661.06	0.0124143	661.06	0.0199471	661.06	0.0125309	661.06	0.0225361	661.06	0.0134018	661.06	0.0208081	661.06	0.0117966	661.06	0.0174782	661.06	0.0107784	661.06	0.0192092	661.06	0.0144829	661.06	0.0233303	661.06	0.013983	661.06	0.0203316	661.06	0.011797	661.06	0.0272927	661.06	0.0158231	661.06	0.0307245	661.06	0.0154739	661.06	0.0286605	661.06	0.016148
660.04	0.00124898	660.04	0.0202764	660.04	0.0113518	660.04	0.0246511	660.04	0.0123347	660.04	0.0200005	660.04	0.0123874	660.04	0.0224688	660.04	0.013574	660.04	0.0208368	660.04	0.0118334	660.04	0.0174882	660.04	0.0109868	660.04	0.0190455	660.04	0.0141437	660.04	0.0230483	660.04	0.013693	660.04	0.0203712	660.04	0.0118436	660.04	0.026922	660.04	0.01581	660.04	0.0303775	660.04	0.0155052	660.04	0.0291202	660.04	0.0163591
659.02	0.0011302	659.02	0.0201106	659.02	0.0111613	659.02	0.0246773	659.02	0.0127396	659.02	0.0198208	659.02	0.0123635	659.02	0.0226375	659.02	0.0130544	659.02	0.0208642	659.02	0.0119699	659.02	0.0175141	659.02	0.0106322	659.02	0.0191721	659.02	0.0142533	659.02	0.0229975	659.02	0.0138788	659.02	0.0203714	659.02	0.0118965	659.02	0.0270443	659.02	0.0163724	659.02	0.0308858	659.02	0.015466	659.02	0.0294472	659.02	0.0167729
657.999	0.000733114	657.999	0.0204098	657.999	0.0113311	657.999	0.0251671	657.999	0.012957	657.999	0.0202189	657.999	0.0129265	657.999	0.0232842	657.999	0.0133982	657.999	0.0208344	657.999	0.0119796	657.999	0.017482	657.999	0.0109566	657.999	0.0192248	657.999	0.0142663	657.999	0.0231055	657.999	0.0139013	657.999	0.0204521	657.999	0.0121189	657.999	0.0268784	657.999	0.0163312	657.999	0.0305131	657.999	0.0157517	657.999	0.0294271	657.999	0.0166337
656.978	0.00105886	656.978	0.0204379	656.978	0.011204	656.978	0.0252558	656.978	0.0130291	656.978	0.0201186	656.978	0.0127213	656.978	0.0229272	656.978	0.0135225	656.978	0.0205186	656.978	0.0119574	656.978	0.0176096	656.978	0.0107109	656.978	0.0190463	656.978	0.0144123	656.978	0.0233927	656.978	0.0139304	656.978	0.0207809	656.978	0.0118485	656.978	0.0269192	656.978	0.0166747	656.978	0.0311619	656.978	0.0158256	656.978	0.0298598	656.978	0.0167769
655.957	0.000889109	655.957	0.0206073	655.957	0.0112249	655.957	0.0257158	655.957	0.0130339	655.957	0.0202298	655.957	0.0125626	655.957	0.0231591	655.957	0.0137781	655.957	0.021115	655.957	0.0117204	655.957	0.0178529	655.957	0.0112311	655.957	0.0191564	655.957	0.0144936	655.957	0.0235153	655.957	0.0136879	655.957	0.020877	655.957	0.0121846	655.957	0.0272193	655.957	0.0168202	655.957	0.0306922	655.957	0.0158674	655.957	0.0298213	655.957	0.0174036
654.936	0.00104625	654.936	0.0207674	654.936	0.0115226	654.936	0.0262859	654.936	0.0135802	654.936	0.020433	654.936	0.0128762	654.936	0.0233764	654.936	0.0138105	654.936	0.0211562	654.936	0.0122162	654.936	0.0180246	654.936	0.0113463	654.936	0.0192925	654.936	0.0149055	654.936	0.0235053	654.936	0.0140951	654.936	0.0208485	654.936	0.0121065	654.936	0.0275873	654.936	0.0172271	654.936	0.0306125	654.936	0.0157056	654.936	0.0297528	654.936	0.0175508
654.06	0.000981669	654.06	0.0207196	654.06	0.0116746	654.06	0.0260477	654.06	0.0138167	654.06	0.0206498	654.06	0.0129192	654.06	0.0236048	654.06	0.0137089	654.06	0.0210668	654.06	0.01237	654.06	0.017946	654.06	0.0115213	654.06	0.0193333	654.06	0.014647	654.06	0.0238381	654.06	0.0138963	654.06	0.0213174	654.06	0.0123652	654.06	0.0275682	654.06	0.0170268	654.06	0.0307723	654.06	0.0160236	654.06	0.0299144	654.06	0.0176889
653.037	0.00110069	653.037	0.0204578	653.037	0.0116826	653.037	0.0261021	653.037	0.014243	653.037	0.0202134	653.037	0.0129999	653.037	0.0240754	653.037	0.0137404	653.037	0.0213106	653.037	0.0123211	653.037	0.0183147	653.037	0.0111545	653.037	0.0192754	653.037	0.0147533	653.037	0.024314	653.037	0.0143138	653.037	0.0212075	653.037	0.0124144	653.037	0.0279461	653.037	0.0170153	653.037	0.0305416	653.037	0.0162889	653.037	0.029998	653.037	0.0180421
652.015	0.000935853	652.015	0.0209989	652.015	0.0118128	652.015	0.0264085	652.015	0.0141267	652.015	0.0209385	652.015	0.0128312	652.015	0.0243088	652.015	0.0137857	652.015	0.0213269	652.015	0.0123059	652.015	0.0182366	652.015	0.0115317	652.015	0.0194658	652.015	0.0145167	652.015	0.024352	652.015	0.0142079	652.015	0.021336	652.015	0.0125009	652.015	0.028009	652.015	0.0170917	652.015	0.030722	652.015	0.0163502	652.015	0.0299895	652.015	0.017521
650.992	0.00115961	650.992	0.0213723	650.992	0.0118889	650.992	0.0261332	650.992	0.0137638	650.992	0.020683	650.992	0.0128109	650.992	0.0243429	650.992	0.0135911	650.992	0.0215078	650.992	0.0123499	650.992	0.01862	650.992	0.0114737	650.992	0.0195111	650.992	0.0147816	650.992	0.0247519	650.992	0.0142936	650.992	0.0214509	650.992	0.0125393	650.992	0.028099	650.992	0.0170179	650.992	0.0307346	650.992	0.0160408	650.992	0.0303333	650.992	0.0183818
649.969	0.00133593	649.969	0.0212538	649.969	0.0116589	649.969	0.0262713	649.969	0.014576	649.969	0.0211532	649.969	0.0131175	649.969	0.0249634	649.969	0.0137996	649.969	0.0221312	649.969	0.0124824	649.969	0.0187522	649.969	0.0115059	649.969	0.0197488	649.969	0.0147505	649.969	0.0253783	649.969	0.0143635	649.969	0.0220801	649.969	0.0127668	649.969	0.0281415	649.969	0.0173963	649.969	0.0308221	649.969	0.0167148	649.969	0.03059	649.969	0.0178699
648.946	0.00138387	648.946	0.0211665	648.946	0.0119344	648.946	0.026264	648.946	0.0142898	648.946	0.0215061	648.946	0.0127239	648.946	0.0253609	648.946	0.0135926	648.946	0.0218952	648.946	0.0123296	648.946	0.0187056	648.946	0.0112686	648.946	0.0201542	648.946	0.0149024	648.946	0.0250815	648.946	0.0142795	648.946	0.0220745	648.946	0.0129538	648.946	0.0280634	648.946	0.0173807	648.946	0.0309439	648.946	0.016589	648.946	0.0304004	648.946	0.0182049
648.068	0.00100087	648.068	0.0212194	648.068	0.0121213	648.068	0.0262788	648.068	0.0149142	648.068	0.021464	648.068	0.0129946	648.068	0.0251427	648.068	0.0136991	648.068	0.0222146	648.068	0.0123777	648.068	0.0191656	648.068	0.0115873	648.068	0.019852	648.068	0.0149096	648.068	0.0259624	648.068	0.0143386	648.068	0.0220453	648.068	0.0129214	648.068	0.0285849	648.068	0.0169021	648.068	0.0310254	648.068	0.0166383	648.068	0.0306322	648.068	0.0182962
647.044	0.00104456	647.044	0.021709	647.044	0.0119317	647.044	0.0257158	647.044	0.0149423	647.044	0.0216109	647.044	0.0132038	647.044	0.0256547	647.044	0.014168	647.044	0.0225391	647.044	0.0122989	647.044	0.0191185	647.044	0.012007	647.044	0.0205068	647.044	0.0144994	647.044	0.026058	647.044	0.014899	647.044	0.0224181	647.044	0.0131955	647.044	0.0286317	647.044	0.0174176	647.044	0.0314493	647.044	0.0167972	647.044	0.0305929	647.044	0.0182379
646.02	0.00116978	646.02	0.0216656	646.02	0.0119635	646.02	0.0261373	646.02	0.0151496	646.02	0.0214617	646.02	0.0128757	646.02	0.025858	646.02	0.0143647	646.02	0.0226111	646.02	0.0123717	646.02	0.0193154	646.02	0.0117566	646.02	0.0202287	646.02	0.0152287	646.02	0.0264908	646.02	0.0145465	646.02	0.0226681	646.02	0.0134462	646.02	0.0288573	646.02	0.0172217	646.02	0.0311632	646.02	0.0165126	646.02	0.0309257	646.02	0.0184546
644.996	0.00128128	644.996	0.0215498	644.996	0.0119499	644.996	0.0256896	644.996	0.0155261	644.996	0.0219167	644.996	0.0131798	644.996	0.0263273	644.996	0.0139887	644.996	0.0227509	644.996	0.0124742	644.996	0.0195612	644.996	0.0119216	644.996	0.0206205	644.996	0.0152676	644.996	0.0272431	644.996	0.0143897	644.996	0.0229239	644.996	0.0131227	644.996	0.0290397	644.996	0.0174349	644.996	0.0317498	644.996	0.0167998	644.996	0.0310973	644.996	0.0183899
643.971	0.00106405	643.971	0.02206	643.971	0.0117829	643.971	0.026052	643.971	0.015884	643.971	0.0223925	643.971	0.0136282	643.971	0.0261926	643.971	0.0139886	643.971	0.0226636	643.971	0.01266	643.971	0.020059	643.971	0.0120432	643.971	0.0209657	643.971	0.015346	643.971	0.0273205	643.971	0.0145737	643.971	0.0232734	643.971	0.0133902	643.971	0.0292123	643.971	0.0173306	643.971	0.0319852	643.971	0.0170318	643.971	0.031145	643.971	0.018404
642.946	0.00169485	642.946	0.0220357	642.946	0.0124377	642.946	0.0261436	642.946	0.0159899	642.946	0.0222754	642.946	0.0136364	642.946	0.0269933	642.946	0.0139633	642.946	0.0234286	642.946	0.0124171	642.946	0.0202681	642.946	0.0122116	642.946	0.0207874	642.946	0.0152084	642.946	0.0275377	642.946	0.0146138	642.946	0.0231718	642.946	0.0136126	642.946	0.0292788	642.946	0.0173049	642.946	0.0322831	642.946	0.0169771	642.946	0.0313018	642.946	0.0186305
642.067	0.00143851	642.067	0.0223505	642.067	0.0123435	642.067	0.0259714	642.067	0.0164133	642.067	0.0228975	642.067	0.0136762	642.067	0.0269658	642.067	0.0143908	642.067	0.023266	642.067	0.012328	642.067	0.0205051	642.067	0.0122951	642.067	0.0211373	642.067	0.0152473	642.067	0.0277943	642.067	0.0148016	642.067	0.0235072	642.067	0.0133609	642.067	0.0296589	642.067	0.0174426	642.067	0.0322617	642.067	0.0171796	642.067	0.0311974	642.067	0.0187425
641.041	0.00132048	641.041	0.0226975	641.041	0.012797	641.041	0.0259319	641.041	0.016266	641.041	0.022959	641.041	0.0137804	641.041	0.0274033	641.041	0.0143779	641.041	0.0234806	641.041	0.0127828	641.041	0.0206215	641.041	0.0120353	641.041	0.021302	641.041	0.0155031	641.041	0.0278044	641.041	0.0149242	641.041	0.0234041	641.041	0.0137897	641.041	0.029858	641.041	0.0174962	641.041	0.0327118	641.041	0.0171835	641.041	0.0312877	641.041	0.0189114
640.015	0.00141168	640.015	0.0226958	640.015	0.0125905	640.015	0.0261706	640.015	0.0165684	640.015	0.0233147	640.015	0.0138655	640.015	0.0271496	640.015	0.0146072	640.015	0.0234547	640.015	0.012661	640.015	0.0210164	640.015	0.0122864	640.015	0.0215792	640.015	0.0153384	640.015	0.0283179	640.015	0.0146856	640.015	0.024249	640.015	0.0136588	640.015	0.0298009	640.015	0.0173257	640.015	0.032451	640.015	0.0175935	640.015	0.0310002	640.015	0.0188729
638.989	0.00116864	638.989	0.0228977	638.989	0.0128059	638.989	0.0263943	638.989	0.0170028	638.989	0.0238089	638.989	0.0138429	638.989	0.0273708	638.989	0.0146241	638.989	0.023885	638.989	0.0129787	638.989	0.0208412	638.989	0.0122569	638.989	0.0215895	638.989	0.0154209	638.989	0.0282028	638.989	0.0150409	638.989	0.0239832	638.989	0.0138965	638.989	0.029995	638.989	0.0169513	638.989	0.0326341	638.989	0.0175125	638.989	0.03115	638.989	0.0188127
637.962	0.00157569	637.962	0.0230731	637.962	0.0126005	637.962	0.0263931	637.962	0.0170808	637.962	0.0238804	637.962	0.0139135	637.962	0.0274029	637.962	0.0147717	637.962	0.0241101	637.962	0.0125912	637.962	0.0214698	637.962	0.0123823	637.962	0.022157	637.962	0.0155551	637.962	0.0280856	637.962	0.0149763	637.962	0.0241029	637.962	0.0138447	637.962	0.0302857	637.962	0.0172782	637.962	0.0329344	637.962	0.0174397	637.962	0.0310486	637.962	0.0189533
636.935	0.00155506	636.935	0.023545	636.935	0.0128991	636.935	0.026257	636.935	0.0174417	636.935	0.0240823	636.935	0.014093	636.935	0.0280382	636.935	0.0148536	636.935	0.0243221	636.935	0.0127486	636.935	0.0214069	636.935	0.0129752	636.935	0.0227203	636.935	0.0159808	636.935	0.0282416	636.935	0.0150797	636.935	0.0241881	636.935	0.0142997	636.935	0.0304833	636.935	0.0171181	636.935	0.0331773	636.935	0.0175477	636.935	0.0309797	636.935	0.0192554
636.055	0.00167632	636.055	0.0235114	636.055	0.0130047	636.055	0.0268788	636.055	0.0175117	636.055	0.0241277	636.055	0.0143598	636.055	0.0281935	636.055	0.0147906	636.055	0.0244709	636.055	0.0129854	636.055	0.0219403	636.055	0.0126845	636.055	0.0225303	636.055	0.0157556	636.055	0.028585	636.055	0.0153576	636.055	0.0243535	636.055	0.0145201	636.055	0.0306309	636.055	0.0174847	636.055	0.0334971	636.055	0.0176027	636.055	0.0311068	636.055	0.0192113
635.027	0.00133803	635.027	0.0242203	635.027	0.0129931	635.027	0.0271353	635.027	0.0174529	635.027	0.0244576	635.027	0.0143042	635.027	0.0283114	635.027	0.0151224	635.027	0.0252466	635.027	0.0126099	635.027	0.0217474	635.027	0.0130649	635.027	0.0229438	635.027	0.015802	635.027	0.0278332	635.027	0.0152586	635.027	0.0242246	635.027	0.0142974	635.027	0.0308836	635.027	0.017473	635.027	0.0333692	635.027	0.017844	635.027	0.0313573	635.027	0.0194755
633.999	0.00168734	633.999	0.0240157	633.999	0.0132645	633.999	0.0271306	633.999	0.0174567	633.999	0.025018	633.999	0.01448	633.999	0.0286813	633.999	0.0150783	633.999	0.0250861	633.999	0.0127887	633.999	0.0223392	633.999	0.0129976	633.999	0.0233388	633.999	0.0160799	633.999	0.0278995	633.999	0.0154419	633.999	0.0246719	633.999	0.0143617	633.999	0.0308436	633.999	0.0170763	633.999	0.033984	633.999	0.0180945	633.999	0.0315949	633.999	0.0194366
632.971	0.00175886	632.971	0.0243056	632.971	0.013357	632.971	0.0274769	632.971	0.0180116	632.971	0.0250708	632.971	0.0144851	632.971	0.0288694	632.971	0.015253	632.971	0.0253772	632.971	0.0130758	632.971	0.022725	632.971	0.0131763	632.971	0.0236408	632.971	0.0161813	632.971	0.0281022	632.971	0.0155712	632.971	0.0247531	632.971	0.0147148	632.971	0.0313141	632.971	0.0173211	632.971	0.0341232	632.971	0.0178413	632.971	0.0316324	632.971	0.0192846
631.943	0.00156088	631.943	0.0246835	631.943	0.0130752	631.943	0.0272639	631.943	0.0180204	631.943	0.0254642	631.943	0.0147197	631.943	0.0294914	631.943	0.0155175	631.943	0.0255597	631.943	0.012961	631.943	0.0226276	631.943	0.0129868	631.943	0.0231766	631.943	0.0164373	631.943	0.0281755	631.943	0.0160614	631.943	0.0249931	631.943	0.0147549	631.943	0.0313679	631.943	0.0175572	631.943	0.0345021	631.943	0.017883	631.943	0.0315542	631.943	0.0194814
631.061	0.00175395	631.061	0.0247123	631.061	0.0133655	631.061	0.0280281	631.061	0.0185408	631.061	0.0261594	631.061	0.0149606	631.061	0.030051	631.061	0.015665	631.061	0.0260036	631.061	0.0134868	631.061	0.0229267	631.061	0.0134707	631.061	0.024162	631.061	0.0166956	631.061	0.0285683	631.061	0.0160444	631.061	0.0254726	631.061	0.0149116	631.061	0.0318955	631.061	0.0180526	631.061	0.03502	631.061	0.0183787	631.061	0.0322311	631.061	0.0199774
630.032	0.00176803	630.032	0.0254136	630.032	0.0137994	630.032	0.0282247	630.032	0.0186736	630.032	0.0264866	630.032	0.0150116	630.032	0.0303578	630.032	0.0157495	630.032	0.0263965	630.032	0.0135804	630.032	0.0232993	630.032	0.0134801	630.032	0.0242324	630.032	0.0167432	630.032	0.0290599	630.032	0.0162749	630.032	0.0253235	630.032	0.0152001	630.032	0.0319586	630.032	0.0178807	630.032	0.0354044	630.032	0.018417	630.032	0.032805	630.032	0.0199578
629.003	0.00207	629.003	0.0253431	629.003	0.01399	629.003	0.0283053	629.003	0.0189164	629.003	0.026706	629.003	0.0155678	629.003	0.0307194	629.003	0.016041	629.003	0.0265193	629.003	0.01399	629.003	0.0238603	629.003	0.0136957	629.003	0.0249314	629.003	0.0167474	629.003	0.0288456	629.003	0.0163829	629.003	0.0258901	629.003	0.0152987	629.003	0.0322243	629.003	0.0177168	629.003	0.0356381	629.003	0.0187797	629.003	0.0330226	629.003	0.0199229
627.973	0.00190095	627.973	0.0260014	627.973	0.0140267	627.973	0.0287664	627.973	0.0191593	627.973	0.0269461	627.973	0.0156327	627.973	0.0310056	627.973	0.016034	627.973	0.0265838	627.973	0.0135174	627.973	0.0239059	627.973	0.0134625	627.973	0.0249708	627.973	0.0172458	627.973	0.0288575	627.973	0.0168318	627.973	0.0259932	627.973	0.0158624	627.973	0.0324157	627.973	0.0178844	627.973	0.0362344	627.973	0.0190665	627.973	0.033346	627.973	0.0200159
626.943	0.0017881	626.943	0.0261398	626.943	0.0138502	626.943	0.0287344	626.943	0.0190088	626.943	0.0272971	626.943	0.0156707	626.943	0.0315247	626.943	0.0160296	626.943	0.026758	626.943	0.0136532	626.943	0.0240241	626.943	0.0138483	626.943	0.0251671	626.943	0.0174165	626.943	0.0291559	626.943	0.0166133	626.943	0.0261068	626.943	0.0156332	626.943	0.0326956	626.943	0.0180062	626.943	0.0364668	626.943	0.01886	626.943	0.0335093	626.943	0.0199399
626.061	0.00198062	626.061	0.0264059	626.061	0.0141715	626.061	0.0288691	626.061	0.0192642	626.061	0.0277353	626.061	0.015786	626.061	0.0315847	626.061	0.016208	626.061	0.0267539	626.061	0.013693	626.061	0.0243604	626.061	0.0137729	626.061	0.0256539	626.061	0.0172236	626.061	0.0290877	626.061	0.0166885	626.061	0.0263304	626.061	0.0158987	626.061	0.0327405	626.061	0.0181355	626.061	0.0365147	626.061	0.0188822	626.061	0.0339713	626.061	0.0204259
625.03	0.00149981	625.03	0.0263896	625.03	0.0140637	625.03	0.0291259	625.03	0.0193851	625.03	0.027978	625.03	0.0156321	625.03	0.0313614	625.03	0.0162969	625.03	0.027242	625.03	0.0132783	625.03	0.0244333	625.03	0.0135599	625.03	0.0258709	625.03	0.0171175	625.03	0.0290014	625.03	0.0165922	625.03	0.0263545	625.03	0.0155018	625.03	0.0330507	625.03	0.0182305	625.03	0.0366304	625.03	0.0188361	625.03	0.0343613	625.03	0.0203807
624	0.00161663	624	0.0268023	624	0.0141413	624	0.0297995	624	0.019631	624	0.0282723	624	0.0157011	624	0.0316161	624	0.0163643	624	0.0273254	624	0.0136436	624	0.0248226	624	0.0139848	624	0.0261338	624	0.0176609	624	0.0292481	624	0.0172598	624	0.0268299	624	0.0159513	624	0.0333492	624	0.0182837	624	0.0368787	624	0.0193443	624	0.0350462	624	0.0201012
622.969	0.0014135	622.969	0.0270808	622.969	0.0142471	622.969	0.0299085	622.969	0.0196061	622.969	0.0286722	622.969	0.0163522	622.969	0.0312413	622.969	0.0165951	622.969	0.0275551	622.969	0.0138043	622.969	0.0248541	622.969	0.0142248	622.969	0.0265744	622.969	0.0175748	622.969	0.0292393	622.969	0.0172812	622.969	0.027046	622.969	0.0160101	622.969	0.0331783	622.969	0.018359	622.969	0.0369867	622.969	0.0194098	622.969	0.035299	622.969	0.0207151
621.937	0.00174121	621.937	0.0275378	621.937	0.0143399	621.937	0.0306447	621.937	0.0199051	621.937	0.0288833	621.937	0.0160541	621.937	0.0321178	621.937	0.0166976	621.937	0.0278448	621.937	0.0139851	621.937	0.0251812	621.937	0.0142296	621.937	0.026541	621.937	0.0180925	621.937	0.0292929	621.937	0.0173323	621.937	0.0275173	621.937	0.0164216	621.937	0.0337243	621.937	0.0186423	621.937	0.0374106	621.937	0.0193017	621.937	0.0359464	621.937	0.0208036
621.053	0.00199302	621.053	0.0277495	621.053	0.0144494	621.053	0.0308423	621.053	0.0200855	621.053	0.0293647	621.053	0.0164501	621.053	0.0318925	621.053	0.0170302	621.053	0.0279008	621.053	0.0139749	621.053	0.0254708	621.053	0.0143418	621.053	0.0269316	621.053	0.0179187	621.053	0.0297161	621.053	0.0176305	621.053	0.0277714	621.053	0.0167426	621.053	0.0341637	621.053	0.018707	621.053	0.0378191	621.053	0.0196676	621.053	0.0362778	621.053	0.0209767
620.021	0.00172123	620.021	0.0282144	620.021	0.0144269	620.021	0.0312382	620.021	0.0204226	620.021	0.0297776	620.021	0.0165091	620.021	0.031797	620.021	0.01731	620.021	0.0281487	620.021	0.0143726	620.021	0.0257284	620.021	0.014471	620.021	0.0273849	620.021	0.0183195	620.021	0.0296001	620.021	0.0178133	620.021	0.0279475	620.021	0.0168102	620.021	0.0344298	620.021	0.019092	620.021	0.0377126	620.021	0.0198963	620.021	0.0364442	620.021	0.0208748
618.989	0.0019645	618.989	0.0281126	618.989	0.0149181	618.989	0.0319798	618.989	0.0203761	618.989	0.0300123	618.989	0.0169697	618.989	0.0321306	618.989	0.0175557	618.989	0.0287365	618.989	0.0144616	618.989	0.0263733	618.989	0.0147238	618.989	0.0278481	618.989	0.0188031	618.989	0.0302374	618.989	0.0181305	618.989	0.0281841	618.989	0.017128	618.989	0.0346901	618.989	0.0191909	618.989	0.0379595	618.989	0.0204936	618.989	0.0372238	618.989	0.0216305
617.957	0.00164784	617.957	0.0283863	617.957	0.0149654	617.957	0.0321044	617.957	0.0206473	617.957	0.0306233	617.957	0.0168247	617.957	0.0319964	617.957	0.0174988	617.957	0.0289082	617.957	0.0142821	617.957	0.0262545	617.957	0.0147802	617.957	0.0277794	617.957	0.0188664	617.957	0.0299711	617.957	0.0183418	617.957	0.0283888	617.957	0.0169465	617.957	0.0346983	617.957	0.0190663	617.957	0.038118	617.957	0.0202488	617.957	0.0371243	617.957	0.0215368
617.072	0.00182062	617.072	0.0289211	617.072	0.0151962	617.072	0.0326487	617.072	0.0210326	617.072	0.0309869	617.072	0.0174462	617.072	0.0322319	617.072	0.0180241	617.072	0.0290405	617.072	0.0144314	617.072	0.0265454	617.072	0.0151714	617.072	0.0283953	617.072	0.0190753	617.072	0.0304358	617.072	0.0186969	617.072	0.0289833	617.072	0.0171854	617.072	0.0356113	617.072	0.0194272	617.072	0.0386828	617.072	0.0208791	617.072	0.0383945	617.072	0.021755
616.039	0.00178098	616.039	0.0293458	616.039	0.0153612	616.039	0.0330532	616.039	0.0208817	616.039	0.0315203	616.039	0.017649	616.039	0.0326266	616.039	0.0181376	616.039	0.029582	616.039	0.0150645	616.039	0.0271305	616.039	0.015112	616.039	0.0288772	616.039	0.0192394	616.039	0.0305408	616.039	0.0187135	616.039	0.0292177	616.039	0.0175504	616.039	0.0355554	616.039	0.0199599	616.039	0.0390337	616.039	0.0207669	616.039	0.038691	616.039	0.0217476
615.005	0.00185641	615.005	0.0294037	615.005	0.0153244	615.005	0.033744	615.005	0.0212335	615.005	0.0319063	615.005	0.0177718	615.005	0.0323574	615.005	0.018384	615.005	0.029787	615.005	0.0153769	615.005	0.0273044	615.005	0.0155539	615.005	0.0290261	615.005	0.0195083	615.005	0.0310736	615.005	0.0187933	615.005	0.0297842	615.005	0.0176732	615.005	0.0358225	615.005	0.0199074	615.005	0.0393063	615.005	0.0211738	615.005	0.0391698	615.005	0.0220923
613.972	0.00178597	613.972	0.0300838	613.972	0.0155379	613.972	0.0341628	613.972	0.02135	613.972	0.0324132	613.972	0.01787	613.972	0.0325812	613.972	0.0184135	613.972	0.0302224	613.972	0.0148661	613.972	0.0275473	613.972	0.0154533	613.972	0.0291786	613.972	0.0195141	613.972	0.0315878	613.972	0.018731	613.972	0.0298915	613.972	0.0178	613.972	0.0363826	613.972	0.0199237	613.972	0.0392251	613.972	0.0214121	613.972	0.03958	613.972	0.0222352
612.938	0.00191028	612.938	0.0301178	612.938	0.015462	612.938	0.0347237	612.938	0.0212296	612.938	0.0330909	612.938	0.0178855	612.938	0.0320616	612.938	0.0188055	612.938	0.0304861	612.938	0.0152327	612.938	0.027946	612.938	0.0155527	612.938	0.0294958	612.938	0.0199664	612.938	0.0316513	612.938	0.0190665	612.938	0.0302566	612.938	0.0181511	612.938	0.0364595	612.938	0.0201721	612.938	0.039513	612.938	0.021476	612.938	0.0396883	612.938	0.0222913
612.052	0.00191062	612.052	0.03047	612.052	0.0155347	612.052	0.0350605	612.052	0.0215677	612.052	0.0331738	612.052	0.017813	612.052	0.0327687	612.052	0.0187975	612.052	0.0306531	612.052	0.0153566	612.052	0.028355	612.052	0.0158935	612.052	0.0299297	612.052	0.0200511	612.052	0.0322523	612.052	0.0192944	612.052	0.0305432	612.052	0.0182721	612.052	0.0368065	612.052	0.0205099	612.052	0.0395834	612.052	0.0214886	612.052	0.0401981	612.052	0.0225713
611.017	0.00195716	611.017	0.0312132	611.017	0.0157087	611.017	0.0354613	611.017	0.0214019	611.017	0.033674	611.017	0.0182679	611.017	0.0324933	611.017	0.019163	611.017	0.0310619	611.017	0.0152084	611.017	0.0284875	611.017	0.0158805	611.017	0.0303266	611.017	0.0202241	611.017	0.0325897	611.017	0.0193169	611.017	0.0308075	611.017	0.018236	611.017	0.0372594	611.017	0.0204292	611.017	0.0397193	611.017	0.0216591	611.017	0.0404733	611.017	0.0225234
609.983	0.00160634	609.983	0.0312309	609.983	0.0156719	609.983	0.03581	609.983	0.0213802	609.983	0.0340487	609.983	0.0179972	609.983	0.0326702	609.983	0.0191782	609.983	0.031156	609.983	0.015397	609.983	0.0287788	609.983	0.0158872	609.983	0.0304526	609.983	0.020112	609.983	0.0326153	609.983	0.0192632	609.983	0.0309813	609.983	0.0184492	609.983	0.0372838	609.983	0.0205437	609.983	0.0397408	609.983	0.0217641	609.983	0.0409059	609.983	0.0225345
608.948	0.00159964	608.948	0.0313685	608.948	0.0155763	608.948	0.036118	608.948	0.0213222	608.948	0.0343494	608.948	0.0180221	608.948	0.0326808	608.948	0.0190995	608.948	0.0311174	608.948	0.0154138	608.948	0.0286349	608.948	0.0157366	608.948	0.030606	608.948	0.0200771	608.948	0.0331556	608.948	0.0194316	608.948	0.0313625	608.948	0.0184656	608.948	0.0372473	608.948	0.0206269	608.948	0.0398064	608.948	0.0220938	608.948	0.0412817	608.948	0.0225062
608.061	0.00179891	608.061	0.0318042	608.061	0.0158128	608.061	0.0367282	608.061	0.021588	608.061	0.0349065	608.061	0.0181993	608.061	0.0330816	608.061	0.0195246	608.061	0.0316202	608.061	0.0156202	608.061	0.0291725	608.061	0.0159204	608.061	0.0308567	608.061	0.0205633	608.061	0.0336949	608.061	0.0195748	608.061	0.0315674	608.061	0.0187381	608.061	0.0378967	608.061	0.0208014	608.061	0.040168	608.061	0.0222675	608.061	0.0414309	608.061	0.0229044
607.025	0.00154703	607.025	0.0322275	607.025	0.0158367	607.025	0.0372811	607.025	0.0216827	607.025	0.0354184	607.025	0.0182801	607.025	0.0330084	607.025	0.0198884	607.025	0.0320164	607.025	0.0158386	607.025	0.0293531	607.025	0.0162174	607.025	0.0313876	607.025	0.0207077	607.025	0.0342886	607.025	0.0198444	607.025	0.0321846	607.025	0.0188999	607.025	0.0384175	607.025	0.0211629	607.025	0.0406486	607.025	0.0224528	607.025	0.0416608	607.025	0.0230698
605.989	0.00159286	605.989	0.0324502	605.989	0.0160695	605.989	0.0376663	605.989	0.0216762	605.989	0.0358047	605.989	0.0184251	605.989	0.0329936	605.989	0.0198601	605.989	0.0321113	605.989	0.015901	605.989	0.0297371	605.989	0.0163807	605.989	0.03154	605.989	0.0207709	605.989	0.0345089	605.989	0.0199748	605.989	0.0324774	605.989	0.0189821	605.989	0.0387893	605.989	0.0211352	605.989	0.040693	605.989	0.0222311	605.989	0.0418191	605.989	0.0231891
604.953	0.00136982	604.953	0.0325062	604.953	0.0158347	604.953	0.0374844	604.953	0.0215373	604.953	0.036049	604.953	0.0180402	604.953	0.0333362	604.953	0.0196624	604.953	0.0322384	604.953	0.0157987	604.953	0.0299416	604.953	0.0160712	604.953	0.0315738	604.953	0.0207864	604.953	0.0349661	604.953	0.0197412	604.953	0.0325955	604.953	0.0187045	604.953	0.0385525	604.953	0.0211954	604.953	0.040985	604.953	0.0224725	604.953	0.0417796	604.953	0.0229742
604.065	0.00134107	604.065	0.0327324	604.065	0.0156671	604.065	0.0376044	604.065	0.0216593	604.065	0.036468	604.065	0.0181354	604.065	0.0331121	604.065	0.0194387	604.065	0.0320424	604.065	0.015787	604.065	0.0298931	604.065	0.0160776	604.065	0.0317251	604.065	0.0209245	604.065	0.0349482	604.065	0.0198859	604.065	0.0328067	604.065	0.0186966	604.065	0.0386939	604.065	0.0214062	604.065	0.0411256	604.065	0.0225088	604.065	0.0420069	604.065	0.022892
603.029	0.0010333	603.029	0.0330615	603.029	0.0158842	603.029	0.0379229	603.029	0.0214667	603.029	0.0369438	603.029	0.0182418	603.029	0.0332373	603.029	0.0195869	603.029	0.0324726	603.029	0.0156051	603.029	0.03042	603.029	0.016097	603.029	0.0320575	603.029	0.0209171	603.029	0.0355581	603.029	0.0200179	603.029	0.0330529	603.029	0.0185696	603.029	0.0392878	603.029	0.0212508	603.029	0.0416656	603.029	0.0225913	603.029	0.0422324	603.029	0.0229836
601.992	0.00112761	601.992	0.0336514	601.992	0.0158572	601.992	0.0386631	601.992	0.0213081	601.992	0.0374091	601.992	0.0181265	601.992	0.0333793	601.992	0.0198518	601.992	0.0327042	601.992	0.0158774	601.992	0.0303766	601.992	0.0162455	601.992	0.0324298	601.992	0.0211315	601.992	0.0360391	601.992	0.0199584	601.992	0.0337741	601.992	0.0187204	601.992	0.0397882	601.992	0.0216354	601.992	0.0420046	601.992	0.0227659	601.992	0.042572	601.992	0.0231569
600.955	0.000967685	600.955	0.0339378	600.955	0.0158141	600.955	0.0383104	600.955	0.0215397	600.955	0.0378445	600.955	0.0180344	600.955	0.033296	600.955	0.0198491	600.955	0.0326397	600.955	0.0157799	600.955	0.0308017	600.955	0.0163306	600.955	0.0328043	600.955	0.0212986	600.955	0.0366248	600.955	0.020145	600.955	0.0340361	600.955	0.0188359	600.955	0.0400975	600.955	0.0217615	600.955	0.0420783	600.955	0.0226858	600.955	0.0433038	600.955	0.0232942
600.065	0.000916138	600.065	0.0341296	600.065	0.0157516	600.065	0.0386227	600.065	0.0213108	600.065	0.037975	600.065	0.0181162	600.065	0.0336705	600.065	0.01989	600.065	0.0327447	600.065	0.0157674	600.065	0.0308244	600.065	0.016128	600.065	0.0329854	600.065	0.0213701	600.065	0.0368153	600.065	0.0199516	600.065	0.0344306	600.065	0.0186689	600.065	0.0400859	600.065	0.0216486	600.065	0.0421225	600.065	0.0228595	600.065	0.0432114	600.065	0.0233994
599.028	0.000876036	599.028	0.0344818	599.028	0.0157181	599.028	0.0391682	599.028	0.0213709	599.028	0.038646	599.028	0.0180927	599.028	0.0336465	599.028	0.0201941	599.028	0.0331174	599.028	0.0159553	599.028	0.0311677	599.028	0.0163594	599.028	0.0331856	599.028	0.0211999	599.028	0.0375006	599.028	0.0201022	599.028	0.0351347	599.028	0.0188095	599.028	0.0409827	599.028	0.0219729	599.028	0.0423622	599.028	0.0226838	599.028	0.0435032	599.028	0.0233401
597.99	0.000548274	597.99	0.0348777	597.99	0.015656	597.99	0.039424	597.99	0.0212567	597.99	0.0392051	597.99	0.0180286	597.99	0.0334928	597.99	0.0201819	597.99	0.0331765	597.99	0.015818	597.99	0.031257	597.99	0.0163087	597.99	0.0334603	597.99	0.0211669	597.99	0.0379019	597.99	0.0198862	597.99	0.0351759	597.99	0.0187766	597.99	0.0411698	597.99	0.022039	597.99	0.0429839	597.99	0.022862	597.99	0.0439759	597.99	0.0233249
596.952	0.000164511	596.952	0.0347803	596.952	0.0152202	596.952	0.0396206	596.952	0.0210296	596.952	0.0393896	596.952	0.0176092	596.952	0.0335502	596.952	0.0195981	596.952	0.0332307	596.952	0.0156941	596.952	0.0314209	596.952	0.0162542	596.952	0.0334131	596.952	0.0212205	596.952	0.0381894	596.952	0.019788	596.952	0.0353756	596.952	0.0185007	596.952	0.0408212	596.952	0.0218766	596.952	0.0431075	596.952	0.0226959	596.952	0.0442196	596.952	0.0231171
596.061	0.000162465	596.061	0.0354957	596.061	0.0152609	596.061	0.0398676	596.061	0.0209274	596.061	0.0398799	596.061	0.0175357	596.061	0.0333575	596.061	0.01956	596.061	0.0331625	596.061	0.0156989	596.061	0.031645	596.061	0.0159655	596.061	0.0339525	596.061	0.0209868	596.061	0.038631	596.061	0.0197053	596.061	0.0356844	596.061	0.0185383	596.061	0.0412239	596.061	0.0220639	596.061	0.0431788	596.061	0.0227066	596.061	0.0444786	596.061	0.0231639
595.023	-0.000242225	595.023	0.035443	595.023	0.0152113	595.023	0.0401624	595.023	0.0210497	595.023	0.0404932	595.023	0.01767	595.023	0.0331975	595.023	0.0195192	595.023	0.0336744	595.023	0.0158544	595.023	0.0315961	595.023	0.0159204	595.023	0.0340493	595.023	0.0212264	595.023	0.0392341	595.023	0.019731	595.023	0.0362745	595.023	0.0185997	595.023	0.0416292	595.023	0.0219315	595.023	0.043437	595.023	0.0225424	595.023	0.0450351	595.023	0.0231646
593.984	-0.000186649	593.984	0.0360641	593.984	0.0152858	593.984	0.0406125	593.984	0.0208015	593.984	0.0408439	593.984	0.0173608	593.984	0.0336116	593.984	0.0195492	593.984	0.0336452	593.984	0.0155676	593.984	0.0318476	593.984	0.0160532	593.984	0.0344779	593.984	0.0212046	593.984	0.0396493	593.984	0.0197006	593.984	0.0367211	593.984	0.0182291	593.984	0.0420725	593.984	0.0220309	593.984	0.0438879	593.984	0.0226549	593.984	0.0454746	593.984	0.0232609
592.944	-0.0001985	592.944	0.0366239	592.944	0.0150966	592.944	0.0410265	592.944	0.0207493	592.944	0.041565	592.944	0.017273	592.944	0.0334769	592.944	0.0198891	592.944	0.0337721	592.944	0.0156969	592.944	0.0320703	592.944	0.0161185	592.944	0.0348993	592.944	0.0212597	592.944	0.0402698	592.944	0.0197043	592.944	0.0371847	592.944	0.0184392	592.944	0.0426424	592.944	0.0222566	592.944	0.0447371	592.944	0.0225279	592.944	0.0456991	592.944	0.0231044
592.053	-0.000520669	592.053	0.0371022	592.053	0.0150011	592.053	0.0418231	592.053	0.0207467	592.053	0.0423058	592.053	0.0172772	592.053	0.0334689	592.053	0.0197876	592.053	0.0339161	592.053	0.015884	592.053	0.032155	592.053	0.0160023	592.053	0.0354365	592.053	0.0214311	592.053	0.0408854	592.053	0.0198029	592.053	0.0377987	592.053	0.01845	592.053	0.0430292	592.053	0.0221429	592.053	0.0448573	592.053	0.0226173	592.053	0.0461515	592.053	0.0233679
591.013	-0.000722704	591.013	0.0373265	591.013	0.0151088	591.013	0.0423441	591.013	0.020506	591.013	0.0429287	591.013	0.0171368	591.013	0.0333909	591.013	0.0196516	591.013	0.034053	591.013	0.0157642	591.013	0.0325627	591.013	0.0160744	591.013	0.0357475	591.013	0.0214277	591.013	0.0413201	591.013	0.0197995	591.013	0.0384135	591.013	0.0184359	591.013	0.0435813	591.013	0.0222472	591.013	0.0456823	591.013	0.0224903	591.013	0.0465768	591.013	0.0230303
589.973	-0.00098741	589.973	0.0377089	589.973	0.0150084	589.973	0.0428916	589.973	0.0204191	589.973	0.0435191	589.973	0.0171611	589.973	0.0336144	589.973	0.0194872	589.973	0.0344863	589.973	0.0157503	589.973	0.0326078	589.973	0.0158131	589.973	0.0360221	589.973	0.0213585	589.973	0.0420903	589.973	0.0197036	589.973	0.0388369	589.973	0.018057	589.973	0.043946	589.973	0.0220734	589.973	0.0461857	589.973	0.0224583	589.973	0.0469544	589.973	0.0231094
588.933	-0.00113481	588.933	0.0384102	588.933	0.0148791	588.933	0.0441411	588.933	0.0205404	588.933	0.0444103	588.933	0.0170503	588.933	0.0336281	588.933	0.0196639	588.933	0.0346127	588.933	0.015548	588.933	0.0325308	588.933	0.015816	588.933	0.0366746	588.933	0.0212629	588.933	0.0426298	588.933	0.0198148	588.933	0.0395735	588.933	0.0181141	588.933	0.0447703	588.933	0.0221776	588.933	0.0467653	588.933	0.0224927	588.933	0.0473271	588.933	0.0228031
588.041	-0.001378	588.041	0.0386792	588.041	0.0148432	588.041	0.0444996	588.041	0.0205717	588.041	0.045096	588.041	0.016915	588.041	0.0336753	588.041	0.0195374	588.041	0.0348648	588.041	0.0157441	588.041	0.0327708	588.041	0.0160083	588.041	0.0370518	588.041	0.0215341	588.041	0.0429481	588.041	0.0196559	588.041	0.0401138	588.041	0.0182171	588.041	0.0449151	588.041	0.0220753	588.041	0.0470778	588.041	0.0225106	588.041	0.0480217	588.041	0.0230044
587	-0.00176484	587	0.0394148	587	0.0146871	587	0.0457189	587	0.0204924	587	0.0455828	587	0.0170023	587	0.0339719	587	0.0194117	587	0.0350296	587	0.0154296	587	0.0331391	587	0.0157189	587	0.0376568	587	0.0216074	587	0.0434319	587	0.0195943	587	0.0405611	587	0.0181907	587	0.04549	587	0.0220926	587	0.0480849	587	0.0222293	587	0.0486059	587	0.0229827
585.959	-0.001948	585.959	0.0398583	585.959	0.0147478	585.959	0.0466517	585.959	0.0202373	585.959	0.0464916	585.959	0.0168445	585.959	0.0339747	585.959	0.0193255	585.959	0.0351412	585.959	0.0154905	585.959	0.0332373	585.959	0.0159234	585.959	0.0381624	585.959	0.0215132	585.959	0.0439817	585.959	0.0195564	585.959	0.0416915	585.959	0.0179866	585.959	0.0460249	585.959	0.0221764	585.959	0.0486426	585.959	0.0225223	585.959	0.0492129	585.959	0.0231201
585.066	-0.00202015	585.066	0.0403065	585.066	0.0144723	585.066	0.0472632	585.066	0.0202287	585.066	0.04695	585.066	0.0165909	585.066	0.0341275	585.066	0.0192864	585.066	0.0353018	585.066	0.0155534	585.066	0.0331689	585.066	0.0155416	585.066	0.0385862	585.066	0.0216965	585.066	0.0443881	585.066	0.0196642	585.066	0.0422149	585.066	0.0181992	585.066	0.0467387	585.066	0.0223585	585.066	0.0494331	585.066	0.0221199	585.066	0.0498652	585.066	0.0229008
584.025	-0.00241027	584.025	0.0410975	584.025	0.0145973	584.025	0.0482363	584.025	0.0204561	584.025	0.0481977	584.025	0.0168832	584.025	0.0342969	584.025	0.0192795	584.025	0.0357225	584.025	0.0152835	584.025	0.0335247	584.025	0.0156686	584.025	0.0394679	584.025	0.0220433	584.025	0.0451614	584.025	0.0196654	584.025	0.0430333	584.025	0.0179056	584.025	0.0473164	584.025	0.0222162	584.025	0.04989	584.025	0.0223502	584.025	0.0506876	584.025	0.0230729
582.983	-0.00253902	582.983	0.0417043	582.983	0.0143701	582.983	0.0492727	582.983	0.0202727	582.983	0.0493988	582.983	0.0167211	582.983	0.0343254	582.983	0.0193352	582.983	0.0359671	582.983	0.0154025	582.983	0.033811	582.983	0.0157894	582.983	0.0398378	582.983	0.021806	582.983	0.0458176	582.983	0.0195967	582.983	0.0439837	582.983	0.0181362	582.983	0.0476217	582.983	0.0222517	582.983	0.0508356	582.983	0.0221288	582.983	0.0514605	582.983	0.0226884
581.94	-0.00288332	581.94	0.0422259	581.94	0.0145249	581.94	0.0498774	581.94	0.0199893	581.94	0.0499476	581.94	0.0166291	581.94	0.0343509	581.94	0.0193117	581.94	0.0361391	581.94	0.0151736	581.94	0.034089	581.94	0.0153371	581.94	0.0404526	581.94	0.0220234	581.94	0.0462543	581.94	0.0196155	581.94	0.044656	581.94	0.0182824	581.94	0.0483379	581.94	0.02247	581.94	0.0515469	581.94	0.0224441	581.94	0.0519998	581.94	0.0230218
581.047	-0.00306586	581.047	0.0426974	581.047	0.0144336	581.047	0.0504613	581.047	0.0201908	581.047	0.0506718	581.047	0.0166934	581.047	0.0343788	581.047	0.0190146	581.047	0.0363357	581.047	0.0153591	581.047	0.0340633	581.047	0.0155045	581.047	0.0411387	581.047	0.0221968	581.047	0.0466492	581.047	0.0198552	581.047	0.0453397	581.047	0.0182955	581.047	0.048709	581.047	0.0224041	581.047	0.0520413	581.047	0.0225859	581.047	0.0525343	581.047	0.0229677
580.004	-0.00335801	580.004	0.0432544	580.004	0.0142635	580.004	0.0512649	580.004	0.0199603	580.004	0.0514897	580.004	0.016662	580.004	0.034601	580.004	0.0190774	580.004	0.036528	580.004	0.0150556	580.004	0.0340975	580.004	0.0155309	580.004	0.0416459	580.004	0.0221514	580.004	0.0474293	580.004	0.0197555	580.004	0.0462626	580.004	0.018171	580.004	0.0494134	580.004	0.0225356	580.004	0.0528144	580.004	0.0224509	580.004	0.0536316	580.004	0.0229005
578.961	-0.00399462	578.961	0.0440676	578.961	0.0142511	578.961	0.052043	578.961	0.0201504	578.961	0.052743	578.961	0.0166344	578.961	0.0347256	578.961	0.0190534	578.961	0.0366749	578.961	0.0150618	578.961	0.0344822	578.961	0.0154457	578.961	0.0422513	578.961	0.0223199	578.961	0.0478778	578.961	0.0197661	578.961	0.0473724	578.961	0.0182269	578.961	0.050324	578.961	0.0222867	578.961	0.0536985	578.961	0.022528	578.961	0.0544379	578.961	0.0230458
578.067	-0.00404284	578.067	0.0446753	578.067	0.014296	578.067	0.0525957	578.067	0.0201541	578.067	0.0531562	578.067	0.0165889	578.067	0.0346365	578.067	0.0190544	578.067	0.0367746	578.067	0.0150854	578.067	0.0346191	578.067	0.0154468	578.067	0.0427448	578.067	0.0224826	578.067	0.0484076	578.067	0.0201372	578.067	0.047892	578.067	0.0181403	578.067	0.0505522	578.067	0.0226723	578.067	0.0541093	578.067	0.0224995	578.067	0.0550361	578.067	0.0232835
577.023	-0.00440712	577.023	0.0450235	577.023	0.0144334	577.023	0.0532147	577.023	0.020163	577.023	0.0539888	577.023	0.0167883	577.023	0.0346548	577.023	0.0189754	577.023	0.0371713	577.023	0.0151533	577.023	0.0345044	577.023	0.0156266	577.023	0.0432642	577.023	0.0226335	577.023	0.0488438	577.023	0.0202106	577.023	0.0487918	577.023	0.018556	577.023	0.0508737	577.023	0.0227574	577.023	0.0548025	577.023	0.0226872	577.023	0.0559376	577.023	0.0234129
575.98	-0.00462974	575.98	0.0454028	575.98	0.0142409	575.98	0.0536452	575.98	0.0201396	575.98	0.0548418	575.98	0.0168589	575.98	0.0344983	575.98	0.0189773	575.98	0.0371292	575.98	0.0150343	575.98	0.034923	575.98	0.0155925	575.98	0.0436621	575.98	0.0228003	575.98	0.0490794	575.98	0.020257	575.98	0.0491377	575.98	0.0183664	575.98	0.0512758	575.98	0.0227004	575.98	0.0551364	575.98	0.0227887	575.98	0.0563965	575.98	0.023294
574.936	-0.0056303	574.936	0.0453892	574.936	0.0137457	574.936	0.0534066	574.936	0.0198352	574.936	0.0550242	574.936	0.0164877	574.936	0.0341206	574.936	0.0183587	574.936	0.0368118	574.936	0.0145049	574.936	0.0344396	574.936	0.0149884	574.936	0.0434413	574.936	0.0226733	574.936	0.04881	574.936	0.0200191	574.936	0.0492295	574.936	0.0180955	574.936	0.0511556	574.936	0.0222969	574.936	0.0553077	574.936	0.0224852	574.936	0.0566998	574.936	0.0230891
574.04	-0.00590337	574.04	0.0457761	574.04	0.0139719	574.04	0.0539724	574.04	0.0200133	574.04	0.0556871	574.04	0.0167521	574.04	0.0339138	574.04	0.018532	574.04	0.0369277	574.04	0.0147278	574.04	0.0346237	574.04	0.0151914	574.04	0.0439817	574.04	0.0230054	574.04	0.0493406	574.04	0.0203353	574.04	0.049958	574.04	0.0183571	574.04	0.0515717	574.04	0.0227691	574.04	0.055795	574.04	0.0226987	574.04	0.0574211	574.04	0.0231667
572.996	-0.00631809	572.996	0.0461361	572.996	0.0144	572.996	0.0543244	572.996	0.0203481	572.996	0.056169	572.996	0.0169047	572.996	0.0339407	572.996	0.0186735	572.996	0.0370533	572.996	0.0150077	572.996	0.0345294	572.996	0.0151472	572.996	0.0442524	572.996	0.02351	572.996	0.0497668	572.996	0.0205799	572.996	0.0504094	572.996	0.0187993	572.996	0.052014	572.996	0.02281	572.996	0.0563037	572.996	0.023128	572.996	0.0580951	572.996	0.0237785
571.951	-0.00673104	571.951	0.0463188	571.951	0.0145024	571.951	0.0543962	571.951	0.0205044	571.951	0.0566831	571.951	0.017263	571.951	0.0338475	571.951	0.0186223	571.951	0.0370082	571.951	0.0148627	571.951	0.0344368	571.951	0.0152333	571.951	0.0445772	571.951	0.0238824	571.951	0.0500797	571.951	0.0210362	571.951	0.050703	571.951	0.0192321	571.951	0.0517999	571.951	0.0232074	571.951	0.0568989	571.951	0.0233955	571.951	0.0585938	571.951	0.0239061
571.055	-0.00719462	571.055	0.0465167	571.055	0.0150236	571.055	0.0546682	571.055	0.0207996	571.055	0.0570211	571.055	0.0178611	571.055	0.033642	571.055	0.0188605	571.055	0.0371241	571.055	0.0152186	571.055	0.0344489	571.055	0.0157064	571.055	0.0447846	571.055	0.0246676	571.055	0.0501629	571.055	0.0212933	571.055	0.0510136	571.055	0.0195503	571.055	0.0522907	571.055	0.023434	571.055	0.0570937	571.055	0.0238943	571.055	0.0590196	571.055	0.0243633
570.01	-0.00695522	570.01	0.0471583	570.01	0.0160039	570.01	0.0553056	570.01	0.0218565	570.01	0.0580579	570.01	0.0190224	570.01	0.0339275	570.01	0.0197862	570.01	0.0375975	570.01	0.0160775	570.01	0.0352841	570.01	0.0164883	570.01	0.0455146	570.01	0.0260049	570.01	0.0510609	570.01	0.022611	570.01	0.0519219	570.01	0.0206756	570.01	0.0529336	570.01	0.0245516	570.01	0.0580589	570.01	0.0250556	570.01	0.0600744	570.01	0.0257526
568.964	-0.00726305	568.964	0.0473694	568.964	0.016906	568.964	0.0555187	568.964	0.0226836	568.964	0.0584555	568.964	0.0200248	568.964	0.0340597	568.964	0.0202902	568.964	0.0377577	568.964	0.0167617	568.964	0.0351344	568.964	0.0171798	568.964	0.0456998	568.964	0.0269993	568.964	0.0513081	568.964	0.0236608	568.964	0.0522076	568.964	0.0216431	568.964	0.0534757	568.964	0.025185	568.964	0.0584216	568.964	0.0259945	568.964	0.060581	568.964	0.0264219
568.068	-0.00752818	568.068	0.0477663	568.068	0.0177869	568.068	0.0558241	568.068	0.0237839	568.068	0.0588571	568.068	0.02089	568.068	0.0339646	568.068	0.0209423	568.068	0.0377827	568.068	0.0174612	568.068	0.0352513	568.068	0.018036	568.068	0.046015	568.068	0.0282186	568.068	0.0516361	568.068	0.0247374	568.068	0.0526712	568.068	0.0228874	568.068	0.0538199	568.068	0.0260989	568.068	0.0586507	568.068	0.0269844	568.068	0.0608918	568.068	0.0275231
567.022	-0.00781028	567.022	0.0476958	567.022	0.0190266	567.022	0.0559889	567.022	0.0251397	567.022	0.0590884	567.022	0.022467	567.022	0.0336653	567.022	0.0217538	567.022	0.037737	567.022	0.0183053	567.022	0.0353058	567.022	0.0188659	567.022	0.0463307	567.022	0.0297861	567.022	0.0515861	567.022	0.0260885	567.022	0.0527884	567.022	0.0240805	567.022	0.053816	567.022	0.0271169	567.022	0.0590359	567.022	0.0283273	567.022	0.061171	567.022	0.0288198
565.975	-0.00823669	565.975	0.0476618	565.975	0.0207559	565.975	0.0561727	565.975	0.0269719	565.975	0.0592375	565.975	0.0243801	565.975	0.0335161	565.975	0.0224985	565.975	0.0377559	565.975	0.0194808	565.975	0.035139	565.975	0.0199126	565.975	0.0464213	565.975	0.031686	565.975	0.0519009	565.975	0.0276093	565.975	0.0530439	565.975	0.0257583	565.975	0.0535002	565.975	0.0286672	565.975	0.0593219	565.975	0.0299454	565.975	0.0615282	565.975	0.030686
564.929	-0.00837744	564.929	0.0479848	564.929	0.0234326	564.929	0.0563647	564.929	0.030018	564.929	0.0595875	564.929	0.0275429	564.929	0.0336434	564.929	0.0241905	564.929	0.0380269	564.929	0.0212909	564.929	0.0353015	564.929	0.0217301	564.929	0.0466198	564.929	0.0347271	564.929	0.0520282	564.929	0.0304563	564.929	0.0534892	564.929	0.0284322	564.929	0.0540548	564.929	0.030507	564.929	0.0596891	564.929	0.0327684	564.929	0.0620599	564.929	0.0332859
564.031	-0.00859133	564.031	0.0483797	564.031	0.025575	564.031	0.0568541	564.031	0.0322985	564.031	0.0600532	564.031	0.0300736	564.031	0.0336064	564.031	0.0254214	564.031	0.0382065	564.031	0.022795	564.031	0.0355281	564.031	0.0233925	564.031	0.0467931	564.031	0.0371762	564.031	0.0519592	564.031	0.0327245	564.031	0.053538	564.031	0.0308312	564.031	0.0541893	564.031	0.0324523	564.031	0.0600389	564.031	0.0350759	564.031	0.0624313	564.031	0.0355348
562.984	-0.00873957	562.984	0.0484364	562.984	0.028951	562.984	0.0571594	562.984	0.0357095	562.984	0.0605156	562.984	0.0340835	562.984	0.0336338	562.984	0.0274393	562.984	0.0383947	562.984	0.0251245	562.984	0.0357679	562.984	0.025533	562.984	0.047057	562.984	0.0407894	562.984	0.0523816	562.984	0.0361385	562.984	0.0539815	562.984	0.0342739	562.984	0.0545006	562.984	0.0351418	562.984	0.0604674	562.984	0.0381159	562.984	0.062768	562.984	0.0388514
561.937	-0.00889719	561.937	0.0486651	561.937	0.0325868	561.937	0.0576995	561.937	0.0399916	561.937	0.0606526	561.937	0.0383248	561.937	0.0335133	561.937	0.0293705	561.937	0.0384375	561.937	0.0275289	561.937	0.0357026	561.937	0.0278435	561.937	0.047389	561.937	0.0446452	561.937	0.0523357	561.937	0.0398251	561.937	0.0542637	561.937	0.0377444	561.937	0.0547579	561.937	0.0379419	561.937	0.0606162	561.937	0.0420571	561.937	0.0635067	561.937	0.0425528
561.039	-0.00915118	561.039	0.0489841	561.039	0.0372513	561.039	0.0577602	561.039	0.0450996	561.039	0.0611085	561.039	0.0438859	561.039	0.0334345	561.039	0.031776	561.039	0.0386778	561.039	0.0304372	561.039	0.0357157	561.039	0.0306907	561.039	0.0474674	561.039	0.049453	561.039	0.0526184	561.039	0.044377	561.039	0.0545657	561.039	0.0423479	561.039	0.0548803	561.039	0.0417367	561.039	0.0608673	561.039	0.0465691	561.039	0.0638556	561.039	0.0473383
559.991	-0.00914485	559.991	0.0494573	559.991	0.0432448	559.991	0.0585229	559.991	0.0519117	559.991	0.0618283	559.991	0.0512606	559.991	0.033736	559.991	0.0349034	559.991	0.0389544	559.991	0.0338761	559.991	0.0361453	559.991	0.0343275	559.991	0.0481885	559.991	0.0557252	559.991	0.0529	559.991	0.050419	559.991	0.0551414	559.991	0.0483744	559.991	0.0554085	559.991	0.0468275	559.991	0.0616176	559.991	0.053077	559.991	0.0646702	559.991	0.0537533
558.943	-0.00913243	558.943	0.0498537	558.943	0.0493552	558.943	0.0588919	558.943	0.0592777	558.943	0.0621814	558.943	0.0592216	558.943	0.03398	558.943	0.0376835	558.943	0.039085	558.943	0.0377233	558.943	0.0363868	558.943	0.0378612	558.943	0.048746	558.943	0.0623155	558.943	0.053148	558.943	0.0567323	558.943	0.0556114	558.943	0.0546493	558.943	0.0558224	558.943	0.0521015	558.943	0.0620657	558.943	0.0597093	558.943	0.0652377	558.943	0.0608438
558.044	-0.0092449	558.044	0.0502362	558.044	0.055209	558.044	0.0592625	558.044	0.0660304	558.044	0.0627805	558.044	0.0670185	558.044	0.0342038	558.044	0.0404297	558.044	0.0395483	558.044	0.0406964	558.044	0.0368512	558.044	0.0411481	558.044	0.0490325	558.044	0.0681479	558.044	0.0534469	558.044	0.0626977	558.044	0.0561705	558.044	0.0604924	558.044	0.0562257	558.044	0.0572128	558.044	0.0627129	558.044	0.066276	558.044	0.0657624	558.044	0.0676186
556.995	-0.00922539	556.995	0.050795	556.995	0.0631583	556.995	0.0599156	556.995	0.0753246	556.995	0.0637449	556.995	0.0772342	556.995	0.0345599	556.995	0.043624	556.995	0.0398184	556.995	0.0448386	556.995	0.0370172	556.995	0.0450346	556.995	0.0496033	556.995	0.0761274	556.995	0.0539134	556.995	0.0705338	556.995	0.0567092	556.995	0.0686518	556.995	0.0566945	556.995	0.0639964	556.995	0.0632649	556.995	0.0751255	556.995	0.0664863	556.995	0.0770981
555.947	-0.0091484	555.947	0.0513572	555.947	0.0743264	555.947	0.060622	555.947	0.0888135	555.947	0.0643552	555.947	0.0919655	555.947	0.0348927	555.947	0.0480285	555.947	0.040489	555.947	0.0501679	555.947	0.0377383	555.947	0.0505535	555.947	0.0502951	555.947	0.0867377	555.947	0.0544559	555.947	0.0816113	555.947	0.0574706	555.947	0.0795283	555.947	0.0574322	555.947	0.0737717	555.947	0.0639976	555.947	0.0877515	555.947	0.0673139	555.947	0.090383
555.047	-0.00961695	555.047	0.0518797	555.047	0.0883377	555.047	0.0612428	555.047	0.105688	555.047	0.064866	555.047	0.110276	555.047	0.0348465	555.047	0.0526201	555.047	0.0405758	555.047	0.0562938	555.047	0.0378595	555.047	0.0566885	555.047	0.0507892	555.047	0.100083	555.047	0.054468	555.047	0.0951143	555.047	0.0578667	555.047	0.0933119	555.047	0.0578769	555.047	0.0855063	555.047	0.0646168	555.047	0.103348	555.047	0.0679458	555.047	0.107349
553.998	-0.00922752	553.998	0.052561	553.998	0.102699	553.998	0.0621462	553.998	0.123066	553.998	0.0659335	553.998	0.129916	553.998	0.0354984	553.998	0.0579047	553.998	0.0412037	553.998	0.0628399	553.998	0.0384628	553.998	0.0629344	553.998	0.0516552	553.998	0.113999	553.998	0.0551838	553.998	0.109272	553.998	0.0588221	553.998	0.107465	553.998	0.0586432	553.998	0.0981914	553.998	0.0655733	553.998	0.119949	553.998	0.06865	553.998	0.125189
552.948	-0.00925666	552.948	0.053353	552.948	0.116161	552.948	0.0629125	552.948	0.139812	552.948	0.0667592	552.948	0.148469	552.948	0.0360128	552.948	0.0622884	552.948	0.0418764	552.948	0.0685525	552.948	0.0388849	552.948	0.0686411	552.948	0.0524511	552.948	0.126809	552.948	0.0558245	552.948	0.122796	552.948	0.0595413	552.948	0.120876	552.948	0.0589808	552.948	0.10981	552.948	0.0664979	552.948	0.135626	552.948	0.0696915	552.948	0.141996
552.048	-0.00909045	552.048	0.053971	552.048	0.125607	552.048	0.063824	552.048	0.151301	552.048	0.0679764	552.048	0.161386	552.048	0.0364186	552.048	0.0655553	552.048	0.04252	552.048	0.0725385	552.048	0.0396344	552.048	0.072744	552.048	0.0533604	552.048	0.135894	552.048	0.0563607	552.048	0.131976	552.048	0.0604802	552.048	0.130356	552.048	0.0599415	552.048	0.118061	552.048	0.0674009	552.048	0.146584	552.048	0.0706208	552.048	0.154041
550.998	-0.00877955	550.998	0.0551595	550.998	0.134348	550.998	0.0649553	550.998	0.162488	550.998	0.069323	550.998	0.173091	550.998	0.0369666	550.998	0.0686602	550.998	0.0436024	550.998	0.0761939	550.998	0.040389	550.998	0.0766123	550.998	0.0544937	550.998	0.144032	550.998	0.0574926	550.998	0.140856	550.998	0.0617681	550.998	0.139251	550.998	0.0609706	550.998	0.126435	550.998	0.0688265	550.998	0.157073	550.998	0.071861	550.998	0.165418
549.948	-0.00821231	549.948	0.0564609	549.948	0.137435	549.948	0.0663239	549.948	0.16614	549.948	0.0708645	549.948	0.177583	549.948	0.03803	549.948	0.0697198	549.948	0.044653	549.948	0.0775633	549.948	0.041573	549.948	0.0778225	549.948	0.0559155	549.948	0.147273	549.948	0.0588215	549.948	0.144137	549.948	0.0630626	549.948	0.142231	549.948	0.0625309	549.948	0.129463	549.948	0.0701567	549.948	0.161052	549.948	0.0732995	549.948	0.169662
549.047	-0.0077635	549.047	0.0577974	549.047	0.135097	549.047	0.0676674	549.047	0.16294	549.047	0.0723768	549.047	0.174182	549.047	0.0388848	549.047	0.0690764	549.047	0.0457726	549.047	0.076422	549.047	0.0425155	549.047	0.076601	549.047	0.0572996	549.047	0.144612	549.047	0.0600384	549.047	0.141476	549.047	0.0645397	549.047	0.139953	549.047	0.063782	549.047	0.127919	549.047	0.0717482	549.047	0.158521	549.047	0.0745959	549.047	0.167039
547.996	-0.00735637	547.996	0.058918	547.996	0.127588	547.996	0.0689267	547.996	0.154224	547.996	0.0738649	547.996	0.164595	547.996	0.0398483	547.996	0.0667968	547.996	0.0469667	547.996	0.0730931	547.996	0.0435591	547.996	0.0736547	547.996	0.0586398	547.996	0.138074	547.996	0.061156	547.996	0.134593	547.996	0.0659386	547.996	0.13298	547.996	0.0647812	547.996	0.122548	547.996	0.0730291	547.996	0.151161	547.996	0.0759873	547.996	0.15909
546.945	-0.00699842	546.945	0.0600782	546.945	0.117366	546.945	0.0702926	546.945	0.141004	546.945	0.0751799	546.945	0.150668	546.945	0.0406255	546.945	0.0635049	546.945	0.0479532	546.945	0.0687167	546.945	0.0443914	546.945	0.0694474	546.945	0.0597432	546.945	0.128202	546.945	0.0623005	546.945	0.124437	546.945	0.0671745	546.945	0.122717	546.945	0.0657215	546.945	0.114072	546.945	0.0743836	546.945	0.139959	546.945	0.0771308	546.945	0.147112
546.044	-0.00662724	546.044	0.0611381	546.044	0.106231	546.044	0.0715847	546.044	0.127198	546.044	0.0767214	546.044	0.135534	546.044	0.0413996	546.044	0.0601205	546.044	0.0489262	546.044	0.0641081	546.044	0.0453403	546.044	0.0649543	546.044	0.0610469	546.044	0.117886	546.044	0.0635324	546.044	0.113608	546.044	0.068454	546.044	0.112049	546.044	0.0668373	546.044	0.105327	546.044	0.0757658	546.044	0.127631	546.044	0.0783854	546.044	0.134351
544.992	-0.00592094	544.992	0.0628411	544.992	0.0939979	544.992	0.0733265	544.992	0.111867	544.992	0.078514	544.992	0.118459	544.992	0.0425763	544.992	0.0566492	544.992	0.0504453	544.992	0.0589756	544.992	0.0465615	544.992	0.0600247	544.992	0.0627569	544.992	0.106243	544.992	0.0651198	544.992	0.101912	544.992	0.0703009	544.992	0.100012	544.992	0.0686865	544.992	0.0953661	544.992	0.0774458	544.992	0.113897	544.992	0.0802137	544.992	0.119329
543.94	-0.0054221	543.94	0.0642093	543.94	0.083585	543.94	0.0747992	543.94	0.0990632	543.94	0.0800094	543.94	0.104226	543.94	0.0434283	543.94	0.0536004	543.94	0.0515089	543.94	0.0547875	543.94	0.0476393	543.94	0.0559349	543.94	0.064229	543.94	0.0966167	543.94	0.0664437	543.94	0.0917401	543.94	0.0716914	543.94	0.0901054	543.94	0.0699106	543.94	0.0872139	543.94	0.0787901	543.94	0.102539	543.94	0.0815102	543.94	0.107337
543.039	-0.00448434	543.039	0.0658855	543.039	0.0763295	543.039	0.0766869	543.039	0.0898174	543.039	0.0820584	543.039	0.0943178	543.039	0.0448452	543.039	0.0520221	543.039	0.0530191	543.039	0.052238	543.039	0.0490862	543.039	0.053341	543.039	0.0660393	543.039	0.0899056	543.039	0.0682107	543.039	0.0847842	543.039	0.0735686	543.039	0.0828508	543.039	0.0716478	543.039	0.0814151	543.039	0.0805876	543.039	0.0945673	543.039	0.0831246	543.039	0.0987816
541.986	-0.00415731	541.986	0.0668878	541.986	0.0707163	541.986	0.0778913	541.986	0.0826993	541.986	0.083506	541.986	0.086466	541.986	0.0457052	541.986	0.0505387	541.986	0.0541411	541.986	0.0502483	541.986	0.050169	541.986	0.0512983	541.986	0.0673521	541.986	0.0849725	541.986	0.0695469	541.986	0.0795845	541.986	0.0749221	541.986	0.0776068	541.986	0.0726734	541.986	0.0771151	541.986	0.0820024	541.986	0.0883822	541.986	0.0843913	541.986	0.0923249
540.934	-0.00405818	540.934	0.0677514	540.934	0.0660836	540.934	0.0787558	540.934	0.0772936	540.934	0.0845845	540.934	0.0803063	540.934	0.04613	540.934	0.0490569	540.934	0.0547023	540.934	0.0483157	540.934	0.0506622	540.934	0.0498489	540.934	0.0680811	540.934	0.0808405	540.934	0.070289	540.934	0.0752359	540.934	0.0757188	540.934	0.0730691	540.934	0.0729041	540.934	0.0734985	540.934	0.0828534	540.934	0.0837089	540.934	0.0847911	540.934	0.0870909
540.031	-0.0033744	540.031	0.069012	540.031	0.0642535	540.031	0.0802931	540.031	0.0746358	540.031	0.0859888	540.031	0.077453	540.031	0.0471893	540.031	0.0494081	540.031	0.0558834	540.031	0.0482778	540.031	0.0518688	540.031	0.0497319	540.031	0.0695619	540.031	0.0795422	540.031	0.0718034	540.031	0.073661	540.031	0.0772726	540.031	0.0717724	540.031	0.0743443	540.031	0.0724814	540.031	0.0843078	540.031	0.0815945	540.031	0.0863476	540.031	0.0850416
538.978	-0.00254396	538.978	0.0705259	538.978	0.0628948	538.978	0.0819328	538.978	0.0724493	538.978	0.0876272	538.978	0.0750654	538.978	0.0482643	538.978	0.0499307	538.978	0.0573562	538.978	0.0483355	538.978	0.0531038	538.978	0.0499114	538.978	0.071221	538.978	0.0784311	538.978	0.0733277	538.978	0.072429	538.978	0.0789067	538.978	0.0703234	538.978	0.0761059	538.978	0.0717029	538.978	0.0857866	538.978	0.0801333	538.978	0.0876854	538.978	0.0832548
537.925	-0.0017422	537.925	0.0716727	537.925	0.0619557	537.925	0.0833832	537.925	0.0710518	537.925	0.0890182	537.925	0.0732077	537.925	0.0492431	537.925	0.0505893	537.925	0.0585969	537.925	0.0487971	537.925	0.054183	537.925	0.0502511	537.925	0.0726647	537.925	0.077896	537.925	0.0747036	537.925	0.0716786	537.925	0.0803937	537.925	0.0696979	537.925	0.0775322	537.925	0.0714213	537.925	0.0869728	537.925	0.0789617	537.925	0.0890293	537.925	0.0821829
537.022	-0.00137212	537.022	0.0724603	537.022	0.0611791	537.022	0.0842031	537.022	0.0698217	537.022	0.0899774	537.022	0.071994	537.022	0.0498962	537.022	0.0509502	537.022	0.0594184	537.022	0.0489101	537.022	0.0550516	537.022	0.0506696	537.022	0.0736199	537.022	0.0776853	537.022	0.075652	537.022	0.0712084	537.022	0.0813677	537.022	0.06922	537.022	0.0780995	537.022	0.0709371	537.022	0.0879631	537.022	0.0783037	537.022	0.0897081	537.022	0.0812764
535.968	-0.000721412	535.968	0.0736638	535.968	0.0611843	535.968	0.085482	535.968	0.0697707	535.968	0.0912016	535.968	0.0719651	535.968	0.0509476	535.968	0.0521082	535.968	0.0605862	535.968	0.0499563	535.968	0.0563934	535.968	0.0516743	535.968	0.0749766	535.968	0.078392	535.968	0.0770106	535.968	0.0717335	535.968	0.0827329	535.968	0.0695702	535.968	0.0793525	535.968	0.0717279	535.968	0.0892228	535.968	0.0785622	535.968	0.0910137	535.968	0.0814959
535.064	-8.88833e-05	535.064	0.0746411	535.064	0.0622633	535.064	0.0864524	535.064	0.0704553	535.064	0.0923852	535.064	0.0727935	535.064	0.0519571	535.064	0.0535313	535.064	0.0616372	535.064	0.0510993	535.064	0.0575606	535.064	0.0530091	535.064	0.0763207	535.064	0.0795348	535.064	0.0781393	535.064	0.072903	535.064	0.0838465	535.064	0.0707622	535.064	0.0807772	535.064	0.0728998	535.064	0.0901311	535.064	0.079611	535.064	0.0918986	535.064	0.0827779
534.01	0.000215269	534.01	0.0752032	534.01	0.0634064	534.01	0.0870328	534.01	0.0715303	534.01	0.0930051	534.01	0.0738243	534.01	0.0523317	534.01	0.0545901	534.01	0.0622725	534.01	0.0523612	534.01	0.0580002	534.01	0.0541867	534.01	0.076957	534.01	0.0811137	534.01	0.0789653	534.01	0.0741696	534.01	0.0846094	534.01	0.072099	534.01	0.0814225	534.01	0.0742047	534.01	0.0907513	534.01	0.0808656	534.01	0.0924446	534.01	0.0841002
532.956	0.000340612	532.956	0.0756101	532.956	0.0646847	532.956	0.0874355	532.956	0.0732726	532.956	0.0931875	532.956	0.0758499	532.956	0.0527999	532.956	0.0553499	532.956	0.0626879	532.956	0.0533967	532.956	0.0586137	532.956	0.0552853	532.956	0.077391	532.956	0.0828066	532.956	0.0793906	532.956	0.0758531	532.956	0.0850131	532.956	0.0735164	532.956	0.0813501	532.956	0.0756433	532.956	0.0912463	532.956	0.0827611	532.956	0.092713	532.956	0.0857345
532.051	0.00112018	532.051	0.0766522	532.051	0.0676373	532.051	0.0883786	532.051	0.0763101	532.051	0.0942444	532.051	0.0789822	532.051	0.0537232	532.051	0.0574931	532.051	0.0637848	532.051	0.0555657	532.051	0.0597111	532.051	0.0575314	532.051	0.0784867	532.051	0.0858738	532.051	0.0805556	532.051	0.078747	532.051	0.0862396	532.051	0.0767471	532.051	0.0824229	532.051	0.0785017	532.051	0.0922406	532.051	0.085943	532.051	0.0936958	532.051	0.0890426
530.996	0.00205162	530.996	0.0776392	530.996	0.0716497	530.996	0.0892959	530.996	0.0808305	530.996	0.0950916	530.996	0.0840852	530.996	0.054684	530.996	0.0603152	530.996	0.0651858	530.996	0.0585145	530.996	0.0608379	530.996	0.0605311	530.996	0.0797411	530.996	0.0905065	530.996	0.0817977	530.996	0.0831549	530.996	0.0874474	530.996	0.0810074	530.996	0.0838358	530.996	0.0824017	530.996	0.0931734	530.996	0.0904874	530.996	0.0947855	530.996	0.0940712
529.941	0.00295867	529.941	0.0787349	529.941	0.0758411	529.941	0.0903952	529.941	0.0853007	529.941	0.096347	529.941	0.0889948	529.941	0.0557725	529.941	0.0631959	529.941	0.0665205	529.941	0.0613954	529.941	0.0622267	529.941	0.0635119	529.941	0.0809475	529.941	0.0949406	529.941	0.0831863	529.941	0.0874896	529.941	0.0889038	529.941	0.0854691	529.941	0.0854538	529.941	0.0865096	529.941	0.0940792	529.941	0.0950601	529.941	0.0959683	529.941	0.0988043
529.036	0.00298117	529.036	0.0788257	529.036	0.0784831	529.036	0.0901591	529.036	0.0884622	529.036	0.0963088	529.036	0.0924504	529.036	0.0560542	529.036	0.0643634	529.036	0.0666188	529.036	0.0630001	529.036	0.0624911	529.036	0.0651375	529.036	0.081364	529.036	0.097733	529.036	0.0833488	529.036	0.090253	529.036	0.0888939	529.036	0.0881552	529.036	0.0852032	529.036	0.0887097	529.036	0.0942991	529.036	0.0980988	529.036	0.0959291	529.036	0.102103
527.981	0.00263301	527.981	0.0784209	527.981	0.0799888	527.981	0.0895222	527.981	0.0908806	527.981	0.0955626	527.981	0.0950324	527.981	0.0556847	527.981	0.0650656	527.981	0.0662784	527.981	0.0642108	527.981	0.0625405	527.981	0.0661282	527.981	0.0810885	527.981	0.0998108	527.981	0.083023	527.981	0.0922252	527.981	0.0885716	527.981	0.0901781	527.981	0.0841736	527.981	0.0903137	527.981	0.0936481	527.981	0.100534	527.981	0.0953592	527.981	0.104316
526.925	0.00363191	526.925	0.07938	526.925	0.0846414	526.925	0.0906536	526.925	0.0955778	526.925	0.0967294	526.925	0.100348	526.925	0.0569098	526.925	0.068088	526.925	0.0676169	526.925	0.0670474	526.925	0.063817	526.925	0.069304	526.925	0.0823551	526.925	0.104558	526.925	0.0843046	526.925	0.0968289	526.925	0.0898572	526.925	0.0947088	526.925	0.085841	526.925	0.094533	526.925	0.094859	526.925	0.105128	526.925	0.0965069	526.925	0.109541
526.02	0.00391047	526.02	0.0798107	526.02	0.0879986	526.02	0.0910077	526.02	0.0994018	526.02	0.0968826	526.02	0.104672	526.02	0.0573804	526.02	0.0700786	526.02	0.0684074	526.02	0.0693177	526.02	0.0646353	526.02	0.0715673	526.02	0.0828655	526.02	0.108107	526.02	0.0849153	526.02	0.100306	526.02	0.0904925	526.02	0.0983343	526.02	0.0865132	526.02	0.0976446	526.02	0.0953624	526.02	0.108823	526.02	0.096863	526.02	0.113699
524.963	0.00426571	524.963	0.0800804	524.963	0.0925958	524.963	0.0912999	524.963	0.104565	524.963	0.0971783	524.963	0.110386	524.963	0.0580929	524.963	0.0722523	524.963	0.0690948	524.963	0.0717732	524.963	0.0653959	524.963	0.0741554	524.963	0.0835729	524.963	0.112868	524.963	0.0855921	524.963	0.105077	524.963	0.0912953	524.963	0.1029	524.963	0.086947	524.963	0.101843	524.963	0.0958351	524.963	0.11399	524.963	0.0973339	524.963	0.118939
524.057	0.00470658	524.057	0.0805674	524.057	0.0968552	524.057	0.0917418	524.057	0.109801	524.057	0.0976879	524.057	0.116086	524.057	0.0587322	524.057	0.0744127	524.057	0.0697814	524.057	0.074421	524.057	0.0663445	524.057	0.0766527	524.057	0.0844398	524.057	0.117498	524.057	0.0861869	524.057	0.109654	524.057	0.0920646	524.057	0.107352	524.057	0.0877392	524.057	0.105691	524.057	0.0962935	524.057	0.11894	524.057	0.097958	524.057	0.124229
523	0.00509417	523	0.0809408	523	0.101865	523	0.0920365	523	0.115731	523	0.0979939	523	0.122757	523	0.0594816	523	0.0767918	523	0.0705771	523	0.0770029	523	0.0671017	523	0.0795351	523	0.0851162	523	0.122566	523	0.0868639	523	0.114493	523	0.0926275	523	0.112595	523	0.0884468	523	0.110296	523	0.0965521	523	0.124538	523	0.0984123	523	0.130366
521.943	0.00541867	521.943	0.0815019	521.943	0.106163	521.943	0.0921821	521.943	0.120806	521.943	0.0983028	521.943	0.128071	521.943	0.0600796	521.943	0.079004	521.943	0.0712075	521.943	0.0793753	521.943	0.0679143	521.943	0.0816977	521.943	0.0858884	521.943	0.126987	521.943	0.0875796	521.943	0.118889	521.943	0.093431	521.943	0.117072	521.943	0.0893753	521.943	0.114281	521.943	0.0971723	521.943	0.129362	521.943	0.0988984	521.943	0.135531
521.037	0.00583098	521.037	0.0819927	521.037	0.108423	521.037	0.0925732	521.037	0.123366	521.037	0.0983989	521.037	0.130958	521.037	0.0604309	521.037	0.0801294	521.037	0.0716288	521.037	0.0807607	521.037	0.0685019	521.037	0.0832811	521.037	0.0866629	521.037	0.129287	521.037	0.0880978	521.037	0.121151	521.037	0.0940239	521.037	0.119404	521.037	0.0897394	521.037	0.116484	521.037	0.097584	521.037	0.131832	521.037	0.0994928	521.037	0.138222
519.979	0.00611668	519.979	0.0824869	519.979	0.109322	519.979	0.0928275	519.979	0.124203	519.979	0.0987585	519.979	0.132177	519.979	0.0613007	519.979	0.0812043	519.979	0.0724244	519.979	0.0818122	519.979	0.0695887	519.979	0.0843005	519.979	0.0874108	519.979	0.130571	519.979	0.0888482	519.979	0.122204	519.979	0.0948066	519.979	0.120671	519.979	0.0907113	519.979	0.117503	519.979	0.0979598	519.979	0.132876	519.979	0.0998333	519.979	0.139582
519.073	0.00614201	519.073	0.0826539	519.073	0.108499	519.073	0.0928119	519.073	0.123139	519.073	0.0990583	519.073	0.131071	519.073	0.0615418	519.073	0.0813458	519.073	0.0729469	519.073	0.081847	519.073	0.070053	519.073	0.0843083	519.073	0.0879349	519.073	0.130076	519.073	0.0892504	519.073	0.121697	519.073	0.0953016	519.073	0.119961	519.073	0.0910597	519.073	0.117281	519.073	0.0982283	519.073	0.132294	519.073	0.100225	519.073	0.138962
518.015	0.00623042	518.015	0.0829437	518.015	0.106825	518.015	0.0929068	518.015	0.120934	518.015	0.0993334	518.015	0.128537	518.015	0.0621091	518.015	0.0810523	518.015	0.0733764	518.015	0.081247	518.015	0.070714	518.015	0.0839789	518.015	0.08848	518.015	0.128756	518.015	0.0898443	518.015	0.120117	518.015	0.0958765	518.015	0.118374	518.015	0.091328	518.015	0.115955	518.015	0.0986736	518.015	0.13058	518.015	0.100461	518.015	0.136663
516.956	0.00653152	516.956	0.0835847	516.956	0.104367	516.956	0.0934675	516.956	0.117854	516.956	0.0996891	516.956	0.125366	516.956	0.0629794	516.956	0.080772	516.956	0.0741958	516.956	0.0806808	516.956	0.0716701	516.956	0.0835482	516.956	0.0893573	516.956	0.126839	516.956	0.0905973	516.956	0.118099	516.956	0.0968698	516.956	0.116433	516.956	0.0919044	516.956	0.114308	516.956	0.0991669	516.956	0.127951	516.956	0.101099	516.956	0.13414
516.049	0.00718484	516.049	0.0844088	516.049	0.103033	516.049	0.0940521	516.049	0.116129	516.049	0.100579	516.049	0.123491	516.049	0.0637595	516.049	0.0810691	516.049	0.0751511	516.049	0.0808696	516.049	0.0729	516.049	0.0833842	516.049	0.0905523	516.049	0.125982	516.049	0.0916299	516.049	0.117219	516.049	0.0978064	516.049	0.115329	516.049	0.0931896	516.049	0.113802	516.049	0.0999574	516.049	0.126647	516.049	0.101964	516.049	0.132887
514.99	0.00693479	514.99	0.0845368	514.99	0.100669	514.99	0.0940708	514.99	0.113311	514.99	0.100548	514.99	0.120473	514.99	0.0640093	514.99	0.0804844	514.99	0.075705	514.99	0.0801012	514.99	0.0732315	514.99	0.082825	514.99	0.0909917	514.99	0.124103	514.99	0.0919372	514.99	0.115142	514.99	0.0982763	514.99	0.113261	514.99	0.0935625	514.99	0.112306	514.99	0.10002	514.99	0.124201	514.99	0.102254	514.99	0.130206
513.931	0.0070795	513.931	0.0850987	513.931	0.0991403	513.931	0.0943321	513.931	0.110777	513.931	0.101149	513.931	0.118004	513.931	0.0648246	513.931	0.080359	513.931	0.0764251	513.931	0.0796852	513.931	0.0741397	513.931	0.0824698	513.931	0.0918318	513.931	0.122978	513.931	0.0927776	513.931	0.113367	513.931	0.099133	513.931	0.111831	513.931	0.0942905	513.931	0.110976	513.931	0.100709	513.931	0.122302	513.931	0.102926	513.931	0.128331
513.023	0.00711484	513.023	0.0852966	513.023	0.0974234	513.023	0.0948079	513.023	0.109244	513.023	0.101523	513.023	0.116179	513.023	0.0654739	513.023	0.0803561	513.023	0.0771051	513.023	0.0793955	513.023	0.0749131	513.023	0.0819021	513.023	0.0927386	513.023	0.121917	513.023	0.093669	513.023	0.112194	513.023	0.100001	513.023	0.110721	513.023	0.0951919	513.023	0.109987	513.023	0.101378	513.023	0.120781	513.023	0.103402	513.023	0.126926
511.964	0.00710379	511.964	0.0858212	511.964	0.0960542	511.964	0.0952098	511.964	0.107033	511.964	0.102173	511.964	0.113918	511.964	0.0661661	511.964	0.0801564	511.964	0.0779327	511.964	0.0792435	511.964	0.0758144	511.964	0.0817247	511.964	0.0935892	511.964	0.120854	511.964	0.0943733	511.964	0.110978	511.964	0.100823	511.964	0.109372	511.964	0.0958702	511.964	0.109131	511.964	0.101885	511.964	0.119245	511.964	0.104164	511.964	0.125301
511.056	0.00712305	511.056	0.0863897	511.056	0.0949201	511.056	0.095488	511.056	0.105738	511.056	0.102761	511.056	0.11263	511.056	0.0664236	511.056	0.0801511	511.056	0.0789242	511.056	0.0789816	511.056	0.0765018	511.056	0.0817537	511.056	0.0945468	511.056	0.120013	511.056	0.0951584	511.056	0.110239	511.056	0.101667	511.056	0.108737	511.056	0.0966161	511.056	0.108411	511.056	0.10238	511.056	0.118291	511.056	0.104776	511.056	0.124079
509.996	0.00720871	509.996	0.0868262	509.996	0.0933787	509.996	0.0961508	509.996	0.10401	509.996	0.102969	509.996	0.110705	509.996	0.0672557	509.996	0.0799171	509.996	0.0794375	509.996	0.0786269	509.996	0.0774847	509.996	0.0812746	509.996	0.0955073	509.996	0.119118	509.996	0.0961179	509.996	0.108817	509.996	0.1026	509.996	0.107357	509.996	0.0974004	509.996	0.107476	509.996	0.103237	509.996	0.116976	509.996	0.105561	509.996	0.122915
508.936	0.00688482	508.936	0.087483	508.936	0.0915653	508.936	0.0964386	508.936	0.101676	508.936	0.103493	508.936	0.108494	508.936	0.0678277	508.936	0.0795832	508.936	0.0802906	508.936	0.0782064	508.936	0.078285	508.936	0.0810529	508.936	0.0964379	508.936	0.117708	508.936	0.0970353	508.936	0.107475	508.936	0.103524	508.936	0.105862	508.936	0.0983586	508.936	0.106379	508.936	0.103935	508.936	0.115203	508.936	0.106331	508.936	0.12122
508.027	0.00703449	508.027	0.0881872	508.027	0.0894903	508.027	0.097099	508.027	0.0991954	508.027	0.104306	508.027	0.105678	508.027	0.0688607	508.027	0.0790555	508.027	0.0812739	508.027	0.0777229	508.027	0.0793709	508.027	0.0804628	508.027	0.0976859	508.027	0.115908	508.027	0.0981734	508.027	0.105284	508.027	0.104646	508.027	0.104246	508.027	0.0991671	508.027	0.10502	508.027	0.104871	508.027	0.113048	508.027	0.107207	508.027	0.118796
506.966	0.00689555	506.966	0.0889028	506.966	0.0871857	506.966	0.0978832	506.966	0.0956223	506.966	0.105091	506.966	0.102196	506.966	0.0695888	506.966	0.0787797	506.966	0.0825049	506.966	0.0769324	506.966	0.080244	506.966	0.0796674	506.966	0.0988748	506.966	0.113962	506.966	0.0992373	506.966	0.103301	506.966	0.106001	506.966	0.101703	506.966	0.100534	506.966	0.103015	506.966	0.105791	506.966	0.110297	506.966	0.108174	506.966	0.116301
506.057	0.00671932	506.057	0.0893526	506.057	0.0852982	506.057	0.0986419	506.057	0.0934535	506.057	0.105702	506.057	0.0999269	506.057	0.0703333	506.057	0.0782362	506.057	0.083245	506.057	0.0764244	506.057	0.0811991	506.057	0.0790926	506.057	0.100128	506.057	0.112489	506.057	0.100262	506.057	0.101572	506.057	0.10704	506.057	0.100356	506.057	0.101299	506.057	0.101784	506.057	0.106738	506.057	0.108466	506.057	0.108943	506.057	0.11407
504.996	0.00675536	504.996	0.0902894	504.996	0.0834271	504.996	0.0992084	504.996	0.0912789	504.996	0.106576	504.996	0.0973368	504.996	0.0710312	504.996	0.0777653	504.996	0.0844251	504.996	0.075686	504.996	0.0822852	504.996	0.0786557	504.996	0.101255	504.996	0.111287	504.996	0.101222	504.996	0.100054	504.996	0.108181	504.996	0.0988241	504.996	0.102335	504.996	0.100502	504.996	0.107782	504.996	0.106699	504.996	0.109825	504.996	0.112342
503.935	0.00658447	503.935	0.090978	503.935	0.081713	503.935	0.100022	503.935	0.0889917	503.935	0.107224	503.935	0.095072	503.935	0.0718276	503.935	0.0773475	503.935	0.085184	503.935	0.0752814	503.935	0.0832213	503.935	0.0783881	503.935	0.102503	503.935	0.109757	503.935	0.102341	503.935	0.098406	503.935	0.109429	503.935	0.0971449	503.935	0.103415	503.935	0.0993803	503.935	0.10879	503.935	0.104813	503.935	0.111107	503.935	0.110393
503.025	0.00645414	503.025	0.09183	503.025	0.0801632	503.025	0.100969	503.025	0.0867914	503.025	0.108406	503.025	0.092879	503.025	0.0725406	503.025	0.0771916	503.025	0.0863223	503.025	0.0746679	503.025	0.084274	503.025	0.0779394	503.025	0.103699	503.025	0.108623	503.025	0.10376	503.025	0.0969341	503.025	0.110811	503.025	0.0958666	503.025	0.104582	503.025	0.0982022	503.025	0.109998	503.025	0.103164	503.025	0.112186	503.025	0.108603
501.963	0.00633448	501.963	0.0930422	501.963	0.0782445	501.963	0.102143	501.963	0.0844459	501.963	0.109605	501.963	0.0901588	501.963	0.0739032	501.963	0.0766442	501.963	0.0877957	501.963	0.0743547	501.963	0.0858702	501.963	0.0776517	501.963	0.105897	501.963	0.107115	501.963	0.10533	501.963	0.0953171	501.963	0.112843	501.963	0.0941278	501.963	0.106264	501.963	0.0969595	501.963	0.111701	501.963	0.101183	501.963	0.113725	501.963	0.106839
501.053	0.00610991	501.053	0.0938794	501.053	0.0769964	501.053	0.103068	501.053	0.0828887	501.053	0.110713	501.053	0.0886607	501.053	0.0747403	501.053	0.0765836	501.053	0.0887891	501.053	0.0740926	501.053	0.0870754	501.053	0.0771879	501.053	0.107321	501.053	0.106378	501.053	0.106815	501.053	0.0943746	501.053	0.114264	501.053	0.0932406	501.053	0.107726	501.053	0.0960506	501.053	0.112825	501.053	0.100168	501.053	0.114838	501.053	0.105411
499.991	0.00586979	499.991	0.0950587	499.991	0.0759979	499.991	0.104383	499.991	0.0814515	499.991	0.112075	499.991	0.0874093	499.991	0.0758575	499.991	0.0764953	499.991	0.0904403	499.991	0.0739842	499.991	0.0883241	499.991	0.07744	499.991	0.109226	499.991	0.105649	499.991	0.108361	499.991	0.0935604	499.991	0.116041	499.991	0.0925395	499.991	0.109632	499.991	0.0957484	499.991	0.114412	499.991	0.0989748	499.991	0.116683	499.991	0.104658
498.929	0.00556611	498.929	0.0963163	498.929	0.075422	498.929	0.105484	498.929	0.0806242	498.929	0.113377	498.929	0.0865091	498.929	0.0769972	498.929	0.0765501	498.929	0.0914353	498.929	0.0740546	498.929	0.0894226	498.929	0.0774169	498.929	0.110886	498.929	0.105379	498.929	0.109921	498.929	0.0933004	498.929	0.117592	498.929	0.091964	498.929	0.110909	498.929	0.0952353	498.929	0.116083	498.929	0.0985991	498.929	0.117982	498.929	0.10397
498.018	0.00540276	498.018	0.0973773	498.018	0.0750158	498.018	0.106624	498.018	0.0801752	498.018	0.114301	498.018	0.0862579	498.018	0.0778401	498.018	0.0765599	498.018	0.0926784	498.018	0.0740776	498.018	0.0907371	498.018	0.0774873	498.018	0.112443	498.018	0.105399	498.018	0.111407	498.018	0.0927678	498.018	0.119183	498.018	0.0917896	498.018	0.112368	498.018	0.0951126	498.018	0.117244	498.018	0.0982837	498.018	0.119414	498.018	0.103895
496.955	0.00519672	496.955	0.098813	496.955	0.0747031	496.955	0.10836	496.955	0.0795508	496.955	0.11619	496.955	0.0856271	496.955	0.0795925	496.955	0.0765539	496.955	0.0944121	496.955	0.0740607	496.955	0.09256	496.955	0.077588	496.955	0.114861	496.955	0.105412	496.955	0.113552	496.955	0.0926449	496.955	0.121606	496.955	0.091772	496.955	0.114481	496.955	0.0951354	496.955	0.119589	496.955	0.0980196	496.955	0.121439	496.955	0.103818
496.044	0.00509757	496.044	0.100324	496.044	0.0748415	496.044	0.110023	496.044	0.0795149	496.044	0.117808	496.044	0.0857236	496.044	0.0807487	496.044	0.0767465	496.044	0.0961111	496.044	0.0745123	496.044	0.0941537	496.044	0.0782459	496.044	0.117092	496.044	0.105742	496.044	0.115592	496.044	0.0930109	496.044	0.123788	496.044	0.0921345	496.044	0.116328	496.044	0.095284	496.044	0.121462	496.044	0.0982954	496.044	0.123581	496.044	0.104198
494.981	0.00511232	494.981	0.102235	494.981	0.0750725	494.981	0.112201	494.981	0.0798713	494.981	0.119715	494.981	0.0862233	494.981	0.0826293	494.981	0.0772216	494.981	0.0981359	494.981	0.0751748	494.981	0.0962894	494.981	0.0788585	494.981	0.119714	494.981	0.106288	494.981	0.118027	494.981	0.0936063	494.981	0.126328	494.981	0.0927014	494.981	0.118762	494.981	0.0959594	494.981	0.123826	494.981	0.0988594	494.981	0.12594	494.981	0.104619
494.069	0.0052323	494.069	0.103854	494.069	0.0755241	494.069	0.113828	494.069	0.080074	494.069	0.121477	494.069	0.08656	494.069	0.0842022	494.069	0.077709	494.069	0.0999698	494.069	0.0755422	494.069	0.0978844	494.069	0.0794397	494.069	0.121902	494.069	0.106789	494.069	0.120002	494.069	0.0938473	494.069	0.128453	494.069	0.0931392	494.069	0.12099	494.069	0.0963563	494.069	0.125872	494.069	0.0993635	494.069	0.127856	494.069	0.105224
493.005	0.0052541	493.005	0.105908	493.005	0.0760985	493.005	0.115984	493.005	0.0806684	493.005	0.123828	493.005	0.0871951	493.005	0.0862273	493.005	0.0783878	493.005	0.102337	493.005	0.0763205	493.005	0.100133	493.005	0.080179	493.005	0.124832	493.005	0.107613	493.005	0.12254	493.005	0.0944501	493.005	0.131329	493.005	0.0939109	493.005	0.123883	493.005	0.0970569	493.005	0.128751	493.005	0.0999708	493.005	0.130648	493.005	0.106126
491.941	0.00542349	491.941	0.10846	491.941	0.0766514	491.941	0.118491	491.941	0.081538	491.941	0.12636	491.941	0.0881188	491.941	0.0886812	491.941	0.0789544	491.941	0.104752	491.941	0.0769593	491.941	0.102619	491.941	0.0811626	491.941	0.127991	491.941	0.108658	491.941	0.125781	491.941	0.0955438	491.941	0.134421	491.941	0.0948731	491.941	0.126319	491.941	0.0979251	491.941	0.131694	491.941	0.101057	491.941	0.133643	491.941	0.10716
491.029	0.00508191	491.029	0.109966	491.029	0.0763863	491.029	0.120062	491.029	0.0815013	491.029	0.12809	491.029	0.0880661	491.029	0.0901923	491.029	0.0785547	491.029	0.106252	491.029	0.0767862	491.029	0.104343	491.029	0.0812513	491.029	0.130217	491.029	0.108664	491.029	0.127871	491.029	0.0957575	491.029	0.136469	491.029	0.0950211	491.029	0.128207	491.029	0.0978403	491.029	0.133646	491.029	0.101248	491.029	0.13552	491.029	0.107196
489.965	0.00598724	489.965	0.114005	489.965	0.0785063	489.965	0.124222	489.965	0.0832012	489.965	0.13218	489.965	0.0904192	489.965	0.094071	489.965	0.0806346	489.965	0.110474	489.965	0.0789885	489.965	0.108376	489.965	0.0833649	489.965	0.135216	489.965	0.110986	489.965	0.132604	489.965	0.0977514	489.965	0.141578	489.965	0.0971852	489.965	0.133216	489.965	0.100061	489.965	0.138268	489.965	0.10324	489.965	0.140344	489.965	0.109651
489.053	0.00636258	489.053	0.116939	489.053	0.0794991	489.053	0.127425	489.053	0.0842338	489.053	0.135152	489.053	0.0915279	489.053	0.0966873	489.053	0.0816191	489.053	0.113522	489.053	0.0799709	489.053	0.111478	489.053	0.0843235	489.053	0.13879	489.053	0.112203	489.053	0.135882	489.053	0.0988455	489.053	0.145239	489.053	0.0983691	489.053	0.136785	489.053	0.101156	489.053	0.141847	489.053	0.104476	489.053	0.143719	489.053	0.110998
487.988	0.00645839	487.988	0.119953	487.988	0.0802338	487.988	0.130208	487.988	0.0851381	487.988	0.13812	487.988	0.0924808	487.988	0.0995564	487.988	0.0819828	487.988	0.116377	487.988	0.0803157	487.988	0.114391	487.988	0.0852147	487.988	0.142464	487.988	0.113057	487.988	0.13921	487.988	0.0996783	487.988	0.148728	487.988	0.0993361	487.988	0.139992	487.988	0.101961	487.988	0.145329	487.988	0.105385	487.988	0.147258	487.988	0.111982
487.075	0.00667226	487.075	0.122784	487.075	0.080854	487.075	0.133103	487.075	0.0859136	487.075	0.14107	487.075	0.0936012	487.075	0.102463	487.075	0.0823843	487.075	0.119348	487.075	0.081074	487.075	0.117317	487.075	0.0859911	487.075	0.145879	487.075	0.114028	487.075	0.142419	487.075	0.100519	487.075	0.152195	487.075	0.100236	487.075	0.142785	487.075	0.10271	487.075	0.148825	487.075	0.106266	487.075	0.150457	487.075	0.113134
486.01	0.00747451	486.01	0.127493	486.01	0.0824938	486.01	0.138295	486.01	0.0875208	486.01	0.146102	486.01	0.0952695	486.01	0.107014	486.01	0.0841182	486.01	0.124305	486.01	0.0828703	486.01	0.122249	486.01	0.0876131	486.01	0.151574	486.01	0.115716	486.01	0.147786	486.01	0.102405	486.01	0.157944	486.01	0.10212	486.01	0.148578	486.01	0.104493	486.01	0.154098	486.01	0.108159	486.01	0.15604	486.01	0.115046
484.944	0.00824695	484.944	0.132602	484.944	0.0840385	484.944	0.143417	484.944	0.0888771	484.944	0.151291	484.944	0.0968975	484.944	0.111665	484.944	0.0855319	484.944	0.129374	484.944	0.0843987	484.944	0.127025	484.944	0.0892053	484.944	0.157506	484.944	0.117417	484.944	0.153387	484.944	0.10372	484.944	0.163779	484.944	0.103776	484.944	0.154669	484.944	0.106064	484.944	0.159713	484.944	0.109795	484.944	0.161535	484.944	0.116804
484.031	0.00825595	484.031	0.135643	484.031	0.0841185	484.031	0.146316	484.031	0.0893956	484.031	0.154231	484.031	0.0974687	484.031	0.114888	484.031	0.085346	484.031	0.132106	484.031	0.0844464	484.031	0.130022	484.031	0.0897098	484.031	0.161026	484.031	0.117894	484.031	0.156628	484.031	0.104403	484.031	0.167127	484.031	0.104257	484.031	0.157367	484.031	0.106236	484.031	0.163425	484.031	0.11027	484.031	0.164845	484.031	0.117547
482.965	0.00893272	482.965	0.141869	482.965	0.0856259	482.965	0.152351	482.965	0.0910142	482.965	0.160233	482.965	0.0992235	482.965	0.120816	482.965	0.0864031	482.965	0.137985	482.965	0.0856917	482.965	0.136037	482.965	0.0913367	482.965	0.167614	482.965	0.119403	482.965	0.163036	482.965	0.105941	482.965	0.173726	482.965	0.10598	482.965	0.163613	482.965	0.107847	482.965	0.170039	482.965	0.112049	482.965	0.171516	482.965	0.119353
482.051	0.00915313	482.051	0.146152	482.051	0.0863847	482.051	0.156699	482.051	0.0917275	482.051	0.164704	482.051	0.0999828	482.051	0.124638	482.051	0.0870886	482.051	0.142227	482.051	0.0862721	482.051	0.139988	482.051	0.0920756	482.051	0.172573	482.051	0.120179	482.051	0.16752	482.051	0.106796	482.051	0.178532	482.051	0.106703	482.051	0.168388	482.051	0.108719	482.051	0.174517	482.051	0.112782	482.051	0.176219	482.051	0.120327
480.985	0.0100005	480.985	0.152877	480.985	0.0878314	480.985	0.163448	480.985	0.0931799	480.985	0.171484	480.985	0.101821	480.985	0.131029	480.985	0.0884603	480.985	0.148895	480.985	0.0879665	480.985	0.14648	480.985	0.0935788	480.985	0.179922	480.985	0.121826	480.985	0.174488	480.985	0.108349	480.985	0.185761	480.985	0.10841	480.985	0.175515	480.985	0.110119	480.985	0.181815	480.985	0.11446	480.985	0.183081	480.985	0.122229
480.071	0.0108416	480.071	0.160011	480.071	0.0890438	480.071	0.170629	480.071	0.0945067	480.071	0.17862	480.071	0.103253	480.071	0.138057	480.071	0.0897657	480.071	0.155893	480.071	0.0892819	480.071	0.153545	480.071	0.0951113	480.071	0.187661	480.071	0.123265	480.071	0.181463	480.071	0.109912	480.071	0.193615	480.071	0.109974	480.071	0.183394	480.071	0.111584	480.071	0.189387	480.071	0.116132	480.071	0.190683	480.071	0.123729
479.004	0.0115221	479.004	0.168036	479.004	0.0903405	479.004	0.178441	479.004	0.0955533	479.004	0.186485	479.004	0.104652	479.004	0.14564	479.004	0.0909113	479.004	0.163736	479.004	0.0904504	479.004	0.161204	479.004	0.0963863	479.004	0.196197	479.004	0.124464	479.004	0.189602	479.004	0.111257	479.004	0.201846	479.004	0.111526	479.004	0.192127	479.004	0.112906	479.004	0.198068	479.004	0.117345	479.004	0.199073	479.004	0.125505
477.937	0.0121141	477.937	0.17826	477.937	0.0915088	477.937	0.188326	477.937	0.0969397	477.937	0.196367	477.937	0.105982	477.937	0.155604	477.937	0.0919537	477.937	0.173734	477.937	0.0918727	477.937	0.170909	477.937	0.0977637	477.937	0.206973	477.937	0.125952	477.937	0.199452	477.937	0.112588	477.937	0.212625	477.937	0.112931	477.937	0.202907	477.937	0.114302	477.937	0.20863	477.937	0.119052	477.937	0.209253	477.937	0.127065
477.023	0.0126482	477.023	0.18648	477.023	0.0923239	477.023	0.196503	477.023	0.098045	477.023	0.204279	477.023	0.107123	477.023	0.1635	477.023	0.0927423	477.023	0.181832	477.023	0.0927156	477.023	0.17861	477.023	0.0988211	477.023	0.215777	477.023	0.126985	477.023	0.20754	477.023	0.113572	477.023	0.221005	477.023	0.113992	477.023	0.211117	477.023	0.115385	477.023	0.217331	477.023	0.120165	477.023	0.217694	477.023	0.128367
475.955	0.0130267	475.955	0.197477	475.955	0.0935385	475.955	0.20687	475.955	0.0990696	475.955	0.214982	475.955	0.108371	475.955	0.174318	475.955	0.0936301	475.955	0.19225	475.955	0.0938247	475.955	0.189126	475.955	0.100068	475.955	0.227179	475.955	0.127866	475.955	0.217927	475.955	0.114746	475.955	0.232286	475.955	0.115191	475.955	0.222868	475.955	0.116382	475.955	0.228369	475.955	0.121322	475.955	0.228832	475.955	0.129822
475.04	0.0136128	475.04	0.208231	475.04	0.0942911	475.04	0.217917	475.04	0.0999624	475.04	0.225763	475.04	0.109494	475.04	0.185102	475.04	0.0944369	475.04	0.20313	475.04	0.094827	475.04	0.199733	475.04	0.10126	475.04	0.238777	475.04	0.128985	475.04	0.228882	475.04	0.115645	475.04	0.243346	475.04	0.116316	475.04	0.234494	475.04	0.117342	475.04	0.240086	475.04	0.1225	475.04	0.239867	475.04	0.131097
473.972	0.0141887	473.972	0.224566	473.972	0.0950922	473.972	0.233241	473.972	0.10085	473.972	0.241487	473.972	0.110745	473.972	0.200866	473.972	0.0954949	473.972	0.218558	473.972	0.0958793	473.972	0.214763	473.972	0.102464	473.972	0.255285	473.972	0.129982	473.972	0.243424	473.972	0.116841	473.972	0.259012	473.972	0.117432	473.972	0.250734	473.972	0.118418	473.972	0.25622	473.972	0.12376	473.972	0.255932	473.972	0.132547
473.057	0.0147146	473.057	0.241062	473.057	0.0958697	473.057	0.249125	473.057	0.101637	473.057	0.257145	473.057	0.1114	473.057	0.216906	473.057	0.0961718	473.057	0.234418	473.057	0.0967984	473.057	0.230602	473.057	0.103398	473.057	0.271691	473.057	0.130899	473.057	0.259097	473.057	0.117697	473.057	0.275468	473.057	0.118411	473.057	0.267963	473.057	0.119388	473.057	0.273323	473.057	0.124772	473.057	0.271678	473.057	0.133673
471.989	0.0151968	471.989	0.260454	471.989	0.0965998	471.989	0.268091	471.989	0.10227	471.989	0.275929	471.989	0.112183	471.989	0.236289	471.989	0.0971169	471.989	0.253395	471.989	0.0976844	471.989	0.249005	471.989	0.104438	471.989	0.291727	471.989	0.131643	471.989	0.27699	471.989	0.118636	471.989	0.294453	471.989	0.119361	471.989	0.288391	471.989	0.120322	471.989	0.292994	471.989	0.125916	471.989	0.291175	471.989	0.13479
471.073	0.0155747	471.073	0.2759	471.073	0.0969519	471.073	0.283137	471.073	0.102553	471.073	0.290859	471.073	0.112765	471.073	0.251851	471.073	0.0974868	471.073	0.268225	471.073	0.0982489	471.073	0.263829	471.073	0.105094	471.073	0.307959	471.073	0.132148	471.073	0.291277	471.073	0.119108	471.073	0.309574	471.073	0.120052	471.073	0.304221	471.073	0.120949	471.073	0.308826	471.073	0.126546	471.073	0.305884	471.073	0.135594
470.005	0.0158235	470.005	0.299085	470.005	0.0974545	470.005	0.305131	470.005	0.10319	470.005	0.312358	470.005	0.113384	470.005	0.274205	470.005	0.0982162	470.005	0.290416	470.005	0.0990574	470.005	0.284945	470.005	0.106003	470.005	0.33089	470.005	0.132706	470.005	0.311496	470.005	0.119837	470.005	0.33126	470.005	0.120817	470.005	0.327375	470.005	0.12161	470.005	0.331233	470.005	0.127291	470.005	0.327799	470.005	0.136626
468.936	0.0164175	468.936	0.328814	468.936	0.0980887	468.936	0.33366	468.936	0.1037	468.936	0.340523	468.936	0.114181	468.936	0.304375	468.936	0.0991188	468.936	0.319403	468.936	0.0999117	468.936	0.313758	468.936	0.107021	468.936	0.361683	468.936	0.133341	468.936	0.339012	468.936	0.120464	468.936	0.359914	468.936	0.121731	468.936	0.358077	468.936	0.122457	468.936	0.361053	468.936	0.128098	468.936	0.357023	468.936	0.137859
468.019	0.0168316	468.019	0.362828	468.019	0.0983246	468.019	0.366029	468.019	0.10413	468.019	0.372735	468.019	0.114626	468.019	0.337879	468.019	0.0996731	468.019	0.35169	468.019	0.100547	468.019	0.345178	468.019	0.107901	468.019	0.394752	468.019	0.133643	468.019	0.369078	468.019	0.121175	468.019	0.392483	468.019	0.122066	468.019	0.392837	468.019	0.122941	468.019	0.395168	468.019	0.128876	468.019	0.389203	468.019	0.138487
466.95	0.0170933	466.95	0.397626	466.95	0.098373	466.95	0.39988	466.95	0.104131	466.95	0.405669	466.95	0.114788	466.95	0.373253	466.95	0.100305	466.95	0.385909	466.95	0.101067	466.95	0.378254	466.95	0.108295	466.95	0.430514	466.95	0.13407	466.95	0.400529	466.95	0.121444	466.95	0.425793	466.95	0.122659	466.95	0.428696	466.95	0.123304	466.95	0.42997	466.95	0.129414	466.95	0.422993	466.95	0.139131
466.034	0.0174484	466.034	0.431165	466.034	0.0986155	466.034	0.431685	466.034	0.104255	466.034	0.437153	466.034	0.115096	466.034	0.407242	466.034	0.100748	466.034	0.418162	466.034	0.101539	466.034	0.409636	466.034	0.109157	466.034	0.464695	466.034	0.134277	466.034	0.430676	466.034	0.121812	466.034	0.457459	466.034	0.123068	466.034	0.463632	466.034	0.123918	466.034	0.463844	466.034	0.129625	466.034	0.455355	466.034	0.139738
464.964	0.0177498	464.964	0.471621	464.964	0.0987425	464.964	0.470086	464.964	0.104606	464.964	0.475688	464.964	0.115322	464.964	0.447622	464.964	0.101386	464.964	0.457024	464.964	0.102055	464.964	0.447693	464.964	0.109773	464.964	0.504208	464.964	0.134563	464.964	0.465702	464.964	0.122312	464.964	0.495529	464.964	0.123465	464.964	0.503857	464.964	0.124259	464.964	0.502951	464.964	0.130338	464.964	0.492973	464.964	0.140286
464.047	0.0180208	464.047	0.518481	464.047	0.099168	464.047	0.514393	464.047	0.104936	464.047	0.519742	464.047	0.115935	464.047	0.49463	464.047	0.102078	464.047	0.502459	464.047	0.102727	464.047	0.491968	464.047	0.110437	464.047	0.551796	464.047	0.134941	464.047	0.507126	464.047	0.122875	464.047	0.539419	464.047	0.124106	464.047	0.55179	464.047	0.124731	464.047	0.54887	464.047	0.1309	464.047	0.536939	464.047	0.141137
462.977	0.0184494	462.977	0.589891	462.977	0.0999411	462.977	0.582182	462.977	0.105508	462.977	0.586314	462.977	0.116632	462.977	0.566336	462.977	0.102963	462.977	0.570839	462.977	0.103537	462.977	0.558614	462.977	0.11128	462.977	0.622305	462.977	0.135743	462.977	0.570042	462.977	0.123707	462.977	0.606243	462.977	0.124985	462.977	0.625388	462.977	0.125571	462.977	0.620316	462.977	0.131794	462.977	0.603443	462.977	0.142377
462.06	0.0187216	462.06	0.647435	462.06	0.100101	462.06	0.636219	462.06	0.106184	462.06	0.638506	462.06	0.117379	462.06	0.624265	462.06	0.103544	462.06	0.627346	462.06	0.104172	462.06	0.612753	462.06	0.112043	462.06	0.680132	462.06	0.136196	462.06	0.620597	462.06	0.124239	462.06	0.659994	462.06	0.125603	462.06	0.683549	462.06	0.126094	462.06	0.674361	462.06	0.132384	462.06	0.659013	462.06	0.143217
460.989	0.0193283	460.989	0.726253	460.989	0.101232	460.989	0.711776	460.989	0.107236	460.989	0.714001	460.989	0.118525	460.989	0.704418	460.989	0.104784	460.989	0.702938	460.989	0.105371	460.989	0.686857	460.989	0.113657	460.989	0.75914	460.989	0.137188	460.989	0.690483	460.989	0.125449	460.989	0.733323	460.989	0.127084	460.989	0.764293	460.989	0.127552	460.989	0.753778	460.989	0.133971	460.989	0.732914	460.989	0.144916
460.072	0.0193288	460.072	0.776298	460.072	0.10126	460.072	0.759358	460.072	0.107485	460.072	0.759929	460.072	0.11893	460.072	0.75434	460.072	0.105064	460.072	0.750784	460.072	0.1055	460.072	0.732855	460.072	0.113954	460.072	0.808363	460.072	0.137382	460.072	0.734372	460.072	0.125817	460.072	0.778684	460.072	0.127321	460.072	0.814847	460.072	0.127647	460.072	0.801207	460.072	0.134301	460.072	0.778265	460.072	0.145329
459.001	0.0191236	459.001	0.862755	459.001	0.101061	459.001	0.842962	459.001	0.107707	459.001	0.841359	459.001	0.119129	459.001	0.841766	459.001	0.105266	459.001	0.834998	459.001	0.105644	459.001	0.813706	459.001	0.11402	459.001	0.893624	459.001	0.137599	459.001	0.810684	459.001	0.125916	459.001	0.860336	459.001	0.127496	459.001	0.901177	459.001	0.127757	459.001	0.885843	459.001	0.134504	459.001	0.859502	459.001	0.145791
457.93	0.0196549	457.93	0.987326	457.93	0.10221	457.93	0.959523	457.93	0.10888	457.93	0.954702	457.93	0.120693	457.93	0.964497	457.93	0.106441	457.93	0.952291	457.93	0.106882	457.93	0.931561	457.93	0.115378	457.93	1.01636	457.93	0.138657	457.93	0.915614	457.93	0.127527	457.93	0.973229	457.93	0.128995	457.93	1.02792	457.93	0.129102	457.93	1.0059	457.93	0.13629	457.93	0.976132	457.93	0.147728
457.011	0.0198393	457.011	1.08971	457.011	0.103116	457.011	1.05939	457.011	0.109868	457.011	1.05371	457.011	0.121772	457.011	1.07212	457.011	0.107081	457.011	1.05295	457.011	0.107821	457.011	1.0287	457.011	0.116436	457.011	1.12346	457.011	0.139431	457.011	1.00833	457.011	0.128546	457.011	1.07069	457.011	0.130192	457.011	1.13697	457.011	0.130214	457.011	1.10843	457.011	0.137477	457.011	1.07452	457.011	0.149106
455.94	0.0201843	455.94	1.22351	455.94	0.10401	455.94	1.17746	455.94	0.111	455.94	1.17066	455.94	0.123259	455.94	1.19982	455.94	0.107941	455.94	1.17845	455.94	0.108679	455.94	1.14971	455.94	0.117399	455.94	1.2489	455.94	0.140423	455.94	1.12108	455.94	0.129626	455.94	1.19096	455.94	0.131486	455.94	1.26654	455.94	0.131251	455.94	1.23327	455.94	0.138871	455.94	1.19452	455.94	0.150806
455.021	0.0204298	455.021	1.32283	455.021	0.104886	455.021	1.27797	455.021	0.112083	455.021	1.26714	455.021	0.124123	455.021	1.30557	455.021	0.108432	455.021	1.27364	455.021	0.109374	455.021	1.24962	455.021	0.11824	455.021	1.3514	455.021	0.141329	455.021	1.2094	455.021	0.130724	455.021	1.28193	455.021	0.132496	455.021	1.36413	455.021	0.13218	455.021	1.33187	455.021	0.139937	455.021	1.29009	455.021	0.152026
453.95	0.0205968	453.95	1.47642	453.95	0.106069	453.95	1.42597	453.95	0.113489	453.95	1.416	453.95	0.125908	453.95	1.46447	453.95	0.109333	453.95	1.4291	453.95	0.110502	453.95	1.39057	453.95	0.119332	453.95	1.50492	453.95	0.142438	453.95	1.34711	453.95	0.132075	453.95	1.42794	453.95	0.133902	453.95	1.52474	453.95	0.133418	453.95	1.4882	453.95	0.141792	453.95	1.43374	453.95	0.154136
453.031	0.0207455	453.031	1.63402	453.031	0.107064	453.031	1.56935	453.031	0.114805	453.031	1.557	453.031	0.127688	453.031	1.61849	453.031	0.11002	453.031	1.56981	453.031	0.111441	453.031	1.53894	453.031	0.120352	453.031	1.66152	453.031	0.143524	453.031	1.47875	453.031	0.133554	453.031	1.57148	453.031	0.135284	453.031	1.68042	453.031	0.134677	453.031	1.63468	453.031	0.14321	453.031	1.57721	453.031	0.155893
451.958	0.0208773	451.958	1.81776	451.958	0.108433	451.958	1.74397	451.958	0.116468	451.958	1.72844	451.958	0.129625	451.958	1.80425	451.958	0.111009	451.958	1.75502	451.958	0.112605	451.958	1.7069	451.958	0.121895	451.958	1.83191	451.958	0.14511	451.958	1.63758	451.958	0.135073	451.958	1.73861	451.958	0.137156	451.958	1.86595	451.958	0.136225	451.958	1.81407	451.958	0.14529	451.958	1.74746	451.958	0.158121
451.039	0.0211278	451.039	1.98495	451.039	0.11007	451.039	1.90924	451.039	0.118562	451.039	1.88983	451.039	0.131714	451.039	1.97928	451.039	0.111806	451.039	1.90762	451.039	0.11395	451.039	1.86507	451.039	0.122945	451.039	2.00835	451.039	0.146576	451.039	1.78024	451.039	0.137006	451.039	1.89396	451.039	0.139052	451.039	2.04489	451.039	0.137832	451.039	1.96712	451.039	0.147353	451.039	1.89541	451.039	0.160454
449.966	0.0212171	449.966	2.17665	449.966	0.111649	449.966	2.1139	449.966	0.120936	449.966	2.08482	449.966	0.134344	449.966	2.18025	449.966	0.112888	449.966	2.11831	449.966	0.115318	449.966	2.05319	449.966	0.12455	449.966	2.19863	449.966	0.148506	449.966	1.96181	449.966	0.13907	449.966	2.09129	449.966	0.141264	449.966	2.25789	449.966	0.139677	449.966	2.17826	449.966	0.149901	449.966	2.09706	449.966	0.163299
449.047	0.0219024	449.047	2.37494	449.047	0.114085	449.047	2.28548	449.047	0.123583	449.047	2.25742	449.047	0.137446	449.047	2.39046	449.047	0.114262	449.047	2.30148	449.047	0.11726	449.047	2.25497	449.047	0.126529	449.047	2.42227	449.047	0.150916	449.047	2.12523	449.047	0.14169	449.047	2.26485	449.047	0.143794	449.047	2.44239	449.047	0.14197	449.047	2.37896	449.047	0.152695	449.047	2.26705	449.047	0.166288
447.974	0.021905	447.974	2.63143	447.974	0.116686	447.974	2.54617	447.974	0.126657	447.974	2.52266	447.974	0.140973	447.974	2.62384	447.974	0.115559	447.974	2.5486	447.974	0.119208	447.974	2.48288	447.974	0.128352	447.974	2.63908	447.974	0.153404	447.974	2.34762	447.974	0.144557	447.974	2.52056	447.974	0.146713	447.974	2.75551	447.974	0.144406	447.974	2.62673	447.974	0.156048	447.974	2.51515	447.974	0.170124
447.054	0.022121	447.054	2.89469	447.054	0.119144	447.054	2.78427	447.054	0.129866	447.054	2.69618	447.054	0.144647	447.054	2.89665	447.054	0.116918	447.054	2.81785	447.054	0.121075	447.054	2.71371	447.054	0.130341	447.054	3.00769	447.054	0.155979	447.054	2.58272	447.054	0.147463	447.054	2.74869	447.054	0.149763	447.054	2.98849	447.054	0.147085	447.054	2.86169	447.054	0.159358	447.054	2.77472	447.054	0.173904
445.98	0.0220893	445.98	3.15315	445.98	0.122211	445.98	3.06156	445.98	0.133464	445.98	3.08402	445.98	0.14868	445.98	3.09526	445.98	0.118333	445.98	3.11067	445.98	0.122984	445.98	3.03658	445.98	0.132386	445.98	3.18195	445.98	0.159161	445.98	2.81737	445.98	0.150839	445.98	3.13961	445.98	0.153035	445.98	3.28876	445.98	0.149924	445.98	3.24864	445.98	0.163161	445.98	2.99295	445.98	0.178081
445.06	0.0219232	445.06	3.17658	445.06	0.12432	445.06	3.25005	445.06	0.136567	445.06	3.1512	445.06	0.152389	445.06	3.45379	445.06	0.119128	445.06	3.20339	445.06	0.124723	445.06	3.09412	445.06	0.133909	445.06	3.34401	445.06	0.161545	445.06	2.97013	445.06	0.153515	445.06	3.16254	445.06	0.155737	445.06	3.46419	445.06	0.152397	445.06	3.40285	445.06	0.166464	445.06	3.25751	445.06	0.181344
443.986	0.0220288	443.986	3.91062	443.986	0.128398	443.986	3.67137	443.986	0.14145	443.986	3.68079	443.986	0.157726	443.986	3.36949	443.986	0.121074	443.986	3.33948	443.986	0.127413	443.986	3.56431	443.986	0.136631	443.986	3.61108	443.986	0.165428	443.986	3.27132	443.986	0.157718	443.986	3.36006	443.986	0.160231	443.986	3.48021	443.986	0.156081	443.986	3.45295	443.986	0.171262	443.986	3.35247	443.986	0.187046
443.066	0.0221305	443.066	4.06968	443.066	0.13192	443.066	3.72831	443.066	0.145657	443.066	3.37949	443.066	0.162427	443.066	3.74399	443.066	0.122621	443.066	3.78583	443.066	0.129773	443.066	3.85798	443.066	0.138908	443.066	3.6895	443.066	0.169006	443.066	3.54393	443.066	0.161649	443.066	3.91185	443.066	0.163812	443.066	3.54935	443.066	0.15943	443.066	4.0866	443.066	0.175583	443.066	3.69609	443.066	0.191623
441.992	0.0226584	441.992	3.72013	441.992	0.137511	441.992	10	441.992	0.152637	441.992	10	441.992	0.169978	441.992	10	441.992	0.12555	441.992	10	441.992	0.133986	441.992	10	441.992	0.142953	441.992	10	441.992	0.174797	441.992	10	441.992	0.167842	441.992	10	441.992	0.170287	441.992	10	441.992	0.165026	441.992	4.57957	441.992	0.182758	441.992	10	441.992	0.199357
441.071	0.0221647	441.071	3.62563	441.071	0.141232	441.071	4.0216	441.071	0.157279	441.071	4.02398	441.071	0.17528	441.071	4.07727	441.071	0.126873	441.071	10	441.071	0.136182	441.071	3.97566	441.071	0.145188	441.071	5.18563	441.071	0.178624	441.071	10	441.071	0.172109	441.071	10	441.071	0.174204	441.071	3.94265	441.071	0.168569	441.071	4.14072	441.071	0.187369	441.071	3.74618	441.071	0.204412
439.996	0.0223171	439.996	10	439.996	0.146958	439.996	4.97277	439.996	0.164405	439.996	3.94585	439.996	0.183149	439.996	3.96613	439.996	0.129785	439.996	4.00585	439.996	0.140155	439.996	3.92775	439.996	0.148941	439.996	4.9717	439.996	0.184483	439.996	10	439.996	0.178292	439.996	10	439.996	0.180684	439.996	4.21881	439.996	0.173805	439.996	10	439.996	0.194454	439.996	10	439.996	0.212329
439.075	0.0223995	439.075	4.07065	439.075	0.152858	439.075	3.63963	439.075	0.171649	439.075	4.42652	439.075	0.190913	439.075	4.65605	439.075	0.132469	439.075	4.65932	439.075	0.14412	439.075	3.83204	439.075	0.152983	439.075	10	439.075	0.190539	439.075	4.16492	439.075	0.184586	439.075	10	439.075	0.187033	439.075	3.67041	439.075	0.179482	439.075	10	439.075	0.201667	439.075	10	439.075	0.220059
438	0.0225725	438	10	438	0.159895	438	10	438	0.180167	438	4.135	438	0.200246	438	3.51819	438	0.135674	438	4.16303	438	0.148877	438	10	438	0.1574	438	4.07774	438	0.197729	438	10	438	0.192039	438	10	438	0.194663	438	10	438	0.186469	438	10	438	0.210383	438	10	438	0.229202
436.925	0.0226195	436.925	10	436.925	0.167521	436.925	3.74823	436.925	0.189116	436.925	10	436.925	0.210443	436.925	4.72015	436.925	0.13931	436.925	10	436.925	0.154036	436.925	4.10233	436.925	0.162524	436.925	4.40282	436.925	0.205813	436.925	4.43724	436.925	0.200234	436.925	10	436.925	0.202879	436.925	10	436.925	0.193352	436.925	3.84914	436.925	0.219364	436.925	10	436.925	0.238756
436.003	0.0226061	436.003	3.99165	436.003	0.175661	436.003	3.86436	436.003	0.198937	436.003	10	436.003	0.220996	436.003	3.79965	436.003	0.143181	436.003	3.86219	436.003	0.159401	436.003	10	436.003	0.167284	436.003	3.74088	436.003	0.214134	436.003	10	436.003	0.209082	436.003	10	436.003	0.211424	436.003	10	436.003	0.200876	436.003	10	436.003	0.22877	436.003	4.14622	436.003	0.248996
434.927	0.0223951	434.927	3.71426	434.927	0.184749	434.927	3.90019	434.927	0.210209	434.927	10	434.927	0.233781	434.927	5.11301	434.927	0.147584	434.927	3.81258	434.927	0.165533	434.927	4.09603	434.927	0.173122	434.927	10	434.927	0.223624	434.927	10	434.927	0.219294	434.927	10	434.927	0.221414	434.927	3.9209	434.927	0.209648	434.927	10	434.927	0.240251	434.927	10	434.927	0.260871
434.005	0.0224208	434.005	10	434.005	0.195423	434.005	10	434.005	0.22289	434.005	3.65241	434.005	0.247112	434.005	4.30671	434.005	0.152361	434.005	10	434.005	0.17238	434.005	4.07826	434.005	0.179639	434.005	3.57475	434.005	0.234152	434.005	10	434.005	0.230295	434.005	10	434.005	0.232085	434.005	10	434.005	0.219169	434.005	3.92797	434.005	0.252122	434.005	10	434.005	0.273593
432.929	0.0224596	432.929	4.1588	432.929	0.20657	432.929	10	432.929	0.235819	432.929	4.11634	432.929	0.261312	432.929	4.15126	432.929	0.157339	432.929	3.61677	432.929	0.179615	432.929	4.46885	432.929	0.186413	432.929	10	432.929	0.245619	432.929	3.97659	432.929	0.241316	432.929	4.20072	432.929	0.24348	432.929	3.97346	432.929	0.228749	432.929	10	432.929	0.264528	432.929	3.74308	432.929	0.286793
432.007	0.0224359	432.007	10	432.007	0.21685	432.007	10	432.007	0.247714	432.007	10	432.007	0.27458	432.007	3.56886	432.007	0.162078	432.007	3.89039	432.007	0.186431	432.007	10	432.007	0.192743	432.007	10	432.007	0.256242	432.007	10	432.007	0.252466	432.007	10	432.007	0.254187	432.007	10	432.007	0.238033	432.007	5.40685	432.007	0.276313	432.007	4.00709	432.007	0.298741
430.931	0.0222581	430.931	4.30229	430.931	0.232291	430.931	3.67176	430.931	0.266042	430.931	4.19139	430.931	0.293801	430.931	10	430.931	0.169479	430.931	3.91929	430.931	0.196194	430.931	3.75327	430.931	0.202057	430.931	10	430.931	0.272101	430.931	3.95435	430.931	0.267496	430.931	10	430.931	0.269388	430.931	3.77923	430.931	0.251596	430.931	10	430.931	0.293203	430.931	10	430.931	0.316171
430.008	0.0223167	430.008	4.26462	430.008	0.248105	430.008	10	430.008	0.284841	430.008	3.95217	430.008	0.313741	430.008	3.74147	430.008	0.176708	430.008	10	430.008	0.206074	430.008	10	430.008	0.210856	430.008	4.46777	430.008	0.287845	430.008	10	430.008	0.284133	430.008	3.87833	430.008	0.285197	430.008	10	430.008	0.264759	430.008	4.32355	430.008	0.310535	430.008	3.89052	430.008	0.334274
428.931	0.022015	428.931	10	428.931	0.269631	428.931	3.95664	428.931	0.309448	428.931	10	428.931	0.341068	428.931	4.05745	428.931	0.186759	428.931	10	428.931	0.21951	428.931	10	428.931	0.22385	428.931	4.37999	428.931	0.309426	428.931	4.01913	428.931	0.305211	428.931	4.20854	428.931	0.30697	428.931	4.53068	428.931	0.283792	428.931	10	428.931	0.334422	428.931	10	428.931	0.358334
428.008	0.02251	428.008	10	428.008	0.2878	428.008	10	428.008	0.33139	428.008	10	428.008	0.363988	428.008	10	428.008	0.195482	428.008	10	428.008	0.230737	428.008	10	428.008	0.23442	428.008	10	428.008	0.3288	428.008	10	428.008	0.324258	428.008	10	428.008	0.325507	428.008	10	428.008	0.299394	428.008	10	428.008	0.354116	428.008	10	428.008	0.378835
426.931	0.0223058	426.931	10	426.931	0.31147	426.931	10	426.931	0.359227	426.931	10	426.931	0.393339	426.931	10	426.931	0.206045	426.931	10	426.931	0.244857	426.931	10	426.931	0.247643	426.931	10	426.931	0.351981	426.931	10	426.931	0.347869	426.931	10	426.931	0.348468	426.931	10	426.931	0.319159	426.931	10	426.931	0.379624	426.931	10	426.931	0.404598
426.008	0.0221766	426.008	10	426.008	0.334656	426.008	10	426.008	0.386097	426.008	10	426.008	0.422447	426.008	10	426.008	0.216287	426.008	10	426.008	0.258576	426.008	10	426.008	0.260489	426.008	10	426.008	0.375859	426.008	10	426.008	0.37064	426.008	10	426.008	0.371914	426.008	10	426.008	0.338713	426.008	10	426.008	0.404638	426.008	10	426.008	0.430909
424.93	0.0219712	424.93	10	424.93	0.369009	424.93	10	424.93	0.42616	424.93	10	424.93	0.466163	424.93	10	424.93	0.231407	424.93	10	424.93	0.277811	424.93	10	424.93	0.278772	424.93	10	424.93	0.410068	424.93	10	424.93	0.405107	424.93	10	424.93	0.405	424.93	10	424.93	0.36702	424.93	10	424.93	0.440952	424.93	10	424.93	0.469067
424.006	0.0217834	424.006	10	424.006	0.401872	424.006	10	424.006	0.465555	424.006	10	424.006	0.50845	424.006	10	424.006	0.245508	424.006	10	424.006	0.295973	424.006	10	424.006	0.29637	424.006	10	424.006	0.443197	424.006	10	424.006	0.438235	424.006	10	424.006	0.438428	424.006	10	424.006	0.396051	424.006	10	424.006	0.476387	424.006	10	424.006	0.505516
422.929	0.0216253	422.929	10	422.929	0.443116	422.929	10	422.929	0.51385	422.929	10	422.929	0.562629	422.929	10	422.929	0.26281	422.929	10	422.929	0.318229	422.929	10	422.929	0.31777	422.929	10	422.929	0.48389	422.929	10	422.929	0.480161	422.929	10	422.929	0.478947	422.929	10	422.929	0.429838	422.929	10	422.929	0.52181	422.929	10	422.929	0.553261
422.005	0.0217048	422.005	10	422.005	0.475917	422.005	10	422.005	0.554667	422.005	10	422.005	0.603632	422.005	10	422.005	0.276031	422.005	10	422.005	0.335481	422.005	10	422.005	0.333912	422.005	10	422.005	0.51583	422.005	10	422.005	0.512392	422.005	10	422.005	0.511501	422.005	10	422.005	0.457913	422.005	10	422.005	0.557793	422.005	10	422.005	0.590836
420.926	0.021376	420.926	10	420.926	0.520909	420.926	10	420.926	0.60973	420.926	10	420.926	0.664583	420.926	10	420.926	0.293503	420.926	4.41583	420.926	0.358436	420.926	10	420.926	0.355348	420.926	10	420.926	0.56171	420.926	10	420.926	0.558188	420.926	10	420.926	0.557078	420.926	10	420.926	0.49677	420.926	10	420.926	0.608976	420.926	10	420.926	0.643684
420.002	0.0211754	420.002	10	420.002	0.578991	420.002	10	420.002	0.677692	420.002	10	420.002	0.738828	420.002	10	420.002	0.315131	420.002	10	420.002	0.386807	420.002	10	420.002	0.382353	420.002	10	420.002	0.617476	420.002	10	420.002	0.615243	420.002	10	420.002	0.612179	420.002	10	420.002	0.545587	420.002	10	420.002	0.671242	420.002	10	420.002	0.71077
418.924	0.0205402	418.924	3.9201	418.924	0.648501	418.924	10	418.924	0.760723	418.924	4.31817	418.924	0.831015	418.924	4.16863	418.924	0.340093	418.924	10	418.924	0.41915	418.924	10	418.924	0.413176	418.924	5.45851	418.924	0.684604	418.924	10	418.924	0.684276	418.924	10	418.924	0.682434	418.924	10	418.924	0.605064	418.924	10	418.924	0.747583	418.924	5.48152	418.924	0.79226
417.999	0.0205018	417.999	4.22177	417.999	0.70392	417.999	10	417.999	0.831119	417.999	4.1848	417.999	0.906143	417.999	3.74295	417.999	0.360373	417.999	3.699	417.999	0.445479	417.999	10	417.999	0.437893	417.999	10	417.999	0.739102	417.999	3.79254	417.999	0.741192	417.999	10	417.999	0.737522	417.999	3.89799	417.999	0.654416	417.999	10	417.999	0.810228	417.999	10	417.999	0.860109
417.074	0.0204077	417.074	10	417.074	0.7501	417.074	10	417.074	0.885541	417.074	10	417.074	0.966096	417.074	10	417.074	0.375742	417.074	5.41461	417.074	0.466336	417.074	4.11295	417.074	0.457218	417.074	4.03528	417.074	0.782686	417.074	10	417.074	0.786321	417.074	4.41063	417.074	0.781722	417.074	10	417.074	0.69366	417.074	10	417.074	0.861978	417.074	10	417.074	0.914735
415.995	0.0201741	415.995	4.55178	415.995	0.800695	415.995	10	415.995	0.946693	415.995	3.93872	415.995	1.03229	415.995	4.1897	415.995	0.392434	415.995	10	415.995	0.4889	415.995	4.12799	415.995	0.478923	415.995	10	415.995	0.83056	415.995	3.84598	415.995	0.837615	415.995	10	415.995	0.831896	415.995	5.06643	415.995	0.736735	415.995	4.31229	415.995	0.918669	415.995	10	415.995	0.976554
415.07	0.0198053	415.07	10	415.07	0.837221	415.07	10	415.07	0.992633	415.07	10	415.07	1.08151	415.07	4.35376	415.07	0.404998	415.07	4.3679	415.07	0.505827	415.07	4.77489	415.07	0.493916	415.07	10	415.07	0.867427	415.07	10	415.07	0.876379	415.07	10	415.07	0.869378	415.07	10	415.07	0.77056	415.07	3.75702	415.07	0.960834	415.07	4.11286	415.07	1.02036
413.99	0.0195793	413.99	3.77505	413.99	0.851786	413.99	10	413.99	1.00851	413.99	10	413.99	1.10191	413.99	10	413.99	0.409541	413.99	10	413.99	0.512722	413.99	10	413.99	0.498918	413.99	5.36086	413.99	0.879428	413.99	3.93982	413.99	0.8927	413.99	10	413.99	0.882657	413.99	3.81809	413.99	0.783751	413.99	10	413.99	0.976234	413.99	4.06386	413.99	1.03755
413.065	0.0193496	413.065	10	413.065	0.843062	413.065	4.17357	413.065	0.999542	413.065	4.03108	413.065	1.08804	413.065	5.35534	413.065	0.406801	413.065	10	413.065	0.510221	413.065	10	413.065	0.494285	413.065	10	413.065	0.872288	413.065	10	413.065	0.886042	413.065	10	413.065	0.874576	413.065	10	413.065	0.778169	413.065	4.03664	413.065	0.968047	413.065	10	413.065	1.0286
411.985	0.0191542	411.985	4.07677	411.985	0.820268	411.985	4.15156	411.985	0.968973	411.985	10	411.985	1.0553	411.985	10	411.985	0.399007	411.985	10	411.985	0.501289	411.985	4.12468	411.985	0.483798	411.985	10	411.985	0.849258	411.985	10	411.985	0.864563	411.985	10	411.985	0.851861	411.985	3.59282	411.985	0.760769	411.985	4.87527	411.985	0.940162	411.985	10	411.985	0.99986
411.059	0.0188915	411.059	10	411.059	0.794083	411.059	10	411.059	0.936329	411.059	5.39876	411.059	1.01928	411.059	4.14995	411.059	0.390622	411.059	10	411.059	0.491243	411.059	3.65905	411.059	0.471648	411.059	10	411.059	0.823341	411.059	3.891	411.059	0.840573	411.059	4.05276	411.059	0.827042	411.059	10	411.059	0.739739	411.059	10	411.059	0.911706	411.059	10	411.059	0.968608
409.979	0.018663	409.979	3.38912	409.979	0.75122	409.979	3.79846	409.979	0.883673	409.979	4.77231	409.979	0.959082	409.979	10	409.979	0.376605	409.979	3.70893	409.979	0.475096	409.979	10	409.979	0.453018	409.979	10	409.979	0.781575	409.979	10	409.979	0.801917	409.979	10	409.979	0.784606	409.979	4.14368	409.979	0.704984	409.979	4.47261	409.979	0.863607	409.979	10	409.979	0.915163
409.053	0.0185845	409.053	4.7587	409.053	0.706314	409.053	4.45274	409.053	0.827527	409.053	10	409.053	0.897064	409.053	4.05609	409.053	0.363538	409.053	10	409.053	0.458904	409.053	4.15106	409.053	0.434063	409.053	10	409.053	0.739043	409.053	10	409.053	0.762048	409.053	10	409.053	0.740895	409.053	10	409.053	0.670034	409.053	10	409.053	0.812353	409.053	3.95881	409.053	0.862218
407.973	0.018456	407.973	3.59457	407.973	0.66812	407.973	10	407.973	0.777943	407.973	10	407.973	0.840818	407.973	3.83139	407.973	0.352115	407.973	3.64876	407.973	0.445633	407.973	10	407.973	0.417303	407.973	10	407.973	0.703077	407.973	4.37871	407.973	0.725767	407.973	10	407.973	0.702194	407.973	10	407.973	0.639103	407.973	10	407.973	0.767013	407.973	10	407.973	0.81255
407.046	0.0182566	407.046	4.52261	407.046	0.637571	407.046	10	407.046	0.739266	407.046	10	407.046	0.796972	407.046	10	407.046	0.344008	407.046	10	407.046	0.43635	407.046	10	407.046	0.404811	407.046	10	407.046	0.67328	407.046	4.19237	407.046	0.699599	407.046	4.13638	407.046	0.673879	407.046	4.22884	407.046	0.615402	407.046	4.0233	407.046	0.731565	407.046	4.41812	407.046	0.774
405.965	0.0180935	405.965	3.59629	405.965	0.607636	405.965	3.98979	405.965	0.699422	405.965	10	405.965	0.752698	405.965	10	405.965	0.33599	405.965	10	405.965	0.427504	405.965	10	405.965	0.393044	405.965	3.8173	405.965	0.645831	405.965	4.48726	405.965	0.673336	405.965	10	405.965	0.643693	405.965	10	405.965	0.591565	405.965	10	405.965	0.696211	405.965	10	405.965	0.735148
405.039	0.0180332	405.039	3.80172	405.039	0.580102	405.039	10	405.039	0.663776	405.039	4.16201	405.039	0.710959	405.039	5.4081	405.039	0.329763	405.039	3.87267	405.039	0.420643	405.039	3.79654	405.039	0.382201	405.039	4.05359	405.039	0.619588	405.039	10	405.039	0.650675	405.039	4.14809	405.039	0.618371	405.039	4.13445	405.039	0.570593	405.039	3.83181	405.039	0.663492	405.039	3.93015	405.039	0.699755
403.957	0.0180455	403.957	10	403.957	0.55059	403.957	10	403.957	0.624155	403.957	10	403.957	0.666054	403.957	10	403.957	0.324149	403.957	10	403.957	0.414677	403.957	10	403.957	0.37173	403.957	10	403.957	0.592821	403.957	4.13611	403.957	0.627059	403.957	5.3728	403.957	0.589028	403.957	3.73523	403.957	0.548318	403.957	4.08592	403.957	0.627704	403.957	10	403.957	0.660659
403.031	0.0181269	403.031	5.03939	403.031	0.531969	403.031	10	403.031	0.599592	403.031	4.7594	403.031	0.635223	403.031	4.40951	403.031	0.321348	403.031	10	403.031	0.412441	403.031	4.50587	403.031	0.366091	403.031	10	403.031	0.57576	403.031	10	403.031	0.613049	403.031	10	403.031	0.572173	403.031	10	403.031	0.535055	403.031	4.0152	403.031	0.605323	403.031	4.5681	403.031	0.635786
401.949	0.0182246	401.949	10	401.949	0.512741	401.949	10	401.949	0.571909	401.949	10	401.949	0.603755	401.949	10	401.949	0.319058	401.949	3.96652	401.949	0.411459	401.949	4.0301	401.949	0.360443	401.949	4.63298	401.949	0.55832	401.949	4.04515	401.949	0.599076	401.949	10	401.949	0.554188	401.949	3.83785	401.949	0.52124	401.949	10	401.949	0.581197	401.949	10	401.949	0.609332
401.022	0.0183506	401.022	4.38087	401.022	0.50217	401.022	4.42429	401.022	0.556871	401.022	10	401.022	0.58595	401.022	10	401.022	0.318495	401.022	4.84253	401.022	0.410845	401.022	3.84493	401.022	0.35726	401.022	10	401.022	0.54832	401.022	10	401.022	0.590952	401.022	10	401.022	0.544157	401.022	10	401.022	0.514049	401.022	3.98265	401.022	0.567117	401.022	4.55006	401.022	0.594112
399.94	0.0186118	399.94	10	399.94	0.487787	399.94	10	399.94	0.535842	399.94	10	399.94	0.56071	399.94	10	399.94	0.317949	399.94	10	399.94	0.412406	399.94	4.2061	399.94	0.354195	399.94	10	399.94	0.536275	399.94	4.62268	399.94	0.581954	399.94	10	399.94	0.530775	399.94	10	399.94	0.504095	399.94	4.08319	399.94	0.549483	399.94	5.05548	399.94	0.573055
bper alone
bper alone
Collection Time: 10/12/2013 10:43:26 PM
Operator Name :
Scan Software Version: 3.00(182)
Parameter List :
Instrument Cary 50
Instrument Version 3.00
Start (nm) 700.0
Stop (nm) 400.0
X Mode Nanometers
Y Mode Abs
UV-Vis Scan Rate (nm/min) 600.00
UV-Vis Data Interval (nm) 1.00
UV-Vis Ave. Time (sec) 0.1000
Beam Mode Dual Beam
Baseline Correction Off
Cycle Mode Off
Comments
Method Log :
Method Name : C:\Users\chemuser\Desktop\Pellock\heme spectra.MSW
Date/Time stamp: 10/11/2013 11:18:31 PM
Method Modifications:
Cell Changer 6x6 Changed: 10/11/2013 11:01:28 PM	Old:1	New:0
UVVIS SAT Changed: 10/11/2013 11:02:03 PM	Old:0.0125	New:0.1000
NIR SAT Changed: 10/11/2013 11:02:03 PM	Old:0.0125	New:0.1000
Common SAT Changed: 10/11/2013 11:02:03 PM	Old:0.0125	New:0.1000
UVVIS SAT Changed: 10/11/2013 11:02:19 PM	Old:0.1000	New:0.0125
NIR SAT Changed: 10/11/2013 11:02:19 PM	Old:0.1000	New:0.0125
Common SAT Changed: 10/11/2013 11:02:19 PM	Old:0.1000	New:0.0125
UVVIS SAT Changed: 10/11/2013 11:02:31 PM	Old:0.0125	New:0.5000
NIR SAT Changed: 10/11/2013 11:02:31 PM	Old:0.0125	New:0.5000
Common SAT Changed: 10/11/2013 11:02:31 PM	Old:0.0125	New:0.5000
UVVIS SAT Changed: 10/11/2013 11:02:38 PM	Old:0.5000	New:0.1000
NIR SAT Changed: 10/11/2013 11:02:38 PM	Old:0.5000	New:0.1000
Common SAT Changed: 10/11/2013 11:02:38 PM	Old:0.5000	New:0.1000
Temp Controller Changed: 10/11/2013 11:02:53 PM	Old:0	New:2
Sipper Type Changed: 10/11/2013 11:02:53 PM	Old:Internal RSA	New:External sipper
Saved as C:\Users\chemuser\Desktop\Pellock\heme spectra.MSW
Opened C:\Users\chemuser\Desktop\Pellock\heme spectra.MSW
End Method Modifications
<Current Wavelength>	401
mr1 4hrs ox #1
mr1 4hrs ox #1
Collection Time: 10/12/2013 10:45:30 PM
Operator Name :
Scan Software Version: 3.00(182)
Parameter List :
Instrument Cary 50
Instrument Version 3.00
Start (nm) 700.0
Stop (nm) 400.0
X Mode Nanometers
Y Mode Abs
UV-Vis Scan Rate (nm/min) 600.00
UV-Vis Data Interval (nm) 1.00
UV-Vis Ave. Time (sec) 0.1000
Beam Mode Dual Beam
Baseline Correction Off
Cycle Mode Off
Comments
Method Log :
Method Name : C:\Users\chemuser\Desktop\Pellock\heme spectra.MSW
Date/Time stamp: 10/11/2013 11:18:31 PM
Method Modifications:
Cell Changer 6x6 Changed: 10/11/2013 11:01:28 PM	Old:1	New:0
UVVIS SAT Changed: 10/11/2013 11:02:03 PM	Old:0.0125	New:0.1000
NIR SAT Changed: 10/11/2013 11:02:03 PM	Old:0.0125	New:0.1000
Common SAT Changed: 10/11/2013 11:02:03 PM	Old:0.0125	New:0.1000
UVVIS SAT Changed: 10/11/2013 11:02:19 PM	Old:0.1000	New:0.0125
NIR SAT Changed: 10/11/2013 11:02:19 PM	Old:0.1000	New:0.0125
Common SAT Changed: 10/11/2013 11:02:19 PM	Old:0.1000	New:0.0125
UVVIS SAT Changed: 10/11/2013 11:02:31 PM	Old:0.0125	New:0.5000
NIR SAT Changed: 10/11/2013 11:02:31 PM	Old:0.0125	New:0.5000
Common SAT Changed: 10/11/2013 11:02:31 PM	Old:0.0125	New:0.5000
UVVIS SAT Changed: 10/11/2013 11:02:38 PM	Old:0.5000	New:0.1000
NIR SAT Changed: 10/11/2013 11:02:38 PM	Old:0.5000	New:0.1000
Common SAT Changed: 10/11/2013 11:02:38 PM	Old:0.5000	New:0.1000
Temp Controller Changed: 10/11/2013 11:02:53 PM	Old:0	New:2
Sipper Type Changed: 10/11/2013 11:02:53 PM	Old:Internal RSA	New:External sipper
Saved as C:\Users\chemuser\Desktop\Pellock\heme spectra.MSW
Opened C:\Users\chemuser\Desktop\Pellock\heme spectra.MSW
End Method Modifications
<Current Wavelength>	401
mr1 4hrs red #1
mr1 4hrs red #1
Collection Time: 10/12/2013 10:47:26 PM
Operator Name :
Scan Software Version: 3.00(182)
Parameter List :
Instrument Cary 50
Instrument Version 3.00
Start (nm) 700.0
Stop (nm) 400.0
X Mode Nanometers
Y Mode Abs
UV-Vis Scan Rate (nm/min) 600.00
UV-Vis Data Interval (nm) 1.00
UV-Vis Ave. Time (sec) 0.1000
Beam Mode Dual Beam
Baseline Correction Off
Cycle Mode Off
Comments
Method Log :
Method Name : C:\Users\chemuser\Desktop\Pellock\heme spectra.MSW
Date/Time stamp: 10/11/2013 11:18:31 PM
Method Modifications:
Cell Changer 6x6 Changed: 10/11/2013 11:01:28 PM	Old:1	New:0
UVVIS SAT Changed: 10/11/2013 11:02:03 PM	Old:0.0125	New:0.1000
NIR SAT Changed: 10/11/2013 11:02:03 PM	Old:0.0125	New:0.1000
Common SAT Changed: 10/11/2013 11:02:03 PM	Old:0.0125	New:0.1000
UVVIS SAT Changed: 10/11/2013 11:02:19 PM	Old:0.1000	New:0.0125
NIR SAT Changed: 10/11/2013 11:02:19 PM	Old:0.1000	New:0.0125
Common SAT Changed: 10/11/2013 11:02:19 PM	Old:0.1000	New:0.0125
UVVIS SAT Changed: 10/11/2013 11:02:31 PM	Old:0.0125	New:0.5000
NIR SAT Changed: 10/11/2013 11:02:31 PM	Old:0.0125	New:0.5000
Common SAT Changed: 10/11/2013 11:02:31 PM	Old:0.0125	New:0.5000
UVVIS SAT Changed: 10/11/2013 11:02:38 PM	Old:0.5000	New:0.1000
NIR SAT Changed: 10/11/2013 11:02:38 PM	Old:0.5000	New:0.1000
Common SAT Changed: 10/11/2013 11:02:38 PM	Old:0.5000	New:0.1000
Temp Controller Changed: 10/11/2013 11:02:53 PM	Old:0	New:2
Sipper Type Changed: 10/11/2013 11:02:53 PM	Old:Internal RSA	New:External sipper
Saved as C:\Users\chemuser\Desktop\Pellock\heme spectra.MSW
Opened C:\Users\chemuser\Desktop\Pellock\heme spectra.MSW
End Method Modifications
<Current Wavelength>	401
mr1 4hrs ox #2
mr1 4hrs ox #2
Collection Time: 10/12/2013 10:49:08 PM
Operator Name :
Scan Software Version: 3.00(182)
Parameter List :
Instrument Cary 50
Instrument Version 3.00
Start (nm) 700.0
Stop (nm) 400.0
X Mode Nanometers
Y Mode Abs
UV-Vis Scan Rate (nm/min) 600.00
UV-Vis Data Interval (nm) 1.00
UV-Vis Ave. Time (sec) 0.1000
Beam Mode Dual Beam
Baseline Correction Off
Cycle Mode Off
Comments
Method Log :
Method Name : C:\Users\chemuser\Desktop\Pellock\heme spectra.MSW
Date/Time stamp: 10/11/2013 11:18:31 PM
Method Modifications:
Cell Changer 6x6 Changed: 10/11/2013 11:01:28 PM	Old:1	New:0
UVVIS SAT Changed: 10/11/2013 11:02:03 PM	Old:0.0125	New:0.1000
NIR SAT Changed: 10/11/2013 11:02:03 PM	Old:0.0125	New:0.1000
Common SAT Changed: 10/11/2013 11:02:03 PM	Old:0.0125	New:0.1000
UVVIS SAT Changed: 10/11/2013 11:02:19 PM	Old:0.1000	New:0.0125
NIR SAT Changed: 10/11/2013 11:02:19 PM	Old:0.1000	New:0.0125
Common SAT Changed: 10/11/2013 11:02:19 PM	Old:0.1000	New:0.0125
UVVIS SAT Changed: 10/11/2013 11:02:31 PM	Old:0.0125	New:0.5000
NIR SAT Changed: 10/11/2013 11:02:31 PM	Old:0.0125	New:0.5000
Common SAT Changed: 10/11/2013 11:02:31 PM	Old:0.0125	New:0.5000
UVVIS SAT Changed: 10/11/2013 11:02:38 PM	Old:0.5000	New:0.1000
NIR SAT Changed: 10/11/2013 11:02:38 PM	Old:0.5000	New:0.1000
Common SAT Changed: 10/11/2013 11:02:38 PM	Old:0.5000	New:0.1000
Temp Controller Changed: 10/11/2013 11:02:53 PM	Old:0	New:2
Sipper Type Changed: 10/11/2013 11:02:53 PM	Old:Internal RSA	New:External sipper
Saved as C:\Users\chemuser\Desktop\Pellock\heme spectra.MSW
Opened C:\Users\chemuser\Desktop\Pellock\heme spectra.MSW
End Method Modifications
<Current Wavelength>	401
mr1 4hrs red #2
mr1 4hrs red #2
Collection Time: 10/12/2013 10:51:09 PM
Operator Name :
Scan Software Version: 3.00(182)
Parameter List :
Instrument Cary 50
Instrument Version 3.00
Start (nm) 700.0
Stop (nm) 400.0
X Mode Nanometers
Y Mode Abs
UV-Vis Scan Rate (nm/min) 600.00
UV-Vis Data Interval (nm) 1.00
UV-Vis Ave. Time (sec) 0.1000
Beam Mode Dual Beam
Baseline Correction Off
Cycle Mode Off
Comments
Method Log :
Method Name : C:\Users\chemuser\Desktop\Pellock\heme spectra.MSW
Date/Time stamp: 10/11/2013 11:18:31 PM
Method Modifications:
Cell Changer 6x6 Changed: 10/11/2013 11:01:28 PM	Old:1	New:0
UVVIS SAT Changed: 10/11/2013 11:02:03 PM	Old:0.0125	New:0.1000
NIR SAT Changed: 10/11/2013 11:02:03 PM	Old:0.0125	New:0.1000
Common SAT Changed: 10/11/2013 11:02:03 PM	Old:0.0125	New:0.1000
UVVIS SAT Changed: 10/11/2013 11:02:19 PM	Old:0.1000	New:0.0125
NIR SAT Changed: 10/11/2013 11:02:19 PM	Old:0.1000	New:0.0125
Common SAT Changed: 10/11/2013 11:02:19 PM	Old:0.1000	New:0.0125
UVVIS SAT Changed: 10/11/2013 11:02:31 PM	Old:0.0125	New:0.5000
NIR SAT Changed: 10/11/2013 11:02:31 PM	Old:0.0125	New:0.5000
Common SAT Changed: 10/11/2013 11:02:31 PM	Old:0.0125	New:0.5000
UVVIS SAT Changed: 10/11/2013 11:02:38 PM	Old:0.5000	New:0.1000
NIR SAT Changed: 10/11/2013 11:02:38 PM	Old:0.5000	New:0.1000
Common SAT Changed: 10/11/2013 11:02:38 PM	Old:0.5000	New:0.1000
Temp Controller Changed: 10/11/2013 11:02:53 PM	Old:0	New:2
Sipper Type Changed: 10/11/2013 11:02:53 PM	Old:Internal RSA	New:External sipper
Saved as C:\Users\chemuser\Desktop\Pellock\heme spectra.MSW
Opened C:\Users\chemuser\Desktop\Pellock\heme spectra.MSW
End Method Modifications
<Current Wavelength>	401
mr1 4hrs ox #3
mr1 4hrs ox #3
Collection Time: 10/12/2013 10:52:56 PM
Operator Name :
Scan Software Version: 3.00(182)
Parameter List :
Instrument Cary 50
Instrument Version 3.00
Start (nm) 700.0
Stop (nm) 400.0
X Mode Nanometers
Y Mode Abs
UV-Vis Scan Rate (nm/min) 600.00
UV-Vis Data Interval (nm) 1.00
UV-Vis Ave. Time (sec) 0.1000
Beam Mode Dual Beam
Baseline Correction Off
Cycle Mode Off
Comments
Method Log :
Method Name : C:\Users\chemuser\Desktop\Pellock\heme spectra.MSW
Date/Time stamp: 10/11/2013 11:18:31 PM
Method Modifications:
Cell Changer 6x6 Changed: 10/11/2013 11:01:28 PM	Old:1	New:0
UVVIS SAT Changed: 10/11/2013 11:02:03 PM	Old:0.0125	New:0.1000
NIR SAT Changed: 10/11/2013 11:02:03 PM	Old:0.0125	New:0.1000
Common SAT Changed: 10/11/2013 11:02:03 PM	Old:0.0125	New:0.1000
UVVIS SAT Changed: 10/11/2013 11:02:19 PM	Old:0.1000	New:0.0125
NIR SAT Changed: 10/11/2013 11:02:19 PM	Old:0.1000	New:0.0125
Common SAT Changed: 10/11/2013 11:02:19 PM	Old:0.1000	New:0.0125
UVVIS SAT Changed: 10/11/2013 11:02:31 PM	Old:0.0125	New:0.5000
NIR SAT Changed: 10/11/2013 11:02:31 PM	Old:0.0125	New:0.5000
Common SAT Changed: 10/11/2013 11:02:31 PM	Old:0.0125	New:0.5000
UVVIS SAT Changed: 10/11/2013 11:02:38 PM	Old:0.5000	New:0.1000
NIR SAT Changed: 10/11/2013 11:02:38 PM	Old:0.5000	New:0.1000
Common SAT Changed: 10/11/2013 11:02:38 PM	Old:0.5000	New:0.1000
Temp Controller Changed: 10/11/2013 11:02:53 PM	Old:0	New:2
Sipper Type Changed: 10/11/2013 11:02:53 PM	Old:Internal RSA	New:External sipper
Saved as C:\Users\chemuser\Desktop\Pellock\heme spectra.MSW
Opened C:\Users\chemuser\Desktop\Pellock\heme spectra.MSW
End Method Modifications
<Current Wavelength>	401
mr1 4hrs red #3
mr1 4hrs red #3
Collection Time: 10/12/2013 10:54:28 PM
Operator Name :
Scan Software Version: 3.00(182)
Parameter List :
Instrument Cary 50
Instrument Version 3.00
Start (nm) 700.0
Stop (nm) 400.0
X Mode Nanometers
Y Mode Abs
UV-Vis Scan Rate (nm/min) 600.00
UV-Vis Data Interval (nm) 1.00
UV-Vis Ave. Time (sec) 0.1000
Beam Mode Dual Beam
Baseline Correction Off
Cycle Mode Off
Comments
Method Log :
Method Name : C:\Users\chemuser\Desktop\Pellock\heme spectra.MSW
Date/Time stamp: 10/11/2013 11:18:31 PM
Method Modifications:
Cell Changer 6x6 Changed: 10/11/2013 11:01:28 PM	Old:1	New:0
UVVIS SAT Changed: 10/11/2013 11:02:03 PM	Old:0.0125	New:0.1000
NIR SAT Changed: 10/11/2013 11:02:03 PM	Old:0.0125	New:0.1000
Common SAT Changed: 10/11/2013 11:02:03 PM	Old:0.0125	New:0.1000
UVVIS SAT Changed: 10/11/2013 11:02:19 PM	Old:0.1000	New:0.0125
NIR SAT Changed: 10/11/2013 11:02:19 PM	Old:0.1000	New:0.0125
Common SAT Changed: 10/11/2013 11:02:19 PM	Old:0.1000	New:0.0125
UVVIS SAT Changed: 10/11/2013 11:02:31 PM	Old:0.0125	New:0.5000
NIR SAT Changed: 10/11/2013 11:02:31 PM	Old:0.0125	New:0.5000
Common SAT Changed: 10/11/2013 11:02:31 PM	Old:0.0125	New:0.5000
UVVIS SAT Changed: 10/11/2013 11:02:38 PM	Old:0.5000	New:0.1000
NIR SAT Changed: 10/11/2013 11:02:38 PM	Old:0.5000	New:0.1000
Common SAT Changed: 10/11/2013 11:02:38 PM	Old:0.5000	New:0.1000
Temp Controller Changed: 10/11/2013 11:02:53 PM	Old:0	New:2
Sipper Type Changed: 10/11/2013 11:02:53 PM	Old:Internal RSA	New:External sipper
Saved as C:\Users\chemuser\Desktop\Pellock\heme spectra.MSW
Opened C:\Users\chemuser\Desktop\Pellock\heme spectra.MSW
End Method Modifications
<Current Wavelength>	401
15 4hrs ox #1
15 4hrs ox #1
Collection Time: 10/12/2013 10:58:42 PM
Operator Name :
Scan Software Version: 3.00(182)
Parameter List :
Instrument Cary 50
Instrument Version 3.00
Start (nm) 700.0
Stop (nm) 400.0
X Mode Nanometers
Y Mode Abs
UV-Vis Scan Rate (nm/min) 600.00
UV-Vis Data Interval (nm) 1.00
UV-Vis Ave. Time (sec) 0.1000
Beam Mode Dual Beam
Baseline Correction Off
Cycle Mode Off
Comments
Method Log :
Method Name : C:\Users\chemuser\Desktop\Pellock\heme spectra.MSW
Date/Time stamp: 10/11/2013 11:18:31 PM
Method Modifications:
Cell Changer 6x6 Changed: 10/11/2013 11:01:28 PM	Old:1	New:0
UVVIS SAT Changed: 10/11/2013 11:02:03 PM	Old:0.0125	New:0.1000
NIR SAT Changed: 10/11/2013 11:02:03 PM	Old:0.0125	New:0.1000
Common SAT Changed: 10/11/2013 11:02:03 PM	Old:0.0125	New:0.1000
UVVIS SAT Changed: 10/11/2013 11:02:19 PM	Old:0.1000	New:0.0125
NIR SAT Changed: 10/11/2013 11:02:19 PM	Old:0.1000	New:0.0125
Common SAT Changed: 10/11/2013 11:02:19 PM	Old:0.1000	New:0.0125
UVVIS SAT Changed: 10/11/2013 11:02:31 PM	Old:0.0125	New:0.5000
NIR SAT Changed: 10/11/2013 11:02:31 PM	Old:0.0125	New:0.5000
Common SAT Changed: 10/11/2013 11:02:31 PM	Old:0.0125	New:0.5000
UVVIS SAT Changed: 10/11/2013 11:02:38 PM	Old:0.5000	New:0.1000
NIR SAT Changed: 10/11/2013 11:02:38 PM	Old:0.5000	New:0.1000
Common SAT Changed: 10/11/2013 11:02:38 PM	Old:0.5000	New:0.1000
Temp Controller Changed: 10/11/2013 11:02:53 PM	Old:0	New:2
Sipper Type Changed: 10/11/2013 11:02:53 PM	Old:Internal RSA	New:External sipper
Saved as C:\Users\chemuser\Desktop\Pellock\heme spectra.MSW
Opened C:\Users\chemuser\Desktop\Pellock\heme spectra.MSW
End Method Modifications
<Current Wavelength>	401
15 4hrs red #1
15 4hrs red #1
Collection Time: 10/12/2013 11:00:41 PM
Operator Name :
Scan Software Version: 3.00(182)
Parameter List :
Instrument Cary 50
Instrument Version 3.00
Start (nm) 700.0
Stop (nm) 400.0
X Mode Nanometers
Y Mode Abs
UV-Vis Scan Rate (nm/min) 600.00
UV-Vis Data Interval (nm) 1.00
UV-Vis Ave. Time (sec) 0.1000
Beam Mode Dual Beam
Baseline Correction Off
Cycle Mode Off
Comments
Method Log :
Method Name : C:\Users\chemuser\Desktop\Pellock\heme spectra.MSW
Date/Time stamp: 10/11/2013 11:18:31 PM
Method Modifications:
Cell Changer 6x6 Changed: 10/11/2013 11:01:28 PM	Old:1	New:0
UVVIS SAT Changed: 10/11/2013 11:02:03 PM	Old:0.0125	New:0.1000
NIR SAT Changed: 10/11/2013 11:02:03 PM	Old:0.0125	New:0.1000
Common SAT Changed: 10/11/2013 11:02:03 PM	Old:0.0125	New:0.1000
UVVIS SAT Changed: 10/11/2013 11:02:19 PM	Old:0.1000	New:0.0125
NIR SAT Changed: 10/11/2013 11:02:19 PM	Old:0.1000	New:0.0125
Common SAT Changed: 10/11/2013 11:02:19 PM	Old:0.1000	New:0.0125
UVVIS SAT Changed: 10/11/2013 11:02:31 PM	Old:0.0125	New:0.5000
NIR SAT Changed: 10/11/2013 11:02:31 PM	Old:0.0125	New:0.5000
Common SAT Changed: 10/11/2013 11:02:31 PM	Old:0.0125	New:0.5000
UVVIS SAT Changed: 10/11/2013 11:02:38 PM	Old:0.5000	New:0.1000
NIR SAT Changed: 10/11/2013 11:02:38 PM	Old:0.5000	New:0.1000
Common SAT Changed: 10/11/2013 11:02:38 PM	Old:0.5000	New:0.1000
Temp Controller Changed: 10/11/2013 11:02:53 PM	Old:0	New:2
Sipper Type Changed: 10/11/2013 11:02:53 PM	Old:Internal RSA	New:External sipper
Saved as C:\Users\chemuser\Desktop\Pellock\heme spectra.MSW
Opened C:\Users\chemuser\Desktop\Pellock\heme spectra.MSW
End Method Modifications
<Current Wavelength>	401
15 4hrs ox #2
15 4hrs ox #2
Collection Time: 10/12/2013 11:02:27 PM
Operator Name :
Scan Software Version: 3.00(182)
Parameter List :
Instrument Cary 50
Instrument Version 3.00
Start (nm) 700.0
Stop (nm) 400.0
X Mode Nanometers
Y Mode Abs
UV-Vis Scan Rate (nm/min) 600.00
UV-Vis Data Interval (nm) 1.00
UV-Vis Ave. Time (sec) 0.1000
Beam Mode Dual Beam
Baseline Correction Off
Cycle Mode Off
Comments
Method Log :
Method Name : C:\Users\chemuser\Desktop\Pellock\heme spectra.MSW
Date/Time stamp: 10/11/2013 11:18:31 PM
Method Modifications:
Cell Changer 6x6 Changed: 10/11/2013 11:01:28 PM	Old:1	New:0
UVVIS SAT Changed: 10/11/2013 11:02:03 PM	Old:0.0125	New:0.1000
NIR SAT Changed: 10/11/2013 11:02:03 PM	Old:0.0125	New:0.1000
Common SAT Changed: 10/11/2013 11:02:03 PM	Old:0.0125	New:0.1000
UVVIS SAT Changed: 10/11/2013 11:02:19 PM	Old:0.1000	New:0.0125
NIR SAT Changed: 10/11/2013 11:02:19 PM	Old:0.1000	New:0.0125
Common SAT Changed: 10/11/2013 11:02:19 PM	Old:0.1000	New:0.0125
UVVIS SAT Changed: 10/11/2013 11:02:31 PM	Old:0.0125	New:0.5000
NIR SAT Changed: 10/11/2013 11:02:31 PM	Old:0.0125	New:0.5000
Common SAT Changed: 10/11/2013 11:02:31 PM	Old:0.0125	New:0.5000
UVVIS SAT Changed: 10/11/2013 11:02:38 PM	Old:0.5000	New:0.1000
NIR SAT Changed: 10/11/2013 11:02:38 PM	Old:0.5000	New:0.1000
Common SAT Changed: 10/11/2013 11:02:38 PM	Old:0.5000	New:0.1000
Temp Controller Changed: 10/11/2013 11:02:53 PM	Old:0	New:2
Sipper Type Changed: 10/11/2013 11:02:53 PM	Old:Internal RSA	New:External sipper
Saved as C:\Users\chemuser\Desktop\Pellock\heme spectra.MSW
Opened C:\Users\chemuser\Desktop\Pellock\heme spectra.MSW
End Method Modifications
<Current Wavelength>	401
15 4hrs red #2
15 4hrs red #2
Collection Time: 10/12/2013 11:04:27 PM
Operator Name :
Scan Software Version: 3.00(182)
Parameter List :
Instrument Cary 50
Instrument Version 3.00
Start (nm) 700.0
Stop (nm) 400.0
X Mode Nanometers
Y Mode Abs
UV-Vis Scan Rate (nm/min) 600.00
UV-Vis Data Interval (nm) 1.00
UV-Vis Ave. Time (sec) 0.1000
Beam Mode Dual Beam
Baseline Correction Off
Cycle Mode Off
Comments
Method Log :
Method Name : C:\Users\chemuser\Desktop\Pellock\heme spectra.MSW
Date/Time stamp: 10/11/2013 11:18:31 PM
Method Modifications:
Cell Changer 6x6 Changed: 10/11/2013 11:01:28 PM	Old:1	New:0
UVVIS SAT Changed: 10/11/2013 11:02:03 PM	Old:0.0125	New:0.1000
NIR SAT Changed: 10/11/2013 11:02:03 PM	Old:0.0125	New:0.1000
Common SAT Changed: 10/11/2013 11:02:03 PM	Old:0.0125	New:0.1000
UVVIS SAT Changed: 10/11/2013 11:02:19 PM	Old:0.1000	New:0.0125
NIR SAT Changed: 10/11/2013 11:02:19 PM	Old:0.1000	New:0.0125
Common SAT Changed: 10/11/2013 11:02:19 PM	Old:0.1000	New:0.0125
UVVIS SAT Changed: 10/11/2013 11:02:31 PM	Old:0.0125	New:0.5000
NIR SAT Changed: 10/11/2013 11:02:31 PM	Old:0.0125	New:0.5000
Common SAT Changed: 10/11/2013 11:02:31 PM	Old:0.0125	New:0.5000
UVVIS SAT Changed: 10/11/2013 11:02:38 PM	Old:0.5000	New:0.1000
NIR SAT Changed: 10/11/2013 11:02:38 PM	Old:0.5000	New:0.1000
Common SAT Changed: 10/11/2013 11:02:38 PM	Old:0.5000	New:0.1000
Temp Controller Changed: 10/11/2013 11:02:53 PM	Old:0	New:2
Sipper Type Changed: 10/11/2013 11:02:53 PM	Old:Internal RSA	New:External sipper
Saved as C:\Users\chemuser\Desktop\Pellock\heme spectra.MSW
Opened C:\Users\chemuser\Desktop\Pellock\heme spectra.MSW
End Method Modifications
<Current Wavelength>	401
15 4hrs ox #3
15 4hrs ox #3
Collection Time: 10/12/2013 11:06:11 PM
Operator Name :
Scan Software Version: 3.00(182)
Parameter List :
Instrument Cary 50
Instrument Version 3.00
Start (nm) 700.0
Stop (nm) 400.0
X Mode Nanometers
Y Mode Abs
UV-Vis Scan Rate (nm/min) 600.00
UV-Vis Data Interval (nm) 1.00
UV-Vis Ave. Time (sec) 0.1000
Beam Mode Dual Beam
Baseline Correction Off
Cycle Mode Off
Comments
Method Log :
Method Name : C:\Users\chemuser\Desktop\Pellock\heme spectra.MSW
Date/Time stamp: 10/11/2013 11:18:31 PM
Method Modifications:
Cell Changer 6x6 Changed: 10/11/2013 11:01:28 PM	Old:1	New:0
UVVIS SAT Changed: 10/11/2013 11:02:03 PM	Old:0.0125	New:0.1000
NIR SAT Changed: 10/11/2013 11:02:03 PM	Old:0.0125	New:0.1000
Common SAT Changed: 10/11/2013 11:02:03 PM	Old:0.0125	New:0.1000
UVVIS SAT Changed: 10/11/2013 11:02:19 PM	Old:0.1000	New:0.0125
NIR SAT Changed: 10/11/2013 11:02:19 PM	Old:0.1000	New:0.0125
Common SAT Changed: 10/11/2013 11:02:19 PM	Old:0.1000	New:0.0125
UVVIS SAT Changed: 10/11/2013 11:02:31 PM	Old:0.0125	New:0.5000
NIR SAT Changed: 10/11/2013 11:02:31 PM	Old:0.0125	New:0.5000
Common SAT Changed: 10/11/2013 11:02:31 PM	Old:0.0125	New:0.5000
UVVIS SAT Changed: 10/11/2013 11:02:38 PM	Old:0.5000	New:0.1000
NIR SAT Changed: 10/11/2013 11:02:38 PM	Old:0.5000	New:0.1000
Common SAT Changed: 10/11/2013 11:02:38 PM	Old:0.5000	New:0.1000
Temp Controller Changed: 10/11/2013 11:02:53 PM	Old:0	New:2
Sipper Type Changed: 10/11/2013 11:02:53 PM	Old:Internal RSA	New:External sipper
Saved as C:\Users\chemuser\Desktop\Pellock\heme spectra.MSW
Opened C:\Users\chemuser\Desktop\Pellock\heme spectra.MSW
End Method Modifications
<Current Wavelength>	401
15 4hrs red #3
15 4hrs red #3
Collection Time: 10/12/2013 11:07:47 PM
Operator Name :
Scan Software Version: 3.00(182)
Parameter List :
Instrument Cary 50
Instrument Version 3.00
Start (nm) 700.0
Stop (nm) 400.0
X Mode Nanometers
Y Mode Abs
UV-Vis Scan Rate (nm/min) 600.00
UV-Vis Data Interval (nm) 1.00
UV-Vis Ave. Time (sec) 0.1000
Beam Mode Dual Beam
Baseline Correction Off
Cycle Mode Off
Comments
Method Log :
Method Name : C:\Users\chemuser\Desktop\Pellock\heme spectra.MSW
Date/Time stamp: 10/11/2013 11:18:31 PM
Method Modifications:
Cell Changer 6x6 Changed: 10/11/2013 11:01:28 PM	Old:1	New:0
UVVIS SAT Changed: 10/11/2013 11:02:03 PM	Old:0.0125	New:0.1000
NIR SAT Changed: 10/11/2013 11:02:03 PM	Old:0.0125	New:0.1000
Common SAT Changed: 10/11/2013 11:02:03 PM	Old:0.0125	New:0.1000
UVVIS SAT Changed: 10/11/2013 11:02:19 PM	Old:0.1000	New:0.0125
NIR SAT Changed: 10/11/2013 11:02:19 PM	Old:0.1000	New:0.0125
Common SAT Changed: 10/11/2013 11:02:19 PM	Old:0.1000	New:0.0125
UVVIS SAT Changed: 10/11/2013 11:02:31 PM	Old:0.0125	New:0.5000
NIR SAT Changed: 10/11/2013 11:02:31 PM	Old:0.0125	New:0.5000
Common SAT Changed: 10/11/2013 11:02:31 PM	Old:0.0125	New:0.5000
UVVIS SAT Changed: 10/11/2013 11:02:38 PM	Old:0.5000	New:0.1000
NIR SAT Changed: 10/11/2013 11:02:38 PM	Old:0.5000	New:0.1000
Common SAT Changed: 10/11/2013 11:02:38 PM	Old:0.5000	New:0.1000
Temp Controller Changed: 10/11/2013 11:02:53 PM	Old:0	New:2
Sipper Type Changed: 10/11/2013 11:02:53 PM	Old:Internal RSA	New:External sipper
Saved as C:\Users\chemuser\Desktop\Pellock\heme spectra.MSW
Opened C:\Users\chemuser\Desktop\Pellock\heme spectra.MSW
End Method Modifications
<Current Wavelength>	401
mr1 8hrs ox #1
mr1 8hrs ox #1
Collection Time: 10/12/2013 11:12:58 PM
Operator Name :
Scan Software Version: 3.00(182)
Parameter List :
Instrument Cary 50
Instrument Version 3.00
Start (nm) 700.0
Stop (nm) 400.0
X Mode Nanometers
Y Mode Abs
UV-Vis Scan Rate (nm/min) 600.00
UV-Vis Data Interval (nm) 1.00
UV-Vis Ave. Time (sec) 0.1000
Beam Mode Dual Beam
Baseline Correction Off
Cycle Mode Off
Comments
Method Log :
Method Name : C:\Users\chemuser\Desktop\Pellock\heme spectra.MSW
Date/Time stamp: 10/11/2013 11:18:31 PM
Method Modifications:
Cell Changer 6x6 Changed: 10/11/2013 11:01:28 PM	Old:1	New:0
UVVIS SAT Changed: 10/11/2013 11:02:03 PM	Old:0.0125	New:0.1000
NIR SAT Changed: 10/11/2013 11:02:03 PM	Old:0.0125	New:0.1000
Common SAT Changed: 10/11/2013 11:02:03 PM	Old:0.0125	New:0.1000
UVVIS SAT Changed: 10/11/2013 11:02:19 PM	Old:0.1000	New:0.0125
NIR SAT Changed: 10/11/2013 11:02:19 PM	Old:0.1000	New:0.0125
Common SAT Changed: 10/11/2013 11:02:19 PM	Old:0.1000	New:0.0125
UVVIS SAT Changed: 10/11/2013 11:02:31 PM	Old:0.0125	New:0.5000
NIR SAT Changed: 10/11/2013 11:02:31 PM	Old:0.0125	New:0.5000
Common SAT Changed: 10/11/2013 11:02:31 PM	Old:0.0125	New:0.5000
UVVIS SAT Changed: 10/11/2013 11:02:38 PM	Old:0.5000	New:0.1000
NIR SAT Changed: 10/11/2013 11:02:38 PM	Old:0.5000	New:0.1000
Common SAT Changed: 10/11/2013 11:02:38 PM	Old:0.5000	New:0.1000
Temp Controller Changed: 10/11/2013 11:02:53 PM	Old:0	New:2
Sipper Type Changed: 10/11/2013 11:02:53 PM	Old:Internal RSA	New:External sipper
Saved as C:\Users\chemuser\Desktop\Pellock\heme spectra.MSW
Opened C:\Users\chemuser\Desktop\Pellock\heme spectra.MSW
End Method Modifications
<Current Wavelength>	401
mr1 8hrs red #1
mr1 8hrs red #1
Collection Time: 10/12/2013 11:14:23 PM
Operator Name :
Scan Software Version: 3.00(182)
Parameter List :
Instrument Cary 50
Instrument Version 3.00
Start (nm) 700.0
Stop (nm) 400.0
X Mode Nanometers
Y Mode Abs
UV-Vis Scan Rate (nm/min) 600.00
UV-Vis Data Interval (nm) 1.00
UV-Vis Ave. Time (sec) 0.1000
Beam Mode Dual Beam
Baseline Correction Off
Cycle Mode Off
Comments
Method Log :
Method Name : C:\Users\chemuser\Desktop\Pellock\heme spectra.MSW
Date/Time stamp: 10/11/2013 11:18:31 PM
Method Modifications:
Cell Changer 6x6 Changed: 10/11/2013 11:01:28 PM	Old:1	New:0
UVVIS SAT Changed: 10/11/2013 11:02:03 PM	Old:0.0125	New:0.1000
NIR SAT Changed: 10/11/2013 11:02:03 PM	Old:0.0125	New:0.1000
Common SAT Changed: 10/11/2013 11:02:03 PM	Old:0.0125	New:0.1000
UVVIS SAT Changed: 10/11/2013 11:02:19 PM	Old:0.1000	New:0.0125
NIR SAT Changed: 10/11/2013 11:02:19 PM	Old:0.1000	New:0.0125
Common SAT Changed: 10/11/2013 11:02:19 PM	Old:0.1000	New:0.0125
UVVIS SAT Changed: 10/11/2013 11:02:31 PM	Old:0.0125	New:0.5000
NIR SAT Changed: 10/11/2013 11:02:31 PM	Old:0.0125	New:0.5000
Common SAT Changed: 10/11/2013 11:02:31 PM	Old:0.0125	New:0.5000
UVVIS SAT Changed: 10/11/2013 11:02:38 PM	Old:0.5000	New:0.1000
NIR SAT Changed: 10/11/2013 11:02:38 PM	Old:0.5000	New:0.1000
Common SAT Changed: 10/11/2013 11:02:38 PM	Old:0.5000	New:0.1000
Temp Controller Changed: 10/11/2013 11:02:53 PM	Old:0	New:2
Sipper Type Changed: 10/11/2013 11:02:53 PM	Old:Internal RSA	New:External sipper
Saved as C:\Users\chemuser\Desktop\Pellock\heme spectra.MSW
Opened C:\Users\chemuser\Desktop\Pellock\heme spectra.MSW
End Method Modifications
<Current Wavelength>	401
mr1 8hrs ox #2
mr1 8hrs ox #2
Collection Time: 10/12/2013 11:15:44 PM
Operator Name :
Scan Software Version: 3.00(182)
Parameter List :
Instrument Cary 50
Instrument Version 3.00
Start (nm) 700.0
Stop (nm) 400.0
X Mode Nanometers
Y Mode Abs
UV-Vis Scan Rate (nm/min) 600.00
UV-Vis Data Interval (nm) 1.00
UV-Vis Ave. Time (sec) 0.1000
Beam Mode Dual Beam
Baseline Correction Off
Cycle Mode Off
Comments
Method Log :
Method Name : C:\Users\chemuser\Desktop\Pellock\heme spectra.MSW
Date/Time stamp: 10/11/2013 11:18:31 PM
Method Modifications:
Cell Changer 6x6 Changed: 10/11/2013 11:01:28 PM	Old:1	New:0
UVVIS SAT Changed: 10/11/2013 11:02:03 PM	Old:0.0125	New:0.1000
NIR SAT Changed: 10/11/2013 11:02:03 PM	Old:0.0125	New:0.1000
Common SAT Changed: 10/11/2013 11:02:03 PM	Old:0.0125	New:0.1000
UVVIS SAT Changed: 10/11/2013 11:02:19 PM	Old:0.1000	New:0.0125
NIR SAT Changed: 10/11/2013 11:02:19 PM	Old:0.1000	New:0.0125
Common SAT Changed: 10/11/2013 11:02:19 PM	Old:0.1000	New:0.0125
UVVIS SAT Changed: 10/11/2013 11:02:31 PM	Old:0.0125	New:0.5000
NIR SAT Changed: 10/11/2013 11:02:31 PM	Old:0.0125	New:0.5000
Common SAT Changed: 10/11/2013 11:02:31 PM	Old:0.0125	New:0.5000
UVVIS SAT Changed: 10/11/2013 11:02:38 PM	Old:0.5000	New:0.1000
NIR SAT Changed: 10/11/2013 11:02:38 PM	Old:0.5000	New:0.1000
Common SAT Changed: 10/11/2013 11:02:38 PM	Old:0.5000	New:0.1000
Temp Controller Changed: 10/11/2013 11:02:53 PM	Old:0	New:2
Sipper Type Changed: 10/11/2013 11:02:53 PM	Old:Internal RSA	New:External sipper
Saved as C:\Users\chemuser\Desktop\Pellock\heme spectra.MSW
Opened C:\Users\chemuser\Desktop\Pellock\heme spectra.MSW
End Method Modifications
<Current Wavelength>	401
mr1 8hrs red #2
mr1 8hrs red #2
Collection Time: 10/12/2013 11:17:26 PM
Operator Name :
Scan Software Version: 3.00(182)
Parameter List :
Instrument Cary 50
Instrument Version 3.00
Start (nm) 700.0
Stop (nm) 400.0
X Mode Nanometers
Y Mode Abs
UV-Vis Scan Rate (nm/min) 600.00
UV-Vis Data Interval (nm) 1.00
UV-Vis Ave. Time (sec) 0.1000
Beam Mode Dual Beam
Baseline Correction Off
Cycle Mode Off
Comments
Method Log :
Method Name : C:\Users\chemuser\Desktop\Pellock\heme spectra.MSW
Date/Time stamp: 10/11/2013 11:18:31 PM
Method Modifications:
Cell Changer 6x6 Changed: 10/11/2013 11:01:28 PM	Old:1	New:0
UVVIS SAT Changed: 10/11/2013 11:02:03 PM	Old:0.0125	New:0.1000
NIR SAT Changed: 10/11/2013 11:02:03 PM	Old:0.0125	New:0.1000
Common SAT Changed: 10/11/2013 11:02:03 PM	Old:0.0125	New:0.1000
UVVIS SAT Changed: 10/11/2013 11:02:19 PM	Old:0.1000	New:0.0125
NIR SAT Changed: 10/11/2013 11:02:19 PM	Old:0.1000	New:0.0125
Common SAT Changed: 10/11/2013 11:02:19 PM	Old:0.1000	New:0.0125
UVVIS SAT Changed: 10/11/2013 11:02:31 PM	Old:0.0125	New:0.5000
NIR SAT Changed: 10/11/2013 11:02:31 PM	Old:0.0125	New:0.5000
Common SAT Changed: 10/11/2013 11:02:31 PM	Old:0.0125	New:0.5000
UVVIS SAT Changed: 10/11/2013 11:02:38 PM	Old:0.5000	New:0.1000
NIR SAT Changed: 10/11/2013 11:02:38 PM	Old:0.5000	New:0.1000
Common SAT Changed: 10/11/2013 11:02:38 PM	Old:0.5000	New:0.1000
Temp Controller Changed: 10/11/2013 11:02:53 PM	Old:0	New:2
Sipper Type Changed: 10/11/2013 11:02:53 PM	Old:Internal RSA	New:External sipper
Saved as C:\Users\chemuser\Desktop\Pellock\heme spectra.MSW
Opened C:\Users\chemuser\Desktop\Pellock\heme spectra.MSW
End Method Modifications
<Current Wavelength>	401
mr1 8hrs ox #3
mr1 8hrs ox #3
Collection Time: 10/12/2013 11:19:00 PM
Operator Name :
Scan Software Version: 3.00(182)
Parameter List :
Instrument Cary 50
Instrument Version 3.00
Start (nm) 700.0
Stop (nm) 400.0
X Mode Nanometers
Y Mode Abs
UV-Vis Scan Rate (nm/min) 600.00
UV-Vis Data Interval (nm) 1.00
UV-Vis Ave. Time (sec) 0.1000
Beam Mode Dual Beam
Baseline Correction Off
Cycle Mode Off
Comments
Method Log :
Method Name : C:\Users\chemuser\Desktop\Pellock\heme spectra.MSW
Date/Time stamp: 10/11/2013 11:18:31 PM
Method Modifications:
Cell Changer 6x6 Changed: 10/11/2013 11:01:28 PM	Old:1	New:0
UVVIS SAT Changed: 10/11/2013 11:02:03 PM	Old:0.0125	New:0.1000
NIR SAT Changed: 10/11/2013 11:02:03 PM	Old:0.0125	New:0.1000
Common SAT Changed: 10/11/2013 11:02:03 PM	Old:0.0125	New:0.1000
UVVIS SAT Changed: 10/11/2013 11:02:19 PM	Old:0.1000	New:0.0125
NIR SAT Changed: 10/11/2013 11:02:19 PM	Old:0.1000	New:0.0125
Common SAT Changed: 10/11/2013 11:02:19 PM	Old:0.1000	New:0.0125
UVVIS SAT Changed: 10/11/2013 11:02:31 PM	Old:0.0125	New:0.5000
NIR SAT Changed: 10/11/2013 11:02:31 PM	Old:0.0125	New:0.5000
Common SAT Changed: 10/11/2013 11:02:31 PM	Old:0.0125	New:0.5000
UVVIS SAT Changed: 10/11/2013 11:02:38 PM	Old:0.5000	New:0.1000
NIR SAT Changed: 10/11/2013 11:02:38 PM	Old:0.5000	New:0.1000
Common SAT Changed: 10/11/2013 11:02:38 PM	Old:0.5000	New:0.1000
Temp Controller Changed: 10/11/2013 11:02:53 PM	Old:0	New:2
Sipper Type Changed: 10/11/2013 11:02:53 PM	Old:Internal RSA	New:External sipper
Saved as C:\Users\chemuser\Desktop\Pellock\heme spectra.MSW
Opened C:\Users\chemuser\Desktop\Pellock\heme spectra.MSW
End Method Modifications
<Current Wavelength>	401
mr1 8hrs red #3
mr1 8hrs red #3
Collection Time: 10/12/2013 11:20:32 PM
Operator Name :
Scan Software Version: 3.00(182)
Parameter List :
Instrument Cary 50
Instrument Version 3.00
Start (nm) 700.0
Stop (nm) 400.0
X Mode Nanometers
Y Mode Abs
UV-Vis Scan Rate (nm/min) 600.00
UV-Vis Data Interval (nm) 1.00
UV-Vis Ave. Time (sec) 0.1000
Beam Mode Dual Beam
Baseline Correction Off
Cycle Mode Off
Comments
Method Log :
Method Name : C:\Users\chemuser\Desktop\Pellock\heme spectra.MSW
Date/Time stamp: 10/11/2013 11:18:31 PM
Method Modifications:
Cell Changer 6x6 Changed: 10/11/2013 11:01:28 PM	Old:1	New:0
UVVIS SAT Changed: 10/11/2013 11:02:03 PM	Old:0.0125	New:0.1000
NIR SAT Changed: 10/11/2013 11:02:03 PM	Old:0.0125	New:0.1000
Common SAT Changed: 10/11/2013 11:02:03 PM	Old:0.0125	New:0.1000
UVVIS SAT Changed: 10/11/2013 11:02:19 PM	Old:0.1000	New:0.0125
NIR SAT Changed: 10/11/2013 11:02:19 PM	Old:0.1000	New:0.0125
Common SAT Changed: 10/11/2013 11:02:19 PM	Old:0.1000	New:0.0125
UVVIS SAT Changed: 10/11/2013 11:02:31 PM	Old:0.0125	New:0.5000
NIR SAT Changed: 10/11/2013 11:02:31 PM	Old:0.0125	New:0.5000
Common SAT Changed: 10/11/2013 11:02:31 PM	Old:0.0125	New:0.5000
UVVIS SAT Changed: 10/11/2013 11:02:38 PM	Old:0.5000	New:0.1000
NIR SAT Changed: 10/11/2013 11:02:38 PM	Old:0.5000	New:0.1000
Common SAT Changed: 10/11/2013 11:02:38 PM	Old:0.5000	New:0.1000
Temp Controller Changed: 10/11/2013 11:02:53 PM	Old:0	New:2
Sipper Type Changed: 10/11/2013 11:02:53 PM	Old:Internal RSA	New:External sipper
Saved as C:\Users\chemuser\Desktop\Pellock\heme spectra.MSW
Opened C:\Users\chemuser\Desktop\Pellock\heme spectra.MSW
End Method Modifications
<Current Wavelength>	401
15 8hrs ox #1
15 8hrs ox #1
Collection Time: 10/12/2013 11:24:29 PM
Operator Name :
Scan Software Version: 3.00(182)
Parameter List :
Instrument Cary 50
Instrument Version 3.00
Start (nm) 700.0
Stop (nm) 400.0
X Mode Nanometers
Y Mode Abs
UV-Vis Scan Rate (nm/min) 600.00
UV-Vis Data Interval (nm) 1.00
UV-Vis Ave. Time (sec) 0.1000
Beam Mode Dual Beam
Baseline Correction Off
Cycle Mode Off
Comments
Method Log :
Method Name : C:\Users\chemuser\Desktop\Pellock\heme spectra.MSW
Date/Time stamp: 10/11/2013 11:18:31 PM
Method Modifications:
Cell Changer 6x6 Changed: 10/11/2013 11:01:28 PM	Old:1	New:0
UVVIS SAT Changed: 10/11/2013 11:02:03 PM	Old:0.0125	New:0.1000
NIR SAT Changed: 10/11/2013 11:02:03 PM	Old:0.0125	New:0.1000
Common SAT Changed: 10/11/2013 11:02:03 PM	Old:0.0125	New:0.1000
UVVIS SAT Changed: 10/11/2013 11:02:19 PM	Old:0.1000	New:0.0125
NIR SAT Changed: 10/11/2013 11:02:19 PM	Old:0.1000	New:0.0125
Common SAT Changed: 10/11/2013 11:02:19 PM	Old:0.1000	New:0.0125
UVVIS SAT Changed: 10/11/2013 11:02:31 PM	Old:0.0125	New:0.5000
NIR SAT Changed: 10/11/2013 11:02:31 PM	Old:0.0125	New:0.5000
Common SAT Changed: 10/11/2013 11:02:31 PM	Old:0.0125	New:0.5000
UVVIS SAT Changed: 10/11/2013 11:02:38 PM	Old:0.5000	New:0.1000
NIR SAT Changed: 10/11/2013 11:02:38 PM	Old:0.5000	New:0.1000
Common SAT Changed: 10/11/2013 11:02:38 PM	Old:0.5000	New:0.1000
Temp Controller Changed: 10/11/2013 11:02:53 PM	Old:0	New:2
Sipper Type Changed: 10/11/2013 11:02:53 PM	Old:Internal RSA	New:External sipper
Saved as C:\Users\chemuser\Desktop\Pellock\heme spectra.MSW
Opened C:\Users\chemuser\Desktop\Pellock\heme spectra.MSW
End Method Modifications
<Current Wavelength>	401
15 8hrs red #1
15 8hrs red #1
Collection Time: 10/12/2013 11:25:57 PM
Operator Name :
Scan Software Version: 3.00(182)
Parameter List :
Instrument Cary 50
Instrument Version 3.00
Start (nm) 700.0
Stop (nm) 400.0
X Mode Nanometers
Y Mode Abs
UV-Vis Scan Rate (nm/min) 600.00
UV-Vis Data Interval (nm) 1.00
UV-Vis Ave. Time (sec) 0.1000
Beam Mode Dual Beam
Baseline Correction Off
Cycle Mode Off
Comments
Method Log :
Method Name : C:\Users\chemuser\Desktop\Pellock\heme spectra.MSW
Date/Time stamp: 10/11/2013 11:18:31 PM
Method Modifications:
Cell Changer 6x6 Changed: 10/11/2013 11:01:28 PM	Old:1	New:0
UVVIS SAT Changed: 10/11/2013 11:02:03 PM	Old:0.0125	New:0.1000
NIR SAT Changed: 10/11/2013 11:02:03 PM	Old:0.0125	New:0.1000
Common SAT Changed: 10/11/2013 11:02:03 PM	Old:0.0125	New:0.1000
UVVIS SAT Changed: 10/11/2013 11:02:19 PM	Old:0.1000	New:0.0125
NIR SAT Changed: 10/11/2013 11:02:19 PM	Old:0.1000	New:0.0125
Common SAT Changed: 10/11/2013 11:02:19 PM	Old:0.1000	New:0.0125
UVVIS SAT Changed: 10/11/2013 11:02:31 PM	Old:0.0125	New:0.5000
NIR SAT Changed: 10/11/2013 11:02:31 PM	Old:0.0125	New:0.5000
Common SAT Changed: 10/11/2013 11:02:31 PM	Old:0.0125	New:0.5000
UVVIS SAT Changed: 10/11/2013 11:02:38 PM	Old:0.5000	New:0.1000
NIR SAT Changed: 10/11/2013 11:02:38 PM	Old:0.5000	New:0.1000
Common SAT Changed: 10/11/2013 11:02:38 PM	Old:0.5000	New:0.1000
Temp Controller Changed: 10/11/2013 11:02:53 PM	Old:0	New:2
Sipper Type Changed: 10/11/2013 11:02:53 PM	Old:Internal RSA	New:External sipper
Saved as C:\Users\chemuser\Desktop\Pellock\heme spectra.MSW
Opened C:\Users\chemuser\Desktop\Pellock\heme spectra.MSW
End Method Modifications
<Current Wavelength>	401
15 8hrs ox #2
15 8hrs ox #2
Collection Time: 10/12/2013 11:27:31 PM
Operator Name :
Scan Software Version: 3.00(182)
Parameter List :
Instrument Cary 50
Instrument Version 3.00
Start (nm) 700.0
Stop (nm) 400.0
X Mode Nanometers
Y Mode Abs
UV-Vis Scan Rate (nm/min) 600.00
UV-Vis Data Interval (nm) 1.00
UV-Vis Ave. Time (sec) 0.1000
Beam Mode Dual Beam
Baseline Correction Off
Cycle Mode Off
Comments
Method Log :
Method Name : C:\Users\chemuser\Desktop\Pellock\heme spectra.MSW
Date/Time stamp: 10/11/2013 11:18:31 PM
Method Modifications:
Cell Changer 6x6 Changed: 10/11/2013 11:01:28 PM	Old:1	New:0
UVVIS SAT Changed: 10/11/2013 11:02:03 PM	Old:0.0125	New:0.1000
NIR SAT Changed: 10/11/2013 11:02:03 PM	Old:0.0125	New:0.1000
Common SAT Changed: 10/11/2013 11:02:03 PM	Old:0.0125	New:0.1000
UVVIS SAT Changed: 10/11/2013 11:02:19 PM	Old:0.1000	New:0.0125
NIR SAT Changed: 10/11/2013 11:02:19 PM	Old:0.1000	New:0.0125
Common SAT Changed: 10/11/2013 11:02:19 PM	Old:0.1000	New:0.0125
UVVIS SAT Changed: 10/11/2013 11:02:31 PM	Old:0.0125	New:0.5000
NIR SAT Changed: 10/11/2013 11:02:31 PM	Old:0.0125	New:0.5000
Common SAT Changed: 10/11/2013 11:02:31 PM	Old:0.0125	New:0.5000
UVVIS SAT Changed: 10/11/2013 11:02:38 PM	Old:0.5000	New:0.1000
NIR SAT Changed: 10/11/2013 11:02:38 PM	Old:0.5000	New:0.1000
Common SAT Changed: 10/11/2013 11:02:38 PM	Old:0.5000	New:0.1000
Temp Controller Changed: 10/11/2013 11:02:53 PM	Old:0	New:2
Sipper Type Changed: 10/11/2013 11:02:53 PM	Old:Internal RSA	New:External sipper
Saved as C:\Users\chemuser\Desktop\Pellock\heme spectra.MSW
Opened C:\Users\chemuser\Desktop\Pellock\heme spectra.MSW
End Method Modifications
<Current Wavelength>	401
15 8hrs red #2
15 8hrs red #2
Collection Time: 10/12/2013 11:29:42 PM
Operator Name :
Scan Software Version: 3.00(182)
Parameter List :
Instrument Cary 50
Instrument Version 3.00
Start (nm) 700.0
Stop (nm) 400.0
X Mode Nanometers
Y Mode Abs
UV-Vis Scan Rate (nm/min) 600.00
UV-Vis Data Interval (nm) 1.00
UV-Vis Ave. Time (sec) 0.1000
Beam Mode Dual Beam
Baseline Correction Off
Cycle Mode Off
Comments
Method Log :
Method Name : C:\Users\chemuser\Desktop\Pellock\heme spectra.MSW
Date/Time stamp: 10/11/2013 11:18:31 PM
Method Modifications:
Cell Changer 6x6 Changed: 10/11/2013 11:01:28 PM	Old:1	New:0
UVVIS SAT Changed: 10/11/2013 11:02:03 PM	Old:0.0125	New:0.1000
NIR SAT Changed: 10/11/2013 11:02:03 PM	Old:0.0125	New:0.1000
Common SAT Changed: 10/11/2013 11:02:03 PM	Old:0.0125	New:0.1000
UVVIS SAT Changed: 10/11/2013 11:02:19 PM	Old:0.1000	New:0.0125
NIR SAT Changed: 10/11/2013 11:02:19 PM	Old:0.1000	New:0.0125
Common SAT Changed: 10/11/2013 11:02:19 PM	Old:0.1000	New:0.0125
UVVIS SAT Changed: 10/11/2013 11:02:31 PM	Old:0.0125	New:0.5000
NIR SAT Changed: 10/11/2013 11:02:31 PM	Old:0.0125	New:0.5000
Common SAT Changed: 10/11/2013 11:02:31 PM	Old:0.0125	New:0.5000
UVVIS SAT Changed: 10/11/2013 11:02:38 PM	Old:0.5000	New:0.1000
NIR SAT Changed: 10/11/2013 11:02:38 PM	Old:0.5000	New:0.1000
Common SAT Changed: 10/11/2013 11:02:38 PM	Old:0.5000	New:0.1000
Temp Controller Changed: 10/11/2013 11:02:53 PM	Old:0	New:2
Sipper Type Changed: 10/11/2013 11:02:53 PM	Old:Internal RSA	New:External sipper
Saved as C:\Users\chemuser\Desktop\Pellock\heme spectra.MSW
Opened C:\Users\chemuser\Desktop\Pellock\heme spectra.MSW
End Method Modifications
<Current Wavelength>	401
15 8hrs ox #3
15 8hrs ox #3
Collection Time: 10/12/2013 11:31:34 PM
Operator Name :
Scan Software Version: 3.00(182)
Parameter List :
Instrument Cary 50
Instrument Version 3.00
Start (nm) 700.0
Stop (nm) 400.0
X Mode Nanometers
Y Mode Abs
UV-Vis Scan Rate (nm/min) 600.00
UV-Vis Data Interval (nm) 1.00
UV-Vis Ave. Time (sec) 0.1000
Beam Mode Dual Beam
Baseline Correction Off
Cycle Mode Off
Comments
Method Log :
Method Name : C:\Users\chemuser\Desktop\Pellock\heme spectra.MSW
Date/Time stamp: 10/11/2013 11:18:31 PM
Method Modifications:
Cell Changer 6x6 Changed: 10/11/2013 11:01:28 PM	Old:1	New:0
UVVIS SAT Changed: 10/11/2013 11:02:03 PM	Old:0.0125	New:0.1000
NIR SAT Changed: 10/11/2013 11:02:03 PM	Old:0.0125	New:0.1000
Common SAT Changed: 10/11/2013 11:02:03 PM	Old:0.0125	New:0.1000
UVVIS SAT Changed: 10/11/2013 11:02:19 PM	Old:0.1000	New:0.0125
NIR SAT Changed: 10/11/2013 11:02:19 PM	Old:0.1000	New:0.0125
Common SAT Changed: 10/11/2013 11:02:19 PM	Old:0.1000	New:0.0125
UVVIS SAT Changed: 10/11/2013 11:02:31 PM	Old:0.0125	New:0.5000
NIR SAT Changed: 10/11/2013 11:02:31 PM	Old:0.0125	New:0.5000
Common SAT Changed: 10/11/2013 11:02:31 PM	Old:0.0125	New:0.5000
UVVIS SAT Changed: 10/11/2013 11:02:38 PM	Old:0.5000	New:0.1000
NIR SAT Changed: 10/11/2013 11:02:38 PM	Old:0.5000	New:0.1000
Common SAT Changed: 10/11/2013 11:02:38 PM	Old:0.5000	New:0.1000
Temp Controller Changed: 10/11/2013 11:02:53 PM	Old:0	New:2
Sipper Type Changed: 10/11/2013 11:02:53 PM	Old:Internal RSA	New:External sipper
Saved as C:\Users\chemuser\Desktop\Pellock\heme spectra.MSW
Opened C:\Users\chemuser\Desktop\Pellock\heme spectra.MSW
End Method Modifications
<Current Wavelength>	401
15 8hrs red #3
15 8hrs red #3
Collection Time: 10/12/2013 11:33:08 PM
Operator Name :
Scan Software Version: 3.00(182)
Parameter List :
Instrument Cary 50
Instrument Version 3.00
Start (nm) 700.0
Stop (nm) 400.0
X Mode Nanometers
Y Mode Abs
UV-Vis Scan Rate (nm/min) 600.00
UV-Vis Data Interval (nm) 1.00
UV-Vis Ave. Time (sec) 0.1000
Beam Mode Dual Beam
Baseline Correction Off
Cycle Mode Off
Comments
Method Log :
Method Name : C:\Users\chemuser\Desktop\Pellock\heme spectra.MSW
Date/Time stamp: 10/11/2013 11:18:31 PM
Method Modifications:
Cell Changer 6x6 Changed: 10/11/2013 11:01:28 PM	Old:1	New:0
UVVIS SAT Changed: 10/11/2013 11:02:03 PM	Old:0.0125	New:0.1000
NIR SAT Changed: 10/11/2013 11:02:03 PM	Old:0.0125	New:0.1000
Common SAT Changed: 10/11/2013 11:02:03 PM	Old:0.0125	New:0.1000
UVVIS SAT Changed: 10/11/2013 11:02:19 PM	Old:0.1000	New:0.0125
NIR SAT Changed: 10/11/2013 11:02:19 PM	Old:0.1000	New:0.0125
Common SAT Changed: 10/11/2013 11:02:19 PM	Old:0.1000	New:0.0125
UVVIS SAT Changed: 10/11/2013 11:02:31 PM	Old:0.0125	New:0.5000
NIR SAT Changed: 10/11/2013 11:02:31 PM	Old:0.0125	New:0.5000
Common SAT Changed: 10/11/2013 11:02:31 PM	Old:0.0125	New:0.5000
UVVIS SAT Changed: 10/11/2013 11:02:38 PM	Old:0.5000	New:0.1000
NIR SAT Changed: 10/11/2013 11:02:38 PM	Old:0.5000	New:0.1000
Common SAT Changed: 10/11/2013 11:02:38 PM	Old:0.5000	New:0.1000
Temp Controller Changed: 10/11/2013 11:02:53 PM	Old:0	New:2
Sipper Type Changed: 10/11/2013 11:02:53 PM	Old:Internal RSA	New:External sipper
Saved as C:\Users\chemuser\Desktop\Pellock\heme spectra.MSW
Opened C:\Users\chemuser\Desktop\Pellock\heme spectra.MSW
End Method Modifications
<Current Wavelength>	401
mr1 4hrs ALA ox #1
mr1 4hrs ALA ox #1
Collection Time: 10/12/2013 11:36:50 PM
Operator Name :
Scan Software Version: 3.00(182)
Parameter List :
Instrument Cary 50
Instrument Version 3.00
Start (nm) 700.0
Stop (nm) 400.0
X Mode Nanometers
Y Mode Abs
UV-Vis Scan Rate (nm/min) 600.00
UV-Vis Data Interval (nm) 1.00
UV-Vis Ave. Time (sec) 0.1000
Beam Mode Dual Beam
Baseline Correction Off
Cycle Mode Off
Comments
Method Log :
Method Name : C:\Users\chemuser\Desktop\Pellock\heme spectra.MSW
Date/Time stamp: 10/11/2013 11:18:31 PM
Method Modifications:
Cell Changer 6x6 Changed: 10/11/2013 11:01:28 PM	Old:1	New:0
UVVIS SAT Changed: 10/11/2013 11:02:03 PM	Old:0.0125	New:0.1000
NIR SAT Changed: 10/11/2013 11:02:03 PM	Old:0.0125	New:0.1000
Common SAT Changed: 10/11/2013 11:02:03 PM	Old:0.0125	New:0.1000
UVVIS SAT Changed: 10/11/2013 11:02:19 PM	Old:0.1000	New:0.0125
NIR SAT Changed: 10/11/2013 11:02:19 PM	Old:0.1000	New:0.0125
Common SAT Changed: 10/11/2013 11:02:19 PM	Old:0.1000	New:0.0125
UVVIS SAT Changed: 10/11/2013 11:02:31 PM	Old:0.0125	New:0.5000
NIR SAT Changed: 10/11/2013 11:02:31 PM	Old:0.0125	New:0.5000
Common SAT Changed: 10/11/2013 11:02:31 PM	Old:0.0125	New:0.5000
UVVIS SAT Changed: 10/11/2013 11:02:38 PM	Old:0.5000	New:0.1000
NIR SAT Changed: 10/11/2013 11:02:38 PM	Old:0.5000	New:0.1000
Common SAT Changed: 10/11/2013 11:02:38 PM	Old:0.5000	New:0.1000
Temp Controller Changed: 10/11/2013 11:02:53 PM	Old:0	New:2
Sipper Type Changed: 10/11/2013 11:02:53 PM	Old:Internal RSA	New:External sipper
Saved as C:\Users\chemuser\Desktop\Pellock\heme spectra.MSW
Opened C:\Users\chemuser\Desktop\Pellock\heme spectra.MSW
End Method Modifications
<Current Wavelength>	401
mr1 4hrs ALA red #1
mr1 4hrs ALA red #1
Collection Time: 10/12/2013 11:38:16 PM
Operator Name :
Scan Software Version: 3.00(182)
Parameter List :
Instrument Cary 50
Instrument Version 3.00
Start (nm) 700.0
Stop (nm) 400.0
X Mode Nanometers
Y Mode Abs
UV-Vis Scan Rate (nm/min) 600.00
UV-Vis Data Interval (nm) 1.00
UV-Vis Ave. Time (sec) 0.1000
Beam Mode Dual Beam
Baseline Correction Off
Cycle Mode Off
Comments
Method Log :
Method Name : C:\Users\chemuser\Desktop\Pellock\heme spectra.MSW
Date/Time stamp: 10/11/2013 11:18:31 PM
Method Modifications:
Cell Changer 6x6 Changed: 10/11/2013 11:01:28 PM	Old:1	New:0
UVVIS SAT Changed: 10/11/2013 11:02:03 PM	Old:0.0125	New:0.1000
NIR SAT Changed: 10/11/2013 11:02:03 PM	Old:0.0125	New:0.1000
Common SAT Changed: 10/11/2013 11:02:03 PM	Old:0.0125	New:0.1000
UVVIS SAT Changed: 10/11/2013 11:02:19 PM	Old:0.1000	New:0.0125
NIR SAT Changed: 10/11/2013 11:02:19 PM	Old:0.1000	New:0.0125
Common SAT Changed: 10/11/2013 11:02:19 PM	Old:0.1000	New:0.0125
UVVIS SAT Changed: 10/11/2013 11:02:31 PM	Old:0.0125	New:0.5000
NIR SAT Changed: 10/11/2013 11:02:31 PM	Old:0.0125	New:0.5000
Common SAT Changed: 10/11/2013 11:02:31 PM	Old:0.0125	New:0.5000
UVVIS SAT Changed: 10/11/2013 11:02:38 PM	Old:0.5000	New:0.1000
NIR SAT Changed: 10/11/2013 11:02:38 PM	Old:0.5000	New:0.1000
Common SAT Changed: 10/11/2013 11:02:38 PM	Old:0.5000	New:0.1000
Temp Controller Changed: 10/11/2013 11:02:53 PM	Old:0	New:2
Sipper Type Changed: 10/11/2013 11:02:53 PM	Old:Internal RSA	New:External sipper
Saved as C:\Users\chemuser\Desktop\Pellock\heme spectra.MSW
Opened C:\Users\chemuser\Desktop\Pellock\heme spectra.MSW
End Method Modifications
<Current Wavelength>	401
mr1 4hrs ALA ox #2
mr1 4hrs ALA ox #2
Collection Time: 10/12/2013 11:38:37 PM
Operator Name :
Scan Software Version: 3.00(182)
Parameter List :
Instrument Cary 50
Instrument Version 3.00
Start (nm) 700.0
Stop (nm) 400.0
X Mode Nanometers
Y Mode Abs
UV-Vis Scan Rate (nm/min) 600.00
UV-Vis Data Interval (nm) 1.00
UV-Vis Ave. Time (sec) 0.1000
Beam Mode Dual Beam
Baseline Correction Off
Cycle Mode Off
Comments
Method Log :
Method Name : C:\Users\chemuser\Desktop\Pellock\heme spectra.MSW
Date/Time stamp: 10/11/2013 11:18:31 PM
Method Modifications:
Cell Changer 6x6 Changed: 10/11/2013 11:01:28 PM	Old:1	New:0
UVVIS SAT Changed: 10/11/2013 11:02:03 PM	Old:0.0125	New:0.1000
NIR SAT Changed: 10/11/2013 11:02:03 PM	Old:0.0125	New:0.1000
Common SAT Changed: 10/11/2013 11:02:03 PM	Old:0.0125	New:0.1000
UVVIS SAT Changed: 10/11/2013 11:02:19 PM	Old:0.1000	New:0.0125
NIR SAT Changed: 10/11/2013 11:02:19 PM	Old:0.1000	New:0.0125
Common SAT Changed: 10/11/2013 11:02:19 PM	Old:0.1000	New:0.0125
UVVIS SAT Changed: 10/11/2013 11:02:31 PM	Old:0.0125	New:0.5000
NIR SAT Changed: 10/11/2013 11:02:31 PM	Old:0.0125	New:0.5000
Common SAT Changed: 10/11/2013 11:02:31 PM	Old:0.0125	New:0.5000
UVVIS SAT Changed: 10/11/2013 11:02:38 PM	Old:0.5000	New:0.1000
NIR SAT Changed: 10/11/2013 11:02:38 PM	Old:0.5000	New:0.1000
Common SAT Changed: 10/11/2013 11:02:38 PM	Old:0.5000	New:0.1000
Temp Controller Changed: 10/11/2013 11:02:53 PM	Old:0	New:2
Sipper Type Changed: 10/11/2013 11:02:53 PM	Old:Internal RSA	New:External sipper
Saved as C:\Users\chemuser\Desktop\Pellock\heme spectra.MSW
Opened C:\Users\chemuser\Desktop\Pellock\heme spectra.MSW
End Method Modifications
<Current Wavelength>	401
mr1 4hrs ALA red #2
mr1 4hrs ALA red #2
Collection Time: 10/12/2013 11:40:11 PM
Operator Name :
Scan Software Version: 3.00(182)
Parameter List :
Instrument Cary 50
Instrument Version 3.00
Start (nm) 700.0
Stop (nm) 400.0
X Mode Nanometers
Y Mode Abs
UV-Vis Scan Rate (nm/min) 600.00
UV-Vis Data Interval (nm) 1.00
UV-Vis Ave. Time (sec) 0.1000
Beam Mode Dual Beam
Baseline Correction Off
Cycle Mode Off
Comments
Method Log :
Method Name : C:\Users\chemuser\Desktop\Pellock\heme spectra.MSW
Date/Time stamp: 10/11/2013 11:18:31 PM
Method Modifications:
Cell Changer 6x6 Changed: 10/11/2013 11:01:28 PM	Old:1	New:0
UVVIS SAT Changed: 10/11/2013 11:02:03 PM	Old:0.0125	New:0.1000
NIR SAT Changed: 10/11/2013 11:02:03 PM	Old:0.0125	New:0.1000
Common SAT Changed: 10/11/2013 11:02:03 PM	Old:0.0125	New:0.1000
UVVIS SAT Changed: 10/11/2013 11:02:19 PM	Old:0.1000	New:0.0125
NIR SAT Changed: 10/11/2013 11:02:19 PM	Old:0.1000	New:0.0125
Common SAT Changed: 10/11/2013 11:02:19 PM	Old:0.1000	New:0.0125
UVVIS SAT Changed: 10/11/2013 11:02:31 PM	Old:0.0125	New:0.5000
NIR SAT Changed: 10/11/2013 11:02:31 PM	Old:0.0125	New:0.5000
Common SAT Changed: 10/11/2013 11:02:31 PM	Old:0.0125	New:0.5000
UVVIS SAT Changed: 10/11/2013 11:02:38 PM	Old:0.5000	New:0.1000
NIR SAT Changed: 10/11/2013 11:02:38 PM	Old:0.5000	New:0.1000
Common SAT Changed: 10/11/2013 11:02:38 PM	Old:0.5000	New:0.1000
Temp Controller Changed: 10/11/2013 11:02:53 PM	Old:0	New:2
Sipper Type Changed: 10/11/2013 11:02:53 PM	Old:Internal RSA	New:External sipper
Saved as C:\Users\chemuser\Desktop\Pellock\heme spectra.MSW
Opened C:\Users\chemuser\Desktop\Pellock\heme spectra.MSW
End Method Modifications
<Current Wavelength>	401
mr1 4hrs ALA ox #3
mr1 4hrs ALA ox #3
Collection Time: 10/12/2013 11:41:36 PM
Operator Name :
Scan Software Version: 3.00(182)
Parameter List :
Instrument Cary 50
Instrument Version 3.00
Start (nm) 700.0
Stop (nm) 400.0
X Mode Nanometers
Y Mode Abs
UV-Vis Scan Rate (nm/min) 600.00
UV-Vis Data Interval (nm) 1.00
UV-Vis Ave. Time (sec) 0.1000
Beam Mode Dual Beam
Baseline Correction Off
Cycle Mode Off
Comments
Method Log :
Method Name : C:\Users\chemuser\Desktop\Pellock\heme spectra.MSW
Date/Time stamp: 10/11/2013 11:18:31 PM
Method Modifications:
Cell Changer 6x6 Changed: 10/11/2013 11:01:28 PM	Old:1	New:0
UVVIS SAT Changed: 10/11/2013 11:02:03 PM	Old:0.0125	New:0.1000
NIR SAT Changed: 10/11/2013 11:02:03 PM	Old:0.0125	New:0.1000
Common SAT Changed: 10/11/2013 11:02:03 PM	Old:0.0125	New:0.1000
UVVIS SAT Changed: 10/11/2013 11:02:19 PM	Old:0.1000	New:0.0125
NIR SAT Changed: 10/11/2013 11:02:19 PM	Old:0.1000	New:0.0125
Common SAT Changed: 10/11/2013 11:02:19 PM	Old:0.1000	New:0.0125
UVVIS SAT Changed: 10/11/2013 11:02:31 PM	Old:0.0125	New:0.5000
NIR SAT Changed: 10/11/2013 11:02:31 PM	Old:0.0125	New:0.5000
Common SAT Changed: 10/11/2013 11:02:31 PM	Old:0.0125	New:0.5000
UVVIS SAT Changed: 10/11/2013 11:02:38 PM	Old:0.5000	New:0.1000
NIR SAT Changed: 10/11/2013 11:02:38 PM	Old:0.5000	New:0.1000
Common SAT Changed: 10/11/2013 11:02:38 PM	Old:0.5000	New:0.1000
Temp Controller Changed: 10/11/2013 11:02:53 PM	Old:0	New:2
Sipper Type Changed: 10/11/2013 11:02:53 PM	Old:Internal RSA	New:External sipper
Saved as C:\Users\chemuser\Desktop\Pellock\heme spectra.MSW
Opened C:\Users\chemuser\Desktop\Pellock\heme spectra.MSW
End Method Modifications
<Current Wavelength>	401
mr1 4hrs ALA red #3
mr1 4hrs ALA red #3
Collection Time: 10/12/2013 11:43:08 PM
Operator Name :
Scan Software Version: 3.00(182)
Parameter List :
Instrument Cary 50
Instrument Version 3.00
Start (nm) 700.0
Stop (nm) 400.0
X Mode Nanometers
Y Mode Abs
UV-Vis Scan Rate (nm/min) 600.00
UV-Vis Data Interval (nm) 1.00
UV-Vis Ave. Time (sec) 0.1000
Beam Mode Dual Beam
Baseline Correction Off
Cycle Mode Off
Comments
Method Log :
Method Name : C:\Users\chemuser\Desktop\Pellock\heme spectra.MSW
Date/Time stamp: 10/11/2013 11:18:31 PM
Method Modifications:
Cell Changer 6x6 Changed: 10/11/2013 11:01:28 PM	Old:1	New:0
UVVIS SAT Changed: 10/11/2013 11:02:03 PM	Old:0.0125	New:0.1000
NIR SAT Changed: 10/11/2013 11:02:03 PM	Old:0.0125	New:0.1000
Common SAT Changed: 10/11/2013 11:02:03 PM	Old:0.0125	New:0.1000
UVVIS SAT Changed: 10/11/2013 11:02:19 PM	Old:0.1000	New:0.0125
NIR SAT Changed: 10/11/2013 11:02:19 PM	Old:0.1000	New:0.0125
Common SAT Changed: 10/11/2013 11:02:19 PM	Old:0.1000	New:0.0125
UVVIS SAT Changed: 10/11/2013 11:02:31 PM	Old:0.0125	New:0.5000
NIR SAT Changed: 10/11/2013 11:02:31 PM	Old:0.0125	New:0.5000
Common SAT Changed: 10/11/2013 11:02:31 PM	Old:0.0125	New:0.5000
UVVIS SAT Changed: 10/11/2013 11:02:38 PM	Old:0.5000	New:0.1000
NIR SAT Changed: 10/11/2013 11:02:38 PM	Old:0.5000	New:0.1000
Common SAT Changed: 10/11/2013 11:02:38 PM	Old:0.5000	New:0.1000
Temp Controller Changed: 10/11/2013 11:02:53 PM	Old:0	New:2
Sipper Type Changed: 10/11/2013 11:02:53 PM	Old:Internal RSA	New:External sipper
Saved as C:\Users\chemuser\Desktop\Pellock\heme spectra.MSW
Opened C:\Users\chemuser\Desktop\Pellock\heme spectra.MSW
End Method Modifications
<Current Wavelength>	401
15 4hrs ALA ox #1
15 4hrs ALA ox #1
Collection Time: 10/12/2013 11:47:26 PM
Operator Name :
Scan Software Version: 3.00(182)
Parameter List :
Instrument Cary 50
Instrument Version 3.00
Start (nm) 700.0
Stop (nm) 400.0
X Mode Nanometers
Y Mode Abs
UV-Vis Scan Rate (nm/min) 600.00
UV-Vis Data Interval (nm) 1.00
UV-Vis Ave. Time (sec) 0.1000
Beam Mode Dual Beam
Baseline Correction Off
Cycle Mode Off
Comments
Method Log :
Method Name : C:\Users\chemuser\Desktop\Pellock\heme spectra.MSW
Date/Time stamp: 10/11/2013 11:18:31 PM
Method Modifications:
Cell Changer 6x6 Changed: 10/11/2013 11:01:28 PM	Old:1	New:0
UVVIS SAT Changed: 10/11/2013 11:02:03 PM	Old:0.0125	New:0.1000
NIR SAT Changed: 10/11/2013 11:02:03 PM	Old:0.0125	New:0.1000
Common SAT Changed: 10/11/2013 11:02:03 PM	Old:0.0125	New:0.1000
UVVIS SAT Changed: 10/11/2013 11:02:19 PM	Old:0.1000	New:0.0125
NIR SAT Changed: 10/11/2013 11:02:19 PM	Old:0.1000	New:0.0125
Common SAT Changed: 10/11/2013 11:02:19 PM	Old:0.1000	New:0.0125
UVVIS SAT Changed: 10/11/2013 11:02:31 PM	Old:0.0125	New:0.5000
NIR SAT Changed: 10/11/2013 11:02:31 PM	Old:0.0125	New:0.5000
Common SAT Changed: 10/11/2013 11:02:31 PM	Old:0.0125	New:0.5000
UVVIS SAT Changed: 10/11/2013 11:02:38 PM	Old:0.5000	New:0.1000
NIR SAT Changed: 10/11/2013 11:02:38 PM	Old:0.5000	New:0.1000
Common SAT Changed: 10/11/2013 11:02:38 PM	Old:0.5000	New:0.1000
Temp Controller Changed: 10/11/2013 11:02:53 PM	Old:0	New:2
Sipper Type Changed: 10/11/2013 11:02:53 PM	Old:Internal RSA	New:External sipper
Saved as C:\Users\chemuser\Desktop\Pellock\heme spectra.MSW
Opened C:\Users\chemuser\Desktop\Pellock\heme spectra.MSW
End Method Modifications
<Current Wavelength>	401
15 4hrs ALA red #1
15 4hrs ALA red #1
Collection Time: 10/12/2013 11:48:55 PM
Operator Name :
Scan Software Version: 3.00(182)
Parameter List :
Instrument Cary 50
Instrument Version 3.00
Start (nm) 700.0
Stop (nm) 400.0
X Mode Nanometers
Y Mode Abs
UV-Vis Scan Rate (nm/min) 600.00
UV-Vis Data Interval (nm) 1.00
UV-Vis Ave. Time (sec) 0.1000
Beam Mode Dual Beam
Baseline Correction Off
Cycle Mode Off
Comments
Method Log :
Method Name : C:\Users\chemuser\Desktop\Pellock\heme spectra.MSW
Date/Time stamp: 10/11/2013 11:18:31 PM
Method Modifications:
Cell Changer 6x6 Changed: 10/11/2013 11:01:28 PM	Old:1	New:0
UVVIS SAT Changed: 10/11/2013 11:02:03 PM	Old:0.0125	New:0.1000
NIR SAT Changed: 10/11/2013 11:02:03 PM	Old:0.0125	New:0.1000
Common SAT Changed: 10/11/2013 11:02:03 PM	Old:0.0125	New:0.1000
UVVIS SAT Changed: 10/11/2013 11:02:19 PM	Old:0.1000	New:0.0125
NIR SAT Changed: 10/11/2013 11:02:19 PM	Old:0.1000	New:0.0125
Common SAT Changed: 10/11/2013 11:02:19 PM	Old:0.1000	New:0.0125
UVVIS SAT Changed: 10/11/2013 11:02:31 PM	Old:0.0125	New:0.5000
NIR SAT Changed: 10/11/2013 11:02:31 PM	Old:0.0125	New:0.5000
Common SAT Changed: 10/11/2013 11:02:31 PM	Old:0.0125	New:0.5000
UVVIS SAT Changed: 10/11/2013 11:02:38 PM	Old:0.5000	New:0.1000
NIR SAT Changed: 10/11/2013 11:02:38 PM	Old:0.5000	New:0.1000
Common SAT Changed: 10/11/2013 11:02:38 PM	Old:0.5000	New:0.1000
Temp Controller Changed: 10/11/2013 11:02:53 PM	Old:0	New:2
Sipper Type Changed: 10/11/2013 11:02:53 PM	Old:Internal RSA	New:External sipper
Saved as C:\Users\chemuser\Desktop\Pellock\heme spectra.MSW
Opened C:\Users\chemuser\Desktop\Pellock\heme spectra.MSW
End Method Modifications
<Current Wavelength>	401
15 4hrs ALA ox #2
15 4hrs ALA ox #2
Collection Time: 10/12/2013 11:50:22 PM
Operator Name :
Scan Software Version: 3.00(182)
Parameter List :
Instrument Cary 50
Instrument Version 3.00
Start (nm) 700.0
Stop (nm) 400.0
X Mode Nanometers
Y Mode Abs
UV-Vis Scan Rate (nm/min) 600.00
UV-Vis Data Interval (nm) 1.00
UV-Vis Ave. Time (sec) 0.1000
Beam Mode Dual Beam
Baseline Correction Off
Cycle Mode Off
Comments
Method Log :
Method Name : C:\Users\chemuser\Desktop\Pellock\heme spectra.MSW
Date/Time stamp: 10/11/2013 11:18:31 PM
Method Modifications:
Cell Changer 6x6 Changed: 10/11/2013 11:01:28 PM	Old:1	New:0
UVVIS SAT Changed: 10/11/2013 11:02:03 PM	Old:0.0125	New:0.1000
NIR SAT Changed: 10/11/2013 11:02:03 PM	Old:0.0125	New:0.1000
Common SAT Changed: 10/11/2013 11:02:03 PM	Old:0.0125	New:0.1000
UVVIS SAT Changed: 10/11/2013 11:02:19 PM	Old:0.1000	New:0.0125
NIR SAT Changed: 10/11/2013 11:02:19 PM	Old:0.1000	New:0.0125
Common SAT Changed: 10/11/2013 11:02:19 PM	Old:0.1000	New:0.0125
UVVIS SAT Changed: 10/11/2013 11:02:31 PM	Old:0.0125	New:0.5000
NIR SAT Changed: 10/11/2013 11:02:31 PM	Old:0.0125	New:0.5000
Common SAT Changed: 10/11/2013 11:02:31 PM	Old:0.0125	New:0.5000
UVVIS SAT Changed: 10/11/2013 11:02:38 PM	Old:0.5000	New:0.1000
NIR SAT Changed: 10/11/2013 11:02:38 PM	Old:0.5000	New:0.1000
Common SAT Changed: 10/11/2013 11:02:38 PM	Old:0.5000	New:0.1000
Temp Controller Changed: 10/11/2013 11:02:53 PM	Old:0	New:2
Sipper Type Changed: 10/11/2013 11:02:53 PM	Old:Internal RSA	New:External sipper
Saved as C:\Users\chemuser\Desktop\Pellock\heme spectra.MSW
Opened C:\Users\chemuser\Desktop\Pellock\heme spectra.MSW
End Method Modifications
<Current Wavelength>	401
15 4hrs ALA red #2
15 4hrs ALA red #2
Collection Time: 10/12/2013 11:51:48 PM
Operator Name :
Scan Software Version: 3.00(182)
Parameter List :
Instrument Cary 50
Instrument Version 3.00
Start (nm) 700.0
Stop (nm) 400.0
X Mode Nanometers
Y Mode Abs
UV-Vis Scan Rate (nm/min) 600.00
UV-Vis Data Interval (nm) 1.00
UV-Vis Ave. Time (sec) 0.1000
Beam Mode Dual Beam
Baseline Correction Off
Cycle Mode Off
Comments
Method Log :
Method Name : C:\Users\chemuser\Desktop\Pellock\heme spectra.MSW
Date/Time stamp: 10/11/2013 11:18:31 PM
Method Modifications:
Cell Changer 6x6 Changed: 10/11/2013 11:01:28 PM	Old:1	New:0
UVVIS SAT Changed: 10/11/2013 11:02:03 PM	Old:0.0125	New:0.1000
NIR SAT Changed: 10/11/2013 11:02:03 PM	Old:0.0125	New:0.1000
Common SAT Changed: 10/11/2013 11:02:03 PM	Old:0.0125	New:0.1000
UVVIS SAT Changed: 10/11/2013 11:02:19 PM	Old:0.1000	New:0.0125
NIR SAT Changed: 10/11/2013 11:02:19 PM	Old:0.1000	New:0.0125
Common SAT Changed: 10/11/2013 11:02:19 PM	Old:0.1000	New:0.0125
UVVIS SAT Changed: 10/11/2013 11:02:31 PM	Old:0.0125	New:0.5000
NIR SAT Changed: 10/11/2013 11:02:31 PM	Old:0.0125	New:0.5000
Common SAT Changed: 10/11/2013 11:02:31 PM	Old:0.0125	New:0.5000
UVVIS SAT Changed: 10/11/2013 11:02:38 PM	Old:0.5000	New:0.1000
NIR SAT Changed: 10/11/2013 11:02:38 PM	Old:0.5000	New:0.1000
Common SAT Changed: 10/11/2013 11:02:38 PM	Old:0.5000	New:0.1000
Temp Controller Changed: 10/11/2013 11:02:53 PM	Old:0	New:2
Sipper Type Changed: 10/11/2013 11:02:53 PM	Old:Internal RSA	New:External sipper
Saved as C:\Users\chemuser\Desktop\Pellock\heme spectra.MSW
Opened C:\Users\chemuser\Desktop\Pellock\heme spectra.MSW
End Method Modifications
<Current Wavelength>	401
15 4hrs ALA ox #3
15 4hrs ALA ox #3
Collection Time: 10/12/2013 11:53:16 PM
Operator Name :
Scan Software Version: 3.00(182)
Parameter List :
Instrument Cary 50
Instrument Version 3.00
Start (nm) 700.0
Stop (nm) 400.0
X Mode Nanometers
Y Mode Abs
UV-Vis Scan Rate (nm/min) 600.00
UV-Vis Data Interval (nm) 1.00
UV-Vis Ave. Time (sec) 0.1000
Beam Mode Dual Beam
Baseline Correction Off
Cycle Mode Off
Comments
Method Log :
Method Name : C:\Users\chemuser\Desktop\Pellock\heme spectra.MSW
Date/Time stamp: 10/11/2013 11:18:31 PM
Method Modifications:
Cell Changer 6x6 Changed: 10/11/2013 11:01:28 PM	Old:1	New:0
UVVIS SAT Changed: 10/11/2013 11:02:03 PM	Old:0.0125	New:0.1000
NIR SAT Changed: 10/11/2013 11:02:03 PM	Old:0.0125	New:0.1000
Common SAT Changed: 10/11/2013 11:02:03 PM	Old:0.0125	New:0.1000
UVVIS SAT Changed: 10/11/2013 11:02:19 PM	Old:0.1000	New:0.0125
NIR SAT Changed: 10/11/2013 11:02:19 PM	Old:0.1000	New:0.0125
Common SAT Changed: 10/11/2013 11:02:19 PM	Old:0.1000	New:0.0125
UVVIS SAT Changed: 10/11/2013 11:02:31 PM	Old:0.0125	New:0.5000
NIR SAT Changed: 10/11/2013 11:02:31 PM	Old:0.0125	New:0.5000
Common SAT Changed: 10/11/2013 11:02:31 PM	Old:0.0125	New:0.5000
UVVIS SAT Changed: 10/11/2013 11:02:38 PM	Old:0.5000	New:0.1000
NIR SAT Changed: 10/11/2013 11:02:38 PM	Old:0.5000	New:0.1000
Common SAT Changed: 10/11/2013 11:02:38 PM	Old:0.5000	New:0.1000
Temp Controller Changed: 10/11/2013 11:02:53 PM	Old:0	New:2
Sipper Type Changed: 10/11/2013 11:02:53 PM	Old:Internal RSA	New:External sipper
Saved as C:\Users\chemuser\Desktop\Pellock\heme spectra.MSW
Opened C:\Users\chemuser\Desktop\Pellock\heme spectra.MSW
End Method Modifications
<Current Wavelength>	401
15 4hrs ALA red #3
15 4hrs ALA red #3
Collection Time: 10/12/2013 11:55:06 PM
Operator Name :
Scan Software Version: 3.00(182)
Parameter List :
Instrument Cary 50
Instrument Version 3.00
Start (nm) 700.0
Stop (nm) 400.0
X Mode Nanometers
Y Mode Abs
UV-Vis Scan Rate (nm/min) 600.00
UV-Vis Data Interval (nm) 1.00
UV-Vis Ave. Time (sec) 0.1000
Beam Mode Dual Beam
Baseline Correction Off
Cycle Mode Off
Comments
Method Log :
Method Name : C:\Users\chemuser\Desktop\Pellock\heme spectra.MSW
Date/Time stamp: 10/11/2013 11:18:31 PM
Method Modifications:
Cell Changer 6x6 Changed: 10/11/2013 11:01:28 PM	Old:1	New:0
UVVIS SAT Changed: 10/11/2013 11:02:03 PM	Old:0.0125	New:0.1000
NIR SAT Changed: 10/11/2013 11:02:03 PM	Old:0.0125	New:0.1000
Common SAT Changed: 10/11/2013 11:02:03 PM	Old:0.0125	New:0.1000
UVVIS SAT Changed: 10/11/2013 11:02:19 PM	Old:0.1000	New:0.0125
NIR SAT Changed: 10/11/2013 11:02:19 PM	Old:0.1000	New:0.0125
Common SAT Changed: 10/11/2013 11:02:19 PM	Old:0.1000	New:0.0125
UVVIS SAT Changed: 10/11/2013 11:02:31 PM	Old:0.0125	New:0.5000
NIR SAT Changed: 10/11/2013 11:02:31 PM	Old:0.0125	New:0.5000
Common SAT Changed: 10/11/2013 11:02:31 PM	Old:0.0125	New:0.5000
UVVIS SAT Changed: 10/11/2013 11:02:38 PM	Old:0.5000	New:0.1000
NIR SAT Changed: 10/11/2013 11:02:38 PM	Old:0.5000	New:0.1000
Common SAT Changed: 10/11/2013 11:02:38 PM	Old:0.5000	New:0.1000
Temp Controller Changed: 10/11/2013 11:02:53 PM	Old:0	New:2
Sipper Type Changed: 10/11/2013 11:02:53 PM	Old:Internal RSA	New:External sipper
Saved as C:\Users\chemuser\Desktop\Pellock\heme spectra.MSW
Opened C:\Users\chemuser\Desktop\Pellock\heme spectra.MSW
End Method Modifications
<Current Wavelength>	401
mr1 8hrs ALA ox #1
mr1 8hrs ALA ox #1
Collection Time: 10/13/2013 12:00:13 AM
Operator Name :
Scan Software Version: 3.00(182)
Parameter List :
Instrument Cary 50
Instrument Version 3.00
Start (nm) 700.0
Stop (nm) 400.0
X Mode Nanometers
Y Mode Abs
UV-Vis Scan Rate (nm/min) 600.00
UV-Vis Data Interval (nm) 1.00
UV-Vis Ave. Time (sec) 0.1000
Beam Mode Dual Beam
Baseline Correction Off
Cycle Mode Off
Comments
Method Log :
Method Name : C:\Users\chemuser\Desktop\Pellock\heme spectra.MSW
Date/Time stamp: 10/11/2013 11:18:31 PM
Method Modifications:
Cell Changer 6x6 Changed: 10/11/2013 11:01:28 PM	Old:1	New:0
UVVIS SAT Changed: 10/11/2013 11:02:03 PM	Old:0.0125	New:0.1000
NIR SAT Changed: 10/11/2013 11:02:03 PM	Old:0.0125	New:0.1000
Common SAT Changed: 10/11/2013 11:02:03 PM	Old:0.0125	New:0.1000
UVVIS SAT Changed: 10/11/2013 11:02:19 PM	Old:0.1000	New:0.0125
NIR SAT Changed: 10/11/2013 11:02:19 PM	Old:0.1000	New:0.0125
Common SAT Changed: 10/11/2013 11:02:19 PM	Old:0.1000	New:0.0125
UVVIS SAT Changed: 10/11/2013 11:02:31 PM	Old:0.0125	New:0.5000
NIR SAT Changed: 10/11/2013 11:02:31 PM	Old:0.0125	New:0.5000
Common SAT Changed: 10/11/2013 11:02:31 PM	Old:0.0125	New:0.5000
UVVIS SAT Changed: 10/11/2013 11:02:38 PM	Old:0.5000	New:0.1000
NIR SAT Changed: 10/11/2013 11:02:38 PM	Old:0.5000	New:0.1000
Common SAT Changed: 10/11/2013 11:02:38 PM	Old:0.5000	New:0.1000
Temp Controller Changed: 10/11/2013 11:02:53 PM	Old:0	New:2
Sipper Type Changed: 10/11/2013 11:02:53 PM	Old:Internal RSA	New:External sipper
Saved as C:\Users\chemuser\Desktop\Pellock\heme spectra.MSW
Opened C:\Users\chemuser\Desktop\Pellock\heme spectra.MSW
End Method Modifications
<Current Wavelength>	401
mr1 8hrs ALA red #1
mr1 8hrs ALA red #1
Collection Time: 10/13/2013 12:01:37 AM
Operator Name :
Scan Software Version: 3.00(182)
Parameter List :
Instrument Cary 50
Instrument Version 3.00
Start (nm) 700.0
Stop (nm) 400.0
X Mode Nanometers
Y Mode Abs
UV-Vis Scan Rate (nm/min) 600.00
UV-Vis Data Interval (nm) 1.00
UV-Vis Ave. Time (sec) 0.1000
Beam Mode Dual Beam
Baseline Correction Off
Cycle Mode Off
Comments
Method Log :
Method Name : C:\Users\chemuser\Desktop\Pellock\heme spectra.MSW
Date/Time stamp: 10/11/2013 11:18:31 PM
Method Modifications:
Cell Changer 6x6 Changed: 10/11/2013 11:01:28 PM	Old:1	New:0
UVVIS SAT Changed: 10/11/2013 11:02:03 PM	Old:0.0125	New:0.1000
NIR SAT Changed: 10/11/2013 11:02:03 PM	Old:0.0125	New:0.1000
Common SAT Changed: 10/11/2013 11:02:03 PM	Old:0.0125	New:0.1000
UVVIS SAT Changed: 10/11/2013 11:02:19 PM	Old:0.1000	New:0.0125
NIR SAT Changed: 10/11/2013 11:02:19 PM	Old:0.1000	New:0.0125
Common SAT Changed: 10/11/2013 11:02:19 PM	Old:0.1000	New:0.0125
UVVIS SAT Changed: 10/11/2013 11:02:31 PM	Old:0.0125	New:0.5000
NIR SAT Changed: 10/11/2013 11:02:31 PM	Old:0.0125	New:0.5000
Common SAT Changed: 10/11/2013 11:02:31 PM	Old:0.0125	New:0.5000
UVVIS SAT Changed: 10/11/2013 11:02:38 PM	Old:0.5000	New:0.1000
NIR SAT Changed: 10/11/2013 11:02:38 PM	Old:0.5000	New:0.1000
Common SAT Changed: 10/11/2013 11:02:38 PM	Old:0.5000	New:0.1000
Temp Controller Changed: 10/11/2013 11:02:53 PM	Old:0	New:2
Sipper Type Changed: 10/11/2013 11:02:53 PM	Old:Internal RSA	New:External sipper
Saved as C:\Users\chemuser\Desktop\Pellock\heme spectra.MSW
Opened C:\Users\chemuser\Desktop\Pellock\heme spectra.MSW
End Method Modifications
<Current Wavelength>	401
mr1 8hrs ALA ox #2
mr1 8hrs ALA ox #2
Collection Time: 10/13/2013 12:03:09 AM
Operator Name :
Scan Software Version: 3.00(182)
Parameter List :
Instrument Cary 50
Instrument Version 3.00
Start (nm) 700.0
Stop (nm) 400.0
X Mode Nanometers
Y Mode Abs
UV-Vis Scan Rate (nm/min) 600.00
UV-Vis Data Interval (nm) 1.00
UV-Vis Ave. Time (sec) 0.1000
Beam Mode Dual Beam
Baseline Correction Off
Cycle Mode Off
Comments
Method Log :
Method Name : C:\Users\chemuser\Desktop\Pellock\heme spectra.MSW
Date/Time stamp: 10/11/2013 11:18:31 PM
Method Modifications:
Cell Changer 6x6 Changed: 10/11/2013 11:01:28 PM	Old:1	New:0
UVVIS SAT Changed: 10/11/2013 11:02:03 PM	Old:0.0125	New:0.1000
NIR SAT Changed: 10/11/2013 11:02:03 PM	Old:0.0125	New:0.1000
Common SAT Changed: 10/11/2013 11:02:03 PM	Old:0.0125	New:0.1000
UVVIS SAT Changed: 10/11/2013 11:02:19 PM	Old:0.1000	New:0.0125
NIR SAT Changed: 10/11/2013 11:02:19 PM	Old:0.1000	New:0.0125
Common SAT Changed: 10/11/2013 11:02:19 PM	Old:0.1000	New:0.0125
UVVIS SAT Changed: 10/11/2013 11:02:31 PM	Old:0.0125	New:0.5000
NIR SAT Changed: 10/11/2013 11:02:31 PM	Old:0.0125	New:0.5000
Common SAT Changed: 10/11/2013 11:02:31 PM	Old:0.0125	New:0.5000
UVVIS SAT Changed: 10/11/2013 11:02:38 PM	Old:0.5000	New:0.1000
NIR SAT Changed: 10/11/2013 11:02:38 PM	Old:0.5000	New:0.1000
Common SAT Changed: 10/11/2013 11:02:38 PM	Old:0.5000	New:0.1000
Temp Controller Changed: 10/11/2013 11:02:53 PM	Old:0	New:2
Sipper Type Changed: 10/11/2013 11:02:53 PM	Old:Internal RSA	New:External sipper
Saved as C:\Users\chemuser\Desktop\Pellock\heme spectra.MSW
Opened C:\Users\chemuser\Desktop\Pellock\heme spectra.MSW
End Method Modifications
<Current Wavelength>	401
mr1 8hrs ALA red #2
mr1 8hrs ALA red #2
Collection Time: 10/13/2013 12:04:37 AM
Operator Name :
Scan Software Version: 3.00(182)
Parameter List :
Instrument Cary 50
Instrument Version 3.00
Start (nm) 700.0
[truncated: 369 more rows]
[truncated: 48 more columns]

## Sheet: Fig. 4B processed
											Comparison	T-test P value
		550-535	[heme]µM								MR1/ev 4hr vs. 15/ev 4hr	0.00220121	**
	mr1 4hrs #1	0.0933519	3.89453								MR1/ev 4hr vs. MR1/phemA 4hr	0.205079
	mr1 4hrs #2	0.115813	4.83159								MR1/ev 4hr vs. 15/phemA 4hr	0.570143
	mr1 4hrs #3	0.126311	5.26953				[heme]µM	stdev			15/ev 4hr vs. MR1/phemA 4hr	0.00396879	**
	mr1 4hrs mean	0.111825	4.66522			MR1/ev 4hr	4.66522	0.702434			15/ev 4hr vs. 15/phemA 4hr	0.00161931	**
	stdev		0.702434			15/ev 4hr	1.59039	0.294476			MR1/phemA 4hr vs. 15/phemA 4hr	0.0981934
						mr1/ev ALA 4hrs	3.8639	0.59095
	15 4hrs #1	0.0301156	1.25639			15/ev ALA 4hrs	5.02579	0.726971			MR1/ev 8hr vs. 15/ev 8hr	0.730117
	15 4hrs #2	0.0434482	1.81261								MR1/ev 8hr vs. MR1/phemA 8hr	0.238508
	15 4hrs #3	0.040801	1.70217			MR1/ev 8hr	3.76787	0.0861259			MR1/ev 8hr vs. 15/phemA 8hr	0.047857	*
	15 4hrs mean	0.0381216	1.59039			15/ev 8hr	3.9175	0.695031			15/ev 8hr vs. MR1/phemA 8hr	0.34638
	stdev		0.294476			mr1/ev ALA 8hrs	3.41219	0.436645			15/ev 8hr vs. 15/phemA 8hr	0.18418
						15/ev ALA 8hrs	4.77505	0.612717			MR1/phemA 8hr vs. 15/phemA 8hr	0.0349346	*
	mr1 4hrs ALA #1	0.107978	4.50472
	mr1 4hrs ALA #2	0.08007	3.34042
	mr1 4hrs ALA #3	0.0898053	3.74657
	mr1 4hrs ALA mean	0.0926178	3.8639
	stdev		0.59095
	15 4hrs ALA #1	0.100593	4.19663
	15 4hrs ALA #2	0.127688	5.32698
	15 4hrs ALA #3	0.133124	5.55376
	15 4hrs ALA mean	0.120468	5.02579
	stdev		0.726971
	mr1 8hrs #1	0.0881439	3.67726
	mr1 8hrs #2	0.0905514	3.7777
	mr1 8hrs #3	0.0922525	3.84867
	mr1 8hrs mean	0.0903159	3.76787
	stdev		0.0861259
	15 8hrs #1	0.0748091	3.12095
	15 8hrs #2	0.101415	4.23092
	15 8hrs #3	0.105483	4.40062
	15 8hrs mean	0.0939024	3.9175
	stdev		0.695031
	mr1 8hrs ALA #1	0.0910355	3.79789
	mr1 8hrs ALA #2	0.0704267	2.93812
	mr1 8hrs ALA #3	0.0839085	3.50056
	mr1 8hrs ALA mean	0.0817902	3.41219
	stdev		0.436645
	15 8hrs ALA #1	0.0990482	4.13217
	15 8hrs ALA #2	0.11603	4.84065
	15 8hrs ALA #3	0.128295	5.35233
	15 8hrs ALA mean	0.114458	4.77505
	stdev		0.612717

## Sheet: Fig. 4C
	0	1	2	3	4	5	6	7	8	9	10	11	12	13	14	15	16	17	18
MR1/pBBAD-SP #1 LB Km 0.005% arabinose	0.075	0.189	0.453	1.41	2.65	4.08	4.79	5.85	6.24	6.69	6.34	6.6	7.07	6.69	7.13	7.44	6.44	6.18	5.11
MR1/pBBAD-SP #2 LB Km 0.005% arabinose	0.076	0.208	0.49	1.46	2.92	4.21	4.96	5.76	6.23	6.33	6.89	6.92	7.16	6.56	6.66	6.03	5.09	4.91	4.14
MR1/pBBAD-SP #3 LB Km 0.005% arabinose	0.082	0.204	0.472	1.44	3.07	4.3	4.76	5.52	5.85	6.22	6.44	6.9	6.93	7.27	6.45	6.32	5.87	5.08	4.68
MR1/pBBAD-SP LB Km	0.0776667	0.200333	0.471667	1.43667	2.88	4.19667	4.83667	5.71	6.10667	6.41333	6.55667	6.80667	7.05333	6.84	6.74667	6.59667	5.8	5.39	4.64333
STD ERR of MEAN	0.00218581	0.00578312	0.0106823	0.0145297	0.122882	0.0638575	0.0622718	0.0984886	0.128366	0.141931	0.169148	0.103494	0.0669162	0.218251	0.201025	0.429897	0.39128	0.398037	0.280614
STD DEV	0.00378594	0.0100167	0.0185023	0.0251661	0.212838	0.110604	0.107858	0.170587	0.222336	0.245832	0.292973	0.179258	0.115902	0.378021	0.348186	0.744603	0.677717	0.68942	0.486038
99% CI	0.00563028	0.0148963	0.0275157	0.0374259	0.316523	0.164486	0.160402	0.25369	0.330648	0.36559	0.435697	0.266584	0.172365	0.562176	0.517806	1.10734	1.00787	1.02527	0.722815
hfqdelta #15/pBBAD-SP #1 LB Km 0.005% arabinose	0.07	0.144	0.293	0.515	1.35	2.39	3.27	4.24	4.65	4.83	4.93	5.06	5.11	5.23	5.6	5.5	5.18	4.3	2.21
hfqdelta #15/pBBAD-SP #2 LB Km 0.005% arabinose	0.075	0.166	0.325	0.564	1.48	2.56	3.26	4.28	4.52	4.75	4.59	5.01	5.08	5.3	5.64	5.24	5.41	4.86	3.9
hfqdelta #15/pBBAD-SP #3 LB Km 0.005% arabinose	0.072	0.16	0.319	0.574	1.4	2.32	3.1	3.97	4.54	4.68	4.45	4.76	4.95	5.3	5.71	5.31	5.4	5.82	4.97
hfqdelta #15/pBBAD-SP LB Km	0.0723333	0.156667	0.312333	0.551	1.41	2.42333	3.21	4.16333	4.57	4.75333	4.65667	4.94333	5.04667	5.27667	5.65	5.35	5.33	4.99333	3.69333
STD ERR of MEAN	0.00145297	0.00656591	0.00982061	0.01823	0.0378594	0.0712585	0.0550757	0.0973539	0.0404145	0.0433333	0.142517	0.0927961	0.0491031	0.0233333	0.0321455	0.0776745	0.0750555	0.443822	0.803416
STD DEV	0.00251661	0.0113725	0.0170098	0.0315753	0.0655744	0.123423	0.0953939	0.168622	0.07	0.0750555	0.246847	0.160728	0.085049	0.0404145	0.0556776	0.134536	0.13	0.768722	1.39156
99% CI	0.00374259	0.0169127	0.0252962	0.0469574	0.0975193	0.18355	0.141866	0.250767	0.104101	0.111619	0.3671	0.239027	0.126481	0.0601027	0.0828013	0.200076	0.19333	1.14321	2.06946
MR1/pBBAD-hemA #1 0.005% arabinose	0.074	0.182	0.396	1.06	2.15	3.57	4.58	5.77	5.75	5.97	5.91	6.5	6.82	6.28	6.94	6.09	5.45	4.71	3.44
MR1/pBBAD-hemA #2 0.005% arabinose	0.076	0.174	0.398	1.19	2.38	3.49	4.67	5.66	6.24	6.72	6.78	6.7	6.81	6.7	6.36	5.5	4.86	4.61	4.05
MR1/pBBAD-hemA #3 0.005% arabinose	0.077	0.175	0.367	1.07	2.25	3.68	4.62	5.7	5.93	6.59	6.66	6.84	6.66	7.28	6.91	6.16	5.35	5	4.59
hfqdelta #15/vector	0.0756667	0.177	0.387	1.10667	2.26	3.58	4.62333	5.71	5.97333	6.42667	6.45	6.68	6.76333	6.75333	6.73667	5.91667	5.22	4.77333	4.02667
STD ERR of MEAN	0.000881917	0.00251661	0.0100167	0.0417665	0.0665833	0.0550757	0.0260342	0.0321455	0.143101	0.231397	0.272213	0.0986577	0.0517472	0.289904	0.188532	0.209311	0.1823	0.116952	0.332181
STD DEV	0.00152753	0.0043589	0.0173494	0.0723418	0.115326	0.0953939	0.0450925	0.0556776	0.247857	0.400791	0.471487	0.17088	0.0896289	0.502129	0.326548	0.362537	0.315753	0.202567	0.575355
99% CI	0.00227167	0.00648236	0.0258012	0.107583	0.171507	0.141866	0.0670596	0.0828013	0.368603	0.596038	0.701175	0.254125	0.133292	0.746744	0.485627	0.53915	0.469574	0.301248	0.855642
hfqdelta #15/pBBAD-hemA #1 0.005% arabinose	0.075	0.166	0.391	1.11	2.28	3.54	4.54	5.66	5.45	5.3	5.68	5.6	5.44	4.86	5.09	4.76	4.41	3.6	2.23
hfqdelta #15/pBBAD-hemA #1 0.005% arabinose	0.08	0.183	0.408	1.23	2.29	3.82	4.49	5	5.23	5.52	5.56	5.45	5.11	4.68	5.1	5.1	4.46	3.85	2.16
hfqdelta #15/pBBAD-hemA #1 0.005% arabinose	0.08	0.182	0.39	1.23	2.39	3.8	4.57	5.01	5.37	5.45	5.76	5.49	5.1	4.81	4.92	4.05	2.38	2.26	2.12
hfqdelta #15/phfq	0.0783333	0.177	0.396333	1.19	2.32	3.72	4.53333	5.22333	5.35	5.42333	5.66667	5.51333	5.21667	4.78333	5.03667	4.63667	3.75	3.23667	2.17
STD ERR of MEAN	0.00166667	0.00550757	0.00584047	0.04	0.0351188	0.090185	0.0233333	0.218352	0.064291	0.0648931	0.0581187	0.0448454	0.111704	0.0536449	0.0584047	0.309318	0.685152	0.493637	0.0321455
STD DEV	0.00288675	0.00953939	0.010116	0.069282	0.0608276	0.156205	0.0404145	0.378197	0.111355	0.112398	0.100664	0.0776745	0.193477	0.0929157	0.10116	0.535755	1.18672	0.855005	0.0556776
99% CI	0.00429305	0.0141866	0.0150441	0.103033	0.0904602	0.232301	0.0601027	0.562439	0.165603	0.167153	0.149704	0.115514	0.28773	0.13818	0.150441	0.796751	1.76483	1.27153	0.0828013
	0	1	2	3	4	5	6	7	8	9	10	11	12	13	14	15	16	17	18
MR-1/vector	0.0776667	0.200333	0.471667	1.43667	2.88	4.19667	4.83667	5.71	6.10667	6.41333	6.55667	6.80667	7.05333	6.84	6.74667	6.59667	5.8	5.39	4.64333
hfqΔ/vector	0.0723333	0.156667	0.312333	0.551	1.41	2.42333	3.21	4.16333	4.57	4.75333	4.65667	4.94333	5.04667	5.27667	5.65	5.35	5.33	4.99333	3.69333
MR-1/pgtrA	0.0756667	0.177	0.387	1.10667	2.26	3.58	4.62333	5.71	5.97333	6.42667	6.45	6.68	6.76333	6.75333	6.73667	5.91667	5.22	4.77333	4.02667
hfqΔ/pgtrA	0.0783333	0.177	0.396333	1.19	2.32	3.72	4.53333	5.22333	5.35	5.42333	5.66667	5.51333	5.21667	4.78333	5.03667	4.63667	3.75	3.23667	2.17

## Sheet: Fig. 4D raw data
549.948	-0.0017174	549.948	0.0743993	549.948	0.191555	549.948	0.0699183	549.948	0.165648	549.948	0.085323	549.948	0.206012	549.948	0.0439777	549.948	0.217452	549.948	0.0836623	549.948	0.0572566	549.948	0.107007	549.948	0.0553532	549.948	0.105436	549.948	0.0891842	549.948	0.18027	549.948	0.0728868	549.948	0.129072	549.948	0.075843	549.948	0.162013	549.948	0.101037	549.948	0.221213	549.948	0.0976343	549.948	0.226709	549.948	0.102601
535.064	0.00667733	535.064	0.0942324	535.064	0.0834332	535.064	0.0894479	535.064	0.0738099	535.064	0.107202	535.064	0.0853196	535.064	0.0578246	535.064	0.185994	535.064	0.0583486	535.064	0.0737211	535.064	0.0654532	535.064	0.0713719	535.064	0.0666394	535.064	0.112413	535.064	0.10069	535.064	0.0940635	535.064	0.0764656	535.064	0.0992877	535.064	0.0929009	535.064	0.131883	535.064	0.121354	535.064	0.126369	535.064	0.12096	535.064	0.135709
				red-ox	0.117155	0	-0.121636	0	0.09573	0	-0.0803252	0	0.120689	0	-0.162035	0	0.173475	0	0.0396846	0	-0.0264056	0	0.0497501	0	-0.0516535	0	0.0500825	0	-0.0162515	0	0.0910855	0	-0.107383	0	0.0561848	0	-0.0532286	0	0.0861698	0	-0.0609756	0	0.120176	0	-0.123579	0	0.129075	0	-0.124108
					-0.0107991	0	0.0060147	0	-0.0156381	0	0.0333926	0	-0.0218829	0	-0.027495	0	0.128169	0	0.000524018	0	0.0153726	0	-0.00826798	0	0.00591868	0	-0.00473249	0	0.0457734	0	-0.0117224	0	-0.00662678	0	-0.017598	0	0.0228222	0	-0.00638685	0	0.0389822	0	-0.0105291	0	0.00501495	0	-0.00540898	0	0.0147489
				mr1 4hr ev #1	0.127955	0	-0.127651	mr1 4hr ev #2	0.111368	0	-0.113718	mr1 4hr ev #3	0.142572	0	-0.13454	0	0.0453055	15 4hr ev #1	0.0391606	0	-0.0417782	15 4hr ev #2	0.0580181	0	-0.0575722	15 4hr ev #3	0.054815	0	-0.0620249	mr1 4hr phemA #1	0.102808	0	-0.100756	mr1 4hr phemA #2	0.0737827	0	-0.0760507	mr1 4hr phemA #3	0.0925566	0	-0.0999578	15 4hr phemA #1	0.130705	0	-0.128593	15 4hr phemA #2	0.134484	0	-0.138857
				mr1 4hr ev #2	0.111368													15 4hr ev #2	0.0580181											mr1 4hr phemA #2	0.0737827											15 4hr phemA #2	0.134484
				mr1 4hr ev #3	0.142572													15 4hr ev #3	0.054815											mr1 4hr phemA #3	0.0925566											15 4hr phemA #3	0.142684
				mr1 4hr ev mean	0.127298													15 4hr ev mean	0.0506646											mr1 4hr phemA #3	0.0897158											15 4hr phemA mean	0.135957
																not mixed properly - crap
bper alone		mr1 4hr ev ox1		mr1 4hr ev red #1		mr1 4hr ev ox #2		mr1 4hr ev red #2		mr1 4hr ev ox #3		mr1 4hr ev red #3		15 4hr ev ox #1		15 4hr ev red #1		15 4hr ev red #1		15 4hr ev ox #2		15 4hr ev red #2		15 4hr ev ox #3		15 4hr ev red #3		mr1 4hr phemA ox #1		mr1 4hr phemA red #1		mr1 4hr phemA ox #2		mr1 4hr phemA red #2		mr1 4hr phemA ox #3		mr1 4hr phemA red #3		15 4hr phemA ox #1		15 4hr phemA red #1		15 4hr phemA ox #2		15 4hr phemA red #2		15 4hr phemA ox #3
Wavelength (nm)	Abs	Wavelength (nm)	Abs	Wavelength (nm)	Abs	Wavelength (nm)	Abs	Wavelength (nm)	Abs	Wavelength (nm)	Abs	Wavelength (nm)	Abs	Wavelength (nm)	Abs	Wavelength (nm)	Abs	Wavelength (nm)	Abs	Wavelength (nm)	Abs	Wavelength (nm)	Abs	Wavelength (nm)	Abs	Wavelength (nm)	Abs	Wavelength (nm)	Abs	Wavelength (nm)	Abs	Wavelength (nm)	Abs	Wavelength (nm)	Abs	Wavelength (nm)	Abs	Wavelength (nm)	Abs	Wavelength (nm)	Abs	Wavelength (nm)	Abs	Wavelength (nm)	Abs	Wavelength (nm)	Abs	Wavelength (nm)	Abs
700.017	-9.27654e-05	700.017	0.0144193	700.017	0.00944226	700.017	0.0144216	700.017	0.00782214	700.017	0.0266401	700.017	0.00816214	700.017	0.0163243	700.017	0.120589	700.017	0.00626918	700.017	0.0184639	700.017	0.00877217	700.017	0.01462	700.017	0.0085682	700.017	0.0341152	700.017	0.0111695	700.017	0.028072	700.017	0.00852371	700.017	0.0158209	700.017	0.0170211	700.017	0.0236556	700.017	0.0135875	700.017	0.0201701	700.017	0.0130065	700.017	0.0208489
699.01	0.000166013	699.01	0.0143106	699.01	0.00963672	699.01	0.0142874	699.01	0.00813302	699.01	0.0262743	699.01	0.00844827	699.01	0.0166271	699.01	0.126921	699.01	0.00675815	699.01	0.0186303	699.01	0.00900391	699.01	0.0144292	699.01	0.00855009	699.01	0.0336717	699.01	0.0112761	699.01	0.0277105	699.01	0.00868895	699.01	0.0161482	699.01	0.0172487	699.01	0.0237113	699.01	0.0137243	699.01	0.0205224	699.01	0.0130149	699.01	0.0210499
698.002	0.000535574	698.002	0.0147799	698.002	0.0105384	698.002	0.0146782	698.002	0.00879333	698.002	0.0270617	698.002	0.00886212	698.002	0.0168659	698.002	0.12401	698.002	0.00721466	698.002	0.018909	698.002	0.00916857	698.002	0.0147231	698.002	0.00916336	698.002	0.0341581	698.002	0.0113645	698.002	0.0274894	698.002	0.00898568	698.002	0.0165304	698.002	0.0177689	698.002	0.0242305	698.002	0.0140827	698.002	0.0208436	698.002	0.0134781	698.002	0.021583
696.993	0.000850228	696.993	0.0155684	696.993	0.0105879	696.993	0.0157764	696.993	0.00923345	696.993	0.0277457	696.993	0.00938769	696.993	0.0173503	696.993	0.123697	696.993	0.0074097	696.993	0.0200582	696.993	0.0100615	696.993	0.0155764	696.993	0.0096945	696.993	0.0353429	696.993	0.0124962	696.993	0.0270959	696.993	0.0096296	696.993	0.0170979	696.993	0.0182129	696.993	0.0250797	696.993	0.0152066	696.993	0.0211846	696.993	0.0142449	696.993	0.0218402
695.985	0.00118865	695.985	0.0161947	695.985	0.0112645	695.985	0.0158241	695.985	0.00972907	695.985	0.0281869	695.985	0.00967915	695.985	0.0176804	695.985	0.122385	695.985	0.00823255	695.985	0.0205445	695.985	0.0103633	695.985	0.0156069	695.985	0.00983074	695.985	0.0361341	695.985	0.0128466	695.985	0.0274636	695.985	0.0106502	695.985	0.0177732	695.985	0.0188903	695.985	0.0257651	695.985	0.0156275	695.985	0.0220257	695.985	0.0143292	695.985	0.0224911
694.976	0.00176619	694.976	0.0165785	694.976	0.0113683	694.976	0.0162014	694.976	0.0100055	694.976	0.0285106	694.976	0.0105526	694.976	0.0176709	694.976	0.124097	694.976	0.00871063	694.976	0.0214722	694.976	0.0106966	694.976	0.0161552	694.976	0.0106368	694.976	0.0369031	694.976	0.0132602	694.976	0.0269312	694.976	0.0108197	694.976	0.0182417	694.976	0.0192278	694.976	0.026126	694.976	0.0168072	694.976	0.0222461	694.976	0.0145385	694.976	0.0230778
693.966	0.00214557	693.966	0.0167577	693.966	0.0120314	693.966	0.0172143	693.966	0.0102204	693.966	0.0284992	693.966	0.0109237	693.966	0.0175555	693.966	0.124563	693.966	0.00915545	693.966	0.022081	693.966	0.0112028	693.966	0.016852	693.966	0.0110142	693.966	0.0375107	693.966	0.0136027	693.966	0.0267808	693.966	0.0107095	693.966	0.0184115	693.966	0.0195597	693.966	0.0268115	693.966	0.0169082	693.966	0.0224119	693.966	0.0153123	693.966	0.0229474
692.957	0.00213248	692.957	0.0174071	692.957	0.012783	692.957	0.017154	692.957	0.0107135	692.957	0.0288871	692.957	0.0112686	692.957	0.0181236	692.957	0.125513	692.957	0.00957278	692.957	0.0226471	692.957	0.0113679	692.957	0.0172527	692.957	0.0113199	692.957	0.0381921	692.957	0.013551	692.957	0.0268825	692.957	0.0111425	692.957	0.0189935	692.957	0.0199689	692.957	0.0269756	692.957	0.0180983	692.957	0.0234518	692.957	0.015645	692.957	0.0234547
691.947	0.00304654	691.947	0.0177365	691.947	0.0127916	691.947	0.0176917	691.947	0.0116289	691.947	0.0291221	691.947	0.0117166	691.947	0.0184448	691.947	0.125216	691.947	0.0100914	691.947	0.0231352	691.947	0.0119299	691.947	0.0177864	691.947	0.0117266	691.947	0.0379894	691.947	0.0140913	691.947	0.0271432	691.947	0.0116712	691.947	0.0191815	691.947	0.0202156	691.947	0.0277493	691.947	0.0186685	691.947	0.0239056	691.947	0.0158465	691.947	0.024152
690.936	0.00305535	690.936	0.0182499	690.936	0.0134001	690.936	0.0177357	690.936	0.0113564	690.936	0.029446	690.936	0.0121208	690.936	0.018632	690.936	0.125753	690.936	0.0104826	690.936	0.023165	690.936	0.0121121	690.936	0.0176802	690.936	0.0118275	690.936	0.0387733	690.936	0.0145374	690.936	0.027637	690.936	0.0116655	690.936	0.0196522	690.936	0.020472	690.936	0.0282191	690.936	0.0192645	690.936	0.0242485	690.936	0.0161248	690.936	0.0243262
690.07	0.00322762	690.07	0.0180942	690.07	0.0133367	690.07	0.0183424	690.07	0.0119803	690.07	0.029542	690.07	0.0119666	690.07	0.0182229	690.07	0.126983	690.07	0.0106219	690.07	0.0238947	690.07	0.01278	690.07	0.0182891	690.07	0.0123514	690.07	0.0387198	690.07	0.0149847	690.07	0.0278279	690.07	0.012141	690.07	0.0196226	690.07	0.0207263	690.07	0.0284059	690.07	0.0191325	690.07	0.0246605	690.07	0.0165587	690.07	0.0244342
689.059	0.00373226	689.059	0.0187334	689.059	0.0137593	689.059	0.0187403	689.059	0.0121341	689.059	0.0295334	689.059	0.0127258	689.059	0.0190398	689.059	0.126317	689.059	0.0109673	689.059	0.0243943	689.059	0.0129283	689.059	0.0186358	689.059	0.0125868	689.059	0.0392171	689.059	0.0151272	689.059	0.0285072	689.059	0.0120454	689.059	0.0195632	689.059	0.0205704	689.059	0.0291605	689.059	0.0197946	689.059	0.0250451	689.059	0.0171059	689.059	0.0249217
688.048	0.00384778	688.048	0.0192377	688.048	0.0140304	688.048	0.0191392	688.048	0.0128013	688.048	0.029598	688.048	0.0128545	688.048	0.0192485	688.048	0.127571	688.048	0.0114455	688.048	0.0252765	688.048	0.0130726	688.048	0.0190174	688.048	0.0127694	688.048	0.0391695	688.048	0.0154153	688.048	0.0290658	688.048	0.0127888	688.048	0.0203888	688.048	0.0210439	688.048	0.0300147	688.048	0.0204786	688.048	0.0254529	688.048	0.0171637	688.048	0.0252033
687.036	0.00424501	687.036	0.0192342	687.036	0.0146218	687.036	0.0200223	687.036	0.0128441	687.036	0.0298435	687.036	0.0133863	687.036	0.0195137	687.036	0.1287	687.036	0.0117688	687.036	0.0259516	687.036	0.0137312	687.036	0.0196054	687.036	0.0130281	687.036	0.0396894	687.036	0.0159171	687.036	0.0294543	687.036	0.012933	687.036	0.0204791	687.036	0.0207275	687.036	0.030501	687.036	0.0203784	687.036	0.0258451	687.036	0.0173291	687.036	0.0258649
686.024	0.00463148	686.024	0.0198922	686.024	0.0149449	686.024	0.0198619	686.024	0.0133253	686.024	0.029663	686.024	0.0140891	686.024	0.0203233	686.024	0.128239	686.024	0.0119053	686.024	0.0263408	686.024	0.01398	686.024	0.0199882	686.024	0.0137282	686.024	0.0401699	686.024	0.0156988	686.024	0.0296174	686.024	0.0131134	686.024	0.0211026	686.024	0.0214426	686.024	0.0309978	686.024	0.020731	686.024	0.0263189	686.024	0.0179745	686.024	0.0257711
685.012	0.00488932	685.012	0.0201999	685.012	0.0154274	685.012	0.0202191	685.012	0.013744	685.012	0.0297589	685.012	0.0144315	685.012	0.0201517	685.012	0.127104	685.012	0.0125484	685.012	0.0265585	685.012	0.0145427	685.012	0.0201178	685.012	0.0135008	685.012	0.040321	685.012	0.0163113	685.012	0.0300163	685.012	0.0131169	685.012	0.0216556	685.012	0.0219941	685.012	0.031211	685.012	0.0207819	685.012	0.0265621	685.012	0.0179153	685.012	0.0263782
684	0.00527084	684	0.0209019	684	0.0153241	684	0.0204193	684	0.013926	684	0.0298666	684	0.0143265	684	0.0206615	684	0.127177	684	0.0126096	684	0.0262962	684	0.0145203	684	0.0206436	684	0.0140621	684	0.0398889	684	0.0166485	684	0.0301607	684	0.013834	684	0.0217065	684	0.0223095	684	0.0315983	684	0.0208976	684	0.0267037	684	0.0184479	684	0.0265567
682.987	0.00544957	682.987	0.020838	682.987	0.015709	682.987	0.0210898	682.987	0.013905	682.987	0.0300645	682.987	0.0149107	682.987	0.0210539	682.987	0.127321	682.987	0.0130187	682.987	0.0271408	682.987	0.0144441	682.987	0.021002	682.987	0.0138262	682.987	0.0401745	682.987	0.0166164	682.987	0.0308575	682.987	0.01389	682.987	0.0216822	682.987	0.0226506	682.987	0.0318227	682.987	0.0211686	682.987	0.0271685	682.987	0.0184286	682.987	0.0269079
681.974	0.00580157	681.974	0.0214886	681.974	0.0160584	681.974	0.0211503	681.974	0.0144771	681.974	0.0297058	681.974	0.0150953	681.974	0.0212235	681.974	0.128114	681.974	0.0133369	681.974	0.0271166	681.974	0.0151136	681.974	0.021124	681.974	0.0141679	681.974	0.0404376	681.974	0.0168119	681.974	0.0315476	681.974	0.0141761	681.974	0.0219452	681.974	0.0228728	681.974	0.0323098	681.974	0.0211191	681.974	0.0273846	681.974	0.0188298	681.974	0.0270736
680.96	0.00572828	680.96	0.0213442	680.96	0.0160381	680.96	0.0213534	680.96	0.0142755	680.96	0.0295848	680.96	0.0150239	680.96	0.0211989	680.96	0.131346	680.96	0.0133983	680.96	0.0274236	680.96	0.0153444	680.96	0.0216	680.96	0.0146672	680.96	0.0402486	680.96	0.0170038	680.96	0.0320327	680.96	0.0143477	680.96	0.0221246	680.96	0.0232151	680.96	0.0325452	680.96	0.0220473	680.96	0.0278848	680.96	0.0191863	680.96	0.0274001
679.946	0.00624888	679.946	0.0219614	679.946	0.0164692	679.946	0.0215518	679.946	0.0147042	679.946	0.0291478	679.946	0.0153131	679.946	0.0218031	679.946	0.132791	679.946	0.0133701	679.946	0.0273552	679.946	0.0154442	679.946	0.0216244	679.946	0.0144543	679.946	0.0401097	679.946	0.0173674	679.946	0.0322129	679.946	0.0146663	679.946	0.0223805	679.946	0.0235293	679.946	0.032379	679.946	0.0221107	679.946	0.0280806	679.946	0.019364	679.946	0.0278526
678.932	0.00615362	678.932	0.0220058	678.932	0.0168287	678.932	0.0219501	678.932	0.0149112	678.932	0.0294352	678.932	0.0154152	678.932	0.0221665	678.932	0.132167	678.932	0.013917	678.932	0.0277987	678.932	0.0158146	678.932	0.0223167	678.932	0.0149074	678.932	0.0407332	678.932	0.0175653	678.932	0.0335628	678.932	0.0147138	678.932	0.0224757	678.932	0.0238441	678.932	0.0334268	678.932	0.0230672	678.932	0.0280053	678.932	0.0196847	678.932	0.0280106
678.063	0.0062462	678.063	0.0223274	678.063	0.0170247	678.063	0.0223291	678.063	0.0153553	678.063	0.0292713	678.063	0.0157331	678.063	0.0225654	678.063	0.13334	678.063	0.0143976	678.063	0.0279615	678.063	0.0165116	678.063	0.022383	678.063	0.0153948	678.063	0.0406882	678.063	0.0179661	678.063	0.0337666	678.063	0.0149523	678.063	0.022986	678.063	0.0243162	678.063	0.0338967	678.063	0.0230182	678.063	0.0284865	678.063	0.0200644	678.063	0.028556
677.048	0.00687245	677.048	0.0230365	677.048	0.0173441	677.048	0.0218161	677.048	0.0156519	677.048	0.0290027	677.048	0.0162492	677.048	0.0224463	677.048	0.132918	677.048	0.0147608	677.048	0.0281223	677.048	0.0166145	677.048	0.0224661	677.048	0.0152465	677.048	0.0410991	677.048	0.0180572	677.048	0.0337563	677.048	0.0151668	677.048	0.0235231	677.048	0.0244331	677.048	0.0344854	677.048	0.023229	677.048	0.0284809	677.048	0.0206841	677.048	0.0294702
676.033	0.00678363	676.033	0.0227563	676.033	0.0169912	676.033	0.022509	676.033	0.0154709	676.033	0.0285406	676.033	0.0165484	676.033	0.0229109	676.033	0.131205	676.033	0.0144484	676.033	0.0282792	676.033	0.0168339	676.033	0.0230672	676.033	0.015673	676.033	0.0412203	676.033	0.0183978	676.033	0.0337566	676.033	0.015566	676.033	0.023559	676.033	0.0248101	676.033	0.0344355	676.033	0.0237438	676.033	0.02923	676.033	0.0207327	676.033	0.0298466
675.018	0.00682588	675.018	0.0229493	675.018	0.017992	675.018	0.0224413	675.018	0.0160764	675.018	0.0287646	675.018	0.0167274	675.018	0.0230944	675.018	0.132587	675.018	0.0150221	675.018	0.02851	675.018	0.0169053	675.018	0.0229288	675.018	0.0159008	675.018	0.0411881	675.018	0.0187265	675.018	0.0341421	675.018	0.0159615	675.018	0.0240769	675.018	0.0250424	675.018	0.0345417	675.018	0.0240529	675.018	0.0290945	675.018	0.0211595	675.018	0.030324
674.002	0.00730028	674.002	0.0235834	674.002	0.0179641	674.002	0.022946	674.002	0.0160487	674.002	0.0286798	674.002	0.0169114	674.002	0.0233409	674.002	0.129065	674.002	0.0148999	674.002	0.0285706	674.002	0.0174175	674.002	0.023348	674.002	0.0160842	674.002	0.0420816	674.002	0.0188146	674.002	0.0344512	674.002	0.0157667	674.002	0.0241697	674.002	0.0253884	674.002	0.035108	674.002	0.0244096	674.002	0.0294591	674.002	0.0210776	674.002	0.0308617
672.986	0.00753106	672.986	0.023538	672.986	0.018382	672.986	0.0229149	672.986	0.0164875	672.986	0.0288273	672.986	0.017135	672.986	0.0237967	672.986	0.133049	672.986	0.0155998	672.986	0.0287	672.986	0.0174497	672.986	0.0238743	672.986	0.0163432	672.986	0.0421533	672.986	0.019349	672.986	0.0343638	672.986	0.0163161	672.986	0.0247594	672.986	0.0257507	672.986	0.0354136	672.986	0.0250486	672.986	0.0298446	672.986	0.0219304	672.986	0.0308968
671.969	0.00748581	671.969	0.0241108	671.969	0.0183507	671.969	0.0233028	671.969	0.0166504	671.969	0.0284571	671.969	0.0177735	671.969	0.0238865	671.969	0.133999	671.969	0.0159095	671.969	0.0291019	671.969	0.0176337	671.969	0.0242171	671.969	0.0169914	671.969	0.0428493	671.969	0.0192575	671.969	0.0348374	671.969	0.0165005	671.969	0.0244957	671.969	0.0257715	671.969	0.0360372	671.969	0.0256882	671.969	0.0299418	671.969	0.0218447	671.969	0.0313713
670.953	0.00750098	670.953	0.0240974	670.953	0.0185268	670.953	0.0231282	670.953	0.0170151	670.953	0.0291546	670.953	0.0178815	670.953	0.0237227	670.953	0.134062	670.953	0.015786	670.953	0.0291366	670.953	0.0180176	670.953	0.0243814	670.953	0.0163592	670.953	0.0428728	670.953	0.0197539	670.953	0.0347546	670.953	0.0167857	670.953	0.0249107	670.953	0.0261528	670.953	0.0360079	670.953	0.0265606	670.953	0.0302177	670.953	0.0221115	670.953	0.0317794
669.936	0.00770854	669.936	0.0246173	669.936	0.0189913	669.936	0.0240666	669.936	0.0170839	669.936	0.0288216	669.936	0.0177777	669.936	0.0240036	669.936	0.13457	669.936	0.0160597	669.936	0.0293607	669.936	0.0184714	669.936	0.0249047	669.936	0.0171306	669.936	0.0436182	669.936	0.0200933	669.936	0.0349682	669.936	0.0166574	669.936	0.025486	669.936	0.0261426	669.936	0.0362934	669.936	0.0264806	669.936	0.0306042	669.936	0.0222763	669.936	0.0316554
669.064	0.00788295	669.064	0.0247557	669.064	0.0192264	669.064	0.0244881	669.064	0.0170191	669.064	0.0289008	669.064	0.0180249	669.064	0.0243854	669.064	0.138283	669.064	0.0161031	669.064	0.0294169	669.064	0.0179813	669.064	0.0256073	669.064	0.0174983	669.064	0.0434244	669.064	0.0206315	669.064	0.0356194	669.064	0.0173172	669.064	0.0256151	669.064	0.0264171	669.064	0.0366088	669.064	0.027108	669.064	0.030899	669.064	0.0228355	669.064	0.0322832
668.046	0.00795376	668.046	0.0248861	668.046	0.0194697	668.046	0.0246165	668.046	0.0172397	668.046	0.0290125	668.046	0.0178939	668.046	0.0244772	668.046	0.136025	668.046	0.0163896	668.046	0.0290132	668.046	0.0186436	668.046	0.0257616	668.046	0.0169619	668.046	0.0432302	668.046	0.0205147	668.046	0.0360338	668.046	0.0176828	668.046	0.0254456	668.046	0.0263704	668.046	0.0370886	668.046	0.0274352	668.046	0.0308409	668.046	0.0230755	668.046	0.0321971
667.028	0.00769668	667.028	0.0248886	667.028	0.0187283	667.028	0.0245592	667.028	0.0173947	667.028	0.0293383	667.028	0.0176515	667.028	0.0242217	667.028	0.135451	667.028	0.0161309	667.028	0.0289004	667.028	0.0184317	667.028	0.0253616	667.028	0.0170713	667.028	0.0426849	667.028	0.0201693	667.028	0.0357407	667.028	0.0173467	667.028	0.0255706	667.028	0.0259453	667.028	0.036223	667.028	0.0275131	667.028	0.0304721	667.028	0.022788	667.028	0.0324288
666.01	0.0077605	666.01	0.0243687	666.01	0.0192713	666.01	0.0249284	666.01	0.0168117	666.01	0.02913	666.01	0.0178963	666.01	0.0240743	666.01	0.134257	666.01	0.0158809	666.01	0.0284278	666.01	0.017699	666.01	0.0255488	666.01	0.017439	666.01	0.042904	666.01	0.0206511	666.01	0.0362682	666.01	0.0168812	666.01	0.0254399	666.01	0.0259557	666.01	0.0358559	666.01	0.0281046	666.01	0.0303085	666.01	0.023036	666.01	0.0318312
664.992	0.00748462	664.992	0.0250879	664.992	0.0189248	664.992	0.0252696	664.992	0.0168065	664.992	0.0292631	664.992	0.0176987	664.992	0.0240745	664.992	0.135292	664.992	0.0157624	664.992	0.0279905	664.992	0.0185331	664.992	0.0257075	664.992	0.0169801	664.992	0.0423508	664.992	0.0203792	664.992	0.0365125	664.992	0.0172121	664.992	0.025573	664.992	0.0255377	664.992	0.0360124	664.992	0.0279097	664.992	0.030647	664.992	0.0230494	664.992	0.0319494
663.973	0.00778137	663.973	0.0245697	663.973	0.0191454	663.973	0.0255816	663.973	0.0168599	663.973	0.0293583	663.973	0.0177005	663.973	0.0244598	663.973	0.134171	663.973	0.0159267	663.973	0.0284624	663.973	0.0184904	663.973	0.0260434	663.973	0.0175878	663.973	0.0424125	663.973	0.0206836	663.973	0.036807	663.973	0.0173366	663.973	0.0260131	663.973	0.0253698	663.973	0.035908	663.973	0.0280856	663.973	0.0305024	663.973	0.0229287	663.973	0.0318627
662.954	0.00774661	662.954	0.0250018	662.954	0.0188148	662.954	0.0254045	662.954	0.0170878	662.954	0.0292074	662.954	0.0179807	662.954	0.0243753	662.954	0.13435	662.954	0.0161453	662.954	0.0282478	662.954	0.0184005	662.954	0.0265435	662.954	0.0173197	662.954	0.0420677	662.954	0.0206762	662.954	0.0367696	662.954	0.0172675	662.954	0.0257615	662.954	0.0254877	662.954	0.0360592	662.954	0.0286659	662.954	0.0302052	662.954	0.0236403	662.954	0.0313532
661.934	0.00765721	661.934	0.0249653	661.934	0.0189109	661.934	0.0262955	661.934	0.0169891	661.934	0.0293945	661.934	0.0180466	661.934	0.0240833	661.934	0.133558	661.934	0.0159295	661.934	0.0281542	661.934	0.0186121	661.934	0.0266787	661.934	0.0173883	661.934	0.0415899	661.934	0.0209565	661.934	0.0371045	661.934	0.0175409	661.934	0.0263208	661.934	0.0256134	661.934	0.0362101	661.934	0.0285158	661.934	0.0305333	661.934	0.0236362	661.934	0.0319678
661.06	0.00774169	661.06	0.0249376	661.06	0.0193419	661.06	0.0267689	661.06	0.0170024	661.06	0.0294221	661.06	0.0182014	661.06	0.0242506	661.06	0.132546	661.06	0.0161967	661.06	0.0281097	661.06	0.018746	661.06	0.0271006	661.06	0.0175839	661.06	0.0413943	661.06	0.0211616	661.06	0.0373411	661.06	0.0177318	661.06	0.0256001	661.06	0.0252808	661.06	0.0359811	661.06	0.0288187	661.06	0.0308299	661.06	0.0237004	661.06	0.0314309
660.04	0.00746192	660.04	0.0249945	660.04	0.0189807	660.04	0.0265556	660.04	0.0168987	660.04	0.0295126	660.04	0.0181061	660.04	0.0247169	660.04	0.134632	660.04	0.016056	660.04	0.0282364	660.04	0.0184949	660.04	0.0269678	660.04	0.0175213	660.04	0.0414716	660.04	0.0212255	660.04	0.037433	660.04	0.0175562	660.04	0.0260935	660.04	0.0253987	660.04	0.0361536	660.04	0.0289379	660.04	0.0310795	660.04	0.0239412	660.04	0.0310601
659.02	0.00770682	659.02	0.024727	659.02	0.0189945	659.02	0.0263966	659.02	0.0170804	659.02	0.0295331	659.02	0.0180536	659.02	0.02475	659.02	0.139538	659.02	0.0161217	659.02	0.0278129	659.02	0.0188079	659.02	0.027158	659.02	0.0174165	659.02	0.041385	659.02	0.0211966	659.02	0.0375857	659.02	0.0177386	659.02	0.0260768	659.02	0.025527	659.02	0.0359499	659.02	0.0288959	659.02	0.0307379	659.02	0.0241475	659.02	0.0310504
657.999	0.00776951	657.999	0.0252241	657.999	0.0191408	657.999	0.0267277	657.999	0.0170722	657.999	0.0297374	657.999	0.0179364	657.999	0.0248728	657.999	0.138145	657.999	0.0159875	657.999	0.0275035	657.999	0.018492	657.999	0.0274249	657.999	0.0174553	657.999	0.0414465	657.999	0.0216729	657.999	0.0378653	657.999	0.0179684	657.999	0.0264035	657.999	0.0256774	657.999	0.0358966	657.999	0.0295648	657.999	0.0311941	657.999	0.0242854	657.999	0.0315204
656.978	0.00750912	656.978	0.0250618	656.978	0.0192893	656.978	0.0270127	656.978	0.0170427	656.978	0.0298294	656.978	0.0181231	656.978	0.0251105	656.978	0.138366	656.978	0.0161842	656.978	0.0281475	656.978	0.0187601	656.978	0.0278708	656.978	0.0176072	656.978	0.0415231	656.978	0.0220703	656.978	0.0378673	656.978	0.0180081	656.978	0.0262284	656.978	0.0256196	656.978	0.0362262	656.978	0.0290694	656.978	0.030931	656.978	0.0245086	656.978	0.0312316
655.957	0.0075256	655.957	0.0252546	655.957	0.0193649	655.957	0.0272023	655.957	0.0169141	655.957	0.0299606	655.957	0.0180853	655.957	0.0248355	655.957	0.139251	655.957	0.0161091	655.957	0.0277659	655.957	0.018867	655.957	0.0282601	655.957	0.0178336	655.957	0.0409998	655.957	0.021814	655.957	0.0382975	655.957	0.0179411	655.957	0.0265437	655.957	0.0254051	655.957	0.0361807	655.957	0.0291988	655.957	0.0313041	655.957	0.0247443	655.957	0.0314639
654.936	0.00735831	654.936	0.0252999	654.936	0.0191989	654.936	0.0274929	654.936	0.0173681	654.936	0.030132	654.936	0.0182046	654.936	0.0249943	654.936	0.137772	654.936	0.0160567	654.936	0.0279818	654.936	0.0189225	654.936	0.0283608	654.936	0.0180311	654.936	0.0410119	654.936	0.0219352	654.936	0.0386661	654.936	0.0181848	654.936	0.0267221	654.936	0.025863	654.936	0.0367413	654.936	0.0291909	654.936	0.0309567	654.936	0.0253395	654.936	0.0314335
654.06	0.00742769	654.06	0.0253205	654.06	0.0193095	654.06	0.0275969	654.06	0.0169824	654.06	0.0303547	654.06	0.0183074	654.06	0.0249675	654.06	0.138119	654.06	0.016156	654.06	0.0279875	654.06	0.0189573	654.06	0.028649	654.06	0.0182496	654.06	0.0411401	654.06	0.0222334	654.06	0.0385701	654.06	0.0185857	654.06	0.0267322	654.06	0.0261766	654.06	0.0366894	654.06	0.0298211	654.06	0.0321412	654.06	0.0254408	654.06	0.031137
653.037	0.00732003	653.037	0.0255481	653.037	0.0197068	653.037	0.0279171	653.037	0.0168134	653.037	0.0306488	653.037	0.0182446	653.037	0.0253011	653.037	0.138321	653.037	0.0163461	653.037	0.0280124	653.037	0.0190222	653.037	0.029049	653.037	0.0181568	653.037	0.0414514	653.037	0.0222662	653.037	0.039019	653.037	0.0188673	653.037	0.0267375	653.037	0.0258964	653.037	0.0370368	653.037	0.0296876	653.037	0.0322383	653.037	0.0257086	653.037	0.0318499
652.015	0.00763727	652.015	0.0256255	652.015	0.0193861	652.015	0.0283204	652.015	0.0172738	652.015	0.0307121	652.015	0.0185061	652.015	0.0250359	652.015	0.139765	652.015	0.0162543	652.015	0.0279533	652.015	0.0191687	652.015	0.0290623	652.015	0.0184829	652.015	0.0417496	652.015	0.0226445	652.015	0.0395175	652.015	0.018756	652.015	0.0271433	652.015	0.0265226	652.015	0.03719	652.015	0.029834	652.015	0.0325691	652.015	0.0257241	652.015	0.0319238
650.992	0.00782852	650.992	0.0258746	650.992	0.019537	650.992	0.028453	650.992	0.0171829	650.992	0.0309968	650.992	0.0188013	650.992	0.0255166	650.992	0.140461	650.992	0.0161833	650.992	0.0282177	650.992	0.0188305	650.992	0.0288072	650.992	0.0181928	650.992	0.0420591	650.992	0.0226619	650.992	0.039839	650.992	0.0187708	650.992	0.0271094	650.992	0.0265784	650.992	0.0366709	650.992	0.0300182	650.992	0.0327872	650.992	0.0261826	650.992	0.032436
649.969	0.0074462	649.969	0.0261638	649.969	0.0196417	649.969	0.0285224	649.969	0.0175603	649.969	0.0312558	649.969	0.0188527	649.969	0.0257668	649.969	0.138908	649.969	0.0165875	649.969	0.0283649	649.969	0.0191679	649.969	0.0289821	649.969	0.0189662	649.969	0.0425307	649.969	0.0232726	649.969	0.0399584	649.969	0.0193339	649.969	0.0276834	649.969	0.0269726	649.969	0.0375753	649.969	0.0303003	649.969	0.0328963	649.969	0.02681	649.969	0.0331615
648.946	0.00754944	648.946	0.0267182	648.946	0.0202343	648.946	0.0289429	648.946	0.0172323	648.946	0.0313744	648.946	0.0189694	648.946	0.0258239	648.946	0.138791	648.946	0.0168257	648.946	0.0280276	648.946	0.0192618	648.946	0.0293179	648.946	0.0188904	648.946	0.0428732	648.946	0.023222	648.946	0.0402157	648.946	0.0191973	648.946	0.0276087	648.946	0.026738	648.946	0.0378812	648.946	0.0303168	648.946	0.0333364	648.946	0.0271024	648.946	0.0332066
648.068	0.00727965	648.068	0.0263573	648.068	0.0199264	648.068	0.0287889	648.068	0.0174891	648.068	0.0313499	648.068	0.0191618	648.068	0.0259745	648.068	0.139991	648.068	0.0171006	648.068	0.0286064	648.068	0.0196435	648.068	0.0294657	648.068	0.0191742	648.068	0.0430882	648.068	0.0231991	648.068	0.0408962	648.068	0.0194869	648.068	0.0283868	648.068	0.0267299	648.068	0.0379277	648.068	0.0308569	648.068	0.0335678	648.068	0.0271979	648.068	0.033815
647.044	0.00751812	647.044	0.0267469	647.044	0.0199114	647.044	0.0284771	647.044	0.0177661	647.044	0.0314846	647.044	0.0189817	647.044	0.0262405	647.044	0.139738	647.044	0.0167042	647.044	0.0287745	647.044	0.019742	647.044	0.0298031	647.044	0.01907	647.044	0.0434354	647.044	0.0236732	647.044	0.0407932	647.044	0.0199152	647.044	0.0287066	647.044	0.0268476	647.044	0.0380923	647.044	0.0310042	647.044	0.0339648	647.044	0.0276965	647.044	0.0341094
646.02	0.00780256	646.02	0.0271523	646.02	0.0197961	646.02	0.0286638	646.02	0.017677	646.02	0.0318894	646.02	0.0193905	646.02	0.0261189	646.02	0.141296	646.02	0.0166973	646.02	0.0287984	646.02	0.0194768	646.02	0.0298422	646.02	0.0189596	646.02	0.0439767	646.02	0.0236453	646.02	0.0409663	646.02	0.0202699	646.02	0.0286548	646.02	0.0271793	646.02	0.0383932	646.02	0.0312572	646.02	0.034189	646.02	0.027597	646.02	0.0346946
644.996	0.00800175	644.996	0.0272177	644.996	0.0202315	644.996	0.0286922	644.996	0.0176455	644.996	0.0318402	644.996	0.019289	644.996	0.0262484	644.996	0.139101	644.996	0.0173572	644.996	0.0291911	644.996	0.0193931	644.996	0.0293712	644.996	0.0196731	644.996	0.044127	644.996	0.0239218	644.996	0.0411014	644.996	0.0200065	644.996	0.0291006	644.996	0.0274944	644.996	0.0387831	644.996	0.0311992	644.996	0.0347381	644.996	0.0285903	644.996	0.0351043
643.971	0.00780251	643.971	0.027541	643.971	0.0202296	643.971	0.02853	643.971	0.0177618	643.971	0.0322808	643.971	0.0194724	643.971	0.0266133	643.971	0.14082	643.971	0.0168672	643.971	0.0297538	643.971	0.0194212	643.971	0.0298106	643.971	0.0193738	643.971	0.0450371	643.971	0.0238022	643.971	0.0415803	643.971	0.0204549	643.971	0.0294795	643.971	0.0277074	643.971	0.039128	643.971	0.0314378	643.971	0.0350373	643.971	0.0289879	643.971	0.0358291
642.946	0.0076247	642.946	0.0277395	642.946	0.0206275	642.946	0.0285456	642.946	0.0179047	642.946	0.0322286	642.946	0.0196715	642.946	0.0263434	642.946	0.140299	642.946	0.0169578	642.946	0.0299824	642.946	0.0194367	642.946	0.029796	642.946	0.019608	642.946	0.0448825	642.946	0.0242124	642.946	0.0419236	642.946	0.020264	642.946	0.0299513	642.946	0.027327	642.946	0.0391738	642.946	0.0313049	642.946	0.0356467	642.946	0.0290713	642.946	0.0362058
642.067	0.00789242	642.067	0.0276975	642.067	0.0205765	642.067	0.0284849	642.067	0.0180074	642.067	0.0323305	642.067	0.0197885	642.067	0.0264015	642.067	0.140983	642.067	0.0167734	642.067	0.0300761	642.067	0.019798	642.067	0.0300942	642.067	0.0194776	642.067	0.0452421	642.067	0.0241303	642.067	0.0423398	642.067	0.0203771	642.067	0.0300359	642.067	0.0272164	642.067	0.0394838	642.067	0.0316361	642.067	0.0357734	642.067	0.0294419	642.067	0.0366451
641.041	0.00772835	641.041	0.0281072	641.041	0.0205987	641.041	0.0287655	641.041	0.0180898	641.041	0.0326933	641.041	0.0197039	641.041	0.0263203	641.041	0.140118	641.041	0.0169364	641.041	0.0303416	641.041	0.0194371	641.041	0.0306875	641.041	0.0194992	641.041	0.0454011	641.041	0.023954	641.041	0.0425082	641.041	0.0205087	641.041	0.0304584	641.041	0.0277193	641.041	0.0396866	641.041	0.0313148	641.041	0.0358953	641.041	0.0298655	641.041	0.037028
640.015	0.00811936	640.015	0.0282114	640.015	0.0209666	640.015	0.028797	640.015	0.0181629	640.015	0.0325332	640.015	0.0202014	640.015	0.0266438	640.015	0.141376	640.015	0.0168744	640.015	0.0308317	640.015	0.0195371	640.015	0.0302963	640.015	0.0198976	640.015	0.0457666	640.015	0.0242245	640.015	0.0422113	640.015	0.0206084	640.015	0.0303695	640.015	0.0275506	640.015	0.0400561	640.015	0.0314771	640.015	0.0361406	640.015	0.030096	640.015	0.037645
638.989	0.00807382	638.989	0.0284097	638.989	0.0205171	638.989	0.0288412	638.989	0.018258	638.989	0.0328751	638.989	0.0201995	638.989	0.0270767	638.989	0.140272	638.989	0.0172476	638.989	0.0311366	638.989	0.0195029	638.989	0.0306396	638.989	0.0199115	638.989	0.0461931	638.989	0.0241981	638.989	0.0423653	638.989	0.0206338	638.989	0.0312225	638.989	0.027438	638.989	0.0401058	638.989	0.0316381	638.989	0.0367094	638.989	0.0306823	638.989	0.0377302
637.962	0.00794986	637.962	0.0289847	637.962	0.0208316	637.962	0.0286507	637.962	0.0184239	637.962	0.0331331	637.962	0.0204253	637.962	0.0267134	637.962	0.141567	637.962	0.0175199	637.962	0.0314888	637.962	0.0197123	637.962	0.0307143	637.962	0.0201295	637.962	0.0469194	637.962	0.0243141	637.962	0.0423822	637.962	0.0209378	637.962	0.0314538	637.962	0.0278157	637.962	0.040631	637.962	0.0314669	637.962	0.037117	637.962	0.0307204	637.962	0.0382385
636.935	0.00828136	636.935	0.0293002	636.935	0.0210445	636.935	0.0289146	636.935	0.0184639	636.935	0.0333967	636.935	0.0205708	636.935	0.0267645	636.935	0.14126	636.935	0.0170814	636.935	0.0319162	636.935	0.0197734	636.935	0.0307563	636.935	0.0201001	636.935	0.047583	636.935	0.0243335	636.935	0.0424493	636.935	0.0209791	636.935	0.0319905	636.935	0.027597	636.935	0.040998	636.935	0.031648	636.935	0.0375642	636.935	0.0312304	636.935	0.038648
636.055	0.00824674	636.055	0.0296804	636.055	0.021011	636.055	0.0293315	636.055	0.0188022	636.055	0.0338257	636.055	0.020869	636.055	0.0272989	636.055	0.140694	636.055	0.0175148	636.055	0.032431	636.055	0.0199927	636.055	0.0311539	636.055	0.0203153	636.055	0.0481962	636.055	0.0244427	636.055	0.0426951	636.055	0.0210017	636.055	0.0324282	636.055	0.0277571	636.055	0.0416995	636.055	0.0317606	636.055	0.0383443	636.055	0.0313234	636.055	0.0395284
635.027	0.00815199	635.027	0.0300363	635.027	0.0213583	635.027	0.0295125	635.027	0.0187698	635.027	0.0341103	635.027	0.0207863	635.027	0.0272915	635.027	0.142494	635.027	0.0177138	635.027	0.0329604	635.027	0.0198993	635.027	0.0314098	635.027	0.0204778	635.027	0.0491306	635.027	0.0247381	635.027	0.0422551	635.027	0.0211387	635.027	0.0329964	635.027	0.0278565	635.027	0.0419998	635.027	0.0320385	635.027	0.0387629	635.027	0.0313281	635.027	0.0398383
633.999	0.00793486	633.999	0.0296152	633.999	0.0213862	633.999	0.0295853	633.999	0.0191192	633.999	0.0338656	633.999	0.020831	633.999	0.0275557	633.999	0.143731	633.999	0.0177612	633.999	0.0330214	633.999	0.0200701	633.999	0.031582	633.999	0.02035	633.999	0.0495789	633.999	0.0246974	633.999	0.0425846	633.999	0.021427	633.999	0.0332244	633.999	0.0278786	633.999	0.0423353	633.999	0.0319884	633.999	0.0392789	633.999	0.0316128	633.999	0.0401631
632.971	0.00829941	632.971	0.0305004	632.971	0.0216122	632.971	0.0297991	632.971	0.019133	632.971	0.0347983	632.971	0.0208038	632.971	0.0276389	632.971	0.143493	632.971	0.0177582	632.971	0.0335147	632.971	0.020141	632.971	0.0319747	632.971	0.0206483	632.971	0.0498145	632.971	0.02468	632.971	0.0425145	632.971	0.0213248	632.971	0.0339552	632.971	0.0280105	632.971	0.042221	632.971	0.0317628	632.971	0.0396244	632.971	0.0315269	632.971	0.0408158
631.943	0.00812271	631.943	0.0306607	631.943	0.0219261	631.943	0.0303834	631.943	0.0191753	631.943	0.0348105	631.943	0.0210815	631.943	0.0278399	631.943	0.141709	631.943	0.0180071	631.943	0.0340477	631.943	0.0201373	631.943	0.0321009	631.943	0.020636	631.943	0.0504346	631.943	0.0249265	631.943	0.042533	631.943	0.0217797	631.943	0.0342335	631.943	0.0278484	631.943	0.0430581	631.943	0.0321984	631.943	0.0403388	631.943	0.0321375	631.943	0.0408911
631.061	0.00839287	631.061	0.031076	631.061	0.0219846	631.061	0.0307606	631.061	0.0196979	631.061	0.0354785	631.061	0.0212704	631.061	0.0283023	631.061	0.144539	631.061	0.01812	631.061	0.0346454	631.061	0.0205401	631.061	0.0326079	631.061	0.0212743	631.061	0.0511293	631.061	0.0252134	631.061	0.0430672	631.061	0.0221801	631.061	0.0353247	631.061	0.0279789	631.061	0.0439583	631.061	0.032317	631.061	0.0408978	631.061	0.0324048	631.061	0.0422111
630.032	0.00831334	630.032	0.0314095	630.032	0.0218836	630.032	0.0309662	630.032	0.0196418	630.032	0.0360297	630.032	0.0215529	630.032	0.0281743	630.032	0.144486	630.032	0.0182588	630.032	0.035012	630.032	0.0204191	630.032	0.0325525	630.032	0.0214087	630.032	0.0515925	630.032	0.0252002	630.032	0.043233	630.032	0.0224012	630.032	0.0357799	630.032	0.0281839	630.032	0.0444063	630.032	0.0325853	630.032	0.0417883	630.032	0.0324665	630.032	0.0425356
629.003	0.00847469	629.003	0.0318963	629.003	0.0223233	629.003	0.0313572	629.003	0.0198236	629.003	0.0364315	629.003	0.0214529	629.003	0.0284271	629.003	0.141145	629.003	0.0184137	629.003	0.0355332	629.003	0.0209024	629.003	0.0329919	629.003	0.02156	629.003	0.0523526	629.003	0.0254134	629.003	0.0432933	629.003	0.0223185	629.003	0.0358991	629.003	0.0281535	629.003	0.0448194	629.003	0.0328674	629.003	0.041814	629.003	0.0324987	629.003	0.0426307
627.973	0.00846065	627.973	0.031967	627.973	0.0224864	627.973	0.0316002	627.973	0.019862	627.973	0.0366435	627.973	0.0218738	627.973	0.0284744	627.973	0.142925	627.973	0.0186988	627.973	0.0360991	627.973	0.0209052	627.973	0.0331793	627.973	0.0215184	627.973	0.0529741	627.973	0.0253708	627.973	0.0439028	627.973	0.0223439	627.973	0.0365942	627.973	0.0283215	627.973	0.0456129	627.973	0.0330894	627.973	0.0426449	627.973	0.0328175	627.973	0.0434517
626.943	0.0082468	626.943	0.0327214	626.943	0.0224495	626.943	0.0323106	626.943	0.0200399	626.943	0.0369	626.943	0.0218408	626.943	0.0285654	626.943	0.146943	626.943	0.0180972	626.943	0.0364477	626.943	0.0207545	626.943	0.033572	626.943	0.0215532	626.943	0.0534655	626.943	0.0256206	626.943	0.0437867	626.943	0.0222585	626.943	0.036854	626.943	0.0285547	626.943	0.0457235	626.943	0.0331719	626.943	0.043052	626.943	0.0326593	626.943	0.0442094
626.061	0.00841494	626.061	0.033045	626.061	0.0226766	626.061	0.0323318	626.061	0.0199294	626.061	0.0371136	626.061	0.0222196	626.061	0.0284016	626.061	0.146089	626.061	0.0184482	626.061	0.036771	626.061	0.0209766	626.061	0.0334937	626.061	0.0217836	626.061	0.0541416	626.061	0.0257339	626.061	0.0443875	626.061	0.0225842	626.061	0.0374064	626.061	0.0284059	626.061	0.0465617	626.061	0.0335373	626.061	0.0436113	626.061	0.0327234	626.061	0.0448748
625.03	0.00790884	625.03	0.0331558	625.03	0.0226682	625.03	0.0326546	625.03	0.0201197	625.03	0.0379733	625.03	0.0221027	625.03	0.0288703	625.03	0.14497	625.03	0.0182708	625.03	0.0369432	625.03	0.0210718	625.03	0.0337587	625.03	0.0213999	625.03	0.0545529	625.03	0.0259619	625.03	0.0445336	625.03	0.0229153	625.03	0.0379765	625.03	0.0287545	625.03	0.0471496	625.03	0.0337104	625.03	0.0441919	625.03	0.0331107	625.03	0.0454367
624	0.0079125	624	0.0334666	624	0.0230806	624	0.0334091	624	0.0201463	624	0.0380389	624	0.0222898	624	0.0288423	624	0.146397	624	0.0187116	624	0.0376723	624	0.0217221	624	0.0339066	624	0.0219331	624	0.0557235	624	0.0260723	624	0.0450295	624	0.0228465	624	0.0387862	624	0.0289044	624	0.0481573	624	0.0344991	624	0.0453224	624	0.0331108	624	0.0467391
622.969	0.00814001	622.969	0.0342455	622.969	0.0232254	622.969	0.0336923	622.969	0.0205705	622.969	0.0391506	622.969	0.0222635	622.969	0.0289501	622.969	0.144727	622.969	0.0187562	622.969	0.0376017	622.969	0.02131	622.969	0.034128	622.969	0.0218876	622.969	0.0564213	622.969	0.0264107	622.969	0.0456503	622.969	0.0231557	622.969	0.0391607	622.969	0.0293	622.969	0.0483631	622.969	0.0352815	622.969	0.0459579	622.969	0.0334534	622.969	0.0473482
621.937	0.00809708	621.937	0.0346646	621.937	0.0233845	621.937	0.0341059	621.937	0.0208402	621.937	0.0397801	621.937	0.0225372	621.937	0.0293628	621.937	0.146706	621.937	0.0188823	621.937	0.0380704	621.937	0.0215475	621.937	0.0344475	621.937	0.0219648	621.937	0.057241	621.937	0.0265745	621.937	0.0459749	621.937	0.0236687	621.937	0.0400091	621.937	0.0294928	621.937	0.0496438	621.937	0.0351263	621.937	0.0470148	621.937	0.0334757	621.937	0.0486733
621.053	0.00812021	621.053	0.0345213	621.053	0.0234259	621.053	0.0338879	621.053	0.0208829	621.053	0.0397293	621.053	0.0225934	621.053	0.029379	621.053	0.146447	621.053	0.0189699	621.053	0.0382601	621.053	0.0220466	621.053	0.0347024	621.053	0.0220568	621.053	0.0574348	621.053	0.0270357	621.053	0.0465665	621.053	0.0239864	621.053	0.0401255	621.053	0.0296122	621.053	0.0501096	621.053	0.0357981	621.053	0.0471528	621.053	0.0336947	621.053	0.0492673
620.021	0.0084621	620.021	0.0352529	620.021	0.0236003	620.021	0.0347935	620.021	0.0210694	620.021	0.0402294	620.021	0.0228921	620.021	0.0294405	620.021	0.145904	620.021	0.0188741	620.021	0.0384065	620.021	0.0216762	620.021	0.0349973	620.021	0.022385	620.021	0.0578657	620.021	0.027453	620.021	0.0471876	620.021	0.0239897	620.021	0.0411042	620.021	0.0298194	620.021	0.0507411	620.021	0.0358473	620.021	0.0477442	620.021	0.0334892	620.021	0.0499841
618.989	0.00842438	618.989	0.0355862	618.989	0.0240789	618.989	0.0354945	618.989	0.0211655	618.989	0.0411404	618.989	0.0232378	618.989	0.0296964	618.989	0.146946	618.989	0.0191443	618.989	0.0391338	618.989	0.0222891	618.989	0.0354633	618.989	0.0228071	618.989	0.0586301	618.989	0.0275592	618.989	0.0473118	618.989	0.0243785	618.989	0.0414645	618.989	0.0300725	618.989	0.0515963	618.989	0.0362487	618.989	0.0483996	618.989	0.0336926	618.989	0.0508784
617.957	0.00816992	617.957	0.0357257	617.957	0.0241455	617.957	0.0354013	617.957	0.0214931	617.957	0.041055	617.957	0.0231673	617.957	0.0299376	617.957	0.146419	617.957	0.0192738	617.957	0.0389301	617.957	0.0222486	617.957	0.0355385	617.957	0.0227095	617.957	0.0588872	617.957	0.0273284	617.957	0.0476996	617.957	0.0243516	617.957	0.041801	617.957	0.0298893	617.957	0.051371	617.957	0.0362671	617.957	0.0489571	617.957	0.0334133	617.957	0.051273
617.072	0.00813477	617.072	0.0365544	617.072	0.0244	617.072	0.036285	617.072	0.0216507	617.072	0.0415772	617.072	0.0234805	617.072	0.0303042	617.072	0.146686	617.072	0.0195068	617.072	0.0392737	617.072	0.0223471	617.072	0.0360294	617.072	0.0227263	617.072	0.0594264	617.072	0.0274015	617.072	0.0479951	617.072	0.0244066	617.072	0.0422838	617.072	0.0300195	617.072	0.0522881	617.072	0.0362312	617.072	0.0491405	617.072	0.0332159	617.072	0.0520476
616.039	0.00828368	616.039	0.0369498	616.039	0.0243492	616.039	0.0362899	616.039	0.0215189	616.039	0.0422268	616.039	0.0235396	616.039	0.0304	616.039	0.14548	616.039	0.0197293	616.039	0.0396579	616.039	0.0226552	616.039	0.0363743	616.039	0.0231468	616.039	0.0595825	616.039	0.0273874	616.039	0.0482442	616.039	0.0244484	616.039	0.0423227	616.039	0.0299172	616.039	0.0523171	616.039	0.0365392	616.039	0.049409	616.039	0.0327677	616.039	0.0523423
615.005	0.0083982	615.005	0.0371838	615.005	0.0246658	615.005	0.0367965	615.005	0.0217119	615.005	0.0425546	615.005	0.0236536	615.005	0.0309385	615.005	0.147959	615.005	0.0198804	615.005	0.0400518	615.005	0.0226557	615.005	0.0365179	615.005	0.022849	615.005	0.0595188	615.005	0.0272254	615.005	0.048643	615.005	0.024653	615.005	0.0427128	615.005	0.0298964	615.005	0.0526255	615.005	0.0361904	615.005	0.0496579	615.005	0.0326704	615.005	0.052903
613.972	0.00836424	613.972	0.0375521	613.972	0.0246844	613.972	0.0373672	613.972	0.0218602	613.972	0.0428343	613.972	0.0238764	613.972	0.0311481	613.972	0.145296	613.972	0.0199961	613.972	0.0403303	613.972	0.0227921	613.972	0.0367084	613.972	0.0232444	613.972	0.0598714	613.972	0.0272369	613.972	0.048484	613.972	0.0245199	613.972	0.0429124	613.972	0.0296212	613.972	0.0523439	613.972	0.0363809	613.972	0.0502867	613.972	0.0329862	613.972	0.0530005
612.938	0.0081153	612.938	0.0380725	612.938	0.0247578	612.938	0.0373698	612.938	0.0218991	612.938	0.0434726	612.938	0.0240521	612.938	0.0316359	612.938	0.147474	612.938	0.0200625	612.938	0.040497	612.938	0.0229773	612.938	0.0371027	612.938	0.0230981	612.938	0.0598107	612.938	0.0269032	612.938	0.0486163	612.938	0.0243803	612.938	0.043145	612.938	0.029882	612.938	0.0527799	612.938	0.0360787	612.938	0.0504057	612.938	0.0327417	612.938	0.0532594
612.052	0.00815238	612.052	0.0383001	612.052	0.0250787	612.052	0.0381469	612.052	0.0218911	612.052	0.0437226	612.052	0.0239777	612.052	0.0316831	612.052	0.147514	612.052	0.0199326	612.052	0.0408135	612.052	0.0233281	612.052	0.0376633	612.052	0.0232715	612.052	0.0601753	612.052	0.0271619	612.052	0.0488894	612.052	0.0246007	612.052	0.0435401	612.052	0.0295241	612.052	0.0531659	612.052	0.0362542	612.052	0.0505208	612.052	0.0325019	612.052	0.0536194
611.017	0.00831381	611.017	0.0388516	611.017	0.0249662	611.017	0.038442	611.017	0.0222604	611.017	0.0440591	611.017	0.0243025	611.017	0.0319987	611.017	0.144801	611.017	0.0202852	611.017	0.0410242	611.017	0.0231382	611.017	0.0378964	611.017	0.0235438	611.017	0.0603237	611.017	0.0269354	611.017	0.0492074	611.017	0.0242263	611.017	0.0438028	611.017	0.0294134	611.017	0.0536065	611.017	0.0361818	611.017	0.0510218	611.017	0.0322626	611.017	0.0539246
609.983	0.00804555	609.983	0.0391959	609.983	0.024967	609.983	0.0387325	609.983	0.0222487	609.983	0.0441738	609.983	0.0242005	609.983	0.0322442	609.983	0.149422	609.983	0.0200686	609.983	0.0411444	609.983	0.023323	609.983	0.0380208	609.983	0.0231837	609.983	0.0604298	609.983	0.0267471	609.983	0.049244	609.983	0.0241999	609.983	0.0438248	609.983	0.0292291	609.983	0.0536714	609.983	0.0357978	609.983	0.0513148	609.983	0.0322345	609.983	0.0543225
608.948	0.00798276	608.948	0.0396357	608.948	0.024925	608.948	0.0388373	608.948	0.022207	608.948	0.0444561	608.948	0.0242678	608.948	0.0323693	608.948	0.152542	608.948	0.0202741	608.948	0.0411439	608.948	0.0233533	608.948	0.0383037	608.948	0.0235276	608.948	0.0603893	608.948	0.0268346	608.948	0.0492594	608.948	0.0242499	608.948	0.0441505	608.948	0.0291907	608.948	0.0541043	608.948	0.0357776	608.948	0.0515859	608.948	0.0322077	608.948	0.0545934
608.061	0.00796705	608.061	0.0396755	608.061	0.0249538	608.061	0.0394189	608.061	0.022168	608.061	0.045067	608.061	0.0245261	608.061	0.0326751	608.061	0.149044	608.061	0.0204117	608.061	0.0416047	608.061	0.0235302	608.061	0.0386877	608.061	0.023834	608.061	0.0608943	608.061	0.0267486	608.061	0.0495701	608.061	0.0243525	608.061	0.0443473	608.061	0.0287397	608.061	0.0544035	608.061	0.0358999	608.061	0.0521223	608.061	0.0323032	608.061	0.0548352
607.025	0.00795817	607.025	0.040345	607.025	0.025099	607.025	0.0398386	607.025	0.0223345	607.025	0.0455478	607.025	0.0244356	607.025	0.0331569	607.025	0.144644	607.025	0.0203474	607.025	0.0419589	607.025	0.0236732	607.025	0.0389138	607.025	0.0240256	607.025	0.0609271	607.025	0.0268332	607.025	0.0496625	607.025	0.0242581	607.025	0.0448386	607.025	0.0289934	607.025	0.0550716	607.025	0.0356745	607.025	0.0524705	607.025	0.0321691	607.025	0.0554815
605.989	0.00808769	605.989	0.0407925	605.989	0.0251037	605.989	0.0400842	605.989	0.0222421	605.989	0.045884	605.989	0.0243301	605.989	0.0333963	605.989	0.1429	605.989	0.0207032	605.989	0.0422741	605.989	0.0239288	605.989	0.0391928	605.989	0.0237371	605.989	0.0609053	605.989	0.0268924	605.989	0.049833	605.989	0.024253	605.989	0.0453293	605.989	0.0288078	605.989	0.0551661	605.989	0.035637	605.989	0.0529626	605.989	0.0321387	605.989	0.0559437
604.953	0.00785143	604.953	0.0408603	604.953	0.0249423	604.953	0.040272	604.953	0.0221962	604.953	0.0459876	604.953	0.0242623	604.953	0.0333749	604.953	0.15177	604.953	0.0206136	604.953	0.0421964	604.953	0.0236762	604.953	0.0393047	604.953	0.0237443	604.953	0.0607353	604.953	0.0265431	604.953	0.049842	604.953	0.0241357	604.953	0.0452337	604.953	0.0286591	604.953	0.0553635	604.953	0.0353919	604.953	0.0531317	604.953	0.0320032	604.953	0.0560481
604.065	0.00772058	604.065	0.041098	604.065	0.0250437	604.065	0.04061	604.065	0.0222702	604.065	0.0458263	604.065	0.0240674	604.065	0.0333434	604.065	0.153155	604.065	0.0203369	604.065	0.0423466	604.065	0.0235542	604.065	0.0391977	604.065	0.0235374	604.065	0.0608217	604.065	0.0265185	604.065	0.0499177	604.065	0.0241734	604.065	0.0454753	604.065	0.0283916	604.065	0.0558039	604.065	0.035451	604.065	0.0535675	604.065	0.0318355	604.065	0.0565658
603.029	0.00760112	603.029	0.0416655	603.029	0.0248848	603.029	0.0408765	603.029	0.0219404	603.029	0.0468112	603.029	0.0240638	603.029	0.0335118	603.029	0.154119	603.029	0.0203991	603.029	0.0428268	603.029	0.023517	603.029	0.0395354	603.029	0.0235918	603.029	0.0611538	603.029	0.0265842	603.029	0.0498371	603.029	0.0239881	603.029	0.0460273	603.029	0.0285727	603.029	0.0564588	603.029	0.0353698	603.029	0.0542437	603.029	0.0317194	603.029	0.0570346
601.992	0.00742679	601.992	0.0420579	601.992	0.0251337	601.992	0.0412482	601.992	0.0221287	601.992	0.0473374	601.992	0.0241543	601.992	0.0341534	601.992	0.152872	601.992	0.020537	601.992	0.0431084	601.992	0.0238939	601.992	0.0397805	601.992	0.023714	601.992	0.0617974	601.992	0.0265787	601.992	0.0503649	601.992	0.0242201	601.992	0.0464139	601.992	0.0286297	601.992	0.0570229	601.992	0.035484	601.992	0.0546906	601.992	0.0318518	601.992	0.0575674
600.955	0.00735009	600.955	0.0426017	600.955	0.0250224	600.955	0.0418215	600.955	0.0219	600.955	0.0474308	600.955	0.0240541	600.955	0.0341754	600.955	0.151486	600.955	0.0207519	600.955	0.0432635	600.955	0.0235906	600.955	0.0399336	600.955	0.0239487	600.955	0.0621942	600.955	0.0265346	600.955	0.0502226	600.955	0.0241082	600.955	0.0470879	600.955	0.0286699	600.955	0.0576645	600.955	0.0354246	600.955	0.0552913	600.955	0.0316765	600.955	0.0577852
600.065	0.00736381	600.065	0.042783	600.065	0.0248587	600.065	0.0419588	600.065	0.0220543	600.065	0.0478072	600.065	0.0242037	600.065	0.0342621	600.065	0.148232	600.065	0.0207839	600.065	0.0433318	600.065	0.023823	600.065	0.0401754	600.065	0.0239363	600.065	0.0624777	600.065	0.0266662	600.065	0.0502241	600.065	0.0241846	600.065	0.047128	600.065	0.028473	600.065	0.058038	600.065	0.0354127	600.065	0.0556715	600.065	0.0320627	600.065	0.0584906
599.028	0.00721526	599.028	0.0432822	599.028	0.0248883	599.028	0.0427947	599.028	0.0220276	599.028	0.0485319	599.028	0.0238896	599.028	0.0344873	599.028	0.146956	599.028	0.0206773	599.028	0.0437849	599.028	0.0239307	599.028	0.0403975	599.028	0.0239652	599.028	0.062893	599.028	0.0269052	599.028	0.0506624	599.028	0.0244999	599.028	0.0476205	599.028	0.0288391	599.028	0.0589213	599.028	0.0356293	599.028	0.0563129	599.028	0.0319178	599.028	0.0590551
597.99	0.00714815	597.99	0.0438304	597.99	0.0246605	597.99	0.0428291	597.99	0.0216762	597.99	0.0489318	597.99	0.0238859	597.99	0.0347603	597.99	0.146401	597.99	0.0206869	597.99	0.0441869	597.99	0.0236965	597.99	0.040664	597.99	0.0239561	597.99	0.0636322	597.99	0.02713	597.99	0.0508461	597.99	0.0243442	597.99	0.0486541	597.99	0.0287948	597.99	0.0598461	597.99	0.0358335	597.99	0.0567375	597.99	0.0321467	597.99	0.0601105
596.952	0.00678818	596.952	0.0442189	596.952	0.0246202	596.952	0.0431954	596.952	0.0216012	596.952	0.049366	596.952	0.0234219	596.952	0.0347027	596.952	0.155389	596.952	0.02061	596.952	0.0441043	596.952	0.0235981	596.952	0.040216	596.952	0.0237716	596.952	0.0637792	596.952	0.0270447	596.952	0.051058	596.952	0.024346	596.952	0.0486889	596.952	0.0286389	596.952	0.0603627	596.952	0.0356805	596.952	0.0573161	596.952	0.032222	596.952	0.0602669
596.061	0.00644597	596.061	0.0444338	596.061	0.0246284	596.061	0.0436554	596.061	0.0214673	596.061	0.0497581	596.061	0.0232996	596.061	0.0348789	596.061	0.150316	596.061	0.0205189	596.061	0.0444201	596.061	0.023565	596.061	0.0409701	596.061	0.0238269	596.061	0.064118	596.061	0.0269587	596.061	0.0510534	596.061	0.0244407	596.061	0.049257	596.061	0.0288073	596.061	0.0608282	596.061	0.0355817	596.061	0.058102	596.061	0.0322643	596.061	0.0610412
595.023	0.00657409	595.023	0.0450348	595.023	0.0245422	595.023	0.0440189	595.023	0.021441	595.023	0.0503517	595.023	0.0232475	595.023	0.0353064	595.023	0.150707	595.023	0.0203379	595.023	0.0444709	595.023	0.0234121	595.023	0.041141	595.023	0.0239065	595.023	0.0646927	595.023	0.0271764	595.023	0.0514161	595.023	0.0243823	595.023	0.0499308	595.023	0.028715	595.023	0.0617898	595.023	0.0358437	595.023	0.0585485	595.023	0.032564	595.023	0.0616549
593.984	0.00640125	593.984	0.0455427	593.984	0.0243208	593.984	0.0442524	593.984	0.0215092	593.984	0.0511005	593.984	0.0233335	593.984	0.0353225	593.984	0.151158	593.984	0.0205195	593.984	0.0448942	593.984	0.0232577	593.984	0.0412253	593.984	0.023878	593.984	0.0651749	593.984	0.0272808	593.984	0.0516898	593.984	0.0245379	593.984	0.0504447	593.984	0.0290317	593.984	0.062419	593.984	0.0361094	593.984	0.0596981	593.984	0.0327555	593.984	0.0623227
592.944	0.00613689	592.944	0.0461329	592.944	0.0243107	592.944	0.0448157	592.944	0.0215225	592.944	0.0519696	592.944	0.0231684	592.944	0.035624	592.944	0.149431	592.944	0.020443	592.944	0.0452623	592.944	0.0231944	592.944	0.0415809	592.944	0.0236664	592.944	0.0656893	592.944	0.0276583	592.944	0.0522948	592.944	0.0249454	592.944	0.0513139	592.944	0.0292088	592.944	0.0635129	592.944	0.03657	592.944	0.0604108	592.944	0.0327276	592.944	0.0633997
592.053	0.00607995	592.053	0.0469544	592.053	0.0242848	592.053	0.0454672	592.053	0.0214604	592.053	0.052929	592.053	0.0233067	592.053	0.0356522	592.053	0.149374	592.053	0.0204387	592.053	0.0454762	592.053	0.023567	592.053	0.0418606	592.053	0.0237107	592.053	0.0663492	592.053	0.0281129	592.053	0.0527483	592.053	0.0248486	592.053	0.0518558	592.053	0.0296859	592.053	0.0643184	592.053	0.0364859	592.053	0.0615487	592.053	0.0328157	592.053	0.0643166
591.013	0.00560321	591.013	0.0474432	591.013	0.0243986	591.013	0.0460859	591.013	0.0212907	591.013	0.0534426	591.013	0.0230094	591.013	0.0359337	591.013	0.149099	591.013	0.0205587	591.013	0.0459623	591.013	0.0232453	591.013	0.0421077	591.013	0.023784	591.013	0.0669324	591.013	0.0279291	591.013	0.0531978	591.013	0.0249169	591.013	0.0525332	591.013	0.0294709	591.013	0.0654909	591.013	0.0367007	591.013	0.0621487	591.013	0.0331533	591.013	0.0650483
589.973	0.00555121	589.973	0.048009	589.973	0.0243478	589.973	0.0466018	589.973	0.0211502	589.973	0.0540795	589.973	0.0229052	589.973	0.0359998	589.973	0.150141	589.973	0.020485	589.973	0.0461197	589.973	0.0232408	589.973	0.0421957	589.973	0.0237038	589.973	0.0675943	589.973	0.0282583	589.973	0.0533474	589.973	0.0251768	589.973	0.0531202	589.973	0.0294987	589.973	0.0664565	589.973	0.0369856	589.973	0.0631496	589.973	0.033403	589.973	0.0658016
588.933	0.00525158	588.933	0.0487647	588.933	0.0240572	588.933	0.0472778	588.933	0.0211013	588.933	0.0552468	588.933	0.0229527	588.933	0.0366337	588.933	0.150057	588.933	0.0202915	588.933	0.0463479	588.933	0.0230101	588.933	0.0425298	588.933	0.0237345	588.933	0.0678852	588.933	0.0283678	588.933	0.0538373	588.933	0.025125	588.933	0.053924	588.933	0.0294331	588.933	0.0676279	588.933	0.0367245	588.933	0.0643484	588.933	0.0335217	588.933	0.0670359
588.041	0.00509825	588.041	0.0495624	588.041	0.024277	588.041	0.0475106	588.041	0.0211112	588.041	0.055715	588.041	0.0228097	588.041	0.036723	588.041	0.148913	588.041	0.0206319	588.041	0.0464985	588.041	0.023159	588.041	0.0429914	588.041	0.023773	588.041	0.0684293	588.041	0.0283696	588.041	0.0538304	588.041	0.0249599	588.041	0.0541968	588.041	0.0297838	588.041	0.0684084	588.041	0.0371127	588.041	0.0653568	588.041	0.0338918	588.041	0.0679817
587	0.00503055	587	0.0503251	587	0.0239871	587	0.0484272	587	0.0210343	587	0.056522	587	0.0224709	587	0.036834	587	0.149003	587	0.0205016	587	0.0468406	587	0.0229224	587	0.0432607	587	0.0235824	587	0.0691894	587	0.0285461	587	0.0545442	587	0.0250485	587	0.0551451	587	0.0297159	587	0.0697652	587	0.0373044	587	0.0665115	587	0.0341241	587	0.0691594
585.959	0.00471663	585.959	0.0509654	585.959	0.0241502	585.959	0.0487487	585.959	0.0211239	585.959	0.0577328	585.959	0.0227754	585.959	0.0369129	585.959	0.150411	585.959	0.020418	585.959	0.0472031	585.959	0.0232405	585.959	0.043248	585.959	0.0236202	585.959	0.0702621	585.959	0.0290348	585.959	0.0550662	585.959	0.025179	585.959	0.0558366	585.959	0.0298276	585.959	0.0706675	585.959	0.0375712	585.959	0.0673581	585.959	0.0342532	585.959	0.0703596
585.066	0.00463423	585.066	0.0519472	585.066	0.024087	585.066	0.0497363	585.066	0.0210986	585.066	0.0583696	585.066	0.0223916	585.066	0.0370844	585.066	0.146516	585.066	0.0205256	585.066	0.047701	585.066	0.0231524	585.066	0.0435433	585.066	0.0235362	585.066	0.070707	585.066	0.0290233	585.066	0.0553532	585.066	0.0251089	585.066	0.0566263	585.066	0.0301073	585.066	0.0721909	585.066	0.0378223	585.066	0.0685791	585.066	0.0345046	585.066	0.0714786
584.025	0.00419626	584.025	0.0529011	584.025	0.0239228	584.025	0.050562	584.025	0.0209083	584.025	0.0595653	584.025	0.0225295	584.025	0.0374726	584.025	0.150233	584.025	0.0204984	584.025	0.0481007	584.025	0.0228814	584.025	0.0440297	584.025	0.0234261	584.025	0.0714027	584.025	0.0291661	584.025	0.0560619	584.025	0.0252329	584.025	0.0576954	584.025	0.0300969	584.025	0.0733141	584.025	0.0382743	584.025	0.070045	584.025	0.0349064	584.025	0.0730618
582.983	0.0039537	582.983	0.0538989	582.983	0.0241222	582.983	0.051222	582.983	0.0208676	582.983	0.0607639	582.983	0.0224387	582.983	0.0375191	582.983	0.149378	582.983	0.0204071	582.983	0.0484639	582.983	0.0230169	582.983	0.0441978	582.983	0.0236031	582.983	0.0724117	582.983	0.0294083	582.983	0.0566895	582.983	0.0253883	582.983	0.0581414	582.983	0.0300818	582.983	0.0751018	582.983	0.0384269	582.983	0.0714718	582.983	0.0353024	582.983	0.0744147
581.94	0.00369936	581.94	0.0549294	581.94	0.0237828	581.94	0.0519633	581.94	0.0209025	581.94	0.0617486	581.94	0.0224563	581.94	0.037578	581.94	0.149052	581.94	0.0203707	581.94	0.0488818	581.94	0.0228798	581.94	0.0445726	581.94	0.0236597	581.94	0.0730191	581.94	0.0295471	581.94	0.0570191	581.94	0.025231	581.94	0.0590349	581.94	0.0305201	581.94	0.0760817	581.94	0.0389952	581.94	0.0729012	581.94	0.0356081	581.94	0.0760003
581.047	0.00343792	581.047	0.0551099	581.047	0.0240014	581.047	0.0522462	581.047	0.0208175	581.047	0.0623072	581.047	0.0224407	581.047	0.0377008	581.047	0.150289	581.047	0.0204669	581.047	0.0492889	581.047	0.0227943	581.047	0.0448967	581.047	0.0235618	581.047	0.0736787	581.047	0.0298926	581.047	0.0576304	581.047	0.0252595	581.047	0.059704	581.047	0.0303988	581.047	0.0774122	581.047	0.0391579	581.047	0.0736645	581.047	0.0360862	581.047	0.077137
580.004	0.00310178	580.004	0.0564671	580.004	0.0241613	580.004	0.053045	580.004	0.020692	580.004	0.0635123	580.004	0.0224471	580.004	0.0379856	580.004	0.148223	580.004	0.0207856	580.004	0.0494336	580.004	0.0230493	580.004	0.0450299	580.004	0.0236491	580.004	0.0746542	580.004	0.0299542	580.004	0.0579553	580.004	0.025573	580.004	0.0606652	580.004	0.0309166	580.004	0.0789692	580.004	0.0395827	580.004	0.0749737	580.004	0.0365054	580.004	0.0787835
578.961	0.00282041	578.961	0.0574452	578.961	0.0242323	578.961	0.0540311	578.961	0.020858	578.961	0.0649888	578.961	0.0224303	578.961	0.0381837	578.961	0.147518	578.961	0.0205173	578.961	0.0498661	578.961	0.0229344	578.961	0.0454054	578.961	0.023506	578.961	0.0755351	578.961	0.0303499	578.961	0.0588484	578.961	0.0254384	578.961	0.061584	578.961	0.0310305	578.961	0.0804021	578.961	0.0399078	578.961	0.076727	578.961	0.0370054	578.961	0.080521
578.067	0.00246483	578.067	0.0581686	578.067	0.0239493	578.067	0.0544327	578.067	0.0209532	578.067	0.0657091	578.067	0.022484	578.067	0.0380586	578.067	0.148333	578.067	0.0206533	578.067	0.0500853	578.067	0.0228887	578.067	0.0457065	578.067	0.0237714	578.067	0.0762288	578.067	0.0306405	578.067	0.0592996	578.067	0.0256174	578.067	0.0620445	578.067	0.0312767	578.067	0.0815851	578.067	0.0405774	578.067	0.0780394	578.067	0.0374647	578.067	0.0815523
577.023	0.00212153	577.023	0.0588471	577.023	0.0242096	577.023	0.0551919	577.023	0.0209672	577.023	0.066678	577.023	0.022512	577.023	0.0382494	577.023	0.149707	577.023	0.0205924	577.023	0.0504342	577.023	0.023027	577.023	0.0458031	577.023	0.0236782	577.023	0.0770635	577.023	0.0311301	577.023	0.0599224	577.023	0.0258027	577.023	0.0627188	577.023	0.0317236	577.023	0.0828777	577.023	0.0412047	577.023	0.0793654	577.023	0.037952	577.023	0.083275
575.98	0.00179961	575.98	0.0597089	575.98	0.0244506	575.98	0.05557	575.98	0.0209259	575.98	0.0672789	575.98	0.022722	575.98	0.0381989	575.98	0.150326	575.98	0.0206097	575.98	0.0504093	575.98	0.0231164	575.98	0.0459812	575.98	0.0236285	575.98	0.0775782	575.98	0.0314746	575.98	0.0602621	575.98	0.0259628	575.98	0.0632953	575.98	0.0318083	575.98	0.0839926	575.98	0.0416118	575.98	0.0800694	575.98	0.0384507	575.98	0.0842406
574.936	0.00101685	574.936	0.0595009	574.936	0.0240867	574.936	0.0555794	574.936	0.0206345	574.936	0.0676704	574.936	0.0222835	574.936	0.0377909	574.936	0.149878	574.936	0.0203498	574.936	0.0501125	574.936	0.0225488	574.936	0.0456039	574.936	0.023236	574.936	0.0779816	574.936	0.0314584	574.936	0.0603771	574.936	0.0257372	574.936	0.0632762	574.936	0.0317313	574.936	0.08479	574.936	0.0418231	574.936	0.0807614	574.936	0.0384135	574.936	0.0850265
574.04	0.000528965	574.04	0.0602662	574.04	0.0245817	574.04	0.0561825	574.04	0.0207829	574.04	0.0683737	574.04	0.0228295	574.04	0.0380337	574.04	0.150183	574.04	0.020521	574.04	0.0504551	574.04	0.0228237	574.04	0.0459779	574.04	0.0234372	574.04	0.0784208	574.04	0.0321388	574.04	0.0609756	574.04	0.0260653	574.04	0.0640165	574.04	0.0322945	574.04	0.0857955	574.04	0.0426205	574.04	0.0817563	574.04	0.0393209	574.04	0.0860738
572.996	0.000287896	572.996	0.0607448	572.996	0.0247676	572.996	0.0566009	572.996	0.0211236	572.996	0.0692353	572.996	0.0228599	572.996	0.0378897	572.996	0.149139	572.996	0.0207532	572.996	0.050513	572.996	0.0231159	572.996	0.0459114	572.996	0.0237787	572.996	0.0789332	572.996	0.0328939	572.996	0.0616049	572.996	0.0264327	572.996	0.0645781	572.996	0.0328929	572.996	0.0866765	572.996	0.0433517	572.996	0.0825771	572.996	0.0401317	572.996	0.0873079
571.951	-0.0002059	571.951	0.0613086	571.951	0.0252004	571.951	0.0570922	571.951	0.0214735	571.951	0.0696048	571.951	0.0234308	571.951	0.0379128	571.951	0.157538	571.951	0.0207451	571.951	0.0504169	571.951	0.0232091	571.951	0.0461015	571.951	0.0239514	571.951	0.0793718	571.951	0.033784	571.951	0.0620054	571.951	0.0267969	571.951	0.0646968	571.951	0.0335366	571.951	0.087431	571.951	0.0439669	571.951	0.0831256	571.951	0.0409848	571.951	0.0879356
571.055	-0.000320402	571.055	0.0617086	571.055	0.0258181	571.055	0.0572254	571.055	0.0219441	571.055	0.0701531	571.055	0.0239358	571.055	0.0378747	571.055	0.154971	571.055	0.0210292	571.055	0.0505012	571.055	0.0237535	571.055	0.0460713	571.055	0.0243286	571.055	0.0796212	571.055	0.0345892	571.055	0.0622589	571.055	0.0272452	571.055	0.0653217	571.055	0.0342488	571.055	0.0881008	571.055	0.0450364	571.055	0.0838321	571.055	0.0417824	571.055	0.0884184
570.01	-0.000368718	570.01	0.0627411	570.01	0.0270609	570.01	0.0582026	570.01	0.0232198	570.01	0.071005	570.01	0.0253946	570.01	0.0384319	570.01	0.15536	570.01	0.0221908	570.01	0.0509143	570.01	0.0245711	570.01	0.0466815	570.01	0.025532	570.01	0.0806157	570.01	0.0365151	570.01	0.0632349	570.01	0.028734	570.01	0.0661169	570.01	0.0358961	570.01	0.0894035	570.01	0.0467692	570.01	0.0850797	570.01	0.0437833	570.01	0.0898429
568.964	-0.000843787	568.964	0.0629263	568.964	0.0282038	568.964	0.0583793	568.964	0.0240986	568.964	0.0712903	568.964	0.0263153	568.964	0.0383898	568.964	0.154278	568.964	0.0227229	568.964	0.0509419	568.964	0.0253436	568.964	0.0465857	568.964	0.0261145	568.964	0.0810007	568.964	0.0383219	568.964	0.063641	568.964	0.0298405	568.964	0.0664837	568.964	0.0373504	568.964	0.0901347	568.964	0.0486024	568.964	0.0857391	568.964	0.0456209	568.964	0.0905132
568.068	-0.00090119	568.068	0.0633894	568.068	0.0298028	568.068	0.0589141	568.068	0.0254406	568.068	0.0720307	568.068	0.0277435	568.068	0.0383516	568.068	0.15203	568.068	0.0235384	568.068	0.0509078	568.068	0.0262804	568.068	0.0469641	568.068	0.0270157	568.068	0.0810826	568.068	0.0405431	568.068	0.0638378	568.068	0.0311923	568.068	0.0670896	568.068	0.0390038	568.068	0.0904364	568.068	0.0506597	568.068	0.086107	568.068	0.0474976	568.068	0.09101
567.022	-0.00119697	567.022	0.0634977	567.022	0.0313701	567.022	0.0588494	567.022	0.0269309	567.022	0.072385	567.022	0.0295908	567.022	0.0383441	567.022	0.155339	567.022	0.02442	567.022	0.0508997	567.022	0.0274905	567.022	0.0468996	567.022	0.0281857	567.022	0.0813429	567.022	0.0431983	567.022	0.0639727	567.022	0.0327373	567.022	0.0672679	567.022	0.0413956	567.022	0.0908129	567.022	0.0534376	567.022	0.0864587	567.022	0.0504019	567.022	0.0914631
565.975	-0.00153486	565.975	0.063749	565.975	0.0336636	565.975	0.0590524	565.975	0.0287321	565.975	0.0726465	565.975	0.0316579	565.975	0.0383668	565.975	0.161181	565.975	0.0254403	565.975	0.0505383	565.975	0.0288285	565.975	0.0469216	565.975	0.0292537	565.975	0.0813506	565.975	0.0463442	565.975	0.0640866	565.975	0.0348936	565.975	0.0673356	565.975	0.0441494	565.975	0.0909894	565.975	0.056737	565.975	0.0868719	565.975	0.0537071	565.975	0.0918038
564.929	-0.00174462	564.929	0.0639296	564.929	0.0371996	564.929	0.0593814	564.929	0.0319283	564.929	0.0730833	564.929	0.0353955	564.929	0.0384251	564.929	0.159663	564.929	0.0272199	564.929	0.0507454	564.929	0.0310447	564.929	0.0470891	564.929	0.0313422	564.929	0.0816837	564.929	0.0513085	564.929	0.0643847	564.929	0.0380024	564.929	0.0674243	564.929	0.0483021	564.929	0.0912681	564.929	0.0612594	564.929	0.0870517	564.929	0.0583963	564.929	0.0919278
564.031	-0.00192269	564.031	0.0642321	564.031	0.0402531	564.031	0.0596179	564.031	0.0347368	564.031	0.0733061	564.031	0.0385636	564.031	0.0385353	564.031	0.161184	564.031	0.0288083	564.031	0.0510029	564.031	0.0330652	564.031	0.0472951	564.031	0.0331434	564.031	0.0817072	564.031	0.0553557	564.031	0.0643112	564.031	0.0408601	564.031	0.0675672	564.031	0.0520812	564.031	0.0913175	564.031	0.0654565	564.031	0.0875007	564.031	0.0623801	564.031	0.0920006
562.984	-0.00212124	562.984	0.0645855	562.984	0.0446739	562.984	0.0600703	562.984	0.038338	562.984	0.0739751	562.984	0.0428928	562.984	0.0385507	562.984	0.161556	562.984	0.0310757	562.984	0.0511632	562.984	0.0359387	562.984	0.0475203	562.984	0.0359388	562.984	0.0817838	562.984	0.0609258	562.984	0.064495	562.984	0.044644	562.984	0.0677288	562.984	0.056925	562.984	0.0913483	562.984	0.0708502	562.984	0.0875841	562.984	0.0681744	562.984	0.0921917
561.937	-0.00230075	561.937	0.0649475	561.937	0.0496098	561.937	0.0604107	561.937	0.0425693	561.937	0.0742982	561.937	0.0481153	561.937	0.0387963	561.937	0.164315	561.937	0.033416	561.937	0.0511563	561.937	0.0389807	561.937	0.0477542	561.937	0.0386045	561.937	0.0817022	561.937	0.067007	561.937	0.0645743	561.937	0.0486201	561.937	0.0677272	561.937	0.0622165	561.937	0.0914627	561.937	0.0770713	561.937	0.0877245	561.937	0.0743095	561.937	0.0921499
561.039	-0.00264215	561.039	0.0652816	561.039	0.0558172	561.039	0.0605714	561.039	0.047949	561.039	0.0749259	561.039	0.0543661	561.039	0.0388507	561.039	0.16959	561.039	0.0362202	561.039	0.0512976	561.039	0.0426776	561.039	0.0479946	561.039	0.0421349	561.039	0.0819532	561.039	0.0743917	561.039	0.0646733	561.039	0.0535704	561.039	0.0679469	561.039	0.0685053	561.039	0.0915089	561.039	0.0844124	561.039	0.087709	561.039	0.0819361	561.039	0.0921738
559.991	-0.00258719	559.991	0.0659484	559.991	0.0637084	559.991	0.0611287	559.991	0.0550635	559.991	0.0755021	559.991	0.0630263	559.991	0.0393266	559.991	0.17213	559.991	0.0397219	559.991	0.0516938	559.991	0.047519	559.991	0.0484454	559.991	0.0465075	559.991	0.0819149	559.991	0.0834916	559.991	0.0651	559.991	0.0597581	559.991	0.0681535	559.991	0.0763115	559.991	0.0915426	559.991	0.0940682	559.991	0.0879606	559.991	0.0919111	559.991	0.0923713
558.943	-0.00263032	558.943	0.0662805	558.943	0.0723762	558.943	0.0616378	558.943	0.0621269	558.943	0.0760577	558.943	0.0720701	558.943	0.0393932	558.943	0.176199	558.943	0.0434797	558.943	0.0520064	558.943	0.0521327	558.943	0.0487531	558.943	0.0510303	558.943	0.0822026	558.943	0.0918107	558.943	0.0653503	558.943	0.0656355	558.943	0.0687261	558.943	0.0840695	558.943	0.0917841	558.943	0.103816	558.943	0.0885368	558.943	0.101849	558.943	0.0928267
558.044	-0.00265471	558.044	0.066923	558.044	0.0803014	558.044	0.0622513	558.044	0.0693924	558.044	0.076578	558.044	0.0807013	558.044	0.0399871	558.044	0.179191	558.044	0.0465292	558.044	0.0522094	558.044	0.0563562	558.044	0.0493832	558.044	0.0549775	558.044	0.0824834	558.044	0.0999092	558.044	0.0658343	558.044	0.0708999	558.044	0.0690821	558.044	0.0906008	558.044	0.0923476	558.044	0.112712	558.044	0.0888374	558.044	0.110948	558.044	0.093378
556.995	-0.00263073	556.995	0.0674284	556.995	0.091075	556.995	0.0628567	556.995	0.0786788	556.995	0.0772885	556.995	0.0924422	556.995	0.0399884	556.995	0.183411	556.995	0.0506149	556.995	0.0526568	556.995	0.0617449	556.995	0.0497533	556.995	0.0603212	556.995	0.0830799	556.995	0.109045	556.995	0.0662453	556.995	0.0775701	556.995	0.0693118	556.995	0.0990474	556.995	0.0927121	556.995	0.124222	556.995	0.0894238	556.995	0.123082	556.995	0.0934455
555.947	-0.00247699	555.947	0.0682701	555.947	0.10637	555.947	0.0635272	555.947	0.0920048	555.947	0.0784112	555.947	0.109207	555.947	0.0406189	555.947	0.190756	555.947	0.055927	555.947	0.0531504	555.947	0.0691921	555.947	0.0505369	555.947	0.0674269	555.947	0.0835798	555.947	0.121722	555.947	0.0670045	555.947	0.086336	555.947	0.0699951	555.947	0.109744	555.947	0.0933845	555.947	0.139484	555.947	0.0899807	555.947	0.139565	555.947	0.0945203
555.047	-0.00283322	555.047	0.0688393	555.047	0.125108	555.047	0.0642392	555.047	0.108036	555.047	0.0790563	555.047	0.13037	555.047	0.0407429	555.047	0.194673	555.047	0.0621219	555.047	0.0533368	555.047	0.0778454	555.047	0.0508117	555.047	0.0758852	555.047	0.083902	555.047	0.136058	555.047	0.0676569	555.047	0.0963341	555.047	0.0705053	555.047	0.122464	555.047	0.094032	555.047	0.158784	555.047	0.0906666	555.047	0.159903	555.047	0.0949512
553.998	-0.00261308	553.998	0.0697638	553.998	0.144668	553.998	0.0652256	553.998	0.125053	553.998	0.0801394	553.998	0.152643	553.998	0.0413039	553.998	0.198072	553.998	0.0685254	553.998	0.0539608	553.998	0.0866107	553.998	0.051479	553.998	0.0847643	553.998	0.0847731	553.998	0.150603	553.998	0.0685308	553.998	0.106746	553.998	0.0715735	553.998	0.135478	553.998	0.0949882	553.998	0.177825	553.998	0.0919423	553.998	0.180111	553.998	0.0963103
552.948	-0.00254473	552.948	0.0708926	552.948	0.163231	552.948	0.0662797	552.948	0.140942	552.948	0.0809906	552.948	0.173316	552.948	0.0418355	552.948	0.211359	552.948	0.0744347	552.948	0.05458	552.948	0.0947733	552.948	0.0521668	552.948	0.0926393	552.948	0.0855347	552.948	0.163679	552.948	0.0692833	552.948	0.116075	552.948	0.0721604	552.948	0.147007	552.948	0.0963825	552.948	0.195758	552.948	0.0928507	552.948	0.199195	552.948	0.0972528
552.048	-0.00235492	552.048	0.0717465	552.048	0.17635	552.048	0.0672046	552.048	0.152233	552.048	0.0822491	552.048	0.187816	552.048	0.0422273	552.048	0.215884	552.048	0.0785238	552.048	0.0551873	552.048	0.100269	552.048	0.0531312	552.048	0.0984802	552.048	0.0864731	552.048	0.172017	552.048	0.0701701	552.048	0.122303	552.048	0.0729238	552.048	0.154457	552.048	0.0974118	552.048	0.207607	552.048	0.0941509	552.048	0.211795	552.048	0.0986409
550.998	-0.00202107	550.998	0.0727731	550.998	0.187901	550.998	0.0685536	550.998	0.162375	550.998	0.0835312	550.998	0.201523	550.998	0.043021	550.998	0.216491	550.998	0.0823971	550.998	0.0562091	550.998	0.105366	550.998	0.0539909	550.998	0.103831	550.998	0.0877012	550.998	0.179479	550.998	0.0712896	550.998	0.127651	550.998	0.0743524	550.998	0.161062	550.998	0.0991796	550.998	0.218386	550.998	0.0958697	550.998	0.223807	550.998	0.100374
549.948	-0.0017174	549.948	0.0743993	549.948	0.191555	549.948	0.0699183	549.948	0.165648	549.948	0.085323	549.948	0.206012	549.948	0.0439777	549.948	0.217452	549.948	0.0836623	549.948	0.0572566	549.948	0.107007	549.948	0.0553532	549.948	0.105436	549.948	0.0891842	549.948	0.18027	549.948	0.0728868	549.948	0.129072	549.948	0.075843	549.948	0.162013	549.948	0.101037	549.948	0.221213	549.948	0.0976343	549.948	0.226709	549.948	0.102601
549.047	-0.0010433	549.047	0.07579	549.047	0.187719	549.047	0.0715088	549.047	0.162503	549.047	0.0867467	549.047	0.201908	549.047	0.0448032	549.047	0.213342	549.047	0.0827957	549.047	0.0584194	549.047	0.105293	549.047	0.056382	549.047	0.103967	549.047	0.0908269	549.047	0.176151	549.047	0.0743293	549.047	0.126092	549.047	0.0774521	549.047	0.158256	549.047	0.103101	549.047	0.21648	549.047	0.0996011	549.047	0.222204	549.047	0.104736
547.996	-0.000802965	547.996	0.0773851	547.996	0.177513	547.996	0.0728355	547.996	0.153747	547.996	0.0883778	547.996	0.190646	547.996	0.0457912	547.996	0.211774	547.996	0.0796121	547.996	0.0596661	547.996	0.101011	547.996	0.0576452	547.996	0.0998531	547.996	0.0922724	547.996	0.167101	547.996	0.0757056	547.996	0.120116	547.996	0.0788364	547.996	0.150474	547.996	0.105106	547.996	0.206039	547.996	0.101556	547.996	0.210891	547.996	0.106957
546.945	-0.000403685	546.945	0.0784885	546.945	0.163304	546.945	0.0741187	546.945	0.141092	546.945	0.0897827	546.945	0.174665	546.945	0.0463033	546.945	0.21009	546.945	0.0753715	546.945	0.0605698	546.945	0.0942644	546.945	0.0584821	546.945	0.0938012	546.945	0.0936599	546.945	0.155474	546.945	0.0770737	546.945	0.111942	546.945	0.0801548	546.945	0.139698	546.945	0.107478	546.945	0.191443	546.945	0.103576	546.945	0.19557	546.945	0.109344
546.044	-6.3679e-06	546.044	0.0800779	546.044	0.147633	546.044	0.0754608	546.044	0.127996	546.044	0.0913415	546.044	0.157704	546.044	0.0473078	546.044	0.208127	546.044	0.0705898	546.044	0.0616959	546.044	0.0876591	546.044	0.0594977	546.044	0.0873385	546.044	0.0951858	546.044	0.142924	546.044	0.0784425	546.044	0.103645	546.044	0.0816997	546.044	0.129073	546.044	0.10963	546.044	0.176524	546.044	0.105593	546.044	0.179497	546.044	0.111619
544.992	0.000747246	544.992	0.0817088	544.992	0.130054	544.992	0.0772637	544.992	0.113103	544.992	0.0933428	544.992	0.138033	544.992	0.0485769	544.992	0.197496	544.992	0.0657561	544.992	0.0629221	544.992	0.0803426	544.992	0.0608591	544.992	0.0800386	544.992	0.0973072	544.992	0.129387	544.992	0.0805571	544.992	0.0942756	544.992	0.0839012	544.992	0.11714	544.992	0.112233	544.992	0.159415	544.992	0.107972	544.992	0.161602	544.992	0.114449
543.94	0.00127087	543.94	0.0830718	543.94	0.115929	543.94	0.0784659	543.94	0.100658	543.94	0.0949586	543.94	0.121792	543.94	0.0494101	543.94	0.192834	543.94	0.0616995	543.94	0.0641517	543.94	0.0742205	543.94	0.0621213	543.94	0.0745197	543.94	0.0989306	543.94	0.118538	543.94	0.0820979	543.94	0.0868939	543.94	0.0854136	543.94	0.107439	543.94	0.114639	543.94	0.145723	543.94	0.110245	543.94	0.14712	543.94	0.117127
543.039	0.00209097	543.039	0.0849232	543.039	0.105307	543.039	0.0802931	543.039	0.0915703	543.039	0.0968889	543.039	0.110027	543.039	0.0506167	543.039	0.188664	543.039	0.0590934	543.039	0.0656154	543.039	0.0700936	543.039	0.0634119	543.039	0.0705438	543.039	0.101069	543.039	0.110974	543.039	0.0842213	543.039	0.0819098	543.039	0.0875014	543.039	0.100571	543.039	0.117334	543.039	0.136061	543.039	0.112794	543.039	0.136602	543.039	0.120166
541.986	0.00251474	541.986	0.0863178	541.986	0.0973833	541.986	0.0816204	541.986	0.0848569	541.986	0.0985157	541.986	0.101278	541.986	0.0515396	541.986	0.189963	541.986	0.0571063	541.986	0.0666672	541.986	0.0668016	541.986	0.064355	541.986	0.0674451	541.986	0.10266	541.986	0.10525	541.986	0.0855752	541.986	0.0781073	541.986	0.0889357	541.986	0.0956138	541.986	0.119506	541.986	0.128894	541.986	0.114823	541.986	0.129097	541.986	0.122327
540.934	0.00257978	540.934	0.0873835	540.934	0.0913888	540.934	0.0824626	540.934	0.0795059	540.934	0.0994343	540.934	0.0943546	540.934	0.0519913	540.934	0.198699	540.934	0.0554442	540.934	0.0672762	540.934	0.0642794	540.934	0.0648225	540.934	0.0650266	540.934	0.103787	540.934	0.101191	540.934	0.0867418	540.934	0.0753777	540.934	0.0900065	540.934	0.0922031	540.934	0.121586	540.934	0.12364	540.934	0.116756	540.934	0.123353	540.934	0.124395
540.031	0.00331445	540.031	0.0886868	540.031	0.0882358	540.031	0.0838686	540.031	0.0769711	540.031	0.101121	540.031	0.0911138	540.031	0.0530092	540.031	0.194924	540.031	0.0552815	540.031	0.0684855	540.031	0.0637687	540.031	0.0659732	540.031	0.06453	540.031	0.105339	540.031	0.0996329	540.031	0.088371	540.031	0.0745875	540.031	0.0918342	540.031	0.0910828	540.031	0.123657	540.031	0.121716	540.031	0.118843	540.031	0.121253	540.031	0.126815
538.978	0.00423675	538.978	0.0902577	538.978	0.0857344	538.978	0.0852902	538.978	0.075045	538.978	0.102753	538.978	0.088238	538.978	0.0541258	538.978	0.18998	538.978	0.0553555	538.978	0.0696423	538.978	0.0631495	538.978	0.0673156	538.978	0.0642771	538.978	0.107539	538.978	0.0987425	538.978	0.0899493	538.978	0.0740187	538.978	0.0938125	538.978	0.0903121	538.978	0.12605	538.978	0.120183	538.978	0.120735	538.978	0.119526	538.978	0.12931
537.925	0.0049139	537.925	0.0913326	537.925	0.083886	537.925	0.0867891	537.925	0.0738203	537.925	0.104195	537.925	0.0861556	537.925	0.0552684	537.925	0.184344	537.925	0.0558809	537.925	0.0708633	537.925	0.0633946	537.925	0.0685505	537.925	0.0643142	537.925	0.10915	537.925	0.0983048	537.925	0.0914633	537.925	0.0739655	537.925	0.0955397	537.925	0.0902348	537.925	0.127857	537.925	0.119498	537.925	0.122771	537.925	0.11895	537.925	0.131553
537.022	0.00538179	537.022	0.0921539	537.022	0.0828743	537.022	0.0873677	537.022	0.0727059	537.022	0.105018	537.022	0.0846975	537.022	0.0558837	537.022	0.191699	537.022	0.0561529	537.022	0.0715824	537.022	0.0634648	537.022	0.0691826	537.022	0.0645212	537.022	0.110141	537.022	0.0983552	537.022	0.0920961	537.022	0.074316	537.022	0.0964806	537.022	0.0903383	537.022	0.129471	537.022	0.119214	537.022	0.124052	537.022	0.118542	537.022	0.132882
535.968	0.0059927	535.968	0.0933285	535.968	0.0826443	535.968	0.0886394	535.968	0.0728248	535.968	0.106287	535.968	0.0844385	535.968	0.0568539	535.968	0.194377	535.968	0.0571427	535.968	0.0727276	535.968	0.0641644	535.968	0.0704012	535.968	0.0653837	535.968	0.111376	535.968	0.099344	535.968	0.0934015	535.968	0.0750918	535.968	0.0979224	535.968	0.0913172	535.968	0.13098	535.968	0.119966	535.968	0.125381	535.968	0.119391	535.968	0.134504
535.064	0.00667733	535.064	0.0942324	535.064	0.0834332	535.064	0.0894479	535.064	0.0738099	535.064	0.107202	535.064	0.0853196	535.064	0.0578246	535.064	0.185994	535.064	0.0583486	535.064	0.0737211	535.064	0.0654532	535.064	0.0713719	535.064	0.0666394	535.064	0.112413	535.064	0.10069	535.064	0.0940635	535.064	0.0764656	535.064	0.0992877	535.064	0.0929009	535.064	0.131883	535.064	0.121354	535.064	0.126369	535.064	0.12096	535.064	0.135709
534.01	0.00695665	534.01	0.0948449	534.01	0.0847065	534.01	0.0899702	534.01	0.0750287	534.01	0.107803	534.01	0.0867418	534.01	0.0584973	534.01	0.189552	534.01	0.0595694	534.01	0.0742027	534.01	0.0666641	534.01	0.0720747	534.01	0.0679273	534.01	0.112735	534.01	0.102521	534.01	0.0943733	534.01	0.0777805	534.01	0.0994158	534.01	0.0944788	534.01	0.132149	534.01	0.123232	534.01	0.126591	534.01	0.122621	534.01	0.135925
532.956	0.00713871	532.956	0.0951972	532.956	0.0868432	532.956	0.0903719	532.956	0.0767459	532.956	0.108114	532.956	0.0885327	532.956	0.0586462	532.956	0.202132	532.956	0.0604722	532.956	0.0745261	532.956	0.0677672	532.956	0.072257	532.956	0.069437	532.956	0.112938	532.956	0.10441	532.956	0.0942036	532.956	0.079319	532.956	0.0995947	532.956	0.0964462	532.956	0.132293	532.956	0.125364	532.956	0.126913	532.956	0.124724	532.956	0.135583
532.051	0.0077459	532.051	0.0961015	532.051	0.0901519	532.051	0.0910568	532.051	0.0797183	532.051	0.108903	532.051	0.0923463	532.051	0.0596232	532.051	0.200437	532.051	0.0627134	532.051	0.0753622	532.051	0.0703576	532.051	0.0733807	532.051	0.0717654	532.051	0.113694	532.051	0.1078	532.051	0.0950348	532.051	0.0819261	532.051	0.100526	532.051	0.0996305	532.051	0.13261	532.051	0.129032	532.051	0.127573	532.051	0.128722	532.051	0.136316
530.996	0.00858929	530.996	0.0965588	530.996	0.0953447	530.996	0.0918558	530.996	0.0845701	530.996	0.109793	530.996	0.0979436	530.996	0.0605871	530.996	0.196419	530.996	0.0657226	530.996	0.0764033	530.996	0.0735729	530.996	0.0746065	530.996	0.0751882	530.996	0.114339	530.996	0.112713	530.996	0.0958174	530.996	0.0855614	530.996	0.101286	530.996	0.104185	530.996	0.132703	530.996	0.134633	530.996	0.127654	530.996	0.13453	530.996	0.136459
529.941	0.0095278	529.941	0.0975777	529.941	0.100378	529.941	0.0928262	529.941	0.0891507	529.941	0.110443	529.941	0.103373	529.941	0.0618251	529.941	0.190501	529.941	0.0685269	529.941	0.0774632	529.941	0.0770257	529.941	0.0758202	529.941	0.0786452	529.941	0.115108	529.941	0.117597	529.941	0.0967028	529.941	0.0892638	529.941	0.102395	529.941	0.108669	529.941	0.133119	529.941	0.13994	529.941	0.128103	529.941	0.140279	529.941	0.136909
529.036	0.00957921	529.036	0.0975357	529.036	0.103907	529.036	0.0927677	529.036	0.0922659	529.036	0.110468	529.036	0.107127	529.036	0.0619726	529.036	0.206719	529.036	0.0701265	529.036	0.0776641	529.036	0.0789486	529.036	0.0760452	529.036	0.0806874	529.036	0.115009	529.036	0.120782	529.036	0.0965136	529.036	0.0915518	529.036	0.101858	529.036	0.11167	529.036	0.132817	529.036	0.143656	529.036	0.127917	529.036	0.143955	529.036	0.136219
527.981	0.00922234	527.981	0.0971225	527.981	0.106866	527.981	0.0923191	527.981	0.0946964	527.981	0.109717	527.981	0.110278	527.981	0.0617127	527.981	0.218164	527.981	0.071354	527.981	0.0775458	527.981	0.0803163	527.981	0.0756458	527.981	0.0822556	527.981	0.114371	527.981	0.123377	527.981	0.0959563	527.981	0.093373	527.981	0.101361	527.981	0.113935	527.981	0.13201	527.981	0.14637	527.981	0.127207	527.981	0.146881	527.981	0.135037
526.925	0.0100412	526.925	0.0978297	526.925	0.1123	526.925	0.0934042	526.925	0.0996287	526.925	0.11049	526.925	0.116141	526.925	0.0629795	526.925	0.209592	526.925	0.0743679	526.925	0.0787051	526.925	0.0837879	526.925	0.0772463	526.925	0.0858186	526.925	0.115299	526.925	0.128248	526.925	0.0967703	526.925	0.097114	526.925	0.102361	526.925	0.118389	526.925	0.13227	526.925	0.151987	526.925	0.127569	526.925	0.152664	526.925	0.135478
526.02	0.0104877	526.02	0.0979842	526.02	0.116613	526.02	0.0936078	526.02	0.103787	526.02	0.11062	526.02	0.120966	526.02	0.0634444	526.02	0.214453	526.02	0.0764964	526.02	0.079337	526.02	0.0865798	526.02	0.0778334	526.02	0.088471	526.02	0.11571	526.02	0.13228	526.02	0.0972758	526.02	0.100032	526.02	0.102712	526.02	0.121908	526.02	0.132077	526.02	0.156534	526.02	0.127522	526.02	0.157453	526.02	0.135194
524.963	0.0108938	524.963	0.0982419	524.963	0.122375	524.963	0.0939425	524.963	0.108716	524.963	0.110632	524.963	0.127398	524.963	0.0639631	524.963	0.221463	524.963	0.0789894	524.963	0.0799399	524.963	0.0895645	524.963	0.078439	524.963	0.0917979	524.963	0.116151	524.963	0.137202	524.963	0.0976895	524.963	0.103442	524.963	0.103008	524.963	0.126309	524.963	0.132039	524.963	0.162259	524.963	0.127482	524.963	0.163373	524.963	0.135016
524.057	0.0114032	524.057	0.0985207	524.057	0.128259	524.057	0.0944081	524.057	0.114016	524.057	0.111078	524.057	0.133956	524.057	0.0644603	524.057	0.218673	524.057	0.0815815	524.057	0.0806605	524.057	0.0927127	524.057	0.0789782	524.057	0.0950323	524.057	0.116605	524.057	0.141692	524.057	0.0980131	524.057	0.106838	524.057	0.103431	524.057	0.130428	524.057	0.132134	524.057	0.168227	524.057	0.127505	524.057	0.169501	524.057	0.135249
523	0.0116381	523	0.0986645	523	0.134673	523	0.0946794	523	0.11966	523	0.110897	523	0.141209	523	0.0652002	523	0.222207	523	0.0843285	523	0.0813484	523	0.0962409	523	0.0799889	523	0.0986335	523	0.117052	523	0.147089	523	0.0986373	523	0.110762	523	0.1041	523	0.13487	523	0.132105	523	0.174619	523	0.127747	523	0.176232	523	0.135217
521.943	0.0120167	521.943	0.0988289	521.943	0.140281	521.943	0.0948769	521.943	0.124909	521.943	0.111357	521.943	0.14757	521.943	0.0657133	521.943	0.224147	521.943	0.0867882	521.943	0.0821351	521.943	0.0989563	521.943	0.0806595	521.943	0.101633	521.943	0.117807	521.943	0.151357	521.943	0.0993361	521.943	0.113863	521.943	0.104719	521.943	0.138839	521.943	0.132531	521.943	0.17992	521.943	0.128107	521.943	0.181936	521.943	0.135625
521.037	0.0123748	521.037	0.09908	521.037	0.143129	521.037	0.0950397	521.037	0.127185	521.037	0.111549	521.037	0.150757	521.037	0.0661774	521.037	0.222449	521.037	0.0879734	521.037	0.0825641	521.037	0.100549	521.037	0.0811593	521.037	0.103437	521.037	0.118241	521.037	0.153463	521.037	0.099758	521.037	0.115631	521.037	0.105156	521.037	0.140541	521.037	0.132962	521.037	0.18261	521.037	0.128302	521.037	0.184552	521.037	0.135859
519.979	0.0125654	519.979	0.0993182	519.979	0.144262	519.979	0.0955612	519.979	0.128526	519.979	0.111478	519.979	0.151958	519.979	0.0669642	519.979	0.221464	519.979	0.0890619	519.979	0.0834832	519.979	0.101417	519.979	0.0820918	519.979	0.104478	519.979	0.119176	519.979	0.154318	519.979	0.100391	519.979	0.116372	519.979	0.105986	519.979	0.141465	519.979	0.133283	519.979	0.183782	519.979	0.128926	519.979	0.185456	519.979	0.136686
519.073	0.0127448	519.073	0.0994391	519.073	0.142898	519.073	0.0956609	519.073	0.127367	519.073	0.11148	519.073	0.150539	519.073	0.0672392	519.073	0.226011	519.073	0.088902	519.073	0.0838264	519.073	0.101035	519.073	0.0826485	519.073	0.104327	519.073	0.119784	519.073	0.153286	519.073	0.10102	519.073	0.115787	519.073	0.106266	519.073	0.140655	519.073	0.134141	519.073	0.182457	519.073	0.129336	519.073	0.184206	519.073	0.13703
518.015	0.0129065	518.015	0.0994177	518.015	0.140704	518.015	0.0957156	518.015	0.125429	518.015	0.111532	518.015	0.147609	518.015	0.0679032	518.015	0.231247	518.015	0.0885405	518.015	0.0843314	518.015	0.100323	518.015	0.08312	518.015	0.103894	518.015	0.120628	518.015	0.151604	518.015	0.101767	518.015	0.114847	518.015	0.10692	518.015	0.138988	518.015	0.134686	518.015	0.180352	518.015	0.130021	518.015	0.181798	518.015	0.137581
516.956	0.0132862	516.956	0.0997858	516.956	0.136897	516.956	0.0964604	516.956	0.122504	516.956	0.111729	516.956	0.144052	516.956	0.0684289	516.956	0.225771	516.956	0.0880103	516.956	0.0852508	516.956	0.0992568	516.956	0.0840827	516.956	0.102853	516.956	0.12189	516.956	0.149379	516.956	0.102966	516.956	0.113253	516.956	0.108271	516.956	0.136628	516.956	0.136114	516.956	0.177354	516.956	0.131234	516.956	0.178301	516.956	0.139015
516.049	0.0137715	516.049	0.10068	516.049	0.135117	516.049	0.0968911	516.049	0.12117	516.049	0.112364	516.049	0.141788	516.049	0.0694414	516.049	0.227115	516.049	0.0881148	516.049	0.0861309	516.049	0.0988518	516.049	0.0852628	516.049	0.102678	516.049	0.123081	516.049	0.148213	516.049	0.104099	516.049	0.112678	516.049	0.10933	516.049	0.135901	516.049	0.137191	516.049	0.176038	516.049	0.132432	516.049	0.176454	516.049	0.14022
514.99	0.0135319	514.99	0.100277	514.99	0.132012	514.99	0.096966	514.99	0.11821	514.99	0.112269	514.99	0.138352	514.99	0.0694571	514.99	0.222036	514.99	0.0872038	514.99	0.0865043	514.99	0.0974674	514.99	0.0855791	514.99	0.101467	514.99	0.124015	514.99	0.14612	514.99	0.105154	514.99	0.111072	514.99	0.110097	514.99	0.133792	514.99	0.138333	514.99	0.173389	514.99	0.132802	514.99	0.173668	514.99	0.141109
513.931	0.0134967	513.931	0.100696	513.931	0.129275	513.931	0.0974629	513.931	0.116296	513.931	0.112491	513.931	0.135426	513.931	0.070012	513.931	0.222036	513.931	0.086712	513.931	0.08721	513.931	0.09652	513.931	0.0862226	513.931	0.100988	513.931	0.125131	513.931	0.144858	513.931	0.106048	513.931	0.110249	513.931	0.111194	513.931	0.132207	513.931	0.139684	513.931	0.171774	513.931	0.134423	513.931	0.171571	513.931	0.14288
513.023	0.0136071	513.023	0.101067	513.023	0.127361	513.023	0.0979022	513.023	0.114622	513.023	0.112704	513.023	0.133294	513.023	0.0706635	513.023	0.223991	513.023	0.086559	513.023	0.0879307	513.023	0.0958878	513.023	0.0871901	513.023	0.10047	513.023	0.126457	513.023	0.143672	513.023	0.107229	513.023	0.109426	513.023	0.11235	513.023	0.131265	513.023	0.141224	513.023	0.170472	513.023	0.135533	513.023	0.170097	513.023	0.14401
511.964	0.013631	511.964	0.101321	511.964	0.125234	511.964	0.0982519	511.964	0.112667	511.964	0.113027	511.964	0.130897	511.964	0.0712196	511.964	0.224434	511.964	0.0861222	511.964	0.0887111	511.964	0.0951424	511.964	0.0881175	511.964	0.0998647	511.964	0.127887	511.964	0.142671	511.964	0.108597	511.964	0.108942	511.964	0.113863	511.964	0.130204	511.964	0.143014	511.964	0.16916	511.964	0.137298	511.964	0.168526	511.964	0.146031
511.056	0.0136938	511.056	0.101858	511.056	0.123687	511.056	0.0985431	511.056	0.111429	511.056	0.113207	511.056	0.129366	511.056	0.0715915	511.056	0.222702	511.056	0.0859038	511.056	0.0893366	511.056	0.0946482	511.056	0.0886818	511.056	0.0996409	511.056	0.129031	511.056	0.142055	511.056	0.109604	511.056	0.108165	511.056	0.11476	511.056	0.129522	511.056	0.144678	511.056	0.168575	511.056	0.138413	511.056	0.167616	511.056	0.147552
509.996	0.0135958	509.996	0.101822	509.996	0.12151	509.996	0.0991376	509.996	0.109866	509.996	0.113826	509.996	0.12709	509.996	0.0722597	509.996	0.224275	509.996	0.0856515	509.996	0.0901374	509.996	0.0940699	509.996	0.089526	509.996	0.0989492	509.996	0.130559	509.996	0.141018	509.996	0.110955	509.996	0.107865	509.996	0.116256	509.996	0.128722	509.996	0.146519	509.996	0.167667	509.996	0.139988	509.996	0.166146	509.996	0.149452
508.936	0.0135556	508.936	0.102614	508.936	0.119215	508.936	0.0997456	508.936	0.107816	508.936	0.114221	508.936	0.124495	508.936	0.0728512	508.936	0.224124	508.936	0.084771	508.936	0.0909272	508.936	0.0932079	508.936	0.090505	508.936	0.0983219	508.936	0.13184	508.936	0.139648	508.936	0.112338	508.936	0.106983	508.936	0.117497	508.936	0.12735	508.936	0.148225	508.936	0.166205	508.936	0.141484	508.936	0.164332	508.936	0.150891
508.027	0.0136538	508.027	0.103135	508.027	0.116048	508.027	0.100141	508.027	0.105394	508.027	0.114728	508.027	0.121045	508.027	0.0735779	508.027	0.224504	508.027	0.0843151	508.027	0.0920224	508.027	0.0920974	508.027	0.0913138	508.027	0.0975281	508.027	0.133443	508.027	0.137977	508.027	0.113501	508.027	0.105567	508.027	0.118858	508.027	0.125592	508.027	0.150396	508.027	0.164172	508.027	0.143238	508.027	0.162138	508.027	0.152846
506.966	0.013689	506.966	0.10393	506.966	0.112745	506.966	0.101242	506.966	0.102256	506.966	0.115515	506.966	0.116931	506.966	0.0744805	506.966	0.220594	506.966	0.0835351	506.966	0.0930701	506.966	0.0904156	506.966	0.0925525	506.966	0.0962884	506.966	0.135186	506.966	0.135998	506.966	0.11521	506.966	0.104203	506.966	0.12061	506.966	0.123822	506.966	0.152373	506.966	0.161813	506.966	0.145016	506.966	0.159124	506.966	0.154949
506.057	0.0134482	506.057	0.104336	506.057	0.110127	506.057	0.101624	506.057	0.100314	506.057	0.115808	506.057	0.114105	506.057	0.0750241	506.057	0.221812	506.057	0.0829443	506.057	0.093896	506.057	0.0895712	506.057	0.0930697	506.057	0.0956354	506.057	0.136401	506.057	0.134525	506.057	0.116277	506.057	0.103455	506.057	0.121529	506.057	0.122415	506.057	0.153707	506.057	0.16015	506.057	0.146264	506.057	0.156993	506.057	0.156565
504.996	0.0132706	504.996	0.10517	504.996	0.107473	504.996	0.102494	504.996	0.0977471	504.996	0.116576	504.996	0.11152	504.996	0.0757859	504.996	0.218983	504.996	0.0822173	504.996	0.0949587	504.996	0.0887304	504.996	0.0941736	504.996	0.0948344	504.996	0.137695	504.996	0.133134	504.996	0.117509	504.996	0.102188	504.996	0.122727	504.996	0.121075	504.996	0.155345	504.996	0.158612	504.996	0.147668	504.996	0.155009	504.996	0.15799
503.935	0.0131489	503.935	0.105841	503.935	0.10511	503.935	0.103321	503.935	0.0960111	503.935	0.117371	503.935	0.109073	503.935	0.0764137	503.935	0.221116	503.935	0.0818487	503.935	0.0959618	503.935	0.0878616	503.935	0.0949045	503.935	0.0940629	503.935	0.138879	503.935	0.131722	503.935	0.118489	503.935	0.101546	503.935	0.123782	503.935	0.119917	503.935	0.15678	503.935	0.157138	503.935	0.149103	503.935	0.152916	503.935	0.159594
503.025	0.0131067	503.025	0.106772	503.025	0.102867	503.025	0.104034	503.025	0.0941802	503.025	0.118223	503.025	0.106371	503.025	0.0772077	503.025	0.21835	503.025	0.0813514	503.025	0.0968879	503.025	0.0869941	503.025	0.0959825	503.025	0.0935142	503.025	0.140385	503.025	0.130637	503.025	0.119952	503.025	0.100565	503.025	0.125357	503.025	0.118625	503.025	0.158315	503.025	0.155477	503.025	0.150504	503.025	0.150956	503.025	0.160908
501.963	0.0128141	501.963	0.107889	501.963	0.100001	501.963	0.105167	501.963	0.0918114	501.963	0.119382	501.963	0.103409	501.963	0.0783544	501.963	0.216315	501.963	0.0807838	501.963	0.0983136	501.963	0.0860167	501.963	0.0973769	501.963	0.0927751	501.963	0.142042	501.963	0.128881	501.963	0.121743	501.963	0.099734	501.963	0.126828	501.963	0.117096	501.963	0.160203	501.963	0.153722	501.963	0.152356	501.963	0.148562	501.963	0.163112
501.053	0.0125703	501.053	0.108966	501.053	0.098425	501.053	0.106401	501.053	0.0904839	501.053	0.120387	501.053	0.101603	501.053	0.0793063	501.053	0.21716	501.053	0.0805402	501.053	0.0997019	501.053	0.085393	501.053	0.0984158	501.053	0.092429	501.053	0.143161	501.053	0.127991	501.053	0.122917	501.053	0.0990556	501.053	0.128115	501.053	0.116452	501.053	0.161475	501.053	0.152782	501.053	0.153557	501.053	0.147195	501.053	0.164161
499.991	0.0124137	499.991	0.11004	499.991	0.0970066	499.991	0.107603	499.991	0.0894531	499.991	0.121567	499.991	0.100015	499.991	0.0801937	499.991	0.214709	499.991	0.0802815	499.991	0.100849	499.991	0.0852153	499.991	0.0996826	499.991	0.0922627	499.991	0.144557	499.991	0.127442	499.991	0.124387	499.991	0.0986996	499.991	0.129669	499.991	0.115952	499.991	0.163079	499.991	0.15181	499.991	0.155057	499.991	0.14582	499.991	0.165825
498.929	0.012147	498.929	0.111343	498.929	0.0962219	498.929	0.108842	498.929	0.0887436	498.929	0.122724	498.929	0.0991773	498.929	0.0812419	498.929	0.213537	498.929	0.0800366	498.929	0.102191	498.929	0.0849415	498.929	0.101027	498.929	0.092104	498.929	0.14571	498.929	0.127334	498.929	0.1255	498.929	0.0982993	498.929	0.13074	498.929	0.115747	498.929	0.16413	498.929	0.151218	498.929	0.156358	498.929	0.1452	498.929	0.16701
498.018	0.0120071	498.018	0.112314	498.018	0.0955486	498.018	0.109767	498.018	0.0884302	498.018	0.123916	498.018	0.0984934	498.018	0.0822503	498.018	0.214459	498.018	0.0800797	498.018	0.103495	498.018	0.0847676	498.018	0.102143	498.018	0.0920848	498.018	0.146693	498.018	0.12703	498.018	0.126831	498.018	0.0984148	498.018	0.131995	498.018	0.115553	498.018	0.165359	498.018	0.150864	498.018	0.157728	498.018	0.144798	498.018	0.168179
496.955	0.0118324	496.955	0.114059	496.955	0.0951596	496.955	0.111459	496.955	0.0878262	496.955	0.125567	496.955	0.0980618	496.955	0.0837262	496.955	0.221589	496.955	0.0801331	496.955	0.105513	496.955	0.0849539	496.955	0.103867	496.955	0.0924953	496.955	0.148123	496.955	0.127039	496.955	0.128527	496.955	0.0983673	496.955	0.133573	496.955	0.11534	496.955	0.166913	496.955	0.150433	496.955	0.159384	496.955	0.144231	496.955	0.169872
496.044	0.0116678	496.044	0.115614	496.044	0.0950692	496.044	0.113039	496.044	0.0880774	496.044	0.127153	496.044	0.0978987	496.044	0.0850777	496.044	0.221472	496.044	0.0804758	496.044	0.107272	496.044	0.0851123	496.044	0.105417	496.044	0.0928595	496.044	0.149596	496.044	0.127238	496.044	0.130111	496.044	0.09858	496.044	0.135036	496.044	0.115693	496.044	0.168024	496.044	0.150298	496.044	0.160686	496.044	0.143903	496.044	0.171258
494.981	0.0118627	494.981	0.117688	494.981	0.0953829	494.981	0.114975	494.981	0.0885396	494.981	0.129243	494.981	0.0984813	494.981	0.0868537	494.981	0.218545	494.981	0.0809865	494.981	0.109401	494.981	0.0856832	494.981	0.10748	494.981	0.0935916	494.981	0.151218	494.981	0.127568	494.981	0.131909	494.981	0.0988204	494.981	0.136784	494.981	0.115993	494.981	0.169538	494.981	0.150254	494.981	0.162551	494.981	0.143866	494.981	0.172813
494.069	0.0117787	494.069	0.119301	494.069	0.0959106	494.069	0.116621	494.069	0.0888117	494.069	0.130785	494.069	0.0988835	494.069	0.088396	494.069	0.214042	494.069	0.0814274	494.069	0.11117	494.069	0.0860773	494.069	0.108945	494.069	0.0941273	494.069	0.152448	494.069	0.127857	494.069	0.133314	494.069	0.0991179	494.069	0.138297	494.069	0.116433	494.069	0.170742	494.069	0.150507	494.069	0.164124	494.069	0.144169	494.069	0.174226
493.005	0.011784	493.005	0.121736	493.005	0.0962633	493.005	0.119083	493.005	0.0895913	493.005	0.133253	493.005	0.0994844	493.005	0.090416	493.005	0.210091	493.005	0.0819916	493.005	0.113665	493.005	0.0867239	493.005	0.111656	493.005	0.094929	493.005	0.15443	493.005	0.128523	493.005	0.135497	493.005	0.0996568	493.005	0.140521	493.005	0.117051	493.005	0.172729	493.005	0.150636	493.005	0.16598	493.005	0.144646	493.005	0.176312
491.941	0.0118007	491.941	0.124209	491.941	0.0972366	491.941	0.121436	491.941	0.0903297	491.941	0.135859	491.941	0.10033	491.941	0.0926878	491.941	0.222739	491.941	0.0826066	491.941	0.116395	491.941	0.0876314	491.941	0.113944	491.941	0.0959435	491.941	0.156529	491.941	0.129204	491.941	0.137813	491.941	0.100414	491.941	0.142822	491.941	0.117975	491.941	0.174949	491.941	0.151147	491.941	0.168568	491.941	0.145302	491.941	0.178679
491.029	0.0115213	491.029	0.126015	491.029	0.0972295	491.029	0.123369	491.029	0.0906218	491.029	0.137502	491.029	0.100601	491.029	0.0943766	491.029	0.228765	491.029	0.0827888	491.029	0.117997	491.029	0.0876201	491.029	0.115633	491.029	0.0960791	491.029	0.157933	491.029	0.129354	491.029	0.139193	491.029	0.100568	491.029	0.14441	491.029	0.117938	491.029	0.176525	491.029	0.15061	491.029	0.170251	491.029	0.144915	491.029	0.180305
489.965	0.0124938	489.965	0.130153	489.965	0.0992737	489.965	0.127221	489.965	0.092411	489.965	0.141739	489.965	0.102692	489.965	0.0981185	489.965	0.217594	489.965	0.0843226	489.965	0.122101	489.965	0.0894715	489.965	0.119593	489.965	0.0981525	489.965	0.161825	489.965	0.131349	489.965	0.143326	489.965	0.102361	489.965	0.148486	489.965	0.120136	489.965	0.180377	489.965	0.152637	489.965	0.174234	489.965	0.147279	489.965	0.184223
489.053	0.0128666	489.053	0.133118	489.053	0.100287	489.053	0.130452	489.053	0.0936065	489.053	0.144736	489.053	0.104044	489.053	0.100924	489.053	0.214599	489.053	0.0853181	489.053	0.125372	489.053	0.0905625	489.053	0.12274	489.053	0.0991905	489.053	0.164574	489.053	0.132489	489.053	0.146217	489.053	0.103392	489.053	0.151517	489.053	0.121251	489.053	0.183084	489.053	0.153746	489.053	0.177334	489.053	0.148424	489.053	0.187277
487.988	0.0131	487.988	0.13635	487.988	0.101182	487.988	0.133481	487.988	0.094425	487.988	0.148141	487.988	0.104911	487.988	0.103753	487.988	0.225024	487.988	0.0858468	487.988	0.128391	487.988	0.0913423	487.988	0.125667	487.988	0.100254	487.988	0.167295	487.988	0.13344	487.988	0.149125	487.988	0.104221	487.988	0.154521	487.988	0.122184	487.988	0.186292	487.988	0.154199	487.988	0.180429	487.988	0.149117	487.988	0.19048
487.075	0.0132846	487.075	0.139198	487.075	0.102065	487.075	0.136332	487.075	0.0953268	487.075	0.151088	487.075	0.105833	487.075	0.106375	487.075	0.232807	487.075	0.0865186	487.075	0.131123	487.075	0.0921808	487.075	0.128544	487.075	0.101149	487.075	0.170156	487.075	0.134444	487.075	0.151957	487.075	0.105164	487.075	0.157298	487.075	0.123115	487.075	0.189291	487.075	0.154858	487.075	0.183513	487.075	0.150075	487.075	0.193432
486.01	0.014121	486.01	0.144296	486.01	0.103792	486.01	0.141223	486.01	0.0970806	486.01	0.156076	486.01	0.107737	486.01	0.111129	486.01	0.223273	486.01	0.0879553	486.01	0.136049	486.01	0.0937659	486.01	0.133447	486.01	0.102807	486.01	0.175091	486.01	0.13607	486.01	0.156934	486.01	0.106713	486.01	0.16241	486.01	0.124932	486.01	0.194178	486.01	0.156527	486.01	0.188596	486.01	0.151961	486.01	0.19872
484.944	0.0149965	484.944	0.149577	484.944	0.105211	484.944	0.14645	484.944	0.0986329	484.944	0.161211	484.944	0.109389	484.944	0.115914	484.944	0.216351	484.944	0.0893989	484.944	0.141439	484.944	0.0951896	484.944	0.138587	484.944	0.104377	484.944	0.180038	484.944	0.137757	484.944	0.161982	484.944	0.108178	484.944	0.167538	484.944	0.126517	484.944	0.199224	484.944	0.15823	484.944	0.193875	484.944	0.153738	484.944	0.204026
484.031	0.0149245	484.031	0.152605	484.031	0.105801	484.031	0.149486	484.031	0.0991387	484.031	0.164487	484.031	0.109968	484.031	0.119073	484.031	0.234653	484.031	0.0895939	484.031	0.1443	484.031	0.0955791	484.031	0.141632	484.031	0.105102	484.031	0.18291	484.031	0.138239	484.031	0.165131	484.031	0.108632	484.031	0.170772	484.031	0.127092	484.031	0.202643	484.031	0.158199	484.031	0.197313	484.031	0.154059	484.031	0.207264
482.965	0.0155484	482.965	0.158833	482.965	0.107421	482.965	0.155633	482.965	0.100567	482.965	0.170686	482.965	0.111555	482.965	0.124771	482.965	0.242072	482.965	0.0909164	482.965	0.15033	482.965	0.0970629	482.965	0.147537	482.965	0.106725	482.965	0.189209	482.965	0.14004	482.965	0.171248	482.965	0.110243	482.965	0.176892	482.965	0.128928	482.965	0.209042	482.965	0.159652	482.965	0.203833	482.965	0.155535	482.965	0.213875
482.051	0.0158897	482.051	0.163452	482.051	0.108179	482.051	0.160114	482.051	0.10167	482.051	0.175002	482.051	0.112497	482.051	0.129016	482.051	0.239538	482.051	0.0917282	482.051	0.154804	482.051	0.097794	482.051	0.151856	482.051	0.107434	482.051	0.19325	482.051	0.140702	482.051	0.175682	482.051	0.111011	482.051	0.181575	482.051	0.12986	482.051	0.213972	482.051	0.160733	482.051	0.208343	482.051	0.156633	482.051	0.218516
480.985	0.0166606	480.985	0.170281	480.985	0.109825	480.985	0.166977	480.985	0.102983	480.985	0.181968	480.985	0.11417	480.985	0.135491	480.985	0.238364	480.985	0.0927703	480.985	0.161409	480.985	0.0993547	480.985	0.158454	480.985	0.109247	480.985	0.200259	480.985	0.142392	480.985	0.182341	480.985	0.112547	480.985	0.188483	480.985	0.131498	480.985	0.220802	480.985	0.162383	480.985	0.215463	480.985	0.158542	480.985	0.225685
480.071	0.0173795	480.071	0.177686	480.071	0.111129	480.071	0.173999	480.071	0.104355	480.071	0.189239	480.071	0.115771	480.071	0.142566	480.071	0.23646	480.071	0.0940962	480.071	0.168495	480.071	0.100793	480.071	0.165581	480.071	0.110553	480.071	0.207451	480.071	0.143989	480.071	0.189687	480.071	0.113979	480.071	0.195955	480.071	0.133124	480.071	0.22826	480.071	0.163893	480.071	0.223227	480.071	0.160004	480.071	0.233286
479.004	0.018157	479.004	0.185954	479.004	0.112301	479.004	0.182201	479.004	0.105806	479.004	0.197247	479.004	0.117031	479.004	0.150347	479.004	0.235484	479.004	0.0949956	479.004	0.176522	479.004	0.101774	479.004	0.173522	479.004	0.111879	479.004	0.215913	479.004	0.14537	479.004	0.197877	479.004	0.115322	479.004	0.203986	479.004	0.134611	479.004	0.236802	479.004	0.165094	479.004	0.23167	479.004	0.161586	479.004	0.242002
477.937	0.018714	477.937	0.19622	477.937	0.113634	477.937	0.19227	477.937	0.107096	477.937	0.207412	477.937	0.118545	477.937	0.160244	477.937	0.2383	477.937	0.0961563	477.937	0.186595	477.937	0.103131	477.937	0.183304	477.937	0.11342	477.937	0.226217	477.937	0.146804	477.937	0.208228	477.937	0.116554	477.937	0.214387	477.937	0.136208	477.937	0.247476	477.937	0.166569	477.937	0.242457	477.937	0.163123	477.937	0.252527
477.023	0.0192719	477.023	0.204662	477.023	0.114476	477.023	0.200555	477.023	0.10803	477.023	0.215601	477.023	0.11951	477.023	0.168629	477.023	0.237541	477.023	0.0969872	477.023	0.194462	477.023	0.104007	477.023	0.191746	477.023	0.114375	477.023	0.234958	477.023	0.147749	477.023	0.216742	477.023	0.117586	477.023	0.223049	477.023	0.137286	477.023	0.255963	477.023	0.16761	477.023	0.25098	477.023	0.164458	477.023	0.261289
475.955	0.0196955	475.955	0.215766	475.955	0.11558	475.955	0.211252	475.955	0.10908	475.955	0.226429	475.955	0.120627	475.955	0.179439	475.955	0.237126	475.955	0.0979848	475.955	0.205238	475.955	0.105164	475.955	0.202063	475.955	0.11556	475.955	0.246047	475.955	0.149002	475.955	0.227527	475.955	0.118824	475.955	0.234147	475.955	0.138698	475.955	0.267741	475.955	0.168778	475.955	0.262783	475.955	0.165503	475.955	0.272491
475.04	0.0202526	475.04	0.227284	475.04	0.11632	475.04	0.222535	475.04	0.109974	475.04	0.237328	475.04	0.121679	475.04	0.190552	475.04	0.23616	475.04	0.0986137	475.04	0.216571	475.04	0.105955	475.04	0.212865	475.04	0.116623	475.04	0.257982	475.04	0.150026	475.04	0.239094	475.04	0.119876	475.04	0.245403	475.04	0.139695	475.04	0.279502	475.04	0.169852	475.04	0.274281	475.04	0.16692	475.04	0.284205
473.972	0.0210255	473.972	0.243348	473.972	0.117244	473.972	0.237701	473.972	0.111012	473.972	0.253071	473.972	0.122627	473.972	0.206627	473.972	0.24106	473.972	0.0996481	473.972	0.232044	473.972	0.107179	473.972	0.228481	473.972	0.11775	473.972	0.274403	473.972	0.151061	473.972	0.255207	473.972	0.120858	473.972	0.261697	473.972	0.140967	473.972	0.296445	473.972	0.170979	473.972	0.290635	473.972	0.168087	473.972	0.300267
473.057	0.0213788	473.057	0.260154	473.057	0.118064	473.057	0.254733	473.057	0.111634	473.057	0.269453	473.057	0.123438	473.057	0.223346	473.057	0.241638	473.057	0.100439	473.057	0.248607	473.057	0.107952	473.057	0.24435	473.057	0.118795	473.057	0.291779	473.057	0.151896	473.057	0.272493	473.057	0.121973	473.057	0.278372	473.057	0.142144	473.057	0.313831	473.057	0.171846	473.057	0.307817	473.057	0.169218	473.057	0.317163
471.989	0.0218535	471.989	0.279912	471.989	0.118527	471.989	0.273702	471.989	0.112522	471.989	0.288195	471.989	0.124193	471.989	0.243067	471.989	0.239459	471.989	0.100991	471.989	0.267958	471.989	0.108942	471.989	0.263375	471.989	0.119811	471.989	0.311774	471.989	0.152855	471.989	0.292022	471.989	0.122853	471.989	0.298046	471.989	0.143331	471.989	0.334323	471.989	0.172584	471.989	0.328094	471.989	0.170275	471.989	0.336914
471.073	0.022172	471.073	0.295447	471.073	0.119041	471.073	0.289242	471.073	0.113025	471.073	0.303496	471.073	0.12468	471.073	0.258526	471.073	0.240571	471.073	0.101519	471.073	0.283298	471.073	0.109466	471.073	0.278753	471.073	0.120408	471.073	0.328515	471.073	0.153413	471.073	0.307761	471.073	0.123454	471.073	0.313774	471.073	0.144041	471.073	0.350305	471.073	0.173117	471.073	0.343961	471.073	0.170831	471.073	0.352426
470.005	0.0224384	470.005	0.318626	470.005	0.119441	470.005	0.311728	470.005	0.113581	470.005	0.325634	470.005	0.125129	470.005	0.281936	470.005	0.242984	470.005	0.102115	470.005	0.306273	470.005	0.11008	470.005	0.300418	470.005	0.121071	470.005	0.351654	470.005	0.15408	470.005	0.331352	470.005	0.124195	470.005	0.33649	470.005	0.144866	470.005	0.373941	470.005	0.173713	470.005	0.367041	470.005	0.171583	470.005	0.375447
468.936	0.022926	468.936	0.349273	468.936	0.119837	468.936	0.341017	468.936	0.114023	468.936	0.354866	468.936	0.125688	468.936	0.312574	468.936	0.24413	468.936	0.102848	468.936	0.335699	468.936	0.110867	468.936	0.32957	468.936	0.121967	468.936	0.383179	468.936	0.15465	468.936	0.362013	468.936	0.125083	468.936	0.367132	468.936	0.145793	468.936	0.405495	468.936	0.174446	468.936	0.397557	468.936	0.172431	468.936	0.405116
468.019	0.0234744	468.019	0.382931	468.019	0.119918	468.019	0.373779	468.019	0.11448	468.019	0.38756	468.019	0.125937	468.019	0.347323	468.019	0.243479	468.019	0.103229	468.019	0.369446	468.019	0.111481	468.019	0.362183	468.019	0.122762	468.019	0.417734	468.019	0.155236	468.019	0.396715	468.019	0.125679	468.019	0.399977	468.019	0.146598	468.019	0.440262	468.019	0.174866	468.019	0.431635	468.019	0.173133	468.019	0.438659
466.95	0.0238002	466.95	0.419122	466.95	0.120077	466.95	0.408752	466.95	0.114621	466.95	0.421031	466.95	0.12596	466.95	0.383713	466.95	0.243539	466.95	0.103649	466.95	0.405051	466.95	0.111813	466.95	0.396257	466.95	0.123304	466.95	0.454984	466.95	0.155738	466.95	0.431657	466.95	0.12631	466.95	0.435373	466.95	0.147346	466.95	0.476859	466.95	0.175077	466.95	0.467368	466.95	0.17359	466.95	0.473059
466.034	0.0240506	466.034	0.453664	466.034	0.120145	466.034	0.441494	466.034	0.114833	466.034	0.453934	466.034	0.126017	466.034	0.417863	466.034	0.241352	466.034	0.10388	466.034	0.438234	466.034	0.112306	466.034	0.429227	466.034	0.123746	466.034	0.48975	466.034	0.155945	466.034	0.466415	466.034	0.12679	466.034	0.468569	466.034	0.148018	466.034	0.511978	466.034	0.175352	466.034	0.501027	466.034	0.174138	466.034	0.505589
464.964	0.0244335	464.964	0.493706	464.964	0.120339	464.964	0.48137	464.964	0.114996	464.964	0.4926	464.964	0.126303	464.964	0.459585	464.964	0.244551	464.964	0.104236	464.964	0.477451	464.964	0.112889	464.964	0.468668	464.964	0.124361	464.964	0.531473	464.964	0.156235	464.964	0.506743	464.964	0.127315	464.964	0.508536	464.964	0.14872	464.964	0.552654	464.964	0.175686	464.964	0.541407	464.964	0.17475	464.964	0.544909
464.047	0.0246975	464.047	0.54096	464.047	0.120442	464.047	0.526937	464.047	0.115447	464.047	0.537067	464.047	0.126479	464.047	0.50777	464.047	0.244198	464.047	0.104733	464.047	0.524592	464.047	0.113352	464.047	0.51303	464.047	0.124814	464.047	0.580427	464.047	0.156734	464.047	0.554364	464.047	0.127908	464.047	0.554253	464.047	0.149569	464.047	0.601223	464.047	0.176265	464.047	0.588073	464.047	0.175462	464.047	0.591261
462.977	0.0250046	462.977	0.613313	462.977	0.120874	462.977	0.59676	462.977	0.116356	462.977	0.605286	462.977	0.127314	462.977	0.582506	462.977	0.241084	462.977	0.105183	462.977	0.595385	462.977	0.114271	462.977	0.581819	462.977	0.125834	462.977	0.656071	462.977	0.157624	462.977	0.626932	462.977	0.129171	462.977	0.624819	462.977	0.150867	462.977	0.673348	462.977	0.177195	462.977	0.660167	462.977	0.176749	462.977	0.659784
462.06	0.0253846	462.06	0.670527	462.06	0.121491	462.06	0.652094	462.06	0.116711	462.06	0.660675	462.06	0.127825	462.06	0.641884	462.06	0.241549	462.06	0.105651	462.06	0.650487	462.06	0.114662	462.06	0.636681	462.06	0.126337	462.06	0.713446	462.06	0.158349	462.06	0.686311	462.06	0.129901	462.06	0.681394	462.06	0.151806	462.06	0.732803	462.06	0.177898	462.06	0.716234	462.06	0.177635	462.06	0.713539
460.989	0.0258544	460.989	0.751416	460.989	0.122353	460.989	0.730421	460.989	0.117693	460.989	0.736053	460.989	0.128866	460.989	0.72446	460.989	0.239908	460.989	0.106557	460.989	0.72929	460.989	0.115692	460.989	0.713345	460.989	0.127461	460.989	0.796358	460.989	0.159493	460.989	0.765565	460.989	0.131099	460.989	0.760279	460.989	0.153378	460.989	0.815517	460.989	0.179336	460.989	0.796175	460.989	0.179388	460.989	0.791542
460.072	0.0258621	460.072	0.80009	460.072	0.122511	460.072	0.777923	460.072	0.117998	460.072	0.783126	460.072	0.129005	460.072	0.775044	460.072	0.248076	460.072	0.106772	460.072	0.780294	460.072	0.116121	460.072	0.760073	460.072	0.127769	460.072	0.849199	460.072	0.159756	460.072	0.816852	460.072	0.131597	460.072	0.809467	460.072	0.154149	460.072	0.866302	460.072	0.179438	460.072	0.844074	460.072	0.180043	460.072	0.839331
459.001	0.0258357	459.001	0.888539	459.001	0.12248	459.001	0.862213	459.001	0.118197	459.001	0.866235	459.001	0.12913	459.001	0.865179	459.001	0.250658	459.001	0.106627	459.001	0.865542	459.001	0.116307	459.001	0.844839	459.001	0.128053	459.001	0.93895	459.001	0.159983	459.001	0.903843	459.001	0.131939	459.001	0.894384	459.001	0.154835	459.001	0.955585	459.001	0.180138	459.001	0.932008	459.001	0.180557	459.001	0.923687
457.93	0.0263132	457.93	1.01437	457.93	0.123733	457.93	0.982849	457.93	0.119416	457.93	0.985577	457.93	0.130512	457.93	0.993288	457.93	0.248611	457.93	0.107595	457.93	0.987024	457.93	0.1175	457.93	0.961826	457.93	0.129307	457.93	1.06582	457.93	0.161506	457.93	1.02901	457.93	0.133482	457.93	1.01272	457.93	0.156901	457.93	1.08072	457.93	0.18196	457.93	1.05287	457.93	0.182879	457.93	1.04182
457.011	0.0266171	457.011	1.12122	457.011	0.124524	457.011	1.08461	457.011	0.120285	457.011	1.08294	457.011	0.131746	457.011	1.10134	457.011	0.246397	457.011	0.108132	457.011	1.09202	457.011	0.118517	457.011	1.06389	457.011	0.130301	457.011	1.176	457.011	0.162604	457.011	1.13338	457.011	0.134563	457.011	1.11759	457.011	0.158347	457.011	1.18785	457.011	0.183347	457.011	1.15609	457.011	0.184626	457.011	1.14143
455.94	0.0267458	455.94	1.2451	455.94	0.125556	455.94	1.21019	455.94	0.121596	455.94	1.20717	455.94	0.132863	455.94	1.23469	455.94	0.246286	455.94	0.108861	455.94	1.21819	455.94	0.119414	455.94	1.18881	455.94	0.131155	455.94	1.30721	455.94	0.163995	455.94	1.26649	455.94	0.135912	455.94	1.24538	455.94	0.160211	455.94	1.31817	455.94	0.184905	455.94	1.28235	455.94	0.186791	455.94	1.26288
455.021	0.0269862	455.021	1.34995	455.021	0.126619	455.021	1.31112	455.021	0.122555	455.021	1.30066	455.021	0.133932	455.021	1.34339	455.021	0.247183	455.021	0.109391	455.021	1.32154	455.021	0.12018	455.021	1.28657	455.021	0.131937	455.021	1.41751	455.021	0.164969	455.021	1.36577	455.021	0.136929	455.021	1.3446	455.021	0.161763	455.021	1.42609	455.021	0.186323	455.021	1.38762	455.021	0.188417	455.021	1.3583
453.95	0.0271372	453.95	1.50998	453.95	0.127865	453.95	1.46254	453.95	0.123946	453.95	1.45409	453.95	0.135591	453.95	1.50633	453.95	0.246494	453.95	0.110015	453.95	1.47524	453.95	0.121337	453.95	1.43507	453.95	0.133229	453.95	1.57719	453.95	0.166813	453.95	1.52672	453.95	0.138553	453.95	1.49684	453.95	0.163575	453.95	1.5832	453.95	0.188394	453.95	1.53834	453.95	0.190998	453.95	1.50925
453.031	0.0273935	453.031	1.66397	453.031	0.129272	453.031	1.61651	453.031	0.125352	453.031	1.59827	453.031	0.137093	453.031	1.65885	453.031	0.250714	453.031	0.110704	453.031	1.62928	453.031	0.122317	453.031	1.58437	453.031	0.134075	453.031	1.7374	453.031	0.168291	453.031	1.68088	453.031	0.139833	453.031	1.65095	453.031	0.165617	453.031	1.74133	453.031	0.190276	453.031	1.68829	453.031	0.193408	453.031	1.65263
451.958	0.027504	451.958	1.84385	451.958	0.13109	451.958	1.78369	451.958	0.126915	451.958	1.7669	451.958	0.139413	451.958	1.85666	451.958	0.252728	451.958	0.11161	451.958	1.80661	451.958	0.123857	451.958	1.76019	451.958	0.135591	451.958	1.92523	451.958	0.170546	451.958	1.86465	451.958	0.141925	451.958	1.82464	451.958	0.168274	451.958	1.92621	451.958	0.192894	451.958	1.87253	451.958	0.19669	451.958	1.83414
451.039	0.0276376	451.039	2.01619	451.039	0.13271	451.039	1.96605	451.039	0.129011	451.039	1.9324	451.039	0.141399	451.039	2.02355	451.039	0.251448	451.039	0.112574	451.039	1.96706	451.039	0.12524	451.039	1.92328	451.039	0.136999	451.039	2.10958	451.039	0.172645	451.039	2.02939	451.039	0.143578	451.039	1.9846	451.039	0.170707	451.039	2.10072	451.039	0.19567	451.039	2.03353	451.039	0.199536	451.039	1.98979
449.966	0.0278356	449.966	2.22053	449.966	0.135226	449.966	2.14755	449.966	0.131079	449.966	2.12863	449.966	0.14408	449.966	2.24221	449.966	0.249666	449.966	0.113528	449.966	2.18079	449.966	0.126793	449.966	2.12142	449.966	0.138483	449.966	2.30665	449.966	0.175397	449.966	2.24307	449.966	0.145866	449.966	2.19024	449.966	0.173667	449.966	2.30368	449.966	0.198923	449.966	2.23725	449.966	0.203478	449.966	2.18943
449.047	0.0283439	449.047	2.4044	449.047	0.137751	449.047	2.32669	449.047	0.133707	449.047	2.28983	449.047	0.147034	449.047	2.42617	449.047	0.251387	449.047	0.115091	449.047	2.37884	449.047	0.12887	449.047	2.29768	449.047	0.14048	449.047	2.53087	449.047	0.178182	449.047	2.42818	449.047	0.148361	449.047	2.39049	449.047	0.176956	449.047	2.51404	449.047	0.202334	449.047	2.42587	449.047	0.207049	449.047	2.36094
447.974	0.0284182	447.974	2.6517	447.974	0.140819	447.974	2.56369	447.974	0.136557	447.974	2.56821	447.974	0.150699	447.974	2.7482	447.974	0.253918	447.974	0.11655	447.974	2.64627	447.974	0.131034	447.974	2.52726	447.974	0.14247	447.974	2.80927	447.974	0.18188	447.974	2.70471	447.974	0.151268	447.974	2.67919	447.974	0.180896	447.974	2.73076	447.974	0.206693	447.974	2.6817	447.974	0.212184	447.974	2.64125
447.054	0.0285254	447.054	2.95652	447.054	0.144054	447.054	2.82219	447.054	0.139861	447.054	2.84086	447.054	0.154391	447.054	2.91736	447.054	0.255428	447.054	0.118035	447.054	2.8589	447.054	0.133223	447.054	2.82469	447.054	0.144718	447.054	3.09772	447.054	0.185552	447.054	2.92435	447.054	0.154378	447.054	2.96435	447.054	0.184891	447.054	3.10064	447.054	0.211141	447.054	2.8896	447.054	0.217162	447.054	2.90667
445.98	0.0286766	445.98	3.12348	445.98	0.147812	445.98	2.97021	445.98	0.143379	445.98	2.95731	445.98	0.158636	445.98	3.22472	445.98	0.261543	445.98	0.119691	445.98	3.14111	445.98	0.135706	445.98	3.05482	445.98	0.147104	445.98	3.49748	445.98	0.189699	445.98	3.21915	445.98	0.157625	445.98	3.30592	445.98	0.189373	445.98	3.30186	445.98	0.216173	445.98	3.25948	445.98	0.222765	445.98	3.19837
445.06	0.0284957	445.06	3.16787	445.06	0.151107	445.06	3.25891	445.06	0.146607	445.06	3.22289	445.06	0.162572	445.06	3.38229	445.06	0.261036	445.06	0.120841	445.06	3.21759	445.06	0.137803	445.06	3.29713	445.06	0.148737	445.06	3.50428	445.06	0.193259	445.06	3.26713	445.06	0.160428	445.06	3.33684	445.06	0.193231	445.06	3.46402	445.06	0.220464	445.06	3.32899	445.06	0.228063	445.06	3.13563
443.986	0.0285218	443.986	3.26729	443.986	0.156166	443.986	3.28593	443.986	0.151001	443.986	3.47124	443.986	0.168268	443.986	3.94932	443.986	0.262062	443.986	0.123044	443.986	3.48642	443.986	0.141052	443.986	3.42792	443.986	0.151941	443.986	3.6749	443.986	0.198933	443.986	3.6475	443.986	0.164683	443.986	4.01179	443.986	0.198933	443.986	3.86131	443.986	0.227263	443.986	4.21989	443.986	0.235405	443.986	3.44561
443.066	0.028765	443.066	4.00404	443.066	0.160816	443.066	3.57269	443.066	0.155199	443.066	3.28392	443.066	0.173354	443.066	3.71951	443.066	0.264831	443.066	0.125064	443.066	4.12531	443.066	0.143852	443.066	10	443.066	0.154723	443.066	4.06942	443.066	0.203806	443.066	3.93568	443.066	0.168508	443.066	3.5418	443.066	0.203885	443.066	3.56541	443.066	0.233257	443.066	3.7259	443.066	0.241902	443.066	3.58005
441.992	0.0292312	441.992	10	441.992	0.167644	441.992	10	441.992	0.161509	441.992	10	441.992	0.181179	441.992	10	441.992	0.26476	441.992	0.128372	441.992	10	441.992	0.148616	441.992	4.09993	441.992	0.159231	441.992	10	441.992	0.211648	441.992	10	441.992	0.174588	441.992	10	441.992	0.211697	441.992	10	441.992	0.242345	441.992	10	441.992	0.251885	441.992	10
441.071	0.028653	441.071	4.16422	441.071	0.172689	441.071	3.48166	441.071	0.16652	441.071	3.47717	441.071	0.187041	441.071	10	441.071	0.270102	441.071	0.129974	441.071	3.89763	441.071	0.151357	441.071	10	441.071	0.16197	441.071	10	441.071	0.21713	441.071	3.90937	441.071	0.178602	441.071	10	441.071	0.217204	441.071	3.84473	441.071	0.249382	441.071	4.18287	441.071	0.259328	441.071	3.40565
439.996	0.0289037	439.996	3.54903	439.996	0.18021	439.996	4.30177	439.996	0.173217	439.996	10	439.996	0.195449	439.996	4.10206	439.996	0.276858	439.996	0.13372	439.996	3.5257	439.996	0.156629	439.996	4.29439	439.996	0.166665	439.996	3.6144	439.996	0.22591	439.996	3.77602	439.996	0.184906	439.996	10	439.996	0.225568	439.996	4.61971	439.996	0.258967	439.996	4.45861	439.996	0.270127	439.996	10
439.075	0.0291618	439.075	10	439.075	0.188304	439.075	3.77801	439.075	0.18008	439.075	3.68787	439.075	0.204	439.075	3.97604	439.075	0.277313	439.075	0.137131	439.075	10	439.075	0.161309	439.075	3.9961	439.075	0.171213	439.075	10	439.075	0.234475	439.075	4.38273	439.075	0.191364	439.075	10	439.075	0.233985	439.075	4.58869	439.075	0.268876	439.075	3.50303	439.075	0.280778	439.075	3.82293
438	0.0291617	438	3.60025	438	0.197373	438	3.88165	438	0.188462	438	10	438	0.21415	438	10	438	0.280888	438	0.141282	438	3.5751	438	0.166945	438	4.19357	438	0.176553	438	3.79361	438	0.244939	438	4.15788	438	0.199307	438	5.08911	438	0.243888	438	4.73492	438	0.281142	438	10	438	0.293635	438	4.02643
436.925	0.0291929	436.925	3.8114	436.925	0.207657	436.925	3.91744	436.925	0.197434	436.925	3.56386	436.925	0.225152	436.925	10	436.925	0.284669	436.925	0.145615	436.925	10	436.925	0.173205	436.925	4.12858	436.925	0.182419	436.925	10	436.925	0.25643	436.925	4.25727	436.925	0.207684	436.925	4.37498	436.925	0.2548	436.925	10	436.925	0.294057	436.925	10	436.925	0.307918	436.925	10
436.003	0.0291641	436.003	3.71076	436.003	0.218513	436.003	4.93276	436.003	0.207103	436.003	4.61074	436.003	0.236874	436.003	10	436.003	0.287953	436.003	0.150134	436.003	3.65469	436.003	0.179776	436.003	3.93441	436.003	0.188423	436.003	10	436.003	0.26939	436.003	3.57112	436.003	0.217028	436.003	10	436.003	0.26704	436.003	3.99346	436.003	0.308331	436.003	4.91772	436.003	0.323288	436.003	3.78344
434.927	0.0290548	434.927	3.92441	434.927	0.230869	434.927	10	434.927	0.218218	434.927	3.53313	434.927	0.250669	434.927	10	434.927	0.293483	434.927	0.1557	434.927	10	434.927	0.187401	434.927	3.7342	434.927	0.195493	434.927	10	434.927	0.284763	434.927	4.00799	434.927	0.227742	434.927	10	434.927	0.280938	434.927	3.87701	434.927	0.325439	434.927	3.90385	434.927	0.341119	434.927	10
434.005	0.0289939	434.005	3.67964	434.005	0.245372	434.005	4.26656	434.005	0.230541	434.005	3.67787	434.005	0.265634	434.005	4.10705	434.005	0.301903	434.005	0.16157	434.005	3.87374	434.005	0.195854	434.005	10	434.005	0.203165	434.005	4.90695	434.005	0.302251	434.005	10	434.005	0.24009	434.005	4.26811	434.005	0.296483	434.005	3.62686	434.005	0.343891	434.005	10	434.005	0.360387	434.005	4.28494
432.929	0.0289382	432.929	4.92827	432.929	0.259767	432.929	10	432.929	0.243408	432.929	10	432.929	0.281395	432.929	10	432.929	0.307273	432.929	0.167796	432.929	10	432.929	0.204559	432.929	10	432.929	0.211304	432.929	10	432.929	0.319925	432.929	4.17295	432.929	0.253337	432.929	10	432.929	0.312874	432.929	4.46274	432.929	0.363519	432.929	10	432.929	0.380891	432.929	4.08289
432.007	0.0290197	432.007	3.66256	432.007	0.273998	432.007	10	432.007	0.255905	432.007	10	432.007	0.296596	432.007	3.74881	432.007	0.315344	432.007	0.174082	432.007	3.74411	432.007	0.212822	432.007	3.85442	432.007	0.218672	432.007	10	432.007	0.337286	432.007	4.57363	432.007	0.265552	432.007	4.62654	432.007	0.328026	432.007	10	432.007	0.382158	432.007	10	432.007	0.400476	432.007	10
430.931	0.028825	430.931	5.41435	430.931	0.295038	430.931	10	430.931	0.273994	430.931	10	430.931	0.318073	430.931	10	430.931	0.323316	430.931	0.182824	430.931	10	430.931	0.225059	430.931	10	430.931	0.230182	430.931	3.62754	430.931	0.362993	430.931	10	430.931	0.284275	430.931	10	430.931	0.350941	430.931	3.62311	430.931	0.410276	430.931	10	430.931	0.429474	430.931	3.71678
430.008	0.0288137	430.008	3.89375	430.008	0.31606	430.008	3.97137	430.008	0.293206	430.008	4.39615	430.008	0.34045	430.008	10	430.008	0.330138	430.008	0.191509	430.008	4.32488	430.008	0.237212	430.008	4.59028	430.008	0.241085	430.008	10	430.008	0.389712	430.008	4.007	430.008	0.302977	430.008	5.40762	430.008	0.374473	430.008	10	430.008	0.438715	430.008	4.22106	430.008	0.458611	430.008	10
428.931	0.0287114	428.931	4.0626	428.931	0.345223	428.931	4.26138	428.931	0.318075	428.931	3.92135	428.931	0.372127	428.931	3.50733	428.931	0.34175	428.931	0.2043	428.931	10	428.931	0.253876	428.931	10	428.931	0.25652	428.931	3.79316	428.931	0.425468	428.931	10	428.931	0.328025	428.931	10	428.931	0.405595	428.931	4.15323	428.931	0.477788	428.931	10	428.931	0.498578	428.931	10
428.008	0.0289711	428.008	4.08862	428.008	0.370533	428.008	10	428.008	0.340131	428.008	10	428.008	0.397787	428.008	3.9342	428.008	0.352538	428.008	0.214793	428.008	4.1652	428.008	0.268416	428.008	10	428.008	0.26946	428.008	10	428.008	0.455116	428.008	10	428.008	0.348847	428.008	10	428.008	0.432434	428.008	10	428.008	0.510651	428.008	10	428.008	0.53185	428.008	10
426.931	0.028876	426.931	10	426.931	0.401949	426.931	10	426.931	0.367316	426.931	10	426.931	0.431244	426.931	4.89383	426.931	0.363222	426.931	0.227616	426.931	10	426.931	0.285552	426.931	10	426.931	0.285531	426.931	10	426.931	0.492363	426.931	4.367	426.931	0.374373	426.931	10	426.931	0.464331	426.931	10	426.931	0.551788	426.931	10	426.931	0.573859	426.931	10
426.008	0.0286827	426.008	10	426.008	0.433619	426.008	10	426.008	0.394966	426.008	10	426.008	0.465216	426.008	10	426.008	0.381042	426.008	0.240829	426.008	10	426.008	0.303023	426.008	10	426.008	0.301629	426.008	4.76089	426.008	0.528699	426.008	4.12479	426.008	0.400405	426.008	10	426.008	0.49651	426.008	10	426.008	0.59282	426.008	5.22025	426.008	0.615616	426.008	10
424.93	0.0285707	424.93	10	424.93	0.480499	424.93	10	424.93	0.435066	424.93	10	424.93	0.515013	424.93	10	424.93	0.400841	424.93	0.259189	424.93	10	424.93	0.328519	424.93	10	424.93	0.324834	424.93	10	424.93	0.58	424.93	10	424.93	0.43472	424.93	10	424.93	0.540395	424.93	10	424.93	0.651215	424.93	10	424.93	0.67599	424.93	10
424.006	0.0282837	424.006	10	424.006	0.525491	424.006	10	424.006	0.47415	424.006	10	424.006	0.562733	424.006	4.97861	424.006	0.422721	424.006	0.276672	424.006	10	424.006	0.352308	424.006	10	424.006	0.34682	424.006	10	424.006	0.628812	424.006	10	424.006	0.468559	424.006	10	424.006	0.583414	424.006	10	424.006	0.707331	424.006	10	424.006	0.733385	424.006	10
422.929	0.0283331	422.929	10	422.929	0.581724	422.929	10	422.929	0.523083	422.929	10	422.929	0.622165	422.929	10	422.929	0.441243	422.929	0.298048	422.929	10	422.929	0.380672	422.929	10	422.929	0.37436	422.929	10	422.929	0.684804	422.929	10	422.929	0.507547	422.929	10	422.929	0.632142	422.929	10	422.929	0.774577	422.929	10	422.929	0.803862	422.929	10
422.005	0.0281931	422.005	4.78379	422.005	0.627166	422.005	10	422.005	0.560903	422.005	10	422.005	0.671891	422.005	10	422.005	0.458513	422.005	0.314693	422.005	10	422.005	0.403657	422.005	4.42073	422.005	0.395627	422.005	10	422.005	0.729643	422.005	3.83999	422.005	0.538035	422.005	10	422.005	0.670152	422.005	10	422.005	0.828163	422.005	10	422.005	0.859475	422.005	10
420.926	0.027867	420.926	3.98601	420.926	0.687822	420.926	10	420.926	0.61566	420.926	10	420.926	0.73919	420.926	3.82932	420.926	0.484834	420.926	0.336872	420.926	10	420.926	0.434436	420.926	10	420.926	0.424044	420.926	10	420.926	0.787923	420.926	10	420.926	0.578571	420.926	10	420.926	0.7219	420.926	10	420.926	0.901029	420.926	10	420.926	0.934335	420.926	10
420.002	0.0277956	420.002	10	420.002	0.765043	420.002	10	420.002	0.682178	420.002	4.24616	420.002	0.824618	420.002	3.90192	420.002	0.512937	420.002	0.364305	420.002	10	420.002	0.471842	420.002	10	420.002	0.459671	420.002	10	420.002	0.857475	420.002	10	420.002	0.626732	420.002	10	420.002	0.782453	420.002	10	420.002	0.988322	420.002	10	420.002	1.02483	420.002	5.21954
418.924	0.027087	418.924	3.81854	418.924	0.859462	418.924	4.14394	418.924	0.762302	418.924	10	418.924	0.927186	418.924	10	418.924	0.545567	418.924	0.396276	418.924	10	418.924	0.515492	418.924	4.61113	418.924	0.502447	418.924	10	418.924	0.938388	418.924	10	418.924	0.681943	418.924	10	418.924	0.852052	418.924	10	418.924	1.09204	418.924	3.73307	418.924	1.13595	418.924	3.85366
417.999	0.0270082	417.999	4.57585	417.999	0.937939	417.999	4.96563	417.999	0.829281	417.999	10	417.999	1.01403	417.999	10	417.999	0.573291	417.999	0.422039	417.999	3.77904	417.999	0.549648	417.999	4.35429	417.999	0.53662	417.999	10	417.999	1.00197	417.999	10	417.999	0.725789	417.999	10	417.999	0.907019	417.999	3.45163	417.999	1.17658	417.999	4.32939	417.999	1.22105	417.999	10
417.074	0.0269614	417.074	4.33228	417.074	0.99742	417.074	4.62947	417.074	0.88171	417.074	10	417.074	1.08141	417.074	3.64871	417.074	0.591631	417.074	0.443014	417.074	4.41912	417.074	0.577869	417.074	4.39131	417.074	0.563243	417.074	4.50479	417.074	1.05211	417.074	3.80496	417.074	0.760918	417.074	4.39865	417.074	0.951446	417.074	10	417.074	1.24195	417.074	4.44184	417.074	1.2918	417.074	10
415.995	0.0266085	415.995	4.11843	415.995	1.06644	415.995	10	415.995	0.938954	415.995	10	415.995	1.1558	415.995	3.7295	415.995	0.614857	415.995	0.465879	415.995	3.85894	415.995	0.607869	415.995	10	415.995	0.592411	415.995	3.88444	415.995	1.10614	415.995	10	415.995	0.797974	415.995	4.77883	415.995	0.997618	415.995	10	415.995	1.31756	415.995	3.96834	415.995	1.37034	415.995	10
415.07	0.0264013	415.07	4.256	415.07	1.11571	415.07	4.75199	415.07	0.981379	415.07	10	415.07	1.2095	415.07	4.48612	415.07	0.628797	415.07	0.482279	415.07	10	415.07	0.63	415.07	10	415.07	0.613613	415.07	3.70622	415.07	1.14566	415.07	10	415.07	0.826243	415.07	3.8345	415.07	1.03009	415.07	10	415.07	1.37071	415.07	3.59309	415.07	1.42584	415.07	3.97571
413.99	0.0261137	413.99	3.69568	413.99	1.13221	413.99	4.40248	413.99	0.996507	413.99	3.70121	413.99	1.22958	413.99	4.32744	413.99	0.632893	413.99	0.488528	413.99	10	413.99	0.637111	413.99	10	413.99	0.621023	413.99	3.72195	413.99	1.1599	413.99	10	413.99	0.833897	413.99	10	413.99	1.04054	413.99	10	413.99	1.39587	413.99	10	413.99	1.45317	413.99	10
413.065	0.0260468	413.065	10	413.065	1.1205	413.065	4.48248	413.065	0.984043	413.065	10	413.065	1.2146	413.065	3.77164	413.065	0.630799	413.065	0.485464	413.065	10	413.065	0.631519	413.065	4.87563	413.065	0.615755	413.065	4.62014	413.065	1.14827	413.065	3.86792	413.065	0.826169	413.065	10	413.065	1.03028	413.065	10	413.065	1.3856	413.065	4.86179	413.065	1.44045	413.065	10
411.985	0.0257588	411.985	3.91939	411.985	1.08447	411.985	10	411.985	0.953571	411.985	10	411.985	1.1769	411.985	10	411.985	0.618527	411.985	0.475681	411.985	3.56224	411.985	0.616959	411.985	10	411.985	0.601227	411.985	3.87051	411.985	1.12263	411.985	10	411.985	0.806955	411.985	10	411.985	1.00635	411.985	10	411.985	1.35743	411.985	4.4073	411.985	1.41216	411.985	10
411.059	0.0255116	411.059	4.09358	411.059	1.04889	411.059	4.04901	411.059	0.920413	411.059	4.67095	411.059	1.1355	411.059	3.79233	411.059	0.603103	411.059	0.465228	411.059	10	411.059	0.601198	411.059	4.21767	411.059	0.586125	411.059	3.99321	411.059	1.09295	411.059	4.15657	411.059	0.785939	411.059	3.91052	411.059	0.979329	411.059	10	411.059	1.32567	411.059	3.67907	411.059	1.37775	411.059	10
409.979	0.0251977	409.979	3.85933	409.979	0.988578	409.979	3.86759	409.979	0.868239	409.979	10	409.979	1.06703	409.979	4.90999	409.979	0.588905	409.979	0.448682	409.979	4.67789	409.979	0.575241	409.979	4.23603	409.979	0.561358	409.979	4.24065	409.979	1.04679	409.979	10	409.979	0.753976	409.979	10	409.979	0.937848	409.979	10	409.979	1.26926	409.979	4.06149	409.979	1.31954	409.979	4.90905
409.053	0.0250321	409.053	3.86296	409.053	0.924289	409.053	4.23616	409.053	0.812977	409.053	4.20607	409.053	0.996994	409.053	4.33234	409.053	0.57019	409.053	0.431864	409.053	10	409.053	0.548437	409.053	10	409.053	0.535106	409.053	3.74979	409.053	1.00109	409.053	3.5506	409.053	0.719663	409.053	10	409.053	0.895389	409.053	10	409.053	1.2153	409.053	10	409.053	1.25894	409.053	4.23144
407.973	0.024942	407.973	5.03166	407.973	0.86727	407.973	10	407.973	0.763586	407.973	10	407.973	0.930691	407.973	10	407.973	0.549635	407.973	0.417415	407.973	4.64983	407.973	0.525037	407.973	3.84257	407.973	0.512874	407.973	10	407.973	0.961205	407.973	10	407.973	0.689763	407.973	10	407.973	0.858612	407.973	3.63298	407.973	1.16423	407.973	10	407.973	1.2062	407.973	3.95643
407.046	0.0247856	407.046	10	407.046	0.822712	407.046	4.05327	407.046	0.723722	407.046	4.00587	407.046	0.880228	407.046	4.16325	407.046	0.539284	407.046	0.406544	407.046	10	407.046	0.507519	407.046	10	407.046	0.494688	407.046	3.80101	407.046	0.93042	407.046	3.97696	407.046	0.668205	407.046	10	407.046	0.828781	407.046	3.96634	407.046	1.12723	407.046	4.1522	407.046	1.16421	407.046	4.30921
405.965	0.0246859	405.965	10	405.965	0.778783	405.965	3.61356	405.965	0.686226	405.965	3.55414	405.965	0.827902	405.965	4.89496	405.965	0.525883	405.965	0.396726	405.965	4.48719	405.965	0.490667	405.965	4.33646	405.965	0.478474	405.965	10	405.965	0.900384	405.965	10	405.965	0.645413	405.965	10	405.965	0.800564	405.965	4.62589	405.965	1.08807	405.965	10	405.965	1.12372	405.965	4.13986
405.039	0.024534	405.039	4.57217	405.039	0.737018	405.039	10	405.039	0.649796	405.039	10	405.039	0.780873	405.039	3.91282	405.039	0.519698	405.039	0.388459	405.039	10	405.039	0.475505	405.039	4.55475	405.039	0.463168	405.039	3.68354	405.039	0.8723	405.039	3.53698	405.039	0.624912	405.039	10	405.039	0.775174	405.039	10	405.039	1.05299	405.039	3.94844	405.039	1.08618	405.039	4.22679
403.957	0.0245537	403.957	10	403.957	0.692318	403.957	3.63118	403.957	0.609823	403.957	4.20632	403.957	0.72686	403.957	10	403.957	0.514987	403.957	0.380982	403.957	5.38581	403.957	0.459897	403.957	3.95735	403.957	0.447439	403.957	10	403.957	0.842898	403.957	10	403.957	0.603014	403.957	10	403.957	0.747328	403.957	10	403.957	1.01564	403.957	4.70056	403.957	1.04544	403.957	10
403.031	0.0245962	403.031	10	403.031	0.662561	403.031	10	403.031	0.585172	403.031	10	403.031	0.692564	403.031	3.98584	403.031	0.506629	403.031	0.37735	403.031	10	403.031	0.450481	403.031	10	403.031	0.43808	403.031	5.04	403.031	0.824527	403.031	3.52251	403.031	0.58896	403.031	10	403.031	0.729675	403.031	4.2217	403.031	0.989351	403.031	10	403.031	1.01776	403.031	10
401.949	0.0249612	401.949	10	401.949	0.630742	401.949	3.8631	401.949	0.556897	401.949	3.93121	401.949	0.65454	401.949	10	401.949	0.501215	401.949	0.374129	401.949	4.48223	401.949	0.440839	401.949	10	401.949	0.428644	401.949	3.62706	401.949	0.805281	401.949	10	401.949	0.57339	401.949	10	401.949	0.71142	401.949	4.86697	401.949	0.963005	401.949	5.3194	401.949	0.989105	401.949	4.61841
401.022	0.0248545	401.022	10	401.022	0.613313	401.022	4.46012	401.022	0.542334	401.022	4.72933	401.022	0.632407	401.022	3.64337	401.022	0.499304	401.022	0.373142	401.022	4.09705	401.022	0.43681	401.022	10	401.022	0.423622	401.022	10	401.022	0.793544	401.022	4.73507	401.022	0.564623	401.022	10	401.022	0.699734	401.022	10	401.022	0.946918	401.022	10	401.022	0.972618	401.022	5.3056
399.94	0.0253066	399.94	4.09607	399.94	0.588336	399.94	4.07976	399.94	0.520505	399.94	5.34186	399.94	0.602983	399.94	10	399.94	0.495552	399.94	0.372405	399.94	3.37635	399.94	0.430546	399.94	10	399.94	0.417595	399.94	3.82921	399.94	0.777684	399.94	4.34681	399.94	0.551718	399.94	3.98638	399.94	0.684657	399.94	10	399.94	0.923633	399.94	10	399.94	0.948786	399.94	10
bper alone
bper alone
Collection Time: 10/17/2013 2:45:04 PM
Operator Name :
Scan Software Version: 3.00(182)
Parameter List :
Instrument Cary 50
Instrument Version 3.00
Start (nm) 700.0
Stop (nm) 400.0
X Mode Nanometers
Y Mode Abs
UV-Vis Scan Rate (nm/min) 600.00
UV-Vis Data Interval (nm) 1.00
UV-Vis Ave. Time (sec) 0.1000
Beam Mode Dual Beam
Baseline Correction Off
Cycle Mode Off
Comments
Method Log :
Method Name : C:\Users\chemuser\Desktop\Pellock\heme spectra.MSW
Date/Time stamp: 10/11/2013 11:18:31 PM
Method Modifications:
Cell Changer 6x6 Changed: 10/11/2013 11:01:28 PM	Old:1	New:0
UVVIS SAT Changed: 10/11/2013 11:02:03 PM	Old:0.0125	New:0.1000
NIR SAT Changed: 10/11/2013 11:02:03 PM	Old:0.0125	New:0.1000
Common SAT Changed: 10/11/2013 11:02:03 PM	Old:0.0125	New:0.1000
UVVIS SAT Changed: 10/11/2013 11:02:19 PM	Old:0.1000	New:0.0125
NIR SAT Changed: 10/11/2013 11:02:19 PM	Old:0.1000	New:0.0125
Common SAT Changed: 10/11/2013 11:02:19 PM	Old:0.1000	New:0.0125
UVVIS SAT Changed: 10/11/2013 11:02:31 PM	Old:0.0125	New:0.5000
NIR SAT Changed: 10/11/2013 11:02:31 PM	Old:0.0125	New:0.5000
Common SAT Changed: 10/11/2013 11:02:31 PM	Old:0.0125	New:0.5000
UVVIS SAT Changed: 10/11/2013 11:02:38 PM	Old:0.5000	New:0.1000
NIR SAT Changed: 10/11/2013 11:02:38 PM	Old:0.5000	New:0.1000
Common SAT Changed: 10/11/2013 11:02:38 PM	Old:0.5000	New:0.1000
Temp Controller Changed: 10/11/2013 11:02:53 PM	Old:0	New:2
Sipper Type Changed: 10/11/2013 11:02:53 PM	Old:Internal RSA	New:External sipper
Saved as C:\Users\chemuser\Desktop\Pellock\heme spectra.MSW
Opened C:\Users\chemuser\Desktop\Pellock\heme spectra.MSW
End Method Modifications
<Current Wavelength>	401
mr1 4hr ev ox1
mr1 4hr ev ox1
Collection Time: 10/17/2013 2:50:37 PM
Operator Name :
Scan Software Version: 3.00(182)
Parameter List :
Instrument Cary 50
Instrument Version 3.00
Start (nm) 700.0
Stop (nm) 400.0
X Mode Nanometers
Y Mode Abs
UV-Vis Scan Rate (nm/min) 600.00
UV-Vis Data Interval (nm) 1.00
UV-Vis Ave. Time (sec) 0.1000
Beam Mode Dual Beam
Baseline Correction Off
Cycle Mode Off
Comments
Method Log :
Method Name : C:\Users\chemuser\Desktop\Pellock\heme spectra.MSW
Date/Time stamp: 10/11/2013 11:18:31 PM
Method Modifications:
Cell Changer 6x6 Changed: 10/11/2013 11:01:28 PM	Old:1	New:0
UVVIS SAT Changed: 10/11/2013 11:02:03 PM	Old:0.0125	New:0.1000
NIR SAT Changed: 10/11/2013 11:02:03 PM	Old:0.0125	New:0.1000
Common SAT Changed: 10/11/2013 11:02:03 PM	Old:0.0125	New:0.1000
UVVIS SAT Changed: 10/11/2013 11:02:19 PM	Old:0.1000	New:0.0125
NIR SAT Changed: 10/11/2013 11:02:19 PM	Old:0.1000	New:0.0125
Common SAT Changed: 10/11/2013 11:02:19 PM	Old:0.1000	New:0.0125
UVVIS SAT Changed: 10/11/2013 11:02:31 PM	Old:0.0125	New:0.5000
NIR SAT Changed: 10/11/2013 11:02:31 PM	Old:0.0125	New:0.5000
Common SAT Changed: 10/11/2013 11:02:31 PM	Old:0.0125	New:0.5000
UVVIS SAT Changed: 10/11/2013 11:02:38 PM	Old:0.5000	New:0.1000
NIR SAT Changed: 10/11/2013 11:02:38 PM	Old:0.5000	New:0.1000
Common SAT Changed: 10/11/2013 11:02:38 PM	Old:0.5000	New:0.1000
Temp Controller Changed: 10/11/2013 11:02:53 PM	Old:0	New:2
Sipper Type Changed: 10/11/2013 11:02:53 PM	Old:Internal RSA	New:External sipper
Saved as C:\Users\chemuser\Desktop\Pellock\heme spectra.MSW
Opened C:\Users\chemuser\Desktop\Pellock\heme spectra.MSW
End Method Modifications
<Current Wavelength>	401
mr1 4hr ev red #1
mr1 4hr ev red #1
Collection Time: 10/17/2013 2:52:33 PM
Operator Name :
Scan Software Version: 3.00(182)
Parameter List :
Instrument Cary 50
Instrument Version 3.00
Start (nm) 700.0
Stop (nm) 400.0
X Mode Nanometers
Y Mode Abs
UV-Vis Scan Rate (nm/min) 600.00
UV-Vis Data Interval (nm) 1.00
UV-Vis Ave. Time (sec) 0.1000
Beam Mode Dual Beam
Baseline Correction Off
Cycle Mode Off
Comments
Method Log :
Method Name : C:\Users\chemuser\Desktop\Pellock\heme spectra.MSW
Date/Time stamp: 10/11/2013 11:18:31 PM
Method Modifications:
Cell Changer 6x6 Changed: 10/11/2013 11:01:28 PM	Old:1	New:0
UVVIS SAT Changed: 10/11/2013 11:02:03 PM	Old:0.0125	New:0.1000
NIR SAT Changed: 10/11/2013 11:02:03 PM	Old:0.0125	New:0.1000
Common SAT Changed: 10/11/2013 11:02:03 PM	Old:0.0125	New:0.1000
UVVIS SAT Changed: 10/11/2013 11:02:19 PM	Old:0.1000	New:0.0125
NIR SAT Changed: 10/11/2013 11:02:19 PM	Old:0.1000	New:0.0125
Common SAT Changed: 10/11/2013 11:02:19 PM	Old:0.1000	New:0.0125
UVVIS SAT Changed: 10/11/2013 11:02:31 PM	Old:0.0125	New:0.5000
NIR SAT Changed: 10/11/2013 11:02:31 PM	Old:0.0125	New:0.5000
Common SAT Changed: 10/11/2013 11:02:31 PM	Old:0.0125	New:0.5000
UVVIS SAT Changed: 10/11/2013 11:02:38 PM	Old:0.5000	New:0.1000
NIR SAT Changed: 10/11/2013 11:02:38 PM	Old:0.5000	New:0.1000
Common SAT Changed: 10/11/2013 11:02:38 PM	Old:0.5000	New:0.1000
Temp Controller Changed: 10/11/2013 11:02:53 PM	Old:0	New:2
Sipper Type Changed: 10/11/2013 11:02:53 PM	Old:Internal RSA	New:External sipper
Saved as C:\Users\chemuser\Desktop\Pellock\heme spectra.MSW
Opened C:\Users\chemuser\Desktop\Pellock\heme spectra.MSW
End Method Modifications
<Current Wavelength>	401
mr1 4hr ev ox #2
mr1 4hr ev ox #2
Collection Time: 10/17/2013 2:54:07 PM
Operator Name :
Scan Software Version: 3.00(182)
Parameter List :
Instrument Cary 50
Instrument Version 3.00
Start (nm) 700.0
Stop (nm) 400.0
X Mode Nanometers
Y Mode Abs
UV-Vis Scan Rate (nm/min) 600.00
UV-Vis Data Interval (nm) 1.00
UV-Vis Ave. Time (sec) 0.1000
Beam Mode Dual Beam
Baseline Correction Off
Cycle Mode Off
Comments
Method Log :
Method Name : C:\Users\chemuser\Desktop\Pellock\heme spectra.MSW
Date/Time stamp: 10/11/2013 11:18:31 PM
Method Modifications:
Cell Changer 6x6 Changed: 10/11/2013 11:01:28 PM	Old:1	New:0
UVVIS SAT Changed: 10/11/2013 11:02:03 PM	Old:0.0125	New:0.1000
NIR SAT Changed: 10/11/2013 11:02:03 PM	Old:0.0125	New:0.1000
Common SAT Changed: 10/11/2013 11:02:03 PM	Old:0.0125	New:0.1000
UVVIS SAT Changed: 10/11/2013 11:02:19 PM	Old:0.1000	New:0.0125
NIR SAT Changed: 10/11/2013 11:02:19 PM	Old:0.1000	New:0.0125
Common SAT Changed: 10/11/2013 11:02:19 PM	Old:0.1000	New:0.0125
UVVIS SAT Changed: 10/11/2013 11:02:31 PM	Old:0.0125	New:0.5000
NIR SAT Changed: 10/11/2013 11:02:31 PM	Old:0.0125	New:0.5000
Common SAT Changed: 10/11/2013 11:02:31 PM	Old:0.0125	New:0.5000
UVVIS SAT Changed: 10/11/2013 11:02:38 PM	Old:0.5000	New:0.1000
NIR SAT Changed: 10/11/2013 11:02:38 PM	Old:0.5000	New:0.1000
Common SAT Changed: 10/11/2013 11:02:38 PM	Old:0.5000	New:0.1000
Temp Controller Changed: 10/11/2013 11:02:53 PM	Old:0	New:2
Sipper Type Changed: 10/11/2013 11:02:53 PM	Old:Internal RSA	New:External sipper
Saved as C:\Users\chemuser\Desktop\Pellock\heme spectra.MSW
Opened C:\Users\chemuser\Desktop\Pellock\heme spectra.MSW
End Method Modifications
<Current Wavelength>	401
mr1 4hr ev red #2
mr1 4hr ev red #2
Collection Time: 10/17/2013 2:55:45 PM
Operator Name :
Scan Software Version: 3.00(182)
Parameter List :
Instrument Cary 50
Instrument Version 3.00
Start (nm) 700.0
Stop (nm) 400.0
X Mode Nanometers
Y Mode Abs
UV-Vis Scan Rate (nm/min) 600.00
UV-Vis Data Interval (nm) 1.00
UV-Vis Ave. Time (sec) 0.1000
Beam Mode Dual Beam
Baseline Correction Off
Cycle Mode Off
Comments
Method Log :
Method Name : C:\Users\chemuser\Desktop\Pellock\heme spectra.MSW
Date/Time stamp: 10/11/2013 11:18:31 PM
Method Modifications:
Cell Changer 6x6 Changed: 10/11/2013 11:01:28 PM	Old:1	New:0
UVVIS SAT Changed: 10/11/2013 11:02:03 PM	Old:0.0125	New:0.1000
NIR SAT Changed: 10/11/2013 11:02:03 PM	Old:0.0125	New:0.1000
Common SAT Changed: 10/11/2013 11:02:03 PM	Old:0.0125	New:0.1000
UVVIS SAT Changed: 10/11/2013 11:02:19 PM	Old:0.1000	New:0.0125
NIR SAT Changed: 10/11/2013 11:02:19 PM	Old:0.1000	New:0.0125
Common SAT Changed: 10/11/2013 11:02:19 PM	Old:0.1000	New:0.0125
UVVIS SAT Changed: 10/11/2013 11:02:31 PM	Old:0.0125	New:0.5000
NIR SAT Changed: 10/11/2013 11:02:31 PM	Old:0.0125	New:0.5000
Common SAT Changed: 10/11/2013 11:02:31 PM	Old:0.0125	New:0.5000
UVVIS SAT Changed: 10/11/2013 11:02:38 PM	Old:0.5000	New:0.1000
NIR SAT Changed: 10/11/2013 11:02:38 PM	Old:0.5000	New:0.1000
Common SAT Changed: 10/11/2013 11:02:38 PM	Old:0.5000	New:0.1000
Temp Controller Changed: 10/11/2013 11:02:53 PM	Old:0	New:2
Sipper Type Changed: 10/11/2013 11:02:53 PM	Old:Internal RSA	New:External sipper
Saved as C:\Users\chemuser\Desktop\Pellock\heme spectra.MSW
Opened C:\Users\chemuser\Desktop\Pellock\heme spectra.MSW
End Method Modifications
<Current Wavelength>	401
mr1 4hr ev ox #3
mr1 4hr ev ox #3
Collection Time: 10/17/2013 2:57:10 PM
Operator Name :
Scan Software Version: 3.00(182)
Parameter List :
Instrument Cary 50
Instrument Version 3.00
Start (nm) 700.0
Stop (nm) 400.0
X Mode Nanometers
Y Mode Abs
UV-Vis Scan Rate (nm/min) 600.00
UV-Vis Data Interval (nm) 1.00
UV-Vis Ave. Time (sec) 0.1000
Beam Mode Dual Beam
Baseline Correction Off
Cycle Mode Off
Comments
Method Log :
Method Name : C:\Users\chemuser\Desktop\Pellock\heme spectra.MSW
Date/Time stamp: 10/11/2013 11:18:31 PM
Method Modifications:
Cell Changer 6x6 Changed: 10/11/2013 11:01:28 PM	Old:1	New:0
UVVIS SAT Changed: 10/11/2013 11:02:03 PM	Old:0.0125	New:0.1000
NIR SAT Changed: 10/11/2013 11:02:03 PM	Old:0.0125	New:0.1000
Common SAT Changed: 10/11/2013 11:02:03 PM	Old:0.0125	New:0.1000
UVVIS SAT Changed: 10/11/2013 11:02:19 PM	Old:0.1000	New:0.0125
NIR SAT Changed: 10/11/2013 11:02:19 PM	Old:0.1000	New:0.0125
Common SAT Changed: 10/11/2013 11:02:19 PM	Old:0.1000	New:0.0125
UVVIS SAT Changed: 10/11/2013 11:02:31 PM	Old:0.0125	New:0.5000
NIR SAT Changed: 10/11/2013 11:02:31 PM	Old:0.0125	New:0.5000
Common SAT Changed: 10/11/2013 11:02:31 PM	Old:0.0125	New:0.5000
UVVIS SAT Changed: 10/11/2013 11:02:38 PM	Old:0.5000	New:0.1000
NIR SAT Changed: 10/11/2013 11:02:38 PM	Old:0.5000	New:0.1000
Common SAT Changed: 10/11/2013 11:02:38 PM	Old:0.5000	New:0.1000
Temp Controller Changed: 10/11/2013 11:02:53 PM	Old:0	New:2
Sipper Type Changed: 10/11/2013 11:02:53 PM	Old:Internal RSA	New:External sipper
Saved as C:\Users\chemuser\Desktop\Pellock\heme spectra.MSW
Opened C:\Users\chemuser\Desktop\Pellock\heme spectra.MSW
End Method Modifications
<Current Wavelength>	401
mr1 4hr ev red #3
mr1 4hr ev red #3
Collection Time: 10/17/2013 2:58:54 PM
Operator Name :
Scan Software Version: 3.00(182)
Parameter List :
Instrument Cary 50
Instrument Version 3.00
Start (nm) 700.0
Stop (nm) 400.0
X Mode Nanometers
Y Mode Abs
UV-Vis Scan Rate (nm/min) 600.00
UV-Vis Data Interval (nm) 1.00
UV-Vis Ave. Time (sec) 0.1000
Beam Mode Dual Beam
Baseline Correction Off
Cycle Mode Off
Comments
Method Log :
Method Name : C:\Users\chemuser\Desktop\Pellock\heme spectra.MSW
Date/Time stamp: 10/11/2013 11:18:31 PM
Method Modifications:
Cell Changer 6x6 Changed: 10/11/2013 11:01:28 PM	Old:1	New:0
UVVIS SAT Changed: 10/11/2013 11:02:03 PM	Old:0.0125	New:0.1000
NIR SAT Changed: 10/11/2013 11:02:03 PM	Old:0.0125	New:0.1000
Common SAT Changed: 10/11/2013 11:02:03 PM	Old:0.0125	New:0.1000
UVVIS SAT Changed: 10/11/2013 11:02:19 PM	Old:0.1000	New:0.0125
NIR SAT Changed: 10/11/2013 11:02:19 PM	Old:0.1000	New:0.0125
Common SAT Changed: 10/11/2013 11:02:19 PM	Old:0.1000	New:0.0125
UVVIS SAT Changed: 10/11/2013 11:02:31 PM	Old:0.0125	New:0.5000
NIR SAT Changed: 10/11/2013 11:02:31 PM	Old:0.0125	New:0.5000
Common SAT Changed: 10/11/2013 11:02:31 PM	Old:0.0125	New:0.5000
UVVIS SAT Changed: 10/11/2013 11:02:38 PM	Old:0.5000	New:0.1000
NIR SAT Changed: 10/11/2013 11:02:38 PM	Old:0.5000	New:0.1000
Common SAT Changed: 10/11/2013 11:02:38 PM	Old:0.5000	New:0.1000
Temp Controller Changed: 10/11/2013 11:02:53 PM	Old:0	New:2
Sipper Type Changed: 10/11/2013 11:02:53 PM	Old:Internal RSA	New:External sipper
Saved as C:\Users\chemuser\Desktop\Pellock\heme spectra.MSW
Opened C:\Users\chemuser\Desktop\Pellock\heme spectra.MSW
End Method Modifications
<Current Wavelength>	401
15 4hr ev ox #1
15 4hr ev ox #1
Collection Time: 10/17/2013 3:02:48 PM
Operator Name :
Scan Software Version: 3.00(182)
Parameter List :
Instrument Cary 50
Instrument Version 3.00
Start (nm) 700.0
Stop (nm) 400.0
X Mode Nanometers
Y Mode Abs
UV-Vis Scan Rate (nm/min) 600.00
UV-Vis Data Interval (nm) 1.00
UV-Vis Ave. Time (sec) 0.1000
Beam Mode Dual Beam
Baseline Correction Off
Cycle Mode Off
Comments
Method Log :
Method Name : C:\Users\chemuser\Desktop\Pellock\heme spectra.MSW
Date/Time stamp: 10/11/2013 11:18:31 PM
Method Modifications:
Cell Changer 6x6 Changed: 10/11/2013 11:01:28 PM	Old:1	New:0
UVVIS SAT Changed: 10/11/2013 11:02:03 PM	Old:0.0125	New:0.1000
NIR SAT Changed: 10/11/2013 11:02:03 PM	Old:0.0125	New:0.1000
Common SAT Changed: 10/11/2013 11:02:03 PM	Old:0.0125	New:0.1000
UVVIS SAT Changed: 10/11/2013 11:02:19 PM	Old:0.1000	New:0.0125
NIR SAT Changed: 10/11/2013 11:02:19 PM	Old:0.1000	New:0.0125
Common SAT Changed: 10/11/2013 11:02:19 PM	Old:0.1000	New:0.0125
UVVIS SAT Changed: 10/11/2013 11:02:31 PM	Old:0.0125	New:0.5000
NIR SAT Changed: 10/11/2013 11:02:31 PM	Old:0.0125	New:0.5000
Common SAT Changed: 10/11/2013 11:02:31 PM	Old:0.0125	New:0.5000
UVVIS SAT Changed: 10/11/2013 11:02:38 PM	Old:0.5000	New:0.1000
NIR SAT Changed: 10/11/2013 11:02:38 PM	Old:0.5000	New:0.1000
Common SAT Changed: 10/11/2013 11:02:38 PM	Old:0.5000	New:0.1000
Temp Controller Changed: 10/11/2013 11:02:53 PM	Old:0	New:2
Sipper Type Changed: 10/11/2013 11:02:53 PM	Old:Internal RSA	New:External sipper
Saved as C:\Users\chemuser\Desktop\Pellock\heme spectra.MSW
Opened C:\Users\chemuser\Desktop\Pellock\heme spectra.MSW
End Method Modifications
<Current Wavelength>	401
15 4hr ev red #1
15 4hr ev red #1
Collection Time: 10/17/2013 3:04:19 PM
Operator Name :
Scan Software Version: 3.00(182)
Parameter List :
Instrument Cary 50
Instrument Version 3.00
Start (nm) 700.0
Stop (nm) 400.0
X Mode Nanometers
Y Mode Abs
UV-Vis Scan Rate (nm/min) 600.00
UV-Vis Data Interval (nm) 1.00
UV-Vis Ave. Time (sec) 0.1000
Beam Mode Dual Beam
Baseline Correction Off
Cycle Mode Off
Comments
Method Log :
Method Name : C:\Users\chemuser\Desktop\Pellock\heme spectra.MSW
Date/Time stamp: 10/11/2013 11:18:31 PM
Method Modifications:
Cell Changer 6x6 Changed: 10/11/2013 11:01:28 PM	Old:1	New:0
UVVIS SAT Changed: 10/11/2013 11:02:03 PM	Old:0.0125	New:0.1000
NIR SAT Changed: 10/11/2013 11:02:03 PM	Old:0.0125	New:0.1000
Common SAT Changed: 10/11/2013 11:02:03 PM	Old:0.0125	New:0.1000
UVVIS SAT Changed: 10/11/2013 11:02:19 PM	Old:0.1000	New:0.0125
NIR SAT Changed: 10/11/2013 11:02:19 PM	Old:0.1000	New:0.0125
Common SAT Changed: 10/11/2013 11:02:19 PM	Old:0.1000	New:0.0125
UVVIS SAT Changed: 10/11/2013 11:02:31 PM	Old:0.0125	New:0.5000
NIR SAT Changed: 10/11/2013 11:02:31 PM	Old:0.0125	New:0.5000
Common SAT Changed: 10/11/2013 11:02:31 PM	Old:0.0125	New:0.5000
UVVIS SAT Changed: 10/11/2013 11:02:38 PM	Old:0.5000	New:0.1000
NIR SAT Changed: 10/11/2013 11:02:38 PM	Old:0.5000	New:0.1000
Common SAT Changed: 10/11/2013 11:02:38 PM	Old:0.5000	New:0.1000
Temp Controller Changed: 10/11/2013 11:02:53 PM	Old:0	New:2
Sipper Type Changed: 10/11/2013 11:02:53 PM	Old:Internal RSA	New:External sipper
Saved as C:\Users\chemuser\Desktop\Pellock\heme spectra.MSW
Opened C:\Users\chemuser\Desktop\Pellock\heme spectra.MSW
End Method Modifications
<Current Wavelength>	401
15 4hr ev red #1
15 4hr ev red #1
Collection Time: 10/17/2013 3:05:35 PM
Operator Name :
Scan Software Version: 3.00(182)
Parameter List :
Instrument Cary 50
Instrument Version 3.00
Start (nm) 700.0
Stop (nm) 400.0
X Mode Nanometers
Y Mode Abs
UV-Vis Scan Rate (nm/min) 600.00
UV-Vis Data Interval (nm) 1.00
UV-Vis Ave. Time (sec) 0.1000
Beam Mode Dual Beam
Baseline Correction Off
Cycle Mode Off
Comments
Method Log :
Method Name : C:\Users\chemuser\Desktop\Pellock\heme spectra.MSW
Date/Time stamp: 10/11/2013 11:18:31 PM
Method Modifications:
Cell Changer 6x6 Changed: 10/11/2013 11:01:28 PM	Old:1	New:0
UVVIS SAT Changed: 10/11/2013 11:02:03 PM	Old:0.0125	New:0.1000
NIR SAT Changed: 10/11/2013 11:02:03 PM	Old:0.0125	New:0.1000
Common SAT Changed: 10/11/2013 11:02:03 PM	Old:0.0125	New:0.1000
UVVIS SAT Changed: 10/11/2013 11:02:19 PM	Old:0.1000	New:0.0125
NIR SAT Changed: 10/11/2013 11:02:19 PM	Old:0.1000	New:0.0125
Common SAT Changed: 10/11/2013 11:02:19 PM	Old:0.1000	New:0.0125
UVVIS SAT Changed: 10/11/2013 11:02:31 PM	Old:0.0125	New:0.5000
NIR SAT Changed: 10/11/2013 11:02:31 PM	Old:0.0125	New:0.5000
Common SAT Changed: 10/11/2013 11:02:31 PM	Old:0.0125	New:0.5000
UVVIS SAT Changed: 10/11/2013 11:02:38 PM	Old:0.5000	New:0.1000
NIR SAT Changed: 10/11/2013 11:02:38 PM	Old:0.5000	New:0.1000
Common SAT Changed: 10/11/2013 11:02:38 PM	Old:0.5000	New:0.1000
Temp Controller Changed: 10/11/2013 11:02:53 PM	Old:0	New:2
Sipper Type Changed: 10/11/2013 11:02:53 PM	Old:Internal RSA	New:External sipper
Saved as C:\Users\chemuser\Desktop\Pellock\heme spectra.MSW
Opened C:\Users\chemuser\Desktop\Pellock\heme spectra.MSW
End Method Modifications
<Current Wavelength>	401
15 4hr ev ox #2
15 4hr ev ox #2
Collection Time: 10/17/2013 3:07:03 PM
Operator Name :
Scan Software Version: 3.00(182)
Parameter List :
Instrument Cary 50
Instrument Version 3.00
Start (nm) 700.0
Stop (nm) 400.0
X Mode Nanometers
Y Mode Abs
UV-Vis Scan Rate (nm/min) 600.00
UV-Vis Data Interval (nm) 1.00
UV-Vis Ave. Time (sec) 0.1000
Beam Mode Dual Beam
Baseline Correction Off
Cycle Mode Off
Comments
Method Log :
Method Name : C:\Users\chemuser\Desktop\Pellock\heme spectra.MSW
Date/Time stamp: 10/11/2013 11:18:31 PM
Method Modifications:
Cell Changer 6x6 Changed: 10/11/2013 11:01:28 PM	Old:1	New:0
UVVIS SAT Changed: 10/11/2013 11:02:03 PM	Old:0.0125	New:0.1000
NIR SAT Changed: 10/11/2013 11:02:03 PM	Old:0.0125	New:0.1000
Common SAT Changed: 10/11/2013 11:02:03 PM	Old:0.0125	New:0.1000
UVVIS SAT Changed: 10/11/2013 11:02:19 PM	Old:0.1000	New:0.0125
NIR SAT Changed: 10/11/2013 11:02:19 PM	Old:0.1000	New:0.0125
Common SAT Changed: 10/11/2013 11:02:19 PM	Old:0.1000	New:0.0125
UVVIS SAT Changed: 10/11/2013 11:02:31 PM	Old:0.0125	New:0.5000
NIR SAT Changed: 10/11/2013 11:02:31 PM	Old:0.0125	New:0.5000
Common SAT Changed: 10/11/2013 11:02:31 PM	Old:0.0125	New:0.5000
UVVIS SAT Changed: 10/11/2013 11:02:38 PM	Old:0.5000	New:0.1000
NIR SAT Changed: 10/11/2013 11:02:38 PM	Old:0.5000	New:0.1000
Common SAT Changed: 10/11/2013 11:02:38 PM	Old:0.5000	New:0.1000
Temp Controller Changed: 10/11/2013 11:02:53 PM	Old:0	New:2
Sipper Type Changed: 10/11/2013 11:02:53 PM	Old:Internal RSA	New:External sipper
Saved as C:\Users\chemuser\Desktop\Pellock\heme spectra.MSW
Opened C:\Users\chemuser\Desktop\Pellock\heme spectra.MSW
End Method Modifications
<Current Wavelength>	401
15 4hr ev red #2
15 4hr ev red #2
Collection Time: 10/17/2013 3:08:38 PM
Operator Name :
Scan Software Version: 3.00(182)
Parameter List :
Instrument Cary 50
Instrument Version 3.00
Start (nm) 700.0
Stop (nm) 400.0
X Mode Nanometers
Y Mode Abs
UV-Vis Scan Rate (nm/min) 600.00
UV-Vis Data Interval (nm) 1.00
UV-Vis Ave. Time (sec) 0.1000
Beam Mode Dual Beam
Baseline Correction Off
Cycle Mode Off
Comments
Method Log :
Method Name : C:\Users\chemuser\Desktop\Pellock\heme spectra.MSW
Date/Time stamp: 10/11/2013 11:18:31 PM
Method Modifications:
Cell Changer 6x6 Changed: 10/11/2013 11:01:28 PM	Old:1	New:0
UVVIS SAT Changed: 10/11/2013 11:02:03 PM	Old:0.0125	New:0.1000
NIR SAT Changed: 10/11/2013 11:02:03 PM	Old:0.0125	New:0.1000
Common SAT Changed: 10/11/2013 11:02:03 PM	Old:0.0125	New:0.1000
UVVIS SAT Changed: 10/11/2013 11:02:19 PM	Old:0.1000	New:0.0125
NIR SAT Changed: 10/11/2013 11:02:19 PM	Old:0.1000	New:0.0125
Common SAT Changed: 10/11/2013 11:02:19 PM	Old:0.1000	New:0.0125
UVVIS SAT Changed: 10/11/2013 11:02:31 PM	Old:0.0125	New:0.5000
NIR SAT Changed: 10/11/2013 11:02:31 PM	Old:0.0125	New:0.5000
Common SAT Changed: 10/11/2013 11:02:31 PM	Old:0.0125	New:0.5000
UVVIS SAT Changed: 10/11/2013 11:02:38 PM	Old:0.5000	New:0.1000
NIR SAT Changed: 10/11/2013 11:02:38 PM	Old:0.5000	New:0.1000
Common SAT Changed: 10/11/2013 11:02:38 PM	Old:0.5000	New:0.1000
Temp Controller Changed: 10/11/2013 11:02:53 PM	Old:0	New:2
Sipper Type Changed: 10/11/2013 11:02:53 PM	Old:Internal RSA	New:External sipper
Saved as C:\Users\chemuser\Desktop\Pellock\heme spectra.MSW
Opened C:\Users\chemuser\Desktop\Pellock\heme spectra.MSW
End Method Modifications
<Current Wavelength>	401
15 4hr ev ox #3
15 4hr ev ox #3
Collection Time: 10/17/2013 3:10:05 PM
Operator Name :
Scan Software Version: 3.00(182)
Parameter List :
Instrument Cary 50
Instrument Version 3.00
Start (nm) 700.0
Stop (nm) 400.0
X Mode Nanometers
Y Mode Abs
UV-Vis Scan Rate (nm/min) 600.00
UV-Vis Data Interval (nm) 1.00
UV-Vis Ave. Time (sec) 0.1000
Beam Mode Dual Beam
Baseline Correction Off
Cycle Mode Off
Comments
Method Log :
Method Name : C:\Users\chemuser\Desktop\Pellock\heme spectra.MSW
Date/Time stamp: 10/11/2013 11:18:31 PM
Method Modifications:
Cell Changer 6x6 Changed: 10/11/2013 11:01:28 PM	Old:1	New:0
UVVIS SAT Changed: 10/11/2013 11:02:03 PM	Old:0.0125	New:0.1000
NIR SAT Changed: 10/11/2013 11:02:03 PM	Old:0.0125	New:0.1000
Common SAT Changed: 10/11/2013 11:02:03 PM	Old:0.0125	New:0.1000
UVVIS SAT Changed: 10/11/2013 11:02:19 PM	Old:0.1000	New:0.0125
NIR SAT Changed: 10/11/2013 11:02:19 PM	Old:0.1000	New:0.0125
Common SAT Changed: 10/11/2013 11:02:19 PM	Old:0.1000	New:0.0125
UVVIS SAT Changed: 10/11/2013 11:02:31 PM	Old:0.0125	New:0.5000
NIR SAT Changed: 10/11/2013 11:02:31 PM	Old:0.0125	New:0.5000
Common SAT Changed: 10/11/2013 11:02:31 PM	Old:0.0125	New:0.5000
UVVIS SAT Changed: 10/11/2013 11:02:38 PM	Old:0.5000	New:0.1000
NIR SAT Changed: 10/11/2013 11:02:38 PM	Old:0.5000	New:0.1000
Common SAT Changed: 10/11/2013 11:02:38 PM	Old:0.5000	New:0.1000
Temp Controller Changed: 10/11/2013 11:02:53 PM	Old:0	New:2
Sipper Type Changed: 10/11/2013 11:02:53 PM	Old:Internal RSA	New:External sipper
Saved as C:\Users\chemuser\Desktop\Pellock\heme spectra.MSW
Opened C:\Users\chemuser\Desktop\Pellock\heme spectra.MSW
End Method Modifications
<Current Wavelength>	401
15 4hr ev red #3
15 4hr ev red #3
Collection Time: 10/17/2013 3:11:46 PM
Operator Name :
Scan Software Version: 3.00(182)
Parameter List :
Instrument Cary 50
Instrument Version 3.00
Start (nm) 700.0
Stop (nm) 400.0
X Mode Nanometers
Y Mode Abs
UV-Vis Scan Rate (nm/min) 600.00
UV-Vis Data Interval (nm) 1.00
UV-Vis Ave. Time (sec) 0.1000
Beam Mode Dual Beam
Baseline Correction Off
Cycle Mode Off
Comments
Method Log :
Method Name : C:\Users\chemuser\Desktop\Pellock\heme spectra.MSW
Date/Time stamp: 10/11/2013 11:18:31 PM
Method Modifications:
Cell Changer 6x6 Changed: 10/11/2013 11:01:28 PM	Old:1	New:0
UVVIS SAT Changed: 10/11/2013 11:02:03 PM	Old:0.0125	New:0.1000
NIR SAT Changed: 10/11/2013 11:02:03 PM	Old:0.0125	New:0.1000
Common SAT Changed: 10/11/2013 11:02:03 PM	Old:0.0125	New:0.1000
UVVIS SAT Changed: 10/11/2013 11:02:19 PM	Old:0.1000	New:0.0125
NIR SAT Changed: 10/11/2013 11:02:19 PM	Old:0.1000	New:0.0125
Common SAT Changed: 10/11/2013 11:02:19 PM	Old:0.1000	New:0.0125
UVVIS SAT Changed: 10/11/2013 11:02:31 PM	Old:0.0125	New:0.5000
NIR SAT Changed: 10/11/2013 11:02:31 PM	Old:0.0125	New:0.5000
Common SAT Changed: 10/11/2013 11:02:31 PM	Old:0.0125	New:0.5000
UVVIS SAT Changed: 10/11/2013 11:02:38 PM	Old:0.5000	New:0.1000
NIR SAT Changed: 10/11/2013 11:02:38 PM	Old:0.5000	New:0.1000
Common SAT Changed: 10/11/2013 11:02:38 PM	Old:0.5000	New:0.1000
Temp Controller Changed: 10/11/2013 11:02:53 PM	Old:0	New:2
Sipper Type Changed: 10/11/2013 11:02:53 PM	Old:Internal RSA	New:External sipper
Saved as C:\Users\chemuser\Desktop\Pellock\heme spectra.MSW
Opened C:\Users\chemuser\Desktop\Pellock\heme spectra.MSW
End Method Modifications
<Current Wavelength>	401
mr1 4hr phemA ox #1
mr1 4hr phemA ox #1
Collection Time: 10/17/2013 3:16:11 PM
Operator Name :
Scan Software Version: 3.00(182)
Parameter List :
Instrument Cary 50
Instrument Version 3.00
Start (nm) 700.0
Stop (nm) 400.0
X Mode Nanometers
Y Mode Abs
UV-Vis Scan Rate (nm/min) 600.00
UV-Vis Data Interval (nm) 1.00
UV-Vis Ave. Time (sec) 0.1000
Beam Mode Dual Beam
Baseline Correction Off
Cycle Mode Off
Comments
Method Log :
Method Name : C:\Users\chemuser\Desktop\Pellock\heme spectra.MSW
Date/Time stamp: 10/11/2013 11:18:31 PM
Method Modifications:
Cell Changer 6x6 Changed: 10/11/2013 11:01:28 PM	Old:1	New:0
UVVIS SAT Changed: 10/11/2013 11:02:03 PM	Old:0.0125	New:0.1000
NIR SAT Changed: 10/11/2013 11:02:03 PM	Old:0.0125	New:0.1000
Common SAT Changed: 10/11/2013 11:02:03 PM	Old:0.0125	New:0.1000
UVVIS SAT Changed: 10/11/2013 11:02:19 PM	Old:0.1000	New:0.0125
NIR SAT Changed: 10/11/2013 11:02:19 PM	Old:0.1000	New:0.0125
Common SAT Changed: 10/11/2013 11:02:19 PM	Old:0.1000	New:0.0125
UVVIS SAT Changed: 10/11/2013 11:02:31 PM	Old:0.0125	New:0.5000
NIR SAT Changed: 10/11/2013 11:02:31 PM	Old:0.0125	New:0.5000
Common SAT Changed: 10/11/2013 11:02:31 PM	Old:0.0125	New:0.5000
UVVIS SAT Changed: 10/11/2013 11:02:38 PM	Old:0.5000	New:0.1000
NIR SAT Changed: 10/11/2013 11:02:38 PM	Old:0.5000	New:0.1000
Common SAT Changed: 10/11/2013 11:02:38 PM	Old:0.5000	New:0.1000
Temp Controller Changed: 10/11/2013 11:02:53 PM	Old:0	New:2
Sipper Type Changed: 10/11/2013 11:02:53 PM	Old:Internal RSA	New:External sipper
Saved as C:\Users\chemuser\Desktop\Pellock\heme spectra.MSW
Opened C:\Users\chemuser\Desktop\Pellock\heme spectra.MSW
End Method Modifications
<Current Wavelength>	401
mr1 4hr phemA red #1
mr1 4hr phemA red #1
Collection Time: 10/17/2013 3:17:47 PM
Operator Name :
Scan Software Version: 3.00(182)
Parameter List :
Instrument Cary 50
Instrument Version 3.00
Start (nm) 700.0
Stop (nm) 400.0
X Mode Nanometers
Y Mode Abs
UV-Vis Scan Rate (nm/min) 600.00
UV-Vis Data Interval (nm) 1.00
UV-Vis Ave. Time (sec) 0.1000
Beam Mode Dual Beam
Baseline Correction Off
Cycle Mode Off
Comments
Method Log :
Method Name : C:\Users\chemuser\Desktop\Pellock\heme spectra.MSW
Date/Time stamp: 10/11/2013 11:18:31 PM
Method Modifications:
Cell Changer 6x6 Changed: 10/11/2013 11:01:28 PM	Old:1	New:0
UVVIS SAT Changed: 10/11/2013 11:02:03 PM	Old:0.0125	New:0.1000
NIR SAT Changed: 10/11/2013 11:02:03 PM	Old:0.0125	New:0.1000
Common SAT Changed: 10/11/2013 11:02:03 PM	Old:0.0125	New:0.1000
UVVIS SAT Changed: 10/11/2013 11:02:19 PM	Old:0.1000	New:0.0125
NIR SAT Changed: 10/11/2013 11:02:19 PM	Old:0.1000	New:0.0125
Common SAT Changed: 10/11/2013 11:02:19 PM	Old:0.1000	New:0.0125
UVVIS SAT Changed: 10/11/2013 11:02:31 PM	Old:0.0125	New:0.5000
NIR SAT Changed: 10/11/2013 11:02:31 PM	Old:0.0125	New:0.5000
Common SAT Changed: 10/11/2013 11:02:31 PM	Old:0.0125	New:0.5000
UVVIS SAT Changed: 10/11/2013 11:02:38 PM	Old:0.5000	New:0.1000
NIR SAT Changed: 10/11/2013 11:02:38 PM	Old:0.5000	New:0.1000
Common SAT Changed: 10/11/2013 11:02:38 PM	Old:0.5000	New:0.1000
Temp Controller Changed: 10/11/2013 11:02:53 PM	Old:0	New:2
Sipper Type Changed: 10/11/2013 11:02:53 PM	Old:Internal RSA	New:External sipper
Saved as C:\Users\chemuser\Desktop\Pellock\heme spectra.MSW
Opened C:\Users\chemuser\Desktop\Pellock\heme spectra.MSW
End Method Modifications
<Current Wavelength>	401
mr1 4hr phemA ox #2
mr1 4hr phemA ox #2
Collection Time: 10/17/2013 3:19:10 PM
Operator Name :
Scan Software Version: 3.00(182)
Parameter List :
Instrument Cary 50
Instrument Version 3.00
Start (nm) 700.0
Stop (nm) 400.0
X Mode Nanometers
Y Mode Abs
UV-Vis Scan Rate (nm/min) 600.00
UV-Vis Data Interval (nm) 1.00
UV-Vis Ave. Time (sec) 0.1000
Beam Mode Dual Beam
Baseline Correction Off
Cycle Mode Off
Comments
Method Log :
Method Name : C:\Users\chemuser\Desktop\Pellock\heme spectra.MSW
Date/Time stamp: 10/11/2013 11:18:31 PM
Method Modifications:
Cell Changer 6x6 Changed: 10/11/2013 11:01:28 PM	Old:1	New:0
UVVIS SAT Changed: 10/11/2013 11:02:03 PM	Old:0.0125	New:0.1000
NIR SAT Changed: 10/11/2013 11:02:03 PM	Old:0.0125	New:0.1000
Common SAT Changed: 10/11/2013 11:02:03 PM	Old:0.0125	New:0.1000
UVVIS SAT Changed: 10/11/2013 11:02:19 PM	Old:0.1000	New:0.0125
NIR SAT Changed: 10/11/2013 11:02:19 PM	Old:0.1000	New:0.0125
Common SAT Changed: 10/11/2013 11:02:19 PM	Old:0.1000	New:0.0125
UVVIS SAT Changed: 10/11/2013 11:02:31 PM	Old:0.0125	New:0.5000
NIR SAT Changed: 10/11/2013 11:02:31 PM	Old:0.0125	New:0.5000
Common SAT Changed: 10/11/2013 11:02:31 PM	Old:0.0125	New:0.5000
UVVIS SAT Changed: 10/11/2013 11:02:38 PM	Old:0.5000	New:0.1000
NIR SAT Changed: 10/11/2013 11:02:38 PM	Old:0.5000	New:0.1000
Common SAT Changed: 10/11/2013 11:02:38 PM	Old:0.5000	New:0.1000
Temp Controller Changed: 10/11/2013 11:02:53 PM	Old:0	New:2
Sipper Type Changed: 10/11/2013 11:02:53 PM	Old:Internal RSA	New:External sipper
Saved as C:\Users\chemuser\Desktop\Pellock\heme spectra.MSW
Opened C:\Users\chemuser\Desktop\Pellock\heme spectra.MSW
End Method Modifications
<Current Wavelength>	401
mr1 4hr phemA red #2
mr1 4hr phemA red #2
Collection Time: 10/17/2013 3:20:32 PM
Operator Name :
Scan Software Version: 3.00(182)
Parameter List :
Instrument Cary 50
Instrument Version 3.00
Start (nm) 700.0
Stop (nm) 400.0
X Mode Nanometers
Y Mode Abs
UV-Vis Scan Rate (nm/min) 600.00
UV-Vis Data Interval (nm) 1.00
UV-Vis Ave. Time (sec) 0.1000
Beam Mode Dual Beam
Baseline Correction Off
Cycle Mode Off
Comments
Method Log :
Method Name : C:\Users\chemuser\Desktop\Pellock\heme spectra.MSW
Date/Time stamp: 10/11/2013 11:18:31 PM
Method Modifications:
Cell Changer 6x6 Changed: 10/11/2013 11:01:28 PM	Old:1	New:0
UVVIS SAT Changed: 10/11/2013 11:02:03 PM	Old:0.0125	New:0.1000
NIR SAT Changed: 10/11/2013 11:02:03 PM	Old:0.0125	New:0.1000
Common SAT Changed: 10/11/2013 11:02:03 PM	Old:0.0125	New:0.1000
UVVIS SAT Changed: 10/11/2013 11:02:19 PM	Old:0.1000	New:0.0125
NIR SAT Changed: 10/11/2013 11:02:19 PM	Old:0.1000	New:0.0125
Common SAT Changed: 10/11/2013 11:02:19 PM	Old:0.1000	New:0.0125
UVVIS SAT Changed: 10/11/2013 11:02:31 PM	Old:0.0125	New:0.5000
NIR SAT Changed: 10/11/2013 11:02:31 PM	Old:0.0125	New:0.5000
Common SAT Changed: 10/11/2013 11:02:31 PM	Old:0.0125	New:0.5000
UVVIS SAT Changed: 10/11/2013 11:02:38 PM	Old:0.5000	New:0.1000
NIR SAT Changed: 10/11/2013 11:02:38 PM	Old:0.5000	New:0.1000
Common SAT Changed: 10/11/2013 11:02:38 PM	Old:0.5000	New:0.1000
Temp Controller Changed: 10/11/2013 11:02:53 PM	Old:0	New:2
Sipper Type Changed: 10/11/2013 11:02:53 PM	Old:Internal RSA	New:External sipper
Saved as C:\Users\chemuser\Desktop\Pellock\heme spectra.MSW
Opened C:\Users\chemuser\Desktop\Pellock\heme spectra.MSW
End Method Modifications
<Current Wavelength>	401
mr1 4hr phemA ox #3
mr1 4hr phemA ox #3
Collection Time: 10/17/2013 3:22:01 PM
Operator Name :
Scan Software Version: 3.00(182)
Parameter List :
Instrument Cary 50
Instrument Version 3.00
Start (nm) 700.0
Stop (nm) 400.0
X Mode Nanometers
Y Mode Abs
UV-Vis Scan Rate (nm/min) 600.00
UV-Vis Data Interval (nm) 1.00
UV-Vis Ave. Time (sec) 0.1000
Beam Mode Dual Beam
Baseline Correction Off
Cycle Mode Off
Comments
Method Log :
Method Name : C:\Users\chemuser\Desktop\Pellock\heme spectra.MSW
Date/Time stamp: 10/11/2013 11:18:31 PM
Method Modifications:
Cell Changer 6x6 Changed: 10/11/2013 11:01:28 PM	Old:1	New:0
UVVIS SAT Changed: 10/11/2013 11:02:03 PM	Old:0.0125	New:0.1000
NIR SAT Changed: 10/11/2013 11:02:03 PM	Old:0.0125	New:0.1000
Common SAT Changed: 10/11/2013 11:02:03 PM	Old:0.0125	New:0.1000
UVVIS SAT Changed: 10/11/2013 11:02:19 PM	Old:0.1000	New:0.0125
NIR SAT Changed: 10/11/2013 11:02:19 PM	Old:0.1000	New:0.0125
Common SAT Changed: 10/11/2013 11:02:19 PM	Old:0.1000	New:0.0125
UVVIS SAT Changed: 10/11/2013 11:02:31 PM	Old:0.0125	New:0.5000
NIR SAT Changed: 10/11/2013 11:02:31 PM	Old:0.0125	New:0.5000
Common SAT Changed: 10/11/2013 11:02:31 PM	Old:0.0125	New:0.5000
UVVIS SAT Changed: 10/11/2013 11:02:38 PM	Old:0.5000	New:0.1000
NIR SAT Changed: 10/11/2013 11:02:38 PM	Old:0.5000	New:0.1000
Common SAT Changed: 10/11/2013 11:02:38 PM	Old:0.5000	New:0.1000
Temp Controller Changed: 10/11/2013 11:02:53 PM	Old:0	New:2
Sipper Type Changed: 10/11/2013 11:02:53 PM	Old:Internal RSA	New:External sipper
Saved as C:\Users\chemuser\Desktop\Pellock\heme spectra.MSW
Opened C:\Users\chemuser\Desktop\Pellock\heme spectra.MSW
End Method Modifications
<Current Wavelength>	401
mr1 4hr phemA red #3
mr1 4hr phemA red #3
Collection Time: 10/17/2013 3:23:22 PM
Operator Name :
Scan Software Version: 3.00(182)
Parameter List :
Instrument Cary 50
Instrument Version 3.00
Start (nm) 700.0
Stop (nm) 400.0
X Mode Nanometers
Y Mode Abs
UV-Vis Scan Rate (nm/min) 600.00
UV-Vis Data Interval (nm) 1.00
UV-Vis Ave. Time (sec) 0.1000
Beam Mode Dual Beam
Baseline Correction Off
Cycle Mode Off
Comments
Method Log :
Method Name : C:\Users\chemuser\Desktop\Pellock\heme spectra.MSW
Date/Time stamp: 10/11/2013 11:18:31 PM
Method Modifications:
Cell Changer 6x6 Changed: 10/11/2013 11:01:28 PM	Old:1	New:0
UVVIS SAT Changed: 10/11/2013 11:02:03 PM	Old:0.0125	New:0.1000
NIR SAT Changed: 10/11/2013 11:02:03 PM	Old:0.0125	New:0.1000
Common SAT Changed: 10/11/2013 11:02:03 PM	Old:0.0125	New:0.1000
UVVIS SAT Changed: 10/11/2013 11:02:19 PM	Old:0.1000	New:0.0125
NIR SAT Changed: 10/11/2013 11:02:19 PM	Old:0.1000	New:0.0125
Common SAT Changed: 10/11/2013 11:02:19 PM	Old:0.1000	New:0.0125
UVVIS SAT Changed: 10/11/2013 11:02:31 PM	Old:0.0125	New:0.5000
NIR SAT Changed: 10/11/2013 11:02:31 PM	Old:0.0125	New:0.5000
Common SAT Changed: 10/11/2013 11:02:31 PM	Old:0.0125	New:0.5000
UVVIS SAT Changed: 10/11/2013 11:02:38 PM	Old:0.5000	New:0.1000
NIR SAT Changed: 10/11/2013 11:02:38 PM	Old:0.5000	New:0.1000
Common SAT Changed: 10/11/2013 11:02:38 PM	Old:0.5000	New:0.1000
Temp Controller Changed: 10/11/2013 11:02:53 PM	Old:0	New:2
Sipper Type Changed: 10/11/2013 11:02:53 PM	Old:Internal RSA	New:External sipper
Saved as C:\Users\chemuser\Desktop\Pellock\heme spectra.MSW
Opened C:\Users\chemuser\Desktop\Pellock\heme spectra.MSW
End Method Modifications
<Current Wavelength>	401
15 4hr phemA ox #1
15 4hr phemA ox #1
Collection Time: 10/17/2013 3:27:07 PM
Operator Name :
Scan Software Version: 3.00(182)
Parameter List :
Instrument Cary 50
Instrument Version 3.00
Start (nm) 700.0
Stop (nm) 400.0
X Mode Nanometers
Y Mode Abs
UV-Vis Scan Rate (nm/min) 600.00
UV-Vis Data Interval (nm) 1.00
UV-Vis Ave. Time (sec) 0.1000
Beam Mode Dual Beam
Baseline Correction Off
Cycle Mode Off
Comments
Method Log :
Method Name : C:\Users\chemuser\Desktop\Pellock\heme spectra.MSW
Date/Time stamp: 10/11/2013 11:18:31 PM
Method Modifications:
Cell Changer 6x6 Changed: 10/11/2013 11:01:28 PM	Old:1	New:0
UVVIS SAT Changed: 10/11/2013 11:02:03 PM	Old:0.0125	New:0.1000
NIR SAT Changed: 10/11/2013 11:02:03 PM	Old:0.0125	New:0.1000
Common SAT Changed: 10/11/2013 11:02:03 PM	Old:0.0125	New:0.1000
UVVIS SAT Changed: 10/11/2013 11:02:19 PM	Old:0.1000	New:0.0125
NIR SAT Changed: 10/11/2013 11:02:19 PM	Old:0.1000	New:0.0125
Common SAT Changed: 10/11/2013 11:02:19 PM	Old:0.1000	New:0.0125
UVVIS SAT Changed: 10/11/2013 11:02:31 PM	Old:0.0125	New:0.5000
NIR SAT Changed: 10/11/2013 11:02:31 PM	Old:0.0125	New:0.5000
Common SAT Changed: 10/11/2013 11:02:31 PM	Old:0.0125	New:0.5000
UVVIS SAT Changed: 10/11/2013 11:02:38 PM	Old:0.5000	New:0.1000
NIR SAT Changed: 10/11/2013 11:02:38 PM	Old:0.5000	New:0.1000
Common SAT Changed: 10/11/2013 11:02:38 PM	Old:0.5000	New:0.1000
Temp Controller Changed: 10/11/2013 11:02:53 PM	Old:0	New:2
Sipper Type Changed: 10/11/2013 11:02:53 PM	Old:Internal RSA	New:External sipper
Saved as C:\Users\chemuser\Desktop\Pellock\heme spectra.MSW
Opened C:\Users\chemuser\Desktop\Pellock\heme spectra.MSW
End Method Modifications
<Current Wavelength>	401
15 4hr phemA red #1
15 4hr phemA red #1
Collection Time: 10/17/2013 3:28:28 PM
Operator Name :
Scan Software Version: 3.00(182)
Parameter List :
Instrument Cary 50
Instrument Version 3.00
Start (nm) 700.0
Stop (nm) 400.0
X Mode Nanometers
Y Mode Abs
UV-Vis Scan Rate (nm/min) 600.00
UV-Vis Data Interval (nm) 1.00
UV-Vis Ave. Time (sec) 0.1000
Beam Mode Dual Beam
Baseline Correction Off
Cycle Mode Off
Comments
Method Log :
Method Name : C:\Users\chemuser\Desktop\Pellock\heme spectra.MSW
Date/Time stamp: 10/11/2013 11:18:31 PM
Method Modifications:
Cell Changer 6x6 Changed: 10/11/2013 11:01:28 PM	Old:1	New:0
UVVIS SAT Changed: 10/11/2013 11:02:03 PM	Old:0.0125	New:0.1000
NIR SAT Changed: 10/11/2013 11:02:03 PM	Old:0.0125	New:0.1000
Common SAT Changed: 10/11/2013 11:02:03 PM	Old:0.0125	New:0.1000
UVVIS SAT Changed: 10/11/2013 11:02:19 PM	Old:0.1000	New:0.0125
NIR SAT Changed: 10/11/2013 11:02:19 PM	Old:0.1000	New:0.0125
Common SAT Changed: 10/11/2013 11:02:19 PM	Old:0.1000	New:0.0125
UVVIS SAT Changed: 10/11/2013 11:02:31 PM	Old:0.0125	New:0.5000
NIR SAT Changed: 10/11/2013 11:02:31 PM	Old:0.0125	New:0.5000
Common SAT Changed: 10/11/2013 11:02:31 PM	Old:0.0125	New:0.5000
UVVIS SAT Changed: 10/11/2013 11:02:38 PM	Old:0.5000	New:0.1000
NIR SAT Changed: 10/11/2013 11:02:38 PM	Old:0.5000	New:0.1000
Common SAT Changed: 10/11/2013 11:02:38 PM	Old:0.5000	New:0.1000
Temp Controller Changed: 10/11/2013 11:02:53 PM	Old:0	New:2
Sipper Type Changed: 10/11/2013 11:02:53 PM	Old:Internal RSA	New:External sipper
Saved as C:\Users\chemuser\Desktop\Pellock\heme spectra.MSW
Opened C:\Users\chemuser\Desktop\Pellock\heme spectra.MSW
End Method Modifications
<Current Wavelength>	401
15 4hr phemA ox #2
15 4hr phemA ox #2
Collection Time: 10/17/2013 3:29:55 PM
Operator Name :
Scan Software Version: 3.00(182)
Parameter List :
Instrument Cary 50
Instrument Version 3.00
Start (nm) 700.0
Stop (nm) 400.0
X Mode Nanometers
Y Mode Abs
UV-Vis Scan Rate (nm/min) 600.00
UV-Vis Data Interval (nm) 1.00
UV-Vis Ave. Time (sec) 0.1000
Beam Mode Dual Beam
Baseline Correction Off
Cycle Mode Off
Comments
Method Log :
Method Name : C:\Users\chemuser\Desktop\Pellock\heme spectra.MSW
Date/Time stamp: 10/11/2013 11:18:31 PM
Method Modifications:
Cell Changer 6x6 Changed: 10/11/2013 11:01:28 PM	Old:1	New:0
UVVIS SAT Changed: 10/11/2013 11:02:03 PM	Old:0.0125	New:0.1000
NIR SAT Changed: 10/11/2013 11:02:03 PM	Old:0.0125	New:0.1000
Common SAT Changed: 10/11/2013 11:02:03 PM	Old:0.0125	New:0.1000
UVVIS SAT Changed: 10/11/2013 11:02:19 PM	Old:0.1000	New:0.0125
NIR SAT Changed: 10/11/2013 11:02:19 PM	Old:0.1000	New:0.0125
Common SAT Changed: 10/11/2013 11:02:19 PM	Old:0.1000	New:0.0125
UVVIS SAT Changed: 10/11/2013 11:02:31 PM	Old:0.0125	New:0.5000
NIR SAT Changed: 10/11/2013 11:02:31 PM	Old:0.0125	New:0.5000
Common SAT Changed: 10/11/2013 11:02:31 PM	Old:0.0125	New:0.5000
UVVIS SAT Changed: 10/11/2013 11:02:38 PM	Old:0.5000	New:0.1000
NIR SAT Changed: 10/11/2013 11:02:38 PM	Old:0.5000	New:0.1000
Common SAT Changed: 10/11/2013 11:02:38 PM	Old:0.5000	New:0.1000
Temp Controller Changed: 10/11/2013 11:02:53 PM	Old:0	New:2
Sipper Type Changed: 10/11/2013 11:02:53 PM	Old:Internal RSA	New:External sipper
Saved as C:\Users\chemuser\Desktop\Pellock\heme spectra.MSW
Opened C:\Users\chemuser\Desktop\Pellock\heme spectra.MSW
End Method Modifications
<Current Wavelength>	401
15 4hr phemA red #2
15 4hr phemA red #2
Collection Time: 10/17/2013 3:31:37 PM
Operator Name :
Scan Software Version: 3.00(182)
Parameter List :
Instrument Cary 50
Instrument Version 3.00
Start (nm) 700.0
Stop (nm) 400.0
X Mode Nanometers
Y Mode Abs
UV-Vis Scan Rate (nm/min) 600.00
UV-Vis Data Interval (nm) 1.00
UV-Vis Ave. Time (sec) 0.1000
Beam Mode Dual Beam
Baseline Correction Off
Cycle Mode Off
Comments
Method Log :
Method Name : C:\Users\chemuser\Desktop\Pellock\heme spectra.MSW
Date/Time stamp: 10/11/2013 11:18:31 PM
Method Modifications:
Cell Changer 6x6 Changed: 10/11/2013 11:01:28 PM	Old:1	New:0
UVVIS SAT Changed: 10/11/2013 11:02:03 PM	Old:0.0125	New:0.1000
NIR SAT Changed: 10/11/2013 11:02:03 PM	Old:0.0125	New:0.1000
Common SAT Changed: 10/11/2013 11:02:03 PM	Old:0.0125	New:0.1000
UVVIS SAT Changed: 10/11/2013 11:02:19 PM	Old:0.1000	New:0.0125
NIR SAT Changed: 10/11/2013 11:02:19 PM	Old:0.1000	New:0.0125
Common SAT Changed: 10/11/2013 11:02:19 PM	Old:0.1000	New:0.0125
UVVIS SAT Changed: 10/11/2013 11:02:31 PM	Old:0.0125	New:0.5000
NIR SAT Changed: 10/11/2013 11:02:31 PM	Old:0.0125	New:0.5000
Common SAT Changed: 10/11/2013 11:02:31 PM	Old:0.0125	New:0.5000
UVVIS SAT Changed: 10/11/2013 11:02:38 PM	Old:0.5000	New:0.1000
NIR SAT Changed: 10/11/2013 11:02:38 PM	Old:0.5000	New:0.1000
Common SAT Changed: 10/11/2013 11:02:38 PM	Old:0.5000	New:0.1000
Temp Controller Changed: 10/11/2013 11:02:53 PM	Old:0	New:2
Sipper Type Changed: 10/11/2013 11:02:53 PM	Old:Internal RSA	New:External sipper
Saved as C:\Users\chemuser\Desktop\Pellock\heme spectra.MSW
Opened C:\Users\chemuser\Desktop\Pellock\heme spectra.MSW
End Method Modifications
<Current Wavelength>	401
15 4hr phemA ox #3
15 4hr phemA ox #3
Collection Time: 10/17/2013 3:32:56 PM
Operator Name :
Scan Software Version: 3.00(182)
Parameter List :
Instrument Cary 50
Instrument Version 3.00
Start (nm) 700.0
Stop (nm) 400.0
X Mode Nanometers
Y Mode Abs
UV-Vis Scan Rate (nm/min) 600.00
UV-Vis Data Interval (nm) 1.00
UV-Vis Ave. Time (sec) 0.1000
Beam Mode Dual Beam
Baseline Correction Off
Cycle Mode Off
Comments
Method Log :
Method Name : C:\Users\chemuser\Desktop\Pellock\heme spectra.MSW
Date/Time stamp: 10/11/2013 11:18:31 PM
Method Modifications:
Cell Changer 6x6 Changed: 10/11/2013 11:01:28 PM	Old:1	New:0
UVVIS SAT Changed: 10/11/2013 11:02:03 PM	Old:0.0125	New:0.1000
NIR SAT Changed: 10/11/2013 11:02:03 PM	Old:0.0125	New:0.1000
Common SAT Changed: 10/11/2013 11:02:03 PM	Old:0.0125	New:0.1000
UVVIS SAT Changed: 10/11/2013 11:02:19 PM	Old:0.1000	New:0.0125
NIR SAT Changed: 10/11/2013 11:02:19 PM	Old:0.1000	New:0.0125
Common SAT Changed: 10/11/2013 11:02:19 PM	Old:0.1000	New:0.0125
UVVIS SAT Changed: 10/11/2013 11:02:31 PM	Old:0.0125	New:0.5000
NIR SAT Changed: 10/11/2013 11:02:31 PM	Old:0.0125	New:0.5000
Common SAT Changed: 10/11/2013 11:02:31 PM	Old:0.0125	New:0.5000
UVVIS SAT Changed: 10/11/2013 11:02:38 PM	Old:0.5000	New:0.1000
NIR SAT Changed: 10/11/2013 11:02:38 PM	Old:0.5000	New:0.1000
Common SAT Changed: 10/11/2013 11:02:38 PM	Old:0.5000	New:0.1000
Temp Controller Changed: 10/11/2013 11:02:53 PM	Old:0	New:2
Sipper Type Changed: 10/11/2013 11:02:53 PM	Old:Internal RSA	New:External sipper
Saved as C:\Users\chemuser\Desktop\Pellock\heme spectra.MSW
Opened C:\Users\chemuser\Desktop\Pellock\heme spectra.MSW
End Method Modifications
<Current Wavelength>	401
15 4hr phemA red #3
15 4hr phemA red #3
Collection Time: 10/17/2013 3:34:24 PM
Operator Name :
Scan Software Version: 3.00(182)
Parameter List :
Instrument Cary 50
Instrument Version 3.00
Start (nm) 700.0
Stop (nm) 400.0
X Mode Nanometers
Y Mode Abs
UV-Vis Scan Rate (nm/min) 600.00
UV-Vis Data Interval (nm) 1.00
UV-Vis Ave. Time (sec) 0.1000
Beam Mode Dual Beam
Baseline Correction Off
Cycle Mode Off
Comments
Method Log :
Method Name : C:\Users\chemuser\Desktop\Pellock\heme spectra.MSW
Date/Time stamp: 10/11/2013 11:18:31 PM
Method Modifications:
Cell Changer 6x6 Changed: 10/11/2013 11:01:28 PM	Old:1	New:0
UVVIS SAT Changed: 10/11/2013 11:02:03 PM	Old:0.0125	New:0.1000
NIR SAT Changed: 10/11/2013 11:02:03 PM	Old:0.0125	New:0.1000
Common SAT Changed: 10/11/2013 11:02:03 PM	Old:0.0125	New:0.1000
UVVIS SAT Changed: 10/11/2013 11:02:19 PM	Old:0.1000	New:0.0125
NIR SAT Changed: 10/11/2013 11:02:19 PM	Old:0.1000	New:0.0125
Common SAT Changed: 10/11/2013 11:02:19 PM	Old:0.1000	New:0.0125
UVVIS SAT Changed: 10/11/2013 11:02:31 PM	Old:0.0125	New:0.5000
NIR SAT Changed: 10/11/2013 11:02:31 PM	Old:0.0125	New:0.5000
Common SAT Changed: 10/11/2013 11:02:31 PM	Old:0.0125	New:0.5000
UVVIS SAT Changed: 10/11/2013 11:02:38 PM	Old:0.5000	New:0.1000
NIR SAT Changed: 10/11/2013 11:02:38 PM	Old:0.5000	New:0.1000
Common SAT Changed: 10/11/2013 11:02:38 PM	Old:0.5000	New:0.1000
Temp Controller Changed: 10/11/2013 11:02:53 PM	Old:0	New:2
Sipper Type Changed: 10/11/2013 11:02:53 PM	Old:Internal RSA	New:External sipper
Saved as C:\Users\chemuser\Desktop\Pellock\heme spectra.MSW
Opened C:\Users\chemuser\Desktop\Pellock\heme spectra.MSW
End Method Modifications
<Current Wavelength>	401
mr1 8hr ev ox #1
mr1 8hr ev ox #1
Collection Time: 10/17/2013 3:38:00 PM
Operator Name :
Scan Software Version: 3.00(182)
Parameter List :
Instrument Cary 50
Instrument Version 3.00
Start (nm) 700.0
Stop (nm) 400.0
X Mode Nanometers
Y Mode Abs
UV-Vis Scan Rate (nm/min) 600.00
UV-Vis Data Interval (nm) 1.00
UV-Vis Ave. Time (sec) 0.1000
Beam Mode Dual Beam
Baseline Correction Off
Cycle Mode Off
Comments
Method Log :
Method Name : C:\Users\chemuser\Desktop\Pellock\heme spectra.MSW
Date/Time stamp: 10/11/2013 11:18:31 PM
Method Modifications:
Cell Changer 6x6 Changed: 10/11/2013 11:01:28 PM	Old:1	New:0
UVVIS SAT Changed: 10/11/2013 11:02:03 PM	Old:0.0125	New:0.1000
NIR SAT Changed: 10/11/2013 11:02:03 PM	Old:0.0125	New:0.1000
Common SAT Changed: 10/11/2013 11:02:03 PM	Old:0.0125	New:0.1000
UVVIS SAT Changed: 10/11/2013 11:02:19 PM	Old:0.1000	New:0.0125
NIR SAT Changed: 10/11/2013 11:02:19 PM	Old:0.1000	New:0.0125
Common SAT Changed: 10/11/2013 11:02:19 PM	Old:0.1000	New:0.0125
UVVIS SAT Changed: 10/11/2013 11:02:31 PM	Old:0.0125	New:0.5000
NIR SAT Changed: 10/11/2013 11:02:31 PM	Old:0.0125	New:0.5000
Common SAT Changed: 10/11/2013 11:02:31 PM	Old:0.0125	New:0.5000
UVVIS SAT Changed: 10/11/2013 11:02:38 PM	Old:0.5000	New:0.1000
NIR SAT Changed: 10/11/2013 11:02:38 PM	Old:0.5000	New:0.1000
Common SAT Changed: 10/11/2013 11:02:38 PM	Old:0.5000	New:0.1000
Temp Controller Changed: 10/11/2013 11:02:53 PM	Old:0	New:2
Sipper Type Changed: 10/11/2013 11:02:53 PM	Old:Internal RSA	New:External sipper
Saved as C:\Users\chemuser\Desktop\Pellock\heme spectra.MSW
Opened C:\Users\chemuser\Desktop\Pellock\heme spectra.MSW
End Method Modifications
<Current Wavelength>	401
mr1 8hr ev red #1
mr1 8hr ev red #1
Collection Time: 10/17/2013 3:39:25 PM
Operator Name :
Scan Software Version: 3.00(182)
Parameter List :
Instrument Cary 50
Instrument Version 3.00
Start (nm) 700.0
Stop (nm) 400.0
X Mode Nanometers
Y Mode Abs
UV-Vis Scan Rate (nm/min) 600.00
UV-Vis Data Interval (nm) 1.00
UV-Vis Ave. Time (sec) 0.1000
Beam Mode Dual Beam
Baseline Correction Off
Cycle Mode Off
Comments
Method Log :
Method Name : C:\Users\chemuser\Desktop\Pellock\heme spectra.MSW
Date/Time stamp: 10/11/2013 11:18:31 PM
Method Modifications:
Cell Changer 6x6 Changed: 10/11/2013 11:01:28 PM	Old:1	New:0
UVVIS SAT Changed: 10/11/2013 11:02:03 PM	Old:0.0125	New:0.1000
NIR SAT Changed: 10/11/2013 11:02:03 PM	Old:0.0125	New:0.1000
Common SAT Changed: 10/11/2013 11:02:03 PM	Old:0.0125	New:0.1000
UVVIS SAT Changed: 10/11/2013 11:02:19 PM	Old:0.1000	New:0.0125
NIR SAT Changed: 10/11/2013 11:02:19 PM	Old:0.1000	New:0.0125
Common SAT Changed: 10/11/2013 11:02:19 PM	Old:0.1000	New:0.0125
UVVIS SAT Changed: 10/11/2013 11:02:31 PM	Old:0.0125	New:0.5000
NIR SAT Changed: 10/11/2013 11:02:31 PM	Old:0.0125	New:0.5000
Common SAT Changed: 10/11/2013 11:02:31 PM	Old:0.0125	New:0.5000
UVVIS SAT Changed: 10/11/2013 11:02:38 PM	Old:0.5000	New:0.1000
NIR SAT Changed: 10/11/2013 11:02:38 PM	Old:0.5000	New:0.1000
Common SAT Changed: 10/11/2013 11:02:38 PM	Old:0.5000	New:0.1000
Temp Controller Changed: 10/11/2013 11:02:53 PM	Old:0	New:2
Sipper Type Changed: 10/11/2013 11:02:53 PM	Old:Internal RSA	New:External sipper
Saved as C:\Users\chemuser\Desktop\Pellock\heme spectra.MSW
Opened C:\Users\chemuser\Desktop\Pellock\heme spectra.MSW
End Method Modifications
<Current Wavelength>	401
mr1 8hr ev ox #2
mr1 8hr ev ox #2
Collection Time: 10/17/2013 3:40:48 PM
Operator Name :
Scan Software Version: 3.00(182)
Parameter List :
Instrument Cary 50
Instrument Version 3.00
Start (nm) 700.0
Stop (nm) 400.0
X Mode Nanometers
Y Mode Abs
UV-Vis Scan Rate (nm/min) 600.00
UV-Vis Data Interval (nm) 1.00
UV-Vis Ave. Time (sec) 0.1000
Beam Mode Dual Beam
Baseline Correction Off
Cycle Mode Off
Comments
Method Log :
Method Name : C:\Users\chemuser\Desktop\Pellock\heme spectra.MSW
Date/Time stamp: 10/11/2013 11:18:31 PM
Method Modifications:
Cell Changer 6x6 Changed: 10/11/2013 11:01:28 PM	Old:1	New:0
UVVIS SAT Changed: 10/11/2013 11:02:03 PM	Old:0.0125	New:0.1000
NIR SAT Changed: 10/11/2013 11:02:03 PM	Old:0.0125	New:0.1000
Common SAT Changed: 10/11/2013 11:02:03 PM	Old:0.0125	New:0.1000
UVVIS SAT Changed: 10/11/2013 11:02:19 PM	Old:0.1000	New:0.0125
NIR SAT Changed: 10/11/2013 11:02:19 PM	Old:0.1000	New:0.0125
Common SAT Changed: 10/11/2013 11:02:19 PM	Old:0.1000	New:0.0125
UVVIS SAT Changed: 10/11/2013 11:02:31 PM	Old:0.0125	New:0.5000
NIR SAT Changed: 10/11/2013 11:02:31 PM	Old:0.0125	New:0.5000
Common SAT Changed: 10/11/2013 11:02:31 PM	Old:0.0125	New:0.5000
UVVIS SAT Changed: 10/11/2013 11:02:38 PM	Old:0.5000	New:0.1000
NIR SAT Changed: 10/11/2013 11:02:38 PM	Old:0.5000	New:0.1000
Common SAT Changed: 10/11/2013 11:02:38 PM	Old:0.5000	New:0.1000
Temp Controller Changed: 10/11/2013 11:02:53 PM	Old:0	New:2
Sipper Type Changed: 10/11/2013 11:02:53 PM	Old:Internal RSA	New:External sipper
Saved as C:\Users\chemuser\Desktop\Pellock\heme spectra.MSW
Opened C:\Users\chemuser\Desktop\Pellock\heme spectra.MSW
End Method Modifications
<Current Wavelength>	401
mr1 8hr ev red #2
mr1 8hr ev red #2
Collection Time: 10/17/2013 3:42:10 PM
Operator Name :
Scan Software Version: 3.00(182)
Parameter List :
Instrument Cary 50
Instrument Version 3.00
Start (nm) 700.0
Stop (nm) 400.0
X Mode Nanometers
Y Mode Abs
UV-Vis Scan Rate (nm/min) 600.00
UV-Vis Data Interval (nm) 1.00
UV-Vis Ave. Time (sec) 0.1000
Beam Mode Dual Beam
Baseline Correction Off
Cycle Mode Off
Comments
Method Log :
Method Name : C:\Users\chemuser\Desktop\Pellock\heme spectra.MSW
Date/Time stamp: 10/11/2013 11:18:31 PM
Method Modifications:
Cell Changer 6x6 Changed: 10/11/2013 11:01:28 PM	Old:1	New:0
UVVIS SAT Changed: 10/11/2013 11:02:03 PM	Old:0.0125	New:0.1000
NIR SAT Changed: 10/11/2013 11:02:03 PM	Old:0.0125	New:0.1000
Common SAT Changed: 10/11/2013 11:02:03 PM	Old:0.0125	New:0.1000
UVVIS SAT Changed: 10/11/2013 11:02:19 PM	Old:0.1000	New:0.0125
NIR SAT Changed: 10/11/2013 11:02:19 PM	Old:0.1000	New:0.0125
Common SAT Changed: 10/11/2013 11:02:19 PM	Old:0.1000	New:0.0125
UVVIS SAT Changed: 10/11/2013 11:02:31 PM	Old:0.0125	New:0.5000
NIR SAT Changed: 10/11/2013 11:02:31 PM	Old:0.0125	New:0.5000
Common SAT Changed: 10/11/2013 11:02:31 PM	Old:0.0125	New:0.5000
UVVIS SAT Changed: 10/11/2013 11:02:38 PM	Old:0.5000	New:0.1000
NIR SAT Changed: 10/11/2013 11:02:38 PM	Old:0.5000	New:0.1000
Common SAT Changed: 10/11/2013 11:02:38 PM	Old:0.5000	New:0.1000
Temp Controller Changed: 10/11/2013 11:02:53 PM	Old:0	New:2
Sipper Type Changed: 10/11/2013 11:02:53 PM	Old:Internal RSA	New:External sipper
Saved as C:\Users\chemuser\Desktop\Pellock\heme spectra.MSW
Opened C:\Users\chemuser\Desktop\Pellock\heme spectra.MSW
End Method Modifications
<Current Wavelength>	401
mr1 8hr ev ox #3
mr1 8hr ev ox #3
Collection Time: 10/17/2013 3:43:26 PM
Operator Name :
Scan Software Version: 3.00(182)
Parameter List :
Instrument Cary 50
Instrument Version 3.00
Start (nm) 700.0
Stop (nm) 400.0
X Mode Nanometers
Y Mode Abs
UV-Vis Scan Rate (nm/min) 600.00
UV-Vis Data Interval (nm) 1.00
UV-Vis Ave. Time (sec) 0.1000
Beam Mode Dual Beam
Baseline Correction Off
Cycle Mode Off
Comments
Method Log :
Method Name : C:\Users\chemuser\Desktop\Pellock\heme spectra.MSW
Date/Time stamp: 10/11/2013 11:18:31 PM
Method Modifications:
Cell Changer 6x6 Changed: 10/11/2013 11:01:28 PM	Old:1	New:0
UVVIS SAT Changed: 10/11/2013 11:02:03 PM	Old:0.0125	New:0.1000
NIR SAT Changed: 10/11/2013 11:02:03 PM	Old:0.0125	New:0.1000
Common SAT Changed: 10/11/2013 11:02:03 PM	Old:0.0125	New:0.1000
UVVIS SAT Changed: 10/11/2013 11:02:19 PM	Old:0.1000	New:0.0125
NIR SAT Changed: 10/11/2013 11:02:19 PM	Old:0.1000	New:0.0125
Common SAT Changed: 10/11/2013 11:02:19 PM	Old:0.1000	New:0.0125
UVVIS SAT Changed: 10/11/2013 11:02:31 PM	Old:0.0125	New:0.5000
NIR SAT Changed: 10/11/2013 11:02:31 PM	Old:0.0125	New:0.5000
Common SAT Changed: 10/11/2013 11:02:31 PM	Old:0.0125	New:0.5000
UVVIS SAT Changed: 10/11/2013 11:02:38 PM	Old:0.5000	New:0.1000
NIR SAT Changed: 10/11/2013 11:02:38 PM	Old:0.5000	New:0.1000
Common SAT Changed: 10/11/2013 11:02:38 PM	Old:0.5000	New:0.1000
Temp Controller Changed: 10/11/2013 11:02:53 PM	Old:0	New:2
Sipper Type Changed: 10/11/2013 11:02:53 PM	Old:Internal RSA	New:External sipper
Saved as C:\Users\chemuser\Desktop\Pellock\heme spectra.MSW
Opened C:\Users\chemuser\Desktop\Pellock\heme spectra.MSW
End Method Modifications
<Current Wavelength>	401
mr1 8hr ev red #3
mr1 8hr ev red #3
Collection Time: 10/17/2013 3:44:53 PM
Operator Name :
Scan Software Version: 3.00(182)
Parameter List :
Instrument Cary 50
Instrument Version 3.00
Start (nm) 700.0
Stop (nm) 400.0
X Mode Nanometers
Y Mode Abs
UV-Vis Scan Rate (nm/min) 600.00
UV-Vis Data Interval (nm) 1.00
[truncated: 784 more rows]
[truncated: 50 more columns]

## Sheet: Fig. 4D processed
											Comparison	T-test P value
[truncated: 43 more rows]
